# Supplementary material for: A large-scale proteomics resource of circulating extracellular vesicles for biomarker discovery in pancreatic cancer
Source: eLife. 2024 Dec 18;12:RP87369. doi: 10.7554/eLife.87369 (PMC11655061; doi:10.7554/eLife.87369)
Supplement: Supplementary file 1. [file elife-87369-supp1.xlsx]

## Sheet: Sheet1
	Supplementary Table 1. Baseline characteristics of patients enrolled on the discovery cohort
		Pancreatic Cancer			Chronic Pancreatitis	IPMN*	Controls
		I-II	III-IV	All Stages
	Number of subjects	30	63	93	12	8	11
	Age (mean, range)	72.36 (58-91)	63.6 (37-82)	66.5 (37-91)	57.5 (37-78)	68.2 (50-89)	53.4 (31-83)
	Gender (F)	0.433	0.523	0.484	0.5	0.875	0.545
	Baseline CA19-9 (mean, range)	246.96 (4- 2,421)	24,054 (4-700,000)	16,118 (4-700,000)	-	-	-
	* IPMN group was comprised of two patients with main duct lesions and six patients with side-branch lesions.
