# Supplementary material for: A large-scale proteomics resource of circulating extracellular vesicles for biomarker discovery in pancreatic cancer
Source: eLife. 2024 Dec 18;12:RP87369. doi: 10.7554/eLife.87369 (PMC11655061; doi:10.7554/eLife.87369)
Supplement: Supplementary file 2. [file elife-87369-supp2.xlsx]

## Sheet: Sheet1
Supplementary Table 2. Plasma EV analysis reproducibility
Abundances (Normalized): Plasma1	Abundances (Normalized): Plasma2	Abundances (Normalized): Plasma3	Abundances (Normalized): Plasma4	Abundances (Normalized): Plasma5	Abundances (Normalized): Plasma6	Coverage [%]	# Unique Peptides	Mean	Standard deviation	Coefficient of variation	Accession	Gene Name	Number	Description
21.1029	28.4482	20.4387	28.8078	28.9307	20.6774	14	1	24.7343	4.38393	0.177241	Q15843	NEDD8	1	NEDD8 [OS=Homo sapiens]
19.2035	20.2224	26.0173	26.7407	21.9411	20.0598	14	5	22.3642	3.24238	0.144981	Q9H8Y8	GORASP2	2	Golgi reassembly-stacking protein 2 [OS=Homo sapiens]
18.49	21.9575	16.2637	20.0781	19.8682	14.7639	2	1	18.5702	2.65506	0.142974	Q6N069	NAA16	3	N-alpha-acetyltransferase 16, NatA auxiliary subunit [OS=Homo sapiens]
24.4736	23.137	22.5387	21.3738	19.6859	17.266	28	4	21.4125	2.59955	0.121403	P10451	SPP1	4	Isoform 5 of Osteopontin [OS=Homo sapiens]
20.9466	16.3004	21.7441	19.858	17.9844	21.8254	19	5	19.7765	2.22442	0.112478	Q99536	VAT1	5	Synaptic vesicle membrane protein VAT-1 homolog [OS=Homo sapiens]
22.6778	22.4644	22.7043	22.4906	16.9228	22.5858	9	1	21.6409	2.31341	0.1069	Q04941	PLP2	6	proteolipid protein 2 [OS=Homo sapiens]
18.6188	25.0182	24.6258	24.7853	24.7717	24.3429	4	16	23.6938	2.49609	0.105348	Q7Z6Z7	HUWE1	7	Isoform 3 of E3 ubiquitin-protein ligase HUWE1 [OS=Homo sapiens]
17.091	22.0359	19.8474	21.8567	22.222	19.1174	5	2	20.3618	2.04983	0.100671	O14773	TPP1	8	Tripeptidyl-peptidase 1 [OS=Homo sapiens]
21.9789	18.0382	19.8612	18.9577	20.0931	23.5347	2	1	20.4106	2.01798	0.0988692	Q8N3Z6	ZCCHC7	9	Zinc finger CCHC domain-containing protein 7 [OS=Homo sapiens]
18.0501	13.8406	17.3781	18.0838	18.3135	17.2746	1	1	17.1568	1.67662	0.0977232	P42226	STAT6	10	Signal transducer and activator of transcription 6 [OS=Homo sapiens]
18.9068	17.65	18.0211	17.6122	14.2722	18.7428	3	2	17.5342	1.68772	0.096253	P02788	LTF	11	Lactotransferrin [OS=Homo sapiens]
19.2428	18.1208	18.4642	14.7899	18.6835	19.6297	21	1	18.1552	1.73538	0.0955863	Q8IZP0	ABI1	12	abl interactor 1 [OS=Homo sapiens]
21.0486	20.3184	17.0345	20.2556	22.762	20.0226	11	5	20.2403	1.86241	0.092015	Q15172	PPP2R5A	13	Serine/threonine-protein phosphatase 2A 56 kDa regulatory subunit alpha isoform [OS=Homo sapiens]
18.3998	21.6896	18.3073	21.9463	21.8152	18.6726	3	4	20.1385	1.84447	0.0915891	P26640	VARS1	14	Valine--tRNA ligase [OS=Homo sapiens]
14.7274	17.3134	14.0259	14.0181	14.7578	13.69	3	3	14.7554	1.32326	0.0896794	O75122	CLASP2	15	CLIP-associating protein 2 [OS=Homo sapiens]
20.5361	16.2827	20.5355	18.9819	20.4433	20.4478	3	1	19.5379	1.70554	0.0872942	Q8NBI5	SLC43A3	16	Solute carrier family 43 member 3 [OS=Homo sapiens]
22.3032	20.8147	17.6486	19.677	18.9981	18.4389	4	5	19.6467	1.6908	0.0860601	P01133	EGF	17	Pro-epidermal growth factor [OS=Homo sapiens]
16.317	17.6004	16.4692	17.5716	16.7769	13.8909	1	1	16.4377	1.36049	0.0827666	Q86V97	KBTBD6	18	kelch repeat and BTB domain-containing protein 6 [OS=Homo sapiens]
15.6756	19.7177	17.5023	19.2185	19.302	18.5438	9	6	18.3266	1.51239	0.0825241	Q12933	TRAF2	19	Isoform 2 of TNF receptor-associated factor 2 [OS=Homo sapiens]
18.5387	18.7588	18.2635	18.6878	14.9472	18.4628	12	3	17.9431	1.47803	0.0823729	Q9Y673	ALG5	20	dolichyl-phosphate beta-glucosyltransferase [OS=Homo sapiens]
24.9519	21.6339	22.2724	22.1438	23.0677	26.5747	2	5	23.4408	1.92645	0.0821836	Q6AHZ1	ZNF518A	21	Zinc finger protein 518A [OS=Homo sapiens]
19.7259	20.1663	19.758	15.9737	19.0356	19.4434	1	1	19.0171	1.53728	0.0808366	P48736	PIK3CG	22	Phosphatidylinositol 4,5-bisphosphate 3-kinase catalytic subunit gamma isoform [OS=Homo sapiens]
20.4973	21.4586	21.0814	21.0682	20.5704	17.0261	28	1	20.2837	1.63534	0.0806234	P14618	PKM	23	Isoform M1 of Pyruvate kinase PKM [OS=Homo sapiens]
19.0157	15.5848	19.6319	19.1659	19.1333	18.859	2	2	18.5651	1.48278	0.0798694	Q13619	CUL4A	24	cullin-4A [OS=Homo sapiens]
20.4367	20.3046	20.563	16.8483	18.526	20.6008	7	3	19.5466	1.53843	0.0787059	P08559	PDHA1	25	Isoform 4 of Pyruvate dehydrogenase E1 component subunit alpha, somatic form, mitochondrial [OS=Homo sapiens]
18.4456	21.8873	18.6253	21.1239	18.7182	18.5126	5	1	19.5522	1.53511	0.0785136	P28676	GCA	26	Grancalcin [OS=Homo sapiens]
27.1104	23.1415	27.0041	23.8527	23.5741	23.0452	25	10	24.6213	1.90969	0.0775625	P07358	C8B	27	Complement component C8 beta chain [OS=Homo sapiens]
19.0564	18.6378	19.911	18.5654	18.2183	15.7257	9	2	18.3525	1.41202	0.0769391	Q92572	AP3S1	28	AP-3 complex subunit sigma-1 [OS=Homo sapiens]
22.4756	22.5122	22.3838	25.82	26.1562	22.5213	32	4	23.6449	1.81884	0.0769231	P13501	CCL5	29	C-C motif chemokine 5 [OS=Homo sapiens]
25.5688	26.356	22.634	22.644	25.7199	22.3004	11	23	24.2038	1.86087	0.0768832	Q14643	ITPR1	30	Isoform 3 of Inositol 1,4,5-trisphosphate receptor type 1 [OS=Homo sapiens]
20.143	20.7014	20.1319	20.176	20.125	16.6249	1	1	19.6503	1.49894	0.0762807	P28799	GRN	31	Granulins [OS=Homo sapiens]
19.5214	18.1827	19.1161	16.403	20.1163	20.1619	13	4	18.9169	1.43195	0.0756967	Q92890	UFD1	32	Isoform Long of Ubiquitin recognition factor in ER-associated degradation protein 1 [OS=Homo sapiens]
21.3061	22.0608	19.9665	19.3609	19.2743	17.9015	8	2	19.9784	1.50266	0.0752143	Q16270	IGFBP7	33	Insulin-like growth factor-binding protein 7 [OS=Homo sapiens]
19.9032	17.2247	19.2022	16.672	19.3439	19.9147	2	1	18.7101	1.40561	0.0751259	P15291	B4GALT1	34	Beta-1,4-galactosyltransferase 1 [OS=Homo sapiens]
22.7489	22.7125	25.5011	27.0495	22.8393	24.168	19	6	24.1699	1.78763	0.0739611	Q9NP79	VTA1	35	Vacuolar protein sorting-associated protein VTA1 homolog [OS=Homo sapiens]
18.2102	21.7273	19.6848	21.6806	21.8774	21.5838	11	8	20.794	1.50737	0.0724907	Q96SB3	PPP1R9B	36	Neurabin-2 [OS=Homo sapiens]
19.9593	22.2392	20.8811	21.147	19.649	17.9661	14	2	20.307	1.46985	0.0723816	A0A075B6I9	IGLV7-46	37	Immunoglobulin lambda variable 7-46 [OS=Homo sapiens]
18.9685	19.8712	19.6389	19.745	19.4478	16.2704	2	3	18.9903	1.36923	0.0721016	O15067	PFAS	38	Phosphoribosylformylglycinamidine synthase [OS=Homo sapiens]
19.1646	19.6775	19.493	19.3581	16.1504	19.404	2	1	18.8746	1.34509	0.0712645	Q96QS1	TSPAN32	39	Tetraspanin-32 [OS=Homo sapiens]
19.2606	17.5665	17.5868	17.1489	17.5134	20.4015	6	4	18.2463	1.28937	0.0706646	P47897	QARS1	40	glutamine--tRNA ligase [OS=Homo sapiens]
21.4551	17.8923	20.947	20.4016	20.5923	22.1301	1	1	20.5697	1.45315	0.0706452	Q49MG5	MAP9	41	Microtubule-associated protein 9 [OS=Homo sapiens]
23.9436	21.9152	21.997	21.9872	22.4922	25.935	4	3	23.045	1.60988	0.0698579	Q9Y263	PLAA	42	Phospholipase A-2-activating protein [OS=Homo sapiens]
17.6749	15.2563	18.2277	16.4404	17.905	18.2215	1	1	17.2876	1.19424	0.0690806	Q8NBR6	MINDY2	43	Ubiquitin carboxyl-terminal hydrolase MINDY-2 [OS=Homo sapiens]
19.2313	20.0017	18.8238	16.2618	19.1504	19.232	5	5	18.7835	1.29465	0.0689249	Q0VD83	APOBR	44	Apolipoprotein B receptor [OS=Homo sapiens]
16.8458	19.8823	19.2963	18.5956	20.1766	20.3907	3	1	19.1979	1.32319	0.0689235	Q9UPZ9	CILK1	45	Serine/threonine-protein kinase ICK [OS=Homo sapiens]
23.2023	23.3677	24.3076	23.655	23.6263	19.8607	14	3	23.0033	1.58507	0.0689064	P29972	AQP1	46	aquaporin-1 [OS=Homo sapiens]
23.1493	24.3312	22.9072	22.6637	21.1187	20.0552	11	2	22.3709	1.53311	0.0685317	P10153	RNASE2	47	Non-secretory ribonuclease [OS=Homo sapiens]
18.8438	16.9776	18.8517	16.1471	18.1671	19.3018	9	10	18.0482	1.23489	0.0684217	Q00722	PLCB2	48	1-phosphatidylinositol 4,5-bisphosphate phosphodiesterase beta-2 [OS=Homo sapiens]
18.4945	15.6915	17.7063	15.5373	16.8722	17.3635	2	1	16.9442	1.15879	0.0683885	Q8NEZ2	VPS37A	49	Vacuolar protein sorting-associated protein 37A [OS=Homo sapiens]
19.6702	19.6444	19.7475	18.9343	18.2305	16.4832	1	1	18.785	1.27094	0.0676572	Q9ULH0	KIDINS220	50	Kinase D-interacting substrate of 220 kDa [OS=Homo sapiens]
22.6882	19.6753	22.2068	20.4351	22.2548	23.5844	7	4	21.8074	1.46443	0.0671528	Q9Y259	CHKB	51	Choline/ethanolamine kinase [OS=Homo sapiens]
20.5452	22.123	21.0112	21.8989	21.314	18.254	2	1	20.8577	1.39958	0.0671013	P23352	ANOS1	52	Anosmin-1 [OS=Homo sapiens]
17.2811	18.7718	18.5192	18.7184	21.1677	18.7486	1	1	18.8678	1.26287	0.0669328	Q9UPV9	TRAK1	53	Trafficking kinesin-binding protein 1 [OS=Homo sapiens]
19.8608	17.1917	19.8766	20.7808	20.7288	19.9921	4	3	19.7385	1.31544	0.0666434	Q9BVG8	KIFC3	54	Kinesin-like protein KIFC3 [OS=Homo sapiens]
25.0887	22.4539	22.7329	22.2074	22.8874	25.9071	6	10	23.5462	1.5514	0.0658876	Q14571	ITPR2	55	Inositol 1,4,5-trisphosphate receptor type 2 [OS=Homo sapiens]
19.2672	18.871	18.7301	18.9043	15.9753	18.7731	4	2	18.4202	1.21272	0.0658363	Q9Y2T2	AP3M1	56	ap-3 complex subunit mu-1 [OS=Homo sapiens]
15.7052	13.6536	14.2494	13.9372	15.5345	15.806	2	1	14.8143	0.972798	0.0656661	Q86TX2	ACOT1	57	acyl-coenzyme A thioesterase 1 [OS=Homo sapiens]
19.546	18.838	18.9927	19.2354	19.4328	16.3007	3	1	18.7243	1.21633	0.0649601	P48307	TFPI2	58	Tissue factor pathway inhibitor 2 [OS=Homo sapiens]
21.6958	19.6864	18.2652	18.848	19.121	18.4592	7	4	19.3459	1.25623	0.064935	P08473	MME	59	Neprilysin [OS=Homo sapiens]
19.4267	16.7957	19.2499	19.753	20.0229	20.1813	3	4	19.2383	1.24674	0.0648054	Q92835	INPP5D	60	Phosphatidylinositol 3,4,5-trisphosphate 5-phosphatase 1 [OS=Homo sapiens]
19.593	21.1161	19.49	20.0438	20.1111	17.2974	5	2	19.6086	1.27046	0.0647912	P00742	F10	61	Coagulation factor X [OS=Homo sapiens]
17.1429	19.7681	19.0262	20.251	20.3007	18.3903	0	1	19.1465	1.22792	0.064133	Q9NZJ4	SACS	62	Sacsin [OS=Homo sapiens]
20.8044	24.363	20.9279	21.3332	21.1187	20.9266	40	3	21.579	1.37639	0.0637841	Q15836	VAMP3	63	Vesicle-associated membrane protein 3 [OS=Homo sapiens]
19.3909	17.257	18.015	17.3167	17.9762	20.1312	3	2	18.3478	1.16365	0.0634216	O00461	GOLIM4	64	Golgi integral membrane protein 4 [OS=Homo sapiens]
17.4314	15.0868	17.0725	17.3768	18.301	17.5292	5	1	17.133	1.0826	0.0631883	Q8TDH9	BLOC1S5	65	Biogenesis of lysosome-related organelles complex 1 subunit 5 [OS=Homo sapiens]
16.3857	19.543	19.2723	18.6782	18.4222	19.3363	8	4	18.6063	1.16827	0.0627888	Q16881	TXNRD1	66	Thioredoxin reductase 1, cytoplasmic [OS=Homo sapiens]
16.9038	18.6558	17.9757	17.5668	17.3015	15.465	3	1	17.3114	1.08528	0.0626918	P45985	MAP2K4	67	Dual specificity mitogen-activated protein kinase kinase 4 [OS=Homo sapiens]
19.0191	19.9721	18.8439	18.1413	16.4941	18.5972	7	3	18.5113	1.15895	0.0626077	Q658P3	STEAP3	68	Metalloreductase STEAP3 [OS=Homo sapiens]
14.8536	15.3104	14.7069	15.1197	14.9719	17.2447	7	1	15.3678	0.942925	0.061357	Q9Y5J6	TIMM10B	69	Mitochondrial import inner membrane translocase subunit Tim10 B [OS=Homo sapiens]
24.4854	21.263	21.0992	21.3108	21.4703	21.1206	14	16	21.7915	1.32668	0.0608807	O00203	AP3B1	70	AP-3 complex subunit beta-1 [OS=Homo sapiens]
19.1759	19.7565	18.4322	16.6353	19.5761	18.9846	7	5	18.7601	1.14057	0.0607976	Q8TCJ2	STT3B	71	Dolichyl-diphosphooligosaccharide--protein glycosyltransferase subunit STT3B [OS=Homo sapiens]
16.3891	18.9566	16.4619	16.7762	17.0743	16.1356	1	1	16.9656	1.02829	0.06061	Q9BTW9	TBCD	72	Tubulin-specific chaperone D [OS=Homo sapiens]
20.9497	20.8394	20.9377	17.9148	21.1728	20.6788	15	2	20.4155	1.23565	0.0605249	Q15056	EIF4H	73	Eukaryotic translation initiation factor 4H [OS=Homo sapiens]
19.8743	22.8257	22.6985	20.455	20.4407	22.0402	13	7	21.3891	1.28599	0.0601238	Q9H9C1	VIPAS39	74	Spermatogenesis-defective protein 39 homolog [OS=Homo sapiens]
22.0122	20.5422	21.4141	21.2527	21.4978	24.2918	8	2	21.8351	1.29372	0.0592495	O96011	PEX11B	75	Peroxisomal membrane protein 11B [OS=Homo sapiens]
19.7068	22.6273	21.6897	22.9411	22.7319	20.7716	36	4	21.7447	1.28748	0.0592087	Q6GMV3	PTRHD1	76	Putative peptidyl-tRNA hydrolase PTRHD1 [OS=Homo sapiens]
17.2851	17.0321	19.4133	17.2703	19.1372	18.6886	2	2	18.1378	1.06124	0.0585098	Q9UPN4	CEP131	77	centrosomal protein of 131 kDa [OS=Homo sapiens]
21.6716	23.8661	21.5469	23.9522	24.3297	21.8357	32	6	22.8671	1.30771	0.0571876	P07741	APRT	78	Adenine phosphoribosyltransferase [OS=Homo sapiens]
23.6489	21.4396	20.5019	22.0023	21.8179	20.208	15	2	21.6031	1.23098	0.0569815	P24534	EEF1B2	79	Elongation factor 1-beta [OS=Homo sapiens]
15.0245	16.4534	15.6451	15.5234	16.2389	17.6184	2	1	16.0839	0.910416	0.056604	Q96FS4	SIPA1	80	signal-induced proliferation-associated protein 1 [OS=Homo sapiens]
20.564	20.3858	20.2519	20.0169	19.896	17.5487	3	1	19.7772	1.11829	0.0565444	Q8IXJ6	SIRT2	81	NAD-dependent protein deacetylase sirtuin-2 [OS=Homo sapiens]
19.3898	17.1573	20.0657	20.1052	19.4786	19.3485	29	3	19.2575	1.08234	0.0562037	P60520	GABARAPL2	82	Gamma-aminobutyric acid receptor-associated protein-like 2 [OS=Homo sapiens]
17.9593	20.7736	20.7457	20.5364	20.8635	20.7384	9	3	20.2695	1.1368	0.0560845	P51665	PSMD7	83	26S proteasome non-ATPase regulatory subunit 7 [OS=Homo sapiens]
21.1117	22.6849	22.577	23.1825	23.2162	20.1934	34	3	22.161	1.231	0.0555482	P82909	MRPS36	84	28S ribosomal protein S36, mitochondrial [OS=Homo sapiens]
24.6801	21.525	24.7806	24.7268	25.0194	24.846	34	7	24.263	1.34653	0.0554975	Q8N128	FAM177A1	85	Protein FAM177A1 [OS=Homo sapiens]
17.9273	16.9392	16.2734	16.1272	15.8945	18.0206	4	1	16.8637	0.927958	0.0550269	Q5TC84	OGFRL1	86	Opioid growth factor receptor-like protein 1 [OS=Homo sapiens]
17.8638	17.7087	15.6854	16.3465	17.8675	17.6861	4	1	17.193	0.938459	0.0545838	P08311	CTSG	87	Cathepsin G [OS=Homo sapiens]
19.4952	19.8723	21.3708	19.2515	18.1388	20.1581	30	7	19.7145	1.06869	0.0542086	O95571	ETHE1	88	Persulfide dioxygenase ETHE1, mitochondrial [OS=Homo sapiens]
16.738	18.5458	16.1535	18.0479	18.2623	17.1506	3	4	17.483	0.947527	0.0541971	O00159	MYO1C	89	Unconventional myosin-Ic [OS=Homo sapiens]
22.8725	19.9439	20.3548	20.1797	20.0945	20.2348	19	7	20.6133	1.11528	0.0541047	Q8N1N4	KRT78	90	Keratin, type II cytoskeletal 78 [OS=Homo sapiens]
16.4022	14.8133	15.7565	15.2785	16.4717	17.1626	5	5	15.9808	0.862754	0.0539869	P78344	EIF4G2	91	Eukaryotic translation initiation factor 4 gamma 2 [OS=Homo sapiens]
25.9887	22.695	25.8673	26.0524	26.3206	25.9252	22	4	25.4748	1.37093	0.0538151	P00492	HPRT1	92	Hypoxanthine-guanine phosphoribosyltransferase [OS=Homo sapiens]
19.3968	20.6612	19.7918	20.9212	22.2387	19.439	4	1	20.4081	1.09731	0.0537682	Q9Y315	DERA	93	deoxyribose-phosphate aldolase [OS=Homo sapiens]
22.4238	24.2152	22.5906	24.7853	25.2198	22.5225	16	6	23.6262	1.26224	0.0534255	P00740	F9	94	Coagulation factor IX [OS=Homo sapiens]
19.1084	18.0462	19.4696	19.5982	18.6269	17.0397	11	7	18.6482	0.973565	0.052207	P03951	F11	95	Coagulation factor XI [OS=Homo sapiens]
20.7224	20.3222	19.0411	20.091	20.8988	18.2644	5	6	19.89	1.02966	0.0517678	Q99683	MAP3K5	96	Mitogen-activated protein kinase kinase kinase 5 [OS=Homo sapiens]
18.6819	20.284	19.2101	19.9644	19.6881	17.5619	4	1	19.2317	0.994314	0.0517017	P49914	MTHFS	97	5-formyltetrahydrofolate cyclo-ligase [OS=Homo sapiens]
18.5849	17.8294	17.9555	19.3034	20.4377	18.9593	3	3	18.845	0.964388	0.0511747	Q14764	MVP	98	major vault protein [OS=Homo sapiens]
16.8244	16.0336	16.931	17.9416	18.2503	16.3955	1	1	17.0627	0.867307	0.0508305	P08183	ABCB1	99	multidrug resistance protein 1 [OS=Homo sapiens]
21.8398	24.6408	23.8793	24.4837	24.6652	22.5648	0	4	23.679	1.20077	0.0507106	Q8NF91	SYNE1	100	Isoform 7 of Nesprin-1 [OS=Homo sapiens]
18.4547	16.3514	18.3514	18.3229	18.0331	19.0453	14	4	18.0931	0.915883	0.0506205	Q96A49	SYAP1	101	Synapse-associated protein 1 [OS=Homo sapiens]
17.6655	18.8263	17.9396	18.7611	18.4604	16.4196	12	5	18.0121	0.904027	0.0501901	Q9H0X4	FAM234A	102	Protein FAM234A [OS=Homo sapiens]
19.6978	18.1983	18.5389	17.8836	18.9359	20.3913	7	5	18.9409	0.949471	0.050128	O14639	ABLIM1	103	Isoform 6 of Actin-binding LIM protein 1 [OS=Homo sapiens]
18.3702	20.7764	20.0913	20.8145	19.9729	18.9772	8	9	19.8337	0.98099	0.0494606	Q6VY07	PACS1	104	Phosphofurin acidic cluster sorting protein 1 [OS=Homo sapiens]
22.6238	24.0345	22.733	24.9015	25.1214	22.6236	9	4	23.673	1.1682	0.0493476	P53634	CTSC	105	Dipeptidyl peptidase 1 [OS=Homo sapiens]
20.5135	22.9887	20.6239	21.7317	20.2217	21.0388	16	3	21.1864	1.02638	0.0484454	P61086	UBE2K	106	Ubiquitin-conjugating enzyme E2 K [OS=Homo sapiens]
21.3889	19.0592	21.4878	20.6068	21.6065	21.5965	19	2	20.9576	1.00232	0.047826	Q8WUH6	TMEM263	107	Transmembrane protein 263 [OS=Homo sapiens]
21.9976	22.5597	22.2947	22.2448	22.5972	19.8393	17	6	21.9222	1.04393	0.0476198	P61201	COPS2	108	COP9 signalosome complex subunit 2 [OS=Homo sapiens]
17.8649	19.6331	19.4013	18.5178	19.233	17.4482	4	3	18.683	0.887953	0.0475272	Q32P44	EML3	109	Echinoderm microtubule-associated protein-like 3 [OS=Homo sapiens]
19.2751	20.1243	19.9429	20.8467	20.5972	18.3353	14	3	19.8536	0.923081	0.0464944	O15126	SCAMP1	110	Secretory carrier-associated membrane protein 1 [OS=Homo sapiens]
23.4143	21.2952	22.1291	21.1506	22.8402	23.5587	4	3	22.398	1.04116	0.0464847	Q6P1M0	SLC27A4	111	Long-chain fatty acid transport protein 4 [OS=Homo sapiens]
20.3163	18.1244	20.167	19.5672	20.1453	20.7316	0	1	19.842	0.920836	0.0464085	Q99698	LYST	112	Lysosomal-trafficking regulator [OS=Homo sapiens]
18.5701	18.6213	18.3676	18.2803	18.0669	16.3989	5	2	18.0509	0.833921	0.0461984	O95433	AHSA1	113	activator of 90 kDa heat shock protein ATPase homolog 1 [OS=Homo sapiens]
18.2425	18.3624	18.403	18.2174	16.2771	18.2397	5	3	17.957	0.826403	0.0460211	O43776	NARS1	114	Asparagine--tRNA ligase, cytoplasmic [OS=Homo sapiens]
22.1635	19.7213	21.3379	20.2743	21.6287	21.9449	15	2	21.1784	0.972274	0.0459087	A0A0C4DH34	IGHV4-28	115	immunoglobulin heavy variable 4-28 [OS=Homo sapiens]
26.4806	23.8925	25.7894	24.447	25.5949	26.9553	26	10	25.5266	1.1714	0.0458895	Q14254	FLOT2	116	Flotillin-2 [OS=Homo sapiens]
19.64	20.5667	20.2944	20.3837	20.4841	18.2094	17	2	19.9297	0.905053	0.0454122	L0R6Q1	SLC35A4	117	SLC35A4 upstream open reading frame protein [OS=Homo sapiens]
16.4907	18.771	18.188	18.4478	18.5542	18.1179	1	1	18.0949	0.821608	0.0454054	Q9H8L6	MMRN2	118	Multimerin-2 [OS=Homo sapiens]
19.1556	19.7844	19.5893	17.3742	18.7126	18.9994	3	4	18.9359	0.858837	0.045355	Q9NZM3	ITSN2	119	Isoform 4 of Intersectin-2 [OS=Homo sapiens]
24.0852	22.7869	22.8871	22.5527	22.9041	25.2864	14	5	23.4171	1.06104	0.0453105	Q99952	PTPN18	120	Tyrosine-protein phosphatase non-receptor type 18 [OS=Homo sapiens]
17.9376	18.1775	19.566	18.1564	19.8139	18.0318	2	6	18.6139	0.841709	0.0452195	Q4LDE5	SVEP1	121	Sushi, von Willebrand factor type A, EGF and pentraxin domain-containing protein 1 [OS=Homo sapiens]
20.4718	21.4289	20.8802	22.0608	23.2351	21.3893	1	1	21.5777	0.974407	0.0451581	P22735	TGM1	122	Protein-glutamine gamma-glutamyltransferase K [OS=Homo sapiens]
19.1074	21.1919	21.0026	19.671	19.6161	19.239	3	2	19.9713	0.900247	0.045077	Q6ZSS7	MFSD6	123	Major facilitator superfamily domain-containing protein 6 [OS=Homo sapiens]
19.1477	19.2086	19.8167	20.128	19.4542	17.6435	33	3	19.2331	0.863157	0.0448787	O14548	COX7A2L	124	Cytochrome c oxidase subunit 7A-related protein, mitochondrial [OS=Homo sapiens]
20.4622	20.5394	19.0455	18.8421	18.6686	20.3167	14	6	19.6458	0.880481	0.0448179	O94925	GLS	125	Isoform 3 of Glutaminase kidney isoform, mitochondrial [OS=Homo sapiens]
19.2085	18.7343	20.1764	20.8583	20.9747	19.7735	18	4	19.9543	0.892752	0.0447399	Q9Y385	UBE2J1	126	ubiquitin-conjugating enzyme e2 j1 [OS=Homo sapiens]
15.6104	17.0258	16.9072	16.0949	15.4147	15.5014	2	1	16.0924	0.717795	0.0446046	Q9H0B8	CRISPLD2	127	Cysteine-rich secretory protein LCCL domain-containing 2 [OS=Homo sapiens]
20.8672	19.6328	20.2976	18.915	18.6564	18.9983	11	6	19.5612	0.872485	0.0446028	P12109	COL6A1	128	Collagen alpha-1(VI) chain [OS=Homo sapiens]
21.1028	21.9662	22.5464	21.3891	23.6327	21.2115	19	4	21.9748	0.975867	0.0444085	P51970	NDUFA8	129	NADH dehydrogenase [ubiquinone] 1 alpha subcomplex subunit 8 [OS=Homo sapiens]
19.4239	19.6016	19.5039	19.3459	17.369	19.1513	2	1	19.0659	0.845224	0.0443316	P51570	GALK1	130	galactokinase [OS=Homo sapiens]
25.7144	25.0539	23.7149	23.3598	23.6698	25.7395	26	3	24.542	1.08749	0.0443112	Q562R1	ACTBL2	131	Beta-actin-like protein 2 [OS=Homo sapiens]
19.5146	21.4664	21.1483	21.3775	21.21	19.6015	46	5	20.7197	0.907409	0.0437945	P14927	UQCRB	132	Cytochrome b-c1 complex subunit 7 [OS=Homo sapiens]
20.9796	19.5435	19.341	19.1009	20.7498	20.9815	30	7	20.116	0.878115	0.0436525	O95721	SNAP29	133	Synaptosomal-associated protein 29 [OS=Homo sapiens]
18.6949	19.051	19.72	20.5896	18.1983	19.1747	18	2	19.2381	0.833554	0.0433284	A0A0C4DH67	IGKV1-8	134	immunoglobulin kappa variable 1-8 [OS=Homo sapiens]
20.3882	22.5415	21.9953	22.6732	22.5559	21.0435	7	17	21.8663	0.944537	0.0431961	Q6ZNJ1	NBEAL2	135	Neurobeachin-like protein 2 [OS=Homo sapiens]
22.0143	20.4702	20.3843	20.2758	20.391	22.226	20	3	20.9603	0.903051	0.043084	Q9Y2B0	CNPY2	136	Protein canopy homolog 2 [OS=Homo sapiens]
21.2355	21.3256	21.4531	19.5177	21.4877	19.8035	15	3	20.8039	0.894721	0.0430075	P36543	ATP6V1E1	137	V-type proton ATPase subunit E 1 [OS=Homo sapiens]
17.4388	18.1116	18.9161	18.1028	19.5164	19.2407	10	4	18.5544	0.796487	0.0429271	P00352	ALDH1A1	138	Retinal dehydrogenase 1 [OS=Homo sapiens]
19.5158	19.1855	19.2919	17.291	18.8893	19.1797	8	1	18.8922	0.810089	0.0428795	P10124	SRGN	139	Serglycin [OS=Homo sapiens]
20.9871	19.4655	19.6673	21.3416	21.1369	21.4758	10	4	20.679	0.880292	0.0425693	O15533	TAPBP	140	Tapasin [OS=Homo sapiens]
22.0797	22.5182	21.7896	23.0867	24.4349	22.2029	15	9	22.6853	0.964572	0.0425197	Q13131	PRKAA1	141	5'-AMP-activated protein kinase catalytic subunit alpha-1 [OS=Homo sapiens]
18.6718	19.1177	19.4284	17.1866	18.3353	18.2854	8	1	18.5042	0.783702	0.0423527	Q9BQB6	VKORC1	142	vitamin K epoxide reductase complex subunit 1 [OS=Homo sapiens]
23.1147	24.882	22.1705	22.7515	22.5288	22.5697	30	11	23.0029	0.970782	0.0422026	Q12907	LMAN2	143	Vesicular integral-membrane protein VIP36 [OS=Homo sapiens]
19.3007	18.2623	20.6575	19.9918	19.7123	20.162	14	7	19.6811	0.829449	0.0421444	Q9UHG3	PCYOX1	144	prenylcysteine oxidase 1 [OS=Homo sapiens]
19.1815	20.7686	19.0508	20.8018	19.5066	19.0985	16	4	19.7346	0.829228	0.0420189	Q9HCN8	SDF2L1	145	Stromal cell-derived factor 2-like protein 1 [OS=Homo sapiens]
18.0362	18.9256	18.6879	18.7262	18.9753	16.9682	3	2	18.3866	0.771734	0.0419727	Q9NW68	BSDC1	146	Isoform 2 of BSD domain-containing protein 1 [OS=Homo sapiens]
23.5597	23.4281	23.2827	23.611	24.3015	21.4167	5	2	23.2666	0.972022	0.0417776	Q9NWW5	CLN6	147	ceroid-lipofuscinosis neuronal protein 6 [OS=Homo sapiens]
20.7759	19.7673	21.396	19.2703	21.1937	21.0428	10	4	20.5743	0.856823	0.0416453	P54922	ADPRH	148	[Protein ADP-ribosylarginine] hydrolase [OS=Homo sapiens]
19.3356	19.3882	21.0479	20.7421	19.1405	19.4391	10	4	19.8489	0.822284	0.0414272	P53582	METAP1	149	Methionine aminopeptidase 1 [OS=Homo sapiens]
15.9645	17.5502	15.9042	15.9217	16.4802	15.7858	1	1	16.2678	0.673189	0.0413818	Q8N5I2	ARRDC1	150	arrestin domain-containing protein 1 [OS=Homo sapiens]
19.2707	18.1757	18.4022	18.4694	18.6731	20.2696	1	1	18.8768	0.777094	0.0411667	Q969S3	ZNF622	151	Zinc finger protein 622 [OS=Homo sapiens]
20.3281	21.0234	20.8786	19.3758	19.11	20.8842	12	3	20.2667	0.832306	0.0410677	Q9NZ43	USE1	152	Vesicle transport protein USE1 [OS=Homo sapiens]
20.4	18.2752	19.6052	19.764	20.4322	20.1829	15	9	19.7766	0.808375	0.0408753	P54136	RARS1	153	arginine--tRNA ligase, cytoplasmic [OS=Homo sapiens]
19.399	18.0049	17.581	17.3088	17.728	17.8787	13	2	17.9834	0.734495	0.0408429	P07498	CSN3	154	kappa-casein [OS=Homo sapiens]
23.1289	24.8732	23.7401	24.474	24.8134	22.4735	17	12	23.9172	0.976146	0.0408136	P46459	NSF	155	Vesicle-fusing ATPase [OS=Homo sapiens]
19.701	19.1199	19.7111	18.4823	20.6567	20.3872	4	6	19.6764	0.800442	0.0406804	O60449	LY75	156	Lymphocyte antigen 75 [OS=Homo sapiens]
20.4676	19.5138	18.4992	20.5574	20.4834	20.2006	15	8	19.9537	0.809829	0.0405855	P21281	ATP6V1B2	157	V-type proton ATPase subunit B, brain isoform [OS=Homo sapiens]
16.985	17.2642	15.8179	16.2043	17.5443	16.3079	5	7	16.6873	0.676615	0.0405468	Q9HBL0	TNS1	158	Tensin-1 [OS=Homo sapiens]
19.653	19.4286	20.8059	20.8851	19.0204	20.72	48	3	20.0855	0.814138	0.0405336	A0A0B4J1Y9	IGHV3-72	159	immunoglobulin heavy variable 3-72 [OS=Homo sapiens]
16.7521	18.1096	17.0835	17.9002	17.845	16.3971	1	1	17.3479	0.701627	0.0404445	O95155	UBE4B	160	Isoform 3 of Ubiquitin conjugation factor E4 B [OS=Homo sapiens]
18.6225	20.76	19.0922	19.4207	20.3441	19.8356	3	3	19.6792	0.795323	0.0404145	Q9Y6Y8	SEC23IP	161	SEC23-interacting protein [OS=Homo sapiens]
19.6228	21.7395	20.5586	21.1686	21.9586	21.1414	23	4	21.0316	0.848476	0.0403429	Q15762	CD226	162	CD226 antigen [OS=Homo sapiens]
22.0715	20.191	21.587	20.2003	21.4387	22.0351	15	3	21.254	0.856007	0.0402752	Q13445	TMED1	163	Transmembrane emp24 domain-containing protein 1 [OS=Homo sapiens]
20.4713	22.27	20.6514	21.5293	21.5719	19.9958	27	3	21.0816	0.847293	0.0401911	Q9Y2R0	COA3	164	Cytochrome c oxidase assembly factor 3 homolog, mitochondrial [OS=Homo sapiens]
19.7433	19.775	19.5227	18.2612	19.0931	18.0857	6	5	19.0802	0.745398	0.0390667	P20810	CAST	165	Calpastatin [OS=Homo sapiens]
23.8447	22.9552	22.2986	22.0849	21.261	22.1876	23	2	22.4387	0.876178	0.0390477	Q8WUW1	BRK1	166	Protein BRICK1 [OS=Homo sapiens]
21.9769	22.8024	20.8217	22.191	22.4762	23.3803	22	2	22.2747	0.865834	0.0388706	Q3ZAQ7	VMA21	167	Vacuolar ATPase assembly integral membrane protein vma21 [OS=Homo sapiens]
22.0463	20.3529	20.3516	21.9871	22.017	21.7566	26	3	21.4186	0.832319	0.0388597	O95182	NDUFA7	168	NADH dehydrogenase [ubiquinone] 1 alpha subcomplex subunit 7 [OS=Homo sapiens]
18.8418	19.1151	17.367	19.2873	19.2226	19.0852	15	2	18.8198	0.727942	0.0386795	Q8N5H3	FAM89B	169	Isoform 1 of Leucine repeat adapter protein 25 [OS=Homo sapiens]
19.932	19.8575	18.5358	18.9571	19.025	18.0468	3	1	19.059	0.736155	0.038625	Q15118	PDK1	170	[Pyruvate dehydrogenase (Acetyl-transferring)] kinase isozyme 1, mitochondrial [OS=Homo sapiens]
18.2332	19.5149	19.1681	19.5299	19.0917	17.7482	10	7	18.881	0.728351	0.0385759	O95140	MFN2	171	Mitofusin-2 [OS=Homo sapiens]
22.0178	22.0764	22.1457	20.224	21.9085	22.6985	12	7	21.8451	0.840687	0.0384839	P23588	EIF4B	172	eukaryotic translation initiation factor 4B [OS=Homo sapiens]
18.9468	17.385	18.9621	19.3387	19.0726	19.24	11	6	18.8242	0.721747	0.0383414	Q8TAT6	NPLOC4	173	Nuclear protein localization protein 4 homolog [OS=Homo sapiens]
20.6803	20.588	20.5563	21.4044	22.5559	20.5424	11	3	21.0545	0.805555	0.0382604	Q86X76	NIT1	174	Deaminated glutathione amidase [OS=Homo sapiens]
19.5217	18.941	19.7281	19.2551	17.7778	19.646	7	6	19.145	0.728833	0.0380692	Q9Y4E8	USP15	175	ubiquitin carboxyl-terminal hydrolase 15 [OS=Homo sapiens]
20.5532	21.2516	19.4709	19.2173	20.5149	20.6104	4	2	20.2697	0.770255	0.0380003	Q9UHY1	NRBP1	176	Nuclear receptor-binding protein [OS=Homo sapiens]
22.1347	20.1951	21.5781	20.53	21.5118	22.1119	9	3	21.3436	0.809979	0.0379495	O75323	NIPSNAP2	177	Protein NipSnap homolog 2 [OS=Homo sapiens]
18.55	19.1188	18.2467	19.0549	17.4231	19.3041	10	2	18.6163	0.704666	0.0378522	O15258	RER1	178	Protein RER1 [OS=Homo sapiens]
19.5233	17.522	18.3159	18.5204	19.0662	19.0165	2	1	18.6607	0.702891	0.0376669	P05067	APP	179	Amyloid-beta A4 protein [OS=Homo sapiens]
20.996	19.6845	19.7628	20.5868	21.6239	21.1125	13	6	20.6278	0.77492	0.0375669	Q13510	ASAH1	180	Acid ceramidase [OS=Homo sapiens]
16.8218	17.9911	17.091	17.3535	17.0491	16.0444	2	1	17.0585	0.639123	0.0374666	Q7Z7A4	PXK	181	PX domain-containing protein kinase-like protein [OS=Homo sapiens]
23.6961	22.5455	23.5876	21.9381	24.1187	22.447	27	4	23.0555	0.86057	0.037326	P09972	ALDOC	182	Fructose-bisphosphate aldolase C [OS=Homo sapiens]
20.4087	19.7386	19.7787	19.5843	20.5444	18.4764	7	3	19.7552	0.736938	0.0373036	Q9UEW8	STK39	183	STE20/SPS1-related proline-alanine-rich protein kinase [OS=Homo sapiens]
18.4532	18.4047	17.5926	18.238	18.0803	19.6445	3	3	18.4022	0.682918	0.0371106	Q12959	DLG1	184	Disks large homolog 1 [OS=Homo sapiens]
21.4847	21.7709	21.4953	22.2457	23.5977	21.6152	17	5	22.0349	0.815653	0.0370164	P11177	PDHB	185	Pyruvate dehydrogenase E1 component subunit beta, mitochondrial [OS=Homo sapiens]
23.4319	21.5274	22.4769	21.8788	22.7317	23.6316	37	3	22.613	0.831649	0.0367775	P61952	GNG11	186	Guanine nucleotide-binding protein G(I)/G(S)/G(O) subunit gamma-11 [OS=Homo sapiens]
25.3732	22.9716	24.5371	23.3905	24.125	24.7396	9	11	24.1895	0.888859	0.0367456	Q9P2E9	RRBP1	187	Ribosome-binding protein 1 [OS=Homo sapiens]
22.3141	20.4986	22.6006	22.5316	22.5599	21.9195	11	6	22.0707	0.810693	0.0367316	P09622	DLD	188	Dihydrolipoyl dehydrogenase, mitochondrial [OS=Homo sapiens]
19.4289	19.2552	21.2319	20.1475	20.5262	19.8258	27	2	20.0693	0.734671	0.0366068	Q9P1F3	ABRACL	189	Costars family protein ABRACL [OS=Homo sapiens]
17.4996	19.3035	18.3769	19.0933	19.2155	18.8251	3	1	18.719	0.684595	0.0365722	Q8NCA5	FAM98A	190	protein FAM98A [OS=Homo sapiens]
18.2044	20.0982	19.549	20.1896	19.7194	19.6595	11	2	19.57	0.715356	0.0365537	P56377	AP1S2	191	AP-1 complex subunit sigma-2 [OS=Homo sapiens]
24.0394	23.4385	25.009	23.5191	23.59	22.3575	27	12	23.6589	0.864166	0.036526	Q7L591	DOK3	192	Docking protein 3 [OS=Homo sapiens]
20.5563	21.46	20.172	20.7741	20.2305	19.2164	2	6	20.4016	0.744262	0.0364807	P42345	MTOR	193	Serine/threonine-protein kinase mTOR [OS=Homo sapiens]
17.4627	18.9501	17.8321	17.0464	17.98	17.5633	1	1	17.8058	0.64711	0.0363427	Q12882	DPYD	194	Dihydropyrimidine dehydrogenase [NADP(+)] [OS=Homo sapiens]
18.3757	20.4322	19.6798	19.7423	19.7829	19.0451	8	4	19.5097	0.708588	0.0363198	O75298	RTN2	195	Reticulon-2 [OS=Homo sapiens]
23.123	21.9713	22.861	21.3742	22.5099	23.6562	43	4	22.5826	0.819934	0.0363082	P14209	CD99	196	CD99 antigen [OS=Homo sapiens]
14.2487	14.7482	13.7388	14.4946	14.7487	13.5284	4	1	14.2512	0.517437	0.0363082	P48454	PPP3CC	197	Serine/threonine-protein phosphatase 2B catalytic subunit gamma isoform [OS=Homo sapiens]
22.2386	20.8908	20.8905	21.3821	20.8744	19.908	3	1	21.0308	0.762455	0.0362543	P57764	GSDMD	198	Gasdermin-D [OS=Homo sapiens]
21.0963	22.9776	21.7778	22.3889	22.1315	20.8869	18	3	21.8765	0.79219	0.0362119	Q969H8	MYDGF	199	Myeloid-derived growth factor [OS=Homo sapiens]
24.3337	22.7683	22.8519	22.6166	24.3542	22.6754	34	10	23.2667	0.838335	0.0360316	Q9Y3F4	STRAP	200	Serine-threonine kinase receptor-associated protein [OS=Homo sapiens]
20.019	21.5241	20.8926	21.3221	20.9937	19.6382	20	2	20.7316	0.744943	0.0359327	P06310	IGKV2-30	201	Immunoglobulin kappa variable 2-30 [OS=Homo sapiens]
20.6857	22.6214	21.4625	21.3005	20.4339	21.5032	3	10	21.3345	0.766037	0.035906	P78509	RELN	202	Reelin [OS=Homo sapiens]
20.0175	20.6413	19.8819	21.1505	19.5432	19.1843	12	4	20.0698	0.720279	0.0358887	Q8IWB7	WDFY1	203	WD repeat and FYVE domain-containing protein 1 [OS=Homo sapiens]
23.3508	23.2113	25.14	23.6985	23.4031	24.9392	53	12	23.9571	0.855739	0.0357196	O43399	TPD52L2	204	Tumor protein D54 [OS=Homo sapiens]
20.0852	19.6729	18.5119	18.9882	20.3508	19.2822	12	5	19.4819	0.689943	0.0354146	P36955	SERPINF1	205	Pigment epithelium-derived factor [OS=Homo sapiens]
21.1945	22.6466	21.3373	22.8636	22.867	22.75	39	3	22.2765	0.788356	0.0353896	P80748	IGLV3-21	206	Immunoglobulin lambda variable 3-21 [OS=Homo sapiens]
19.7221	19.9917	20.5549	20.56	21.3422	21.5799	7	4	20.6251	0.72823	0.0353079	Q8NBM8	PCYOX1L	207	Prenylcysteine oxidase-like [OS=Homo sapiens]
23.0299	24.7396	22.7457	22.4649	22.8393	22.9262	35	2	23.1243	0.814439	0.0352201	Q92930	RAB8B	208	Ras-related protein Rab-8B [OS=Homo sapiens]
19.9987	19.233	19.4253	18.3955	18.8157	20.1668	4	3	19.3391	0.678686	0.0350939	P29122	PCSK6	209	Isoform PACE4C of Proprotein convertase subtilisin/kexin type 6 [OS=Homo sapiens]
20.2002	20.4558	18.9841	19.3716	20.8018	20.3885	16	5	20.0336	0.701677	0.0350249	O94905	ERLIN2	210	Erlin-2 [OS=Homo sapiens]
17.1482	17.7671	17.9294	17.7487	16.2885	17.4348	4	2	17.3861	0.605883	0.0348486	Q9HD26	GOPC	211	Isoform 2 of Golgi-associated PDZ and coiled-coil motif-containing protein [OS=Homo sapiens]
21.2627	20.3301	20.5423	19.9496	19.6367	21.4407	19	11	20.527	0.712884	0.034729	Q13492	PICALM	212	Phosphatidylinositol-binding clathrin assembly protein [OS=Homo sapiens]
22.7529	24.2821	24.1538	24.1517	24.2724	22.5137	24	3	23.6878	0.822165	0.0347084	O60925	PFDN1	213	prefoldin subunit 1 [OS=Homo sapiens]
23.194	21.7265	22.7259	22.2777	22.9473	24.0363	6	4	22.818	0.791719	0.0346972	P61221	ABCE1	214	ATP-binding cassette sub-family E member 1 [OS=Homo sapiens]
21.4516	20.4628	20.3631	21.8603	22.0385	21.8215	12	1	21.333	0.73841	0.0346136	Q9NX55	HYPK	215	Isoform 3 of Huntingtin-interacting protein K [OS=Homo sapiens]
20.5389	19.8587	18.6319	19.8491	20.0127	20.4648	19	8	19.8927	0.685849	0.0344775	P62191	PSMC1	216	26S proteasome regulatory subunit 4 [OS=Homo sapiens]
18.069	19.7245	18.0687	18.6501	18.5827	19.156	2	1	18.7085	0.643439	0.0343929	Q9H1Z4	WDR13	217	WD repeat-containing protein 13 [OS=Homo sapiens]
17.2356	18.5214	19.1598	18.4361	18.5871	18.5005	5	1	18.4067	0.631492	0.0343077	Q8TBP5	FAM174A	218	Membrane protein FAM174A [OS=Homo sapiens]
17.0635	18.4894	17.9045	17.9664	17.9831	16.9112	4	1	17.7197	0.606806	0.0342447	Q96MH2	HEXIM2	219	Protein HEXIM2 [OS=Homo sapiens]
22.5537	23.7054	23.0071	23.1286	22.9951	21.3992	29	11	22.7982	0.77868	0.0341554	O60664	PLIN3	220	Perilipin-3 [OS=Homo sapiens]
21.7142	22.5574	21.0749	22.0813	22.1839	23.3046	39	5	22.1527	0.75507	0.0340848	P09382	LGALS1	221	Galectin-1 [OS=Homo sapiens]
22.5379	23.1583	23.2139	23.3722	23.3875	21.3861	17	5	22.8426	0.778327	0.0340734	P25787	PSMA2	222	Proteasome subunit alpha type-2 [OS=Homo sapiens]
20.6112	20.1632	18.8132	19.8518	19.7037	20.612	8	3	19.9592	0.675702	0.0338542	Q8NBQ5	HSD17B11	223	Estradiol 17-beta-dehydrogenase 11 [OS=Homo sapiens]
17.4932	18.8715	18.9998	18.6715	19.2153	18.2286	10	4	18.58	0.628929	0.0338498	Q9Y6K9	IKBKG	224	Isoform 2 of NF-kappa-B essential modulator [OS=Homo sapiens]
20.6509	20.0338	21.2125	19.7561	21.0142	21.5646	7	2	20.7054	0.699428	0.03378	P08865	RPSA	225	40S ribosomal protein SA [OS=Homo sapiens]
19.5441	18.1096	19.6666	19.4244	19.9844	19.5584	2	1	19.3812	0.651461	0.033613	A1L0T0	ILVBL	226	Acetolactate synthase-like protein [OS=Homo sapiens]
19.5807	19.3265	20.4267	20.7674	19.046	19.62	5	2	19.7945	0.663591	0.033524	Q13564	NAE1	227	Isoform 2 of NEDD8-activating enzyme E1 regulatory subunit [OS=Homo sapiens]
16.4655	15.3087	16.8538	16.5176	16.5977	16.5498	2	1	16.3822	0.543053	0.033149	Q96B97	SH3KBP1	228	SH3 domain-containing kinase-binding protein 1 [OS=Homo sapiens]
21.3481	22.1967	20.608	22.08	22.1675	22.5914	5	4	21.832	0.723326	0.0331315	O14920	IKBKB	229	Inhibitor of nuclear factor kappa-B kinase subunit beta [OS=Homo sapiens]
21.1732	21.6428	21.0466	22.0314	21.0292	19.9646	20	5	21.148	0.700106	0.0331051	P35625	TIMP3	230	Metalloproteinase inhibitor 3 [OS=Homo sapiens]
21.6532	19.8837	21.1757	21.3193	21.8307	21.5395	16	3	21.2337	0.701307	0.033028	Q8N5K1	CISD2	231	CDGSH iron-sulfur domain-containing protein 2 [OS=Homo sapiens]
20.0764	19.2005	19.2299	18.8553	20.1247	20.4712	44	2	19.6597	0.646679	0.0328937	P02538	KRT6A	232	Keratin, type II cytoskeletal 6A [OS=Homo sapiens]
21.1094	20.9013	19.269	20.7843	20.4028	20.912	8	4	20.5631	0.675859	0.0328675	Q9BXR6	CFHR5	233	Complement factor H-related protein 5 [OS=Homo sapiens]
22.0133	20.4241	22.1973	20.8589	20.8956	21.2334	18	2	21.2704	0.698356	0.0328323	P0DMM9	SULT1A3	234	Sulfotransferase 1A3 [OS=Homo sapiens]
25.1143	26.5084	26.489	26.2421	24.6482	24.9719	45	9	25.6623	0.841523	0.0327922	P30405	PPIF	235	Peptidyl-prolyl cis-trans isomerase F, mitochondrial [OS=Homo sapiens]
21.7304	21.6628	21.9266	23.2459	21.6015	21.134	16	3	21.8836	0.71714	0.0327707	Q9BVK6	TMED9	236	Transmembrane emp24 domain-containing protein 9 [OS=Homo sapiens]
19.3228	18.3034	19.7818	18.2377	19.2574	19.3181	3	3	19.0369	0.623074	0.0327298	Q8IWB9	TEX2	237	Testis-expressed protein 2 [OS=Homo sapiens]
17.7435	18.8521	18.398	18.6521	18.6891	17.358	2	1	18.2821	0.597512	0.0326828	Q9H9A5	CNOT10	238	CCR4-NOT transcription complex subunit 10 [OS=Homo sapiens]
20.8848	20.9722	20.771	20.9642	19.3276	21.1552	7	2	20.6792	0.673961	0.0325913	P29965	CD40LG	239	CD40 ligand [OS=Homo sapiens]
18.8021	19.7322	19.4037	19.8872	18.5892	18.4014	1	1	19.136	0.623142	0.0325639	Q7Z7B0	FILIP1	240	Filamin-A-interacting protein 1 [OS=Homo sapiens]
20.6263	20.637	20.7281	19.9977	21.6502	19.7247	6	12	20.5607	0.669459	0.0325602	Q9HCM2	PLXNA4	241	Plexin-A4 [OS=Homo sapiens]
21.1145	20.028	21.4198	20.0151	21.3305	21.4148	8	6	20.8871	0.679561	0.032535	Q5VY43	PEAR1	242	Platelet endothelial aggregation receptor 1 [OS=Homo sapiens]
21.8395	21.1633	21.6961	21.1606	21.9965	20.1074	23	4	21.3272	0.691237	0.032411	Q9Y3B3	TMED7	243	Transmembrane emp24 domain-containing protein 7 [OS=Homo sapiens]
21.1399	20.2258	21.1537	19.484	19.9624	20.3237	23	4	20.3816	0.660307	0.0323972	P51571	SSR4	244	translocon-associated protein subunit delta [OS=Homo sapiens]
18.0797	18.6597	18.5185	18.6152	18.2692	17.0913	5	1	18.2056	0.588782	0.0323407	Q9BY32	ITPA	245	Inosine triphosphate pyrophosphatase [OS=Homo sapiens]
19.3984	19.1606	19.4586	19.5523	19.3196	20.8975	16	4	19.6312	0.634394	0.0323157	Q9H8W4	PLEKHF2	246	Pleckstrin homology domain-containing family F member 2 [OS=Homo sapiens]
21.6526	19.7172	20.41	20.1386	20.7768	20.3376	8	4	20.5055	0.66073	0.0322221	O95831	AIFM1	247	Isoform 3 of Apoptosis-inducing factor 1, mitochondrial [OS=Homo sapiens]
20.3476	20.264	20.2649	18.8857	20.4052	19.3433	28	5	19.9184	0.641555	0.0322091	P37235	HPCAL1	248	Hippocalcin-like protein 1 [OS=Homo sapiens]
22.7863	24.4136	23.1134	24.4719	23.1957	22.9317	23	6	23.4854	0.7553	0.0321604	Q15382	RHEB	249	GTP-binding protein rheb [OS=Homo sapiens]
20.033	18.9688	20.1271	19.9526	20.142	18.7622	12	10	19.6643	0.625953	0.031832	Q7Z2W4	ZC3HAV1	250	zinc finger CCCH-type antiviral protein 1 [OS=Homo sapiens]
17.4951	18.4078	17.3583	18.27	18.8035	17.7182	4	3	18.0088	0.57104	0.0317089	O94874	UFL1	251	E3 UFM1-protein ligase 1 [OS=Homo sapiens]
16.8366	17.2593	16.9644	17.1401	16.2614	15.9111	13	2	16.7288	0.530054	0.0316851	Q96C01	FAM136A	252	Protein FAM136A [OS=Homo sapiens]
21.6461	22.9846	21.5259	23.1587	22.6786	21.9492	10	6	22.3239	0.706507	0.0316481	O60506	SYNCRIP	253	Heterogeneous nuclear ribonucleoprotein Q [OS=Homo sapiens]
22.3082	22.1708	22.2555	23.5648	21.726	21.5646	15	6	22.265	0.704462	0.0316399	Q9BWD1	ACAT2	254	Acetyl-CoA acetyltransferase, cytosolic [OS=Homo sapiens]
19.0537	17.94	19.3786	19.3826	19.5918	18.7932	13	4	19.0233	0.600973	0.0315914	Q9BS40	LXN	255	Latexin [OS=Homo sapiens]
18.9264	18.5181	17.766	19.3543	19.3174	18.9115	12	2	18.7989	0.591941	0.031488	Q969M7	UBE2F	256	NEDD8-conjugating enzyme UBE2F [OS=Homo sapiens]
22.4554	23.6402	22.7379	23.0797	22.7942	21.5023	26	4	22.7016	0.711722	0.0313511	P61626	LYZ	257	lysozyme c [OS=Homo sapiens]
24.7843	23.8387	23.1428	23.0334	24.4987	23.2532	34	9	23.7585	0.743866	0.0313095	Q9Y696	CLIC4	258	Chloride intracellular channel protein 4 [OS=Homo sapiens]
18.6461	18.5701	18.8698	18.5565	19.0226	17.3865	8	2	18.5086	0.579428	0.0313059	Q2TAA2	IAH1	259	Isoamyl acetate-hydrolyzing esterase 1 homolog [OS=Homo sapiens]
22.0759	22.2664	20.9858	22.3971	22.5515	21.0784	11	7	21.8925	0.685141	0.0312956	Q9NRL3	STRN4	260	Striatin-4 [OS=Homo sapiens]
25.3546	24.0783	24.2802	24.0652	23.1114	24.7659	22	5	24.2759	0.754099	0.0310637	Q16762	TST	261	thiosulfate sulfurtransferase [OS=Homo sapiens]
27.0484	28.4786	27.4971	26.9927	26.8805	28.9085	35	4	27.6343	0.857721	0.0310383	P68032	ACTC1	262	Actin, alpha cardiac muscle 1 [OS=Homo sapiens]
23.8525	25.4998	23.6973	23.6242	23.6659	23.6174	28	10	23.9929	0.7432	0.0309759	Q14344	GNA13	263	Guanine nucleotide-binding protein subunit alpha-13 [OS=Homo sapiens]
19.7352	19.2177	19.4404	20.5805	18.7976	19.8074	26	2	19.5965	0.606302	0.0309394	P60468	SEC61B	264	protein transport protein Sec61 subunit beta [OS=Homo sapiens]
22.0458	23.4797	22.1315	23.4485	23.5081	22.4716	10	6	22.8475	0.706245	0.0309112	Q8NBF2	NHLRC2	265	NHL repeat-containing protein 2 [OS=Homo sapiens]
19.8688	20.4195	20.2715	19.6384	18.7645	19.3772	10	3	19.7233	0.608714	0.0308627	P80217	IFI35	266	interferon-induced 35 kDa protein [OS=Homo sapiens]
19.9409	20.076	20.0864	18.5028	19.928	19.6744	26	2	19.7014	0.605735	0.0307457	Q86YW5	TREML1	267	Isoform 2 of Trem-like transcript 1 protein [OS=Homo sapiens]
22.2531	20.7737	21.328	21.7591	21.7676	22.6712	3	1	21.7588	0.668271	0.0307127	Q9BXA7	TSSK1B	268	Testis-specific serine/threonine-protein kinase 1 [OS=Homo sapiens]
19.1714	19.4481	18.7507	19.1503	17.8082	18.8165	2	1	18.8575	0.573978	0.0304376	P49757	NUMB	269	Protein numb homolog [OS=Homo sapiens]
20.0167	20.1044	21.4665	20.7055	20.3854	19.7213	17	3	20.4	0.620648	0.0304239	P01127	PDGFB	270	Platelet-derived growth factor subunit B [OS=Homo sapiens]
19.6123	20.0879	21.0796	20.811	19.8362	19.7137	32	3	20.1901	0.612106	0.0303171	P56385	ATP5ME	271	ATP synthase subunit e, mitochondrial [OS=Homo sapiens]
20.3902	22.2396	22.0333	21.7068	21.8166	21.4777	8	10	21.6107	0.653151	0.0302235	O14980	XPO1	272	Exportin-1 [OS=Homo sapiens]
19.7016	18.4664	19.3425	18.5826	19.8017	19.5841	13	5	19.2465	0.581035	0.0301892	P55010	EIF5	273	Eukaryotic translation initiation factor 5 [OS=Homo sapiens]
20.8641	22.3788	20.8822	20.542	21.21	21.2741	15	2	21.1919	0.639012	0.0301536	O15212	PFDN6	274	Prefoldin subunit 6 [OS=Homo sapiens]
19.8165	20.7983	20.0994	21.22	21.0945	19.9367	7	4	20.4942	0.617365	0.0301238	Q5H9R7	PPP6R3	275	Serine/threonine-protein phosphatase 6 regulatory subunit 3 [OS=Homo sapiens]
25.2203	24.6809	24.8789	24.4229	24.9912	26.5662	48	4	25.1268	0.755607	0.0300718	P48668	KRT6C	276	Keratin, type II cytoskeletal 6C [OS=Homo sapiens]
24.5513	22.7545	24.1468	23.2486	24.0698	24.4463	10	6	23.8696	0.713197	0.0298789	Q8IVB4	SLC9A9	277	Sodium/hydrogen exchanger 9 [OS=Homo sapiens]
18.4367	19.8033	18.7995	19.1373	19.6043	19.8271	24	1	19.268	0.572669	0.0297212	P56134	ATP5MF	278	Isoform 3 of ATP synthase subunit f, mitochondrial [OS=Homo sapiens]
20.9465	21.2752	20.957	21.2618	21.1542	19.6408	6	2	20.8726	0.620126	0.0297101	Q9BSK0	MARVELD1	279	MARVEL domain-containing protein 1 [OS=Homo sapiens]
22.1784	21.6063	21.927	21.8105	23.4372	22.4866	9	5	22.241	0.660603	0.029702	Q9Y6W5	WASF2	280	Wiskott-Aldrich syndrome protein family member 2 [OS=Homo sapiens]
18.7423	17.3795	18.7751	17.8649	18.097	18.4014	11	3	18.21	0.540529	0.029683	O14828	SCAMP3	281	Secretory carrier-associated membrane protein 3 [OS=Homo sapiens]
17.3131	18.1508	17.8998	17.7184	17.6479	16.6657	3	1	17.5659	0.521135	0.0296674	Q9H0U6	MRPL18	282	39S ribosomal protein L18, mitochondrial [OS=Homo sapiens]
21.9859	23.7323	23.6835	23.7307	23.5034	23.6956	24	8	23.3886	0.692394	0.0296039	P09104	ENO2	283	Gamma-enolase [OS=Homo sapiens]
19.5929	20.2604	21.2202	19.7241	20.1054	20.6003	8	4	20.2505	0.59889	0.029574	P08185	SERPINA6	284	corticosteroid-binding globulin [OS=Homo sapiens]
21.105	20.1661	20.7324	19.8189	19.4648	20.3702	6	4	20.2762	0.597233	0.0294548	O15327	INPP4B	285	Type II inositol 3,4-bisphosphate 4-phosphatase [OS=Homo sapiens]
23.8998	23.3697	23.2503	23.8064	25.126	23.3845	23	13	23.8061	0.696852	0.029272	P13797	PLS3	286	Plastin-3 [OS=Homo sapiens]
20.2548	19.8487	19.0697	19.516	20.1329	18.8379	20	3	19.61	0.57326	0.029233	Q9UHV9	PFDN2	287	Prefoldin subunit 2 [OS=Homo sapiens]
21.6408	21.7382	22.626	22.4615	22.2542	20.9131	15	3	21.939	0.636557	0.0290149	O15551	CLDN3	288	Claudin-3 [OS=Homo sapiens]
20.8248	21.2135	20.5681	21.1829	22.1647	20.5029	10	4	21.0762	0.610763	0.0289788	P25685	DNAJB1	289	dnaJ homolog subfamily B member 1 [OS=Homo sapiens]
17.1351	17.6872	17.4487	16.6679	17.1165	16.3451	12	2	17.0667	0.493522	0.0289172	Q16774	GUK1	290	guanylate kinase [OS=Homo sapiens]
20.7918	20.3119	21.1691	21.0214	19.5452	20.5862	4	6	20.5709	0.588057	0.0285868	O15439	ABCC4	291	multidrug resistance-associated protein 4 [OS=Homo sapiens]
20.6033	19.6961	20.1347	19.5361	19.1517	20.4769	29	6	19.9331	0.567442	0.0284673	Q9Y3A3	MOB4	292	Isoform 3 of MOB-like protein phocein [OS=Homo sapiens]
21.8979	20.7224	21.9584	20.6062	21.0121	21.6872	7	8	21.314	0.606213	0.028442	Q7Z460	CLASP1	293	Isoform 2 of CLIP-associating protein 1 [OS=Homo sapiens]
22.587	21.5701	21.9178	22.0661	20.9755	22.5941	9	7	21.9518	0.621125	0.028295	Q08554	DSC1	294	Desmocollin-1 [OS=Homo sapiens]
20.1834	21.3182	21.2828	21.4718	21.3426	20.2425	6	6	20.9735	0.592904	0.0282691	O14617	AP3D1	295	Isoform 4 of AP-3 complex subunit delta-1 [OS=Homo sapiens]
19.717	19.5811	19.3909	19.4162	19.358	18.2123	1	1	19.2792	0.540103	0.0280147	Q68DL7	C18orf63	296	Uncharacterized protein C18orf63 [OS=Homo sapiens]
19.5428	20.0435	18.921	20.2951	20.4325	19.7532	6	5	19.8313	0.554891	0.0279805	Q86VS8	HOOK3	297	Protein Hook homolog 3 [OS=Homo sapiens]
19.4182	20.4121	19.6401	20.9155	20.4331	20.4191	8	15	20.2063	0.562791	0.0278522	Q96BY6	DOCK10	298	Isoform 3 of Dedicator of cytokinesis protein 10 [OS=Homo sapiens]
19.1539	19.5047	19.5295	18.248	19.6713	19.5855	3	1	19.2821	0.536683	0.0278332	Q15005	SPCS2	299	Signal peptidase complex subunit 2 [OS=Homo sapiens]
18.3089	18.5727	18.2303	17.744	18.0427	17.161	2	1	18.0099	0.499444	0.0277316	Q9NZ09	UBAP1	300	Ubiquitin-associated protein 1 [OS=Homo sapiens]
19.4579	20.6679	20.8885	20.7522	20.5926	19.9103	10	3	20.3783	0.564989	0.0277251	P54619	PRKAG1	301	5'-AMP-activated protein kinase subunit gamma-1 [OS=Homo sapiens]
21.0901	22.6654	22.675	22.3486	22.025	22.607	15	6	22.2352	0.613993	0.0276136	Q14012	CAMK1	302	calcium/calmodulin-dependent protein kinase type 1 [OS=Homo sapiens]
22.5296	21.6535	21.8004	20.7486	21.2239	21.6717	43	2	21.6046	0.596395	0.027605	Q96IX5	ATP5MK	303	Up-regulated during skeletal muscle growth protein 5 [OS=Homo sapiens]
20.6947	22.1515	20.8463	21.8999	21.6985	21.7376	15	4	21.5047	0.592582	0.0275559	Q7L5N1	COPS6	304	COP9 signalosome complex subunit 6 [OS=Homo sapiens]
22.1595	23.5492	22.9495	23.0246	22.3742	21.8996	30	7	22.6594	0.619327	0.027332	Q9BWM7	SFXN3	305	Sideroflexin-3 [OS=Homo sapiens]
22.2291	23.0276	21.4148	22.2044	22.622	23.0261	15	3	22.4207	0.61167	0.0272815	P00403	MT-CO2	306	Cytochrome c oxidase subunit 2 [OS=Homo sapiens]
20.0548	19.753	20.2086	19.9856	21.2536	19.8387	10	3	20.1824	0.548775	0.0271908	Q9H0W9	C11orf54	307	Ester hydrolase C11orf54 [OS=Homo sapiens]
21.3448	22.5128	21.6699	22.7768	21.9926	21.3763	26	6	21.9455	0.595962	0.0271564	Q04760	GLO1	308	lactoylglutathione lyase [OS=Homo sapiens]
21.7941	22.4477	22.0131	20.6759	21.5813	21.8142	19	6	21.7211	0.589779	0.0271524	Q96CN7	ISOC1	309	Isochorismatase domain-containing protein 1 [OS=Homo sapiens]
18.018	19.2651	19.3073	19.4375	19.0971	19.0856	3	1	19.0351	0.515717	0.027093	Q9Y619	SLC25A15	310	mitochondrial ornithine transporter 1 [OS=Homo sapiens]
17.1672	17.5814	17.5504	17.0903	17.0908	16.2988	1	1	17.1298	0.46387	0.0270796	Q5VYS8	TUT7	311	terminal uridylyltransferase 7 [OS=Homo sapiens]
18.6856	19.8076	18.823	18.8876	19.8266	18.8987	7	3	19.1548	0.5186	0.0270741	Q9NS86	LANCL2	312	lanC-like protein 2 [OS=Homo sapiens]
29.3128	28.2086	28.1937	27.5798	27.1957	27.5241	40	9	28.0024	0.755567	0.0269822	P05090	APOD	313	apolipoprotein D [OS=Homo sapiens]
22.1817	20.9146	21.9551	20.9162	21.982	22.0193	12	5	21.6615	0.583271	0.0269266	O75190	DNAJB6	314	DnaJ homolog subfamily B member 6 [OS=Homo sapiens]
21.1225	21.5635	21.3921	21.1691	21.1202	19.9576	8	3	21.0542	0.565397	0.0268544	P08574	CYC1	315	Cytochrome c1, heme protein, mitochondrial [OS=Homo sapiens]
26.3239	25.075	25.4453	24.6961	25.6382	26.4489	14	20	25.6046	0.687403	0.0268469	Q04637	EIF4G1	316	Isoform D of Eukaryotic translation initiation factor 4 gamma 1 [OS=Homo sapiens]
21.0631	20.1393	20.6111	20.7408	21.3116	21.7382	8	6	20.934	0.561977	0.0268452	P22059	OSBP	317	Oxysterol-binding protein 1 [OS=Homo sapiens]
20.2196	19.0422	20.2422	19.9313	20.6261	20.1572	5	2	20.0364	0.536221	0.0267623	O15269	SPTLC1	318	serine palmitoyltransferase 1 [OS=Homo sapiens]
28.9752	27.5039	28.5897	27.0051	28.0269	28.6003	8	5	28.1168	0.750185	0.026681	Q9NZQ3	NCKIPSD	319	NCK-interacting protein with SH3 domain [OS=Homo sapiens]
18.8627	18.9246	18.8078	19.75	19.8777	19.7678	5	2	19.3318	0.51449	0.0266137	P12268	IMPDH2	320	inosine-5'-monophosphate dehydrogenase 2 [OS=Homo sapiens]
19.2792	18.0959	19.3332	19.3915	19.2778	19.3968	9	2	19.1291	0.50878	0.0265972	Q9NRW3	APOBEC3C	321	DNA dC->dU-editing enzyme APOBEC-3C [OS=Homo sapiens]
26.4068	28.086	26.4779	27.7791	26.9582	26.575	32	16	27.0472	0.718322	0.0265581	P02774	GC	322	vitamin D-binding protein [OS=Homo sapiens]
20.518	20.6508	21.3296	20.2344	20.2116	19.7092	8	3	20.4423	0.542294	0.0265281	Q13347	EIF3I	323	Eukaryotic translation initiation factor 3 subunit I [OS=Homo sapiens]
19.2216	20.2014	19.9001	19.3402	19.401	18.7486	10	1	19.4688	0.514512	0.0264275	P24311	COX7B	324	Cytochrome c oxidase subunit 7B, mitochondrial [OS=Homo sapiens]
20.1181	21.708	21.5473	21.186	21.2565	21.3109	7	4	21.1878	0.559286	0.0263966	P11166	SLC2A1	325	Solute carrier family 2, facilitated glucose transporter member 1 [OS=Homo sapiens]
24.1751	23.8268	23.7044	23.8464	24.0768	25.422	6	6	24.1752	0.634876	0.0262614	Q9Y4W6	AFG3L2	326	AFG3-like protein 2 [OS=Homo sapiens]
20.9127	21.2822	20.7148	22.0577	21.8784	20.9225	14	4	21.2947	0.555619	0.0260919	Q8IZD0	SAMD14	327	Sterile alpha motif domain-containing protein 14 [OS=Homo sapiens]
18.6604	18.6311	17.6546	19.0142	18.4482	18.8857	3	1	18.5491	0.481457	0.0259559	P19784	CSNK2A2	328	casein kinase II subunit alpha' [OS=Homo sapiens]
18.921	19.8983	19.4166	18.6989	18.6618	19.4797	19	1	19.1794	0.495752	0.0258482	Q8TAD7	OCC1	329	Overexpressed in colon carcinoma 1 protein [OS=Homo sapiens]
17.6812	18.4755	17.3305	17.7596	17.9616	17.2059	2	1	17.7357	0.457545	0.025798	P55285	CDH6	330	Cadherin-6 [OS=Homo sapiens]
20.7711	21.1986	20.6355	20.3933	19.663	20.1741	19	7	20.4726	0.527909	0.0257861	O75351	VPS4B	331	Vacuolar protein sorting-associated protein 4B [OS=Homo sapiens]
19.2068	17.916	19.0937	19.1796	18.9629	18.9351	5	1	18.8823	0.486093	0.0257433	P53680	AP2S1	332	AP-2 complex subunit sigma [OS=Homo sapiens]
22.7821	24.1036	23.07	23.0361	23.9707	22.7584	40	9	23.2868	0.596435	0.0256125	P16152	CBR1	333	Carbonyl reductase [NADPH] 1 [OS=Homo sapiens]
21.991	23.1567	22.4423	23.3702	23.2574	23.431	18	12	22.9414	0.586885	0.0255819	Q9NQW7	XPNPEP1	334	Isoform 3 of Xaa-Pro aminopeptidase 1 [OS=Homo sapiens]
22.3146	21.3855	21.1824	22.5151	22.3499	22.2071	18	7	21.9924	0.561308	0.0255228	P53990	IST1	335	Isoform 5 of IST1 homolog [OS=Homo sapiens]
21.7128	22.9384	22.8176	23.2269	22.1239	22.8991	13	4	22.6198	0.575476	0.0254413	P98172	EFNB1	336	ephrin-B1 [OS=Homo sapiens]
21.2539	20.4254	20.0888	21.2034	21.2613	21.3361	4	3	20.9282	0.532274	0.0254334	Q5TCZ1	SH3PXD2A	337	Isoform 2 of SH3 and PX domain-containing protein 2A [OS=Homo sapiens]
17.2518	18.1476	17.5612	17.7781	17.9175	16.9322	3	1	17.598	0.447462	0.0254268	Q92604	LPGAT1	338	Acyl-CoA:lysophosphatidylglycerol acyltransferase 1 [OS=Homo sapiens]
23.207	21.6875	22.1238	22.692	22.9476	22.8971	3	14	22.5925	0.573598	0.0253889	O75592	MYCBP2	339	E3 ubiquitin-protein ligase MYCBP2 [OS=Homo sapiens]
18.0807	16.9581	17.6837	17.3582	17.03	17.7838	1	1	17.4824	0.443689	0.0253792	Q3LXA3	TKFC	340	Triokinase/FMN cyclase [OS=Homo sapiens]
19.193	19.2481	19.0881	18.9373	19.1544	17.9823	7	5	18.9339	0.47827	0.02526	Q8TD16	BICD2	341	Protein bicaudal D homolog 2 [OS=Homo sapiens]
18.3298	19.6733	19.198	19.557	19.0012	18.9742	14	8	19.1222	0.482278	0.0252208	P05160	F13B	342	Coagulation factor XIII B chain [OS=Homo sapiens]
21.3104	21.6525	21.9192	21.1883	21.4986	20.3729	22	9	21.3237	0.532158	0.0249562	P35998	PSMC2	343	26S proteasome regulatory subunit 7 [OS=Homo sapiens]
19.5629	19.6621	18.5108	19.918	19.5352	19.5553	17	3	19.4574	0.485145	0.0249337	P15374	UCHL3	344	Ubiquitin carboxyl-terminal hydrolase isozyme L3 [OS=Homo sapiens]
20.9681	22.3413	21.2163	21.133	20.9071	21.171	7	2	21.2895	0.529094	0.0248524	P08571	CD14	345	Monocyte differentiation antigen CD14 [OS=Homo sapiens]
20.4391	21.0242	20.1685	20.5379	21.5561	20.3754	26	5	20.6835	0.513513	0.0248272	O00154	ACOT7	346	Isoform 2 of Cytosolic acyl coenzyme A thioester hydrolase [OS=Homo sapiens]
21.9813	21.8369	20.6748	21.916	21.5776	21.0442	18	8	21.5051	0.53157	0.0247183	P49257	LMAN1	347	Protein ERGIC-53 [OS=Homo sapiens]
20.4305	21.096	21.4869	21.7374	21.779	20.9266	8	5	21.2427	0.524041	0.0246692	Q14258	TRIM25	348	E3 ubiquitin/ISG15 ligase TRIM25 [OS=Homo sapiens]
21.0729	20.9752	21.2514	22.3582	21.0252	21.1395	18	8	21.3037	0.525456	0.024665	P06132	UROD	349	Uroporphyrinogen decarboxylase [OS=Homo sapiens]
19.4399	19.1746	18.8014	19.009	18.2221	19.4759	2	2	19.0205	0.467464	0.0245769	Q9Y2H0	DLGAP4	350	Isoform 2 of Disks large-associated protein 4 [OS=Homo sapiens]
17.2026	18.2738	17.4198	17.3504	17.2115	17.1231	1	1	17.4302	0.427089	0.0245028	Q07889	SOS1	351	Son of sevenless homolog 1 [OS=Homo sapiens]
21.7826	20.9473	21.3085	20.4235	20.4755	20.9236	24	6	20.9768	0.513897	0.0244983	Q9UJZ1	STOML2	352	Stomatin-like protein 2, mitochondrial [OS=Homo sapiens]
18.0594	17.696	17.7081	18.2389	18.7507	18.6148	1	1	18.178	0.44488	0.0244736	Q9P0K7	RAI14	353	Ankycorbin [OS=Homo sapiens]
21.2807	22.1501	21.6451	22.364	22.6531	21.517	12	5	21.935	0.53534	0.0244058	Q9Y5P6	GMPPB	354	Mannose-1-phosphate guanyltransferase beta [OS=Homo sapiens]
21.8393	21.2335	20.3644	21.1331	21.4604	21.6534	12	8	21.2807	0.519013	0.0243889	Q8IZ83	ALDH16A1	355	Aldehyde dehydrogenase family 16 member A1 [OS=Homo sapiens]
20.8698	21.0886	20.1639	20.3945	20.9982	21.5779	16	3	20.8488	0.507412	0.0243377	Q9GZP4	PITHD1	356	PITH domain-containing protein 1 [OS=Homo sapiens]
23.1385	22.287	21.9361	22.6045	23.3053	23.1662	2	9	22.7396	0.553122	0.0243242	Q8N3K9	CMYA5	357	Cardiomyopathy-associated protein 5 [OS=Homo sapiens]
21.1426	22.1266	21.8768	22.3987	22.1324	21.176	31	4	21.8089	0.529667	0.0242868	P61019	RAB2A	358	Ras-related protein Rab-2A [OS=Homo sapiens]
17.6702	18.1738	17.7848	18.4008	18.8892	18.0997	8	2	18.1698	0.441285	0.0242868	Q96C19	EFHD2	359	EF-hand domain-containing protein D2 [OS=Homo sapiens]
22.3212	22.4628	21.7611	21.8899	23.2823	22.5329	7	13	22.375	0.542396	0.0242411	Q08378	GOLGA3	360	Golgin subfamily A member 3 [OS=Homo sapiens]
18.011	18.6044	18.3083	18.2324	18.1741	17.3052	1	1	18.1059	0.438224	0.0242034	Q8NEN9	PDZD8	361	PDZ domain-containing protein 8 [OS=Homo sapiens]
18.0714	17.3263	17.8037	17.7172	17.8632	18.6292	3	1	17.9018	0.432282	0.0241474	Q9UBX7	KLK11	362	Isoform 1 of Kallikrein-11 [OS=Homo sapiens]
19.2582	18.3868	19.1711	18.6968	19.4748	19.5688	1	1	19.0927	0.460688	0.024129	Q8IY17	PNPLA6	363	Neuropathy target esterase [OS=Homo sapiens]
20.5773	19.8683	20.4045	20.0716	20.0063	21.1997	1	1	20.3546	0.490733	0.0241092	Q96M91	CFAP53	364	cilia- and flagella-associated protein 53 [OS=Homo sapiens]
20.9025	21.821	21.1417	21.868	22.087	22.1772	6	5	21.6662	0.521772	0.0240823	P46977	STT3A	365	Dolichyl-diphosphooligosaccharide--protein glycosyltransferase subunit STT3A [OS=Homo sapiens]
20.6223	19.5857	20.9978	20.8184	20.6431	20.6418	20	8	20.5515	0.49492	0.0240819	P23526	AHCY	366	Adenosylhomocysteinase [OS=Homo sapiens]
20.6139	21.3585	19.9364	21.1281	20.837	20.5346	14	5	20.7347	0.499241	0.0240775	Q05193	DNM1	367	Dynamin-1 [OS=Homo sapiens]
20.2807	19.4924	19.7779	19.5111	20.0419	20.726	1	1	19.9717	0.47933	0.0240005	O15259	NPHP1	368	Nephrocystin-1 [OS=Homo sapiens]
18.727	18.7941	18.2153	19.1244	19.4053	19.3752	4	1	18.9402	0.454258	0.0239838	O43402	EMC8	369	ER membrane protein complex subunit 8 [OS=Homo sapiens]
27.8889	26.2781	27.3883	26.5789	27.123	27.7914	32	10	27.1748	0.647699	0.0238346	Q99623	PHB2	370	Prohibitin-2 [OS=Homo sapiens]
19.8904	20.7977	21.3046	20.5746	20.1993	20.6467	16	2	20.5689	0.489204	0.0237837	P50225	SULT1A1	371	Sulfotransferase 1A1 [OS=Homo sapiens]
22.1707	21.102	21.7365	20.9513	21.8209	22.1173	19	3	21.6498	0.512773	0.0236849	O75832	PSMD10	372	26S proteasome non-ATPase regulatory subunit 10 [OS=Homo sapiens]
21.47	22.2761	21.0736	21.5887	21.4863	22.3979	7	2	21.7154	0.513961	0.023668	Q53GL0	PLEKHO1	373	pleckstrin homology domain-containing family O member 1 [OS=Homo sapiens]
20.3093	21.4567	21.0449	21.7115	21.1894	20.7731	16	5	21.0808	0.49841	0.0236428	O76003	GLRX3	374	glutaredoxin-3 [OS=Homo sapiens]
24.3203	23.7728	22.9563	23.0897	22.9879	23.1235	4	6	23.3751	0.551637	0.0235994	Q8N2N9	ANKRD36B	375	Isoform 2 of Ankyrin repeat domain-containing protein 36B [OS=Homo sapiens]
21.2616	19.9586	20.9623	21.1589	21.1319	21.1796	5	3	20.9421	0.491782	0.0234829	P32189	GK	376	glycerol kinase [OS=Homo sapiens]
20.9049	20.9104	21.1629	21.2079	20.9402	22.2003	10	2	21.2211	0.497561	0.0234465	O43674	NDUFB5	377	NADH dehydrogenase [ubiquinone] 1 beta subcomplex subunit 5, mitochondrial [OS=Homo sapiens]
20.5441	20.4808	20.8477	20.2472	19.4916	20.009	22	6	20.2701	0.474929	0.0234301	Q12846	STX4	378	Syntaxin-4 [OS=Homo sapiens]
20.0061	20.1632	19.9265	20.104	19.2701	19.0815	6	6	19.7586	0.462488	0.023407	Q86UT6	NLRX1	379	NLR family member X1 [OS=Homo sapiens]
18.7507	19.7177	19.1644	19.6209	19.5757	18.7103	16	1	19.2566	0.44945	0.0233401	P36980	CFHR2	380	Complement factor H-related protein 2 [OS=Homo sapiens]
18.852	18.7848	18.4545	18.0871	18.1875	17.746	6	3	18.352	0.427168	0.0232764	P08195	SLC3A2	381	4F2 cell-surface antigen heavy chain [OS=Homo sapiens]
19.8303	19.5271	19.6426	19.1289	19.6659	18.6183	4	1	19.4022	0.45061	0.0232247	Q9NVV5	AIG1	382	Androgen-induced gene 1 protein [OS=Homo sapiens]
22.0047	21.6602	21.1724	21.0994	21.5029	20.5873	17	9	21.3378	0.49467	0.0231828	Q9UNF1	MAGED2	383	Melanoma-associated antigen D2 [OS=Homo sapiens]
17.8814	17.7628	17.6006	16.9006	18.0531	17.4232	2	1	17.6036	0.407759	0.0231634	Q96Q11	TRNT1	384	CCA tRNA nucleotidyltransferase 1, mitochondrial [OS=Homo sapiens]
23.3585	24.6179	23.2549	24.0108	24.2346	23.4428	26	6	23.8199	0.551305	0.0231447	O14818	PSMA7	385	Proteasome subunit alpha type-7 [OS=Homo sapiens]
21.8564	20.9488	22.2113	21.1929	21.0642	21.6189	15	12	21.4821	0.496642	0.0231189	P42566	EPS15	386	epidermal growth factor receptor substrate 15 [OS=Homo sapiens]
18.0244	18.3056	17.3193	17.2789	17.7047	17.9256	2	1	17.7597	0.405912	0.0228557	Q93099	HGD	387	Homogentisate 1,2-dioxygenase [OS=Homo sapiens]
23.4992	23.4588	23.4165	23.5701	23.5076	24.8108	18	16	23.7105	0.541448	0.0228358	Q9UDT6	CLIP2	388	Isoform 2 of CAP-Gly domain-containing linker protein 2 [OS=Homo sapiens]
21.1703	21.7199	20.8726	21.8314	21.4556	20.5921	6	2	21.2736	0.485665	0.0228294	O15427	SLC16A3	389	Monocarboxylate transporter 4 [OS=Homo sapiens]
21.2641	20.9165	21.5228	20.8296	20.334	21.6106	6	6	21.0796	0.481137	0.0228248	Q9Y3P9	RABGAP1	390	Rab GTPase-activating protein 1 [OS=Homo sapiens]
18.9955	18.9859	19.1703	19.7114	19.9373	19.8696	2	1	19.445	0.44316	0.0227904	Q7Z7B1	PIGW	391	Phosphatidylinositol-glycan biosynthesis class W protein [OS=Homo sapiens]
17.8961	18.6813	18.3437	18.3237	18.2344	17.4903	3	1	18.1616	0.413761	0.0227822	Q15233	NONO	392	Non-POU domain-containing octamer-binding protein [OS=Homo sapiens]
18.7786	19.4586	18.911	19.6295	19.68	19.864	3	1	19.3869	0.441357	0.0227657	Q8NFQ8	TOR1AIP2	393	Torsin-1A-interacting protein 2 [OS=Homo sapiens]
21.7996	20.2904	21.0734	21.121	21.1233	21.1489	20	7	21.0928	0.479283	0.0227226	P29508	SERPINB3	394	Serpin B3 [OS=Homo sapiens]
20.4871	21.5107	21.5936	21.6346	21.8279	21.1493	21	11	21.3672	0.485312	0.022713	O00186	STXBP3	395	syntaxin-binding protein 3 [OS=Homo sapiens]
18.0224	18.1509	18.26	17.229	18.2886	18.2804	12	3	18.0386	0.409476	0.0227	P28289	TMOD1	396	Tropomodulin-1 [OS=Homo sapiens]
21.2986	21.4189	21.2962	22.2786	22.2497	21.2645	17	8	21.6344	0.490725	0.0226826	P55809	OXCT1	397	Succinyl-CoA:3-ketoacid coenzyme A transferase 1, mitochondrial [OS=Homo sapiens]
19.8393	19.1823	18.9676	19.6612	18.7179	18.9856	6	2	19.2257	0.435938	0.0226748	P23258	TUBG1	398	tubulin gamma-1 chain [OS=Homo sapiens]
20.5232	20.8793	21.6477	20.6262	21.5521	20.8335	5	5	21.0103	0.476056	0.0226582	Q92973	TNPO1	399	transportin-1 [OS=Homo sapiens]
21.2536	20.4527	19.8476	20.7151	20.7771	20.8005	15	5	20.6411	0.466834	0.0226167	Q9H2M3	BHMT2	400	S-methylmethionine--homocysteine S-methyltransferase BHMT2 [OS=Homo sapiens]
26.0573	24.8298	26.0911	25.0222	26.0986	25.8831	27	24	25.6637	0.579966	0.0225987	Q8WUM4	PDCD6IP	401	Programmed cell death 6-interacting protein [OS=Homo sapiens]
19.0143	19.7878	19.5473	19.385	19.5138	18.581	4	2	19.3049	0.436002	0.0225851	Q53H12	AGK	402	Acylglycerol kinase, mitochondrial [OS=Homo sapiens]
19.6083	19.8308	20.1214	19.4825	19.0324	19.0059	8	3	19.5136	0.440274	0.0225625	Q9UPY6	WASF3	403	Wiskott-Aldrich syndrome protein family member 3 [OS=Homo sapiens]
19.425	19.0579	19.4033	18.2723	18.8097	19.0621	8	3	19.0051	0.428043	0.0225226	Q08752	PPID	404	peptidyl-prolyl cis-trans isomerase D [OS=Homo sapiens]
22.6066	22.8625	22.4039	22.6003	22.3878	23.749	15	10	22.7683	0.510401	0.0224171	P26639	TARS1	405	Isoform 2 of Threonine--tRNA ligase, cytoplasmic [OS=Homo sapiens]
23.9731	24.2563	24.0839	24.1933	25.4098	24.0053	12	18	24.3203	0.544574	0.0223918	Q96P48	ARAP1	406	Arf-GAP with Rho-GAP domain, ANK repeat and PH domain-containing protein 1 [OS=Homo sapiens]
21.4208	22.0448	20.8541	22.0091	21.4498	21.0903	12	6	21.4782	0.478943	0.0222991	Q13177	PAK2	407	Serine/threonine-protein kinase PAK 2 [OS=Homo sapiens]
24.6943	26.1768	26.0189	25.9147	26.2713	25.7762	20	20	25.8087	0.57409	0.0222441	P53396	ACLY	408	ATP-citrate synthase [OS=Homo sapiens]
21.5813	20.9106	20.2359	21.2261	20.7594	21.2188	2	5	20.9887	0.466025	0.0222036	Q5THR3	EFCAB6	409	EF-hand calcium-binding domain-containing protein 6 [OS=Homo sapiens]
20.9066	21.725	20.8734	21.5926	21.375	22.0839	5	5	21.4261	0.474918	0.0221654	Q6WCQ1	MPRIP	410	Myosin phosphatase Rho-interacting protein [OS=Homo sapiens]
20.8701	20.2306	20.9336	20.0937	19.9959	20.952	12	4	20.5127	0.451681	0.0220196	P50213	IDH3A	411	Isocitrate dehydrogenase [NAD] subunit alpha, mitochondrial [OS=Homo sapiens]
18.2091	18.0908	17.5041	17.9804	18.2945	17.329	2	1	17.9013	0.394147	0.0220177	P48163	ME1	412	NADP-dependent malic enzyme [OS=Homo sapiens]
21.3329	21.1878	20.2674	21.2543	21.3791	20.5989	10	6	21.0034	0.458679	0.0218383	P33151	CDH5	413	Cadherin-5 [OS=Homo sapiens]
20.6113	21.3076	20.9945	21.455	21.6729	20.5445	16	5	21.0976	0.459527	0.021781	Q9HAB8	PPCS	414	phosphopantothenate--cysteine ligase [OS=Homo sapiens]
22.3665	21.4641	22.5194	21.4706	22.2576	22.3933	6	4	22.0786	0.480726	0.0217734	Q3YEC7	RABL6	415	Isoform 2 of Rab-like protein 6 [OS=Homo sapiens]
19.1223	19.2245	18.4175	19.2046	18.8278	19.6445	4	1	19.0735	0.414524	0.021733	A6NFX1	MFSD2B	416	Major facilitator superfamily domain-containing protein 2B [OS=Homo sapiens]
18.1964	19.2416	18.7179	19.0938	18.8651	18.3677	3	1	18.7471	0.406636	0.0216906	Q9H813	PACC1	417	Transmembrane protein 206 [OS=Homo sapiens]
22.3326	21.4383	22.8476	22.43	22.6363	22.2713	2	2	22.326	0.483792	0.0216694	P0CW18	PRSS56	418	Serine protease 56 [OS=Homo sapiens]
19.533	19.8151	19.4821	20.3716	19.8452	20.5247	9	1	19.9286	0.430644	0.0216094	Q9Y2Q5	LAMTOR2	419	Ragulator complex protein LAMTOR2 [OS=Homo sapiens]
19.6515	19.0965	19.6587	18.7651	19.4718	19.9027	9	4	19.4244	0.419445	0.0215937	Q15435	PPP1R7	420	Protein phosphatase 1 regulatory subunit 7 [OS=Homo sapiens]
21.0921	20.2265	20.4926	20.3676	19.7825	20.1141	2	5	20.3459	0.439148	0.0215841	P27708	CAD	421	CAD protein [OS=Homo sapiens]
21.512	21.3664	20.3304	21.0458	21.4566	20.8366	19	4	21.0913	0.454307	0.02154	P43487	RANBP1	422	Ran-specific GTPase-activating protein [OS=Homo sapiens]
21.6549	21.1475	21.4258	21.4169	21.4714	20.3766	8	7	21.2489	0.457164	0.0215148	O95834	EML2	423	Isoform 3 of Echinoderm microtubule-associated protein-like 2 [OS=Homo sapiens]
18.0994	17.8419	17.9095	17.6229	18.5197	18.5975	1	1	18.0985	0.388382	0.0214594	Q6PJF5	RHBDF2	424	Inactive rhomboid protein 2 [OS=Homo sapiens]
19.8719	19.2147	20.0819	20.2649	20.4276	19.8605	15	4	19.9536	0.424118	0.0212552	Q8NFV4	ABHD11	425	Protein Abhd11 [OS=Homo sapiens]
22.1641	20.8884	21.5182	20.9909	21.4169	21.4943	7	1	21.4121	0.455029	0.021251	Q53FT3	HIKESHI	426	Protein Hikeshi [OS=Homo sapiens]
26.6232	25.4572	26.5441	25.5438	26.5805	26.5562	28	3	26.2175	0.5567	0.0212339	P26447	S100A4	427	Protein S100-A4 [OS=Homo sapiens]
22.9981	22.1362	22.9588	21.9614	21.9574	22.4472	19	3	22.4099	0.475289	0.0212089	Q15185	PTGES3	428	Prostaglandin E synthase 3 [OS=Homo sapiens]
21.7591	21.7079	21.5709	21.6331	21.4109	22.7067	15	6	21.7981	0.46131	0.0211629	Q6NVY1	HIBCH	429	3-hydroxyisobutyryl-CoA hydrolase, mitochondrial [OS=Homo sapiens]
21.7205	20.6374	21.7148	20.9141	21.5011	21.5201	14	8	21.3347	0.451339	0.0211552	Q06124	PTPN11	430	tyrosine-protein phosphatase non-receptor type 11 [OS=Homo sapiens]
22.9865	23.7338	23.0268	22.8421	22.2244	23.1253	24	18	22.9898	0.485986	0.0211392	Q9UBC2	EPS15L1	431	Epidermal growth factor receptor substrate 15-like 1 [OS=Homo sapiens]
21.2893	22.4364	21.3914	22.258	21.8153	21.6728	19	11	21.8105	0.460073	0.0210941	Q15642	TRIP10	432	Isoform 2 of Cdc42-interacting protein 4 [OS=Homo sapiens]
21.4578	21.6	22.1658	22.4273	21.4202	21.3001	20	8	21.7285	0.457816	0.0210698	P29622	SERPINA4	433	Kallistatin [OS=Homo sapiens]
22.1943	21.4601	21.6853	21.7523	22.7579	21.8603	25	1	21.9517	0.4625	0.021069	P62328	TMSB4X	434	Thymosin beta-4 [OS=Homo sapiens]
21.6109	22.156	21.233	22.5031	21.5254	21.8485	36	6	21.8128	0.459363	0.0210593	P05452	CLEC3B	435	Tetranectin [OS=Homo sapiens]
21.7879	21.0896	21.6853	20.7185	20.8144	21.0701	15	3	21.1943	0.445085	0.0210002	P31944	CASP14	436	Caspase-14 [OS=Homo sapiens]
23.2522	22.4663	22.8831	22.8561	23.2864	23.8796	17	13	23.104	0.484492	0.0209701	Q02413	DSG1	437	Desmoglein-1 [OS=Homo sapiens]
20.0872	19.7553	19.8459	19.234	20.2321	20.4097	7	4	19.9274	0.416666	0.0209092	Q9UGP4	LIMD1	438	LIM domain-containing protein 1 [OS=Homo sapiens]
20.0212	20.3625	20.9645	20.3053	20.9836	20.0662	59	4	20.4505	0.426419	0.0208512	P07108	DBI	439	acyl-CoA-binding protein [OS=Homo sapiens]
21.3564	21.8494	20.7165	21.5178	21.1965	21.9188	47	2	21.4259	0.445293	0.0207829	P62834	RAP1A	440	ras-related protein Rap-1A [OS=Homo sapiens]
22.2468	21.8093	22.1185	21.2722	21.2843	21.2787	25	9	21.6683	0.450207	0.0207772	P62195	PSMC5	441	Isoform 2 of 26S proteasome regulatory subunit 8 [OS=Homo sapiens]
21.5802	21.7424	21.2647	21.6736	21.3496	20.5377	16	5	21.358	0.442381	0.0207126	P55036	PSMD4	442	26S proteasome non-ATPase regulatory subunit 4 [OS=Homo sapiens]
22.4213	22.6062	22.7466	22.2189	22.2492	21.434	17	5	22.2794	0.4614	0.0207097	P14324	FDPS	443	Isoform 2 of Farnesyl pyrophosphate synthase [OS=Homo sapiens]
21.3389	20.8402	20.1798	20.5529	21.1041	21.1548	17	3	20.8618	0.432008	0.0207081	Q7L9L4	MOB1B	444	mob kinase activator 1b [OS=Homo sapiens]
21.6386	22.6289	21.7085	21.7277	21.5988	21.2946	9	4	21.7662	0.45073	0.0207078	Q9UI12	ATP6V1H	445	V-type proton ATPase subunit H [OS=Homo sapiens]
22.4875	23.0744	22.9914	23.1714	23.1762	22.007	15	11	22.818	0.472427	0.0207042	Q96QK1	VPS35	446	Vacuolar protein sorting-associated protein 35 [OS=Homo sapiens]
20.6378	20.5993	20.6682	20.6263	20.699	21.6973	10	6	20.8213	0.43053	0.0206774	P07602	PSAP	447	Prosaposin [OS=Homo sapiens]
19.8452	20.3157	20.2506	20.375	19.3206	20.3095	29	2	20.0694	0.413665	0.0206117	Q9H3K6	BOLA2	448	bola-like protein 2 [OS=Homo sapiens]
25.9051	26.6287	25.9884	26.6037	26.3076	25.1941	6	11	26.1046	0.538016	0.02061	O95425	SVIL	449	Supervillin [OS=Homo sapiens]
23.7727	23.5521	23.6538	24.3904	24.7716	23.6799	25	4	23.9701	0.493355	0.0205821	P0C0L4	C4A	450	Complement C4-A [OS=Homo sapiens]
16.9816	16.5279	17.6228	17.1339	17.0952	17.1486	0	1	17.085	0.351229	0.0205578	Q9Y520	PRRC2C	451	Protein Prrc2c [OS=Homo sapiens]
18.2004	18.0351	17.3848	18.4422	17.9571	17.73	0	1	17.9583	0.368692	0.0205305	Q5TAX3	TUT4	452	Terminal uridylyltransferase 4 [OS=Homo sapiens]
20.5869	21.1245	20.6706	21.0654	21.6253	20.4869	13	2	20.9266	0.42916	0.0205078	O95298	NDUFC2	453	NADH dehydrogenase [ubiquinone] 1 subunit C2 [OS=Homo sapiens]
20.2829	20.0191	20.6434	19.6256	19.5555	20.1632	23	4	20.0483	0.411043	0.0205026	O75223	GGCT	454	gamma-glutamylcyclotransferase [OS=Homo sapiens]
22.8758	23.0246	22.1351	22.8947	22.9089	23.6077	40	10	22.9078	0.469414	0.0204915	Q14696	MESD	455	LRP chaperone MESD [OS=Homo sapiens]
18.6769	18.5694	18.8265	17.7497	18.4017	18.5818	4	1	18.4677	0.378335	0.0204864	Q96K17	BTF3L4	456	transcription factor BTF3 homolog 4 [OS=Homo sapiens]
21.3875	22.0531	21.4732	22.1382	22.2212	21.1852	10	9	21.743	0.445284	0.0204794	Q02218	OGDH	457	2-oxoglutarate dehydrogenase, mitochondrial [OS=Homo sapiens]
21.0412	20.3394	21.0029	20.2021	20.0484	20.3771	38	1	20.5018	0.419376	0.0204555	P10720	PF4V1	458	Platelet factor 4 variant [OS=Homo sapiens]
20.3845	21.1166	20.1046	20.9649	20.7816	20.2	8	3	20.592	0.420611	0.0204259	Q9NRY5	FAM114A2	459	Protein FAM114A2 [OS=Homo sapiens]
20.8177	21.3968	20.7859	21.2353	21.5287	20.404	3	1	21.0281	0.429397	0.0204202	P05543	SERPINA7	460	thyroxine-binding globulin [OS=Homo sapiens]
24.4123	25.2072	25.2068	25.2694	25.435	24.2154	26	26	24.9577	0.509452	0.0204126	O14974	PPP1R12A	461	Isoform 5 of Protein phosphatase 1 regulatory subunit 12A [OS=Homo sapiens]
20.1777	21.0317	21.015	21.0227	21.1452	20.3092	12	5	20.7836	0.423139	0.0203593	P26440	IVD	462	Isovaleryl-CoA dehydrogenase, mitochondrial [OS=Homo sapiens]
21.7573	20.8734	21.77	21.9826	21.9565	22.0676	5	2	21.7346	0.439353	0.0202145	P52788	SMS	463	Spermine synthase [OS=Homo sapiens]
19.5841	20.0089	19.3691	19.6884	19.3726	18.8343	14	5	19.4762	0.393598	0.0202091	Q9Y285	FARSA	464	Phenylalanine--tRNA ligase alpha subunit [OS=Homo sapiens]
20.6219	20.4782	20.8943	20.1509	19.8498	20.8758	18	4	20.4785	0.413221	0.0201783	Q8N1Q1	CA13	465	Carbonic anhydrase 13 [OS=Homo sapiens]
23.1177	22.575	22.5527	22.1828	21.9431	23.0082	15	9	22.5632	0.454967	0.0201641	P14923	JUP	466	Junction plakoglobin [OS=Homo sapiens]
22.1363	22.7193	22.9305	22.1727	22.8515	21.8337	17	7	22.4407	0.451489	0.0201192	Q8NE86	MCU	467	Calcium uniporter protein, mitochondrial [OS=Homo sapiens]
19.9204	20.4161	20.6605	20.5102	21.1827	20.3757	15	6	20.511	0.412221	0.0200976	P16930	FAH	468	Fumarylacetoacetase [OS=Homo sapiens]
20.7666	20.8101	21.0107	21.3749	21.747	21.6523	17	6	21.2269	0.425629	0.0200514	Q9Y371	SH3GLB1	469	Isoform 2 of Endophilin-B1 [OS=Homo sapiens]
23.7236	24.0582	23.9955	24.9093	23.5132	24.2169	14	10	24.0694	0.482031	0.0200267	P11940	PABPC1	470	Polyadenylate-binding protein 1 [OS=Homo sapiens]
17.7616	18.6907	17.9192	18.1882	18.5806	18.1937	2	1	18.2223	0.361632	0.0198455	Q8N4C8	MINK1	471	Misshapen-like kinase 1 [OS=Homo sapiens]
21.6697	22.1689	22.2432	21.5172	21.1412	21.4448	8	1	21.6975	0.430491	0.0198406	Q7Z5L0	VMO1	472	Vitelline membrane outer layer protein 1 homolog [OS=Homo sapiens]
19.1539	18.7334	19.26	19.1352	19.2797	18.3286	2	1	18.9818	0.376208	0.0198194	Q01415	GALK2	473	N-acetylgalactosamine kinase [OS=Homo sapiens]
22.4369	22.9803	22.0618	22.5254	22.3122	23.271	6	2	22.5979	0.447082	0.0197842	Q92905	COPS5	474	COP9 signalosome complex subunit 5 [OS=Homo sapiens]
22.2502	23.0144	22.6457	22.9733	23.1021	22.014	14	4	22.6666	0.448208	0.0197739	Q96FW1	OTUB1	475	Ubiquitin thioesterase otub1 [OS=Homo sapiens]
24.2344	23.6626	24.1825	23.6347	24.2032	24.94	14	3	24.1429	0.477048	0.0197593	P07477	PRSS1	476	Trypsin-1 [OS=Homo sapiens]
20.0925	20.7696	20.5918	20.5145	20.5905	19.7072	17	6	20.3777	0.398569	0.0195591	P46734	MAP2K3	477	dual specificity mitogen-activated protein kinase kinase 3 [OS=Homo sapiens]
19.9133	20.3525	20.3683	20.7392	20.6279	19.7259	20	7	20.2878	0.396501	0.0195437	P21283	ATP6V1C1	478	V-type proton ATPase subunit C 1 [OS=Homo sapiens]
27.4355	26.0758	26.9686	26.1058	26.7261	26.738	44	10	26.675	0.520432	0.0195101	Q04695	KRT17	479	Keratin, type I cytoskeletal 17 [OS=Homo sapiens]
22.2832	22.0467	21.8086	21.7029	21.9734	22.8983	25	10	22.1188	0.431334	0.0195007	Q7L1Q6	BZW1	480	Isoform 2 of Basic leucine zipper and W2 domain-containing protein 1 [OS=Homo sapiens]
18.6424	18.7058	18.8557	17.9943	18.8454	19.0427	14	1	18.681	0.363887	0.019479	P12035	KRT3	481	Keratin, type II cytoskeletal 3 [OS=Homo sapiens]
20.472	21.6719	20.9346	21.2549	20.8605	20.8723	8	3	21.011	0.408546	0.0194443	O60704	TPST2	482	Protein-tyrosine sulfotransferase 2 [OS=Homo sapiens]
21.165	21.6602	21.8143	20.9479	21.8939	21.0441	13	9	21.4209	0.416407	0.0194393	Q9C0I1	MTMR12	483	Myotubularin-related protein 12 [OS=Homo sapiens]
19.2063	18.9541	18.9546	19.0858	18.6425	19.748	14	1	19.0986	0.369634	0.019354	Q9NYM9	BET1L	484	BET1-like protein [OS=Homo sapiens]
17.2893	18.1676	18.1456	17.9196	18.1235	18.1768	4	1	17.9704	0.347033	0.0193114	Q9H0F6	SHARPIN	485	Sharpin [OS=Homo sapiens]
16.2121	16.2672	15.9706	16.5245	16.3289	15.6394	3	1	16.1571	0.310626	0.0192253	Q5TEU4	NDUFAF5	486	Arginine-hydroxylase NDUFAF5, mitochondrial [OS=Homo sapiens]
19.8879	18.9619	19.6764	19.0936	19.1176	19.1796	5	6	19.3195	0.371402	0.0192242	Q96K76	USP47	487	Isoform 4 of Ubiquitin carboxyl-terminal hydrolase 47 [OS=Homo sapiens]
18.4473	19.3656	18.9969	19.1793	19.3073	18.687	25	2	18.9972	0.364309	0.019177	P55774	CCL18	488	C-C motif chemokine 18 [OS=Homo sapiens]
22.4339	22.7023	22.9991	22.8937	23.699	22.6593	18	1	22.8979	0.438753	0.0191613	Q9UDY2	TJP2	489	Isoform 6 of Tight junction protein ZO-2 [OS=Homo sapiens]
22.3913	21.8419	22.0882	22.0916	21.6532	22.8483	13	5	22.1524	0.423022	0.019096	P04070	PROC	490	Vitamin K-dependent protein C [OS=Homo sapiens]
24.9988	25.7518	25.3406	25.9731	26.1152	25.0135	20	20	25.5322	0.484342	0.0189699	P05023	ATP1A1	491	Sodium/potassium-transporting ATPase subunit alpha-1 [OS=Homo sapiens]
21.2593	21.2831	20.7055	20.8484	20.6895	21.6943	14	4	21.08	0.39928	0.0189412	Q13126	MTAP	492	S-methyl-5'-thioadenosine phosphorylase [OS=Homo sapiens]
20.9768	21.8185	21.5925	21.1559	20.9202	20.8302	9	11	21.2157	0.400499	0.0188775	Q86UP2	KTN1	493	Isoform 2 of Kinectin [OS=Homo sapiens]
16.0209	16.8551	16.4978	16.1732	16.5847	16.2192	1	1	16.3918	0.309255	0.0188664	Q9BX69	CARD6	494	Caspase recruitment domain-containing protein 6 [OS=Homo sapiens]
19.6193	19.891	19.339	19.6911	19.8119	20.457	7	4	19.8015	0.373375	0.0188558	P28331	NDUFS1	495	Isoform 4 of NADH-ubiquinone oxidoreductase 75 kDa subunit, mitochondrial [OS=Homo sapiens]
22.8829	22.1009	22.1804	21.7771	21.8106	22.4594	4	5	22.2019	0.418161	0.0188345	Q01970	PLCB3	496	1-phosphatidylinositol 4,5-bisphosphate phosphodiesterase beta-3 [OS=Homo sapiens]
20.1088	19.2609	19.3766	19.8439	19.3853	20.0204	3	4	19.666	0.3688	0.0187532	Q6YHK3	CD109	497	CD109 antigen [OS=Homo sapiens]
21.2402	21.9351	21.2857	21.6423	21.2066	20.7724	31	3	21.3471	0.399541	0.0187164	P61956	SUMO2	498	small ubiquitin-related modifier 2 [OS=Homo sapiens]
23.4002	24.5437	23.3536	23.9073	23.8065	23.5279	42	12	23.7565	0.444169	0.0186967	P31150	GDI1	499	Rab GDP dissociation inhibitor alpha [OS=Homo sapiens]
19.3025	19.8892	19.7976	19.7745	19.3566	18.9627	4	2	19.5139	0.364009	0.0186538	Q9UBS0	RPS6KB2	500	Ribosomal protein S6 kinase beta-2 [OS=Homo sapiens]
20.0319	19.027	19.5319	19.4011	19.3597	19.8637	5	2	19.5359	0.363776	0.0186209	Q8N6T3	ARFGAP1	501	ADP-ribosylation factor GTPase-activating protein 1 [OS=Homo sapiens]
25.82	26.8019	26.486	26.8609	26.687	25.763	55	9	26.4031	0.491071	0.018599	O00194	RAB27B	502	ras-related protein rab-27b [OS=Homo sapiens]
19.3499	19.0387	19.2976	18.5189	18.5755	18.8984	3	1	18.9465	0.351384	0.0185461	Q9H1E5	TMX4	503	Thioredoxin-related transmembrane protein 4 [OS=Homo sapiens]
21.0039	21.7064	20.7989	20.8168	20.837	20.594	25	5	20.9595	0.388488	0.0185352	Q96FZ7	CHMP6	504	charged multivesicular body protein 6 [OS=Homo sapiens]
22.6423	22.3891	21.5492	22.6208	22.5766	22.4278	19	5	22.3676	0.414051	0.0185112	Q9BWP8	COLEC11	505	Collectin-11 [OS=Homo sapiens]
18.0682	18.2759	17.9241	17.9059	18.1617	17.3304	1	1	17.9444	0.332059	0.0185049	O15027	SEC16A	506	Protein transport protein Sec16A [OS=Homo sapiens]
22.2716	21.47	21.8245	21.2947	21.9337	21.261	4	1	21.6759	0.400801	0.0184906	Q9UHK6	AMACR	507	alpha-methylacyl-CoA racemase [OS=Homo sapiens]
21.1054	20.2352	20.7559	20.1532	20.7376	20.2727	14	4	20.5433	0.379272	0.018462	P55212	CASP6	508	Caspase-6 [OS=Homo sapiens]
16.0806	16.6616	16.1877	16.3505	16.5219	15.8394	2	2	16.2736	0.300406	0.0184597	Q9UP83	COG5	509	conserved oligomeric Golgi complex subunit 5 [OS=Homo sapiens]
23.1882	24.0297	23.6154	24.0052	23.8062	22.9779	22	10	23.6038	0.435469	0.0184491	Q9P270	SLAIN2	510	SLAIN motif-containing protein 2 [OS=Homo sapiens]
19.8505	20.1128	20.4623	19.6481	20.4771	19.6961	5	1	20.0412	0.369462	0.0184352	P04156	PRNP	511	Major prion protein [OS=Homo sapiens]
18.782	18.3684	18.6364	19.2447	18.5378	19.1469	12	7	18.786	0.346115	0.0184241	P48147	PREP	512	prolyl endopeptidase [OS=Homo sapiens]
19.6585	19.9334	18.9224	19.7176	19.7379	19.3678	9	4	19.5563	0.360292	0.0184234	P49758	RGS6	513	Isoform 3 of Regulator of G-protein signaling 6 [OS=Homo sapiens]
17.563	18.5199	18.024	18.2777	17.9723	17.8598	6	8	18.0361	0.33212	0.0184142	Q15075	EEA1	514	Early endosome antigen 1 [OS=Homo sapiens]
21.6043	21.3814	21.907	21.1876	21.0812	20.8037	15	5	21.3275	0.392413	0.0183993	P31689	DNAJA1	515	Isoform 2 of DnaJ homolog subfamily A member 1 [OS=Homo sapiens]
17.7832	18.071	18.0923	17.7771	17.6772	18.5735	1	4	17.9957	0.329589	0.0183148	Q8NEZ4	KMT2C	516	Isoform 3 of Histone-lysine N-methyltransferase 2C [OS=Homo sapiens]
17.6701	18.177	17.8386	17.5275	17.7221	17.2049	1	1	17.69	0.323251	0.0182731	O60266	ADCY3	517	Adenylate cyclase type 3 [OS=Homo sapiens]
18.288	18.6344	18.4969	18.926	19.2355	18.9209	2	1	18.7503	0.342574	0.0182703	Q15904	ATP6AP1	518	V-type proton ATPase subunit S1 [OS=Homo sapiens]
23.6599	24.2452	24.0143	24.758	24.7781	24.5271	2	2	24.3304	0.442432	0.0181843	Q8TDI8	TMC1	519	Transmembrane channel-like protein 1 [OS=Homo sapiens]
21.3393	22.3035	21.8815	22.0859	22.2754	21.5366	6	3	21.9037	0.39622	0.0180892	Q96M27	PRRC1	520	protein PRRC1 [OS=Homo sapiens]
21.5325	20.9588	21.6987	20.6538	21.1089	21.2743	11	9	21.2045	0.381965	0.0180134	Q9Y2L6	FRMD4B	521	FERM domain-containing protein 4B [OS=Homo sapiens]
18.676	18.9965	19.0047	19.2331	18.5158	18.3431	26	1	18.7949	0.338465	0.0180084	Q9NR12	PDLIM7	522	Isoform 2 of PDZ and LIM domain protein 7 [OS=Homo sapiens]
17.8152	18.1488	18.2585	18.0409	18.2823	17.4348	30	3	17.9967	0.323696	0.0179863	P69891	HBG1	523	Hemoglobin subunit gamma-1 [OS=Homo sapiens]
19.8017	20.8337	20.2655	20.6699	20.4488	20.2096	10	1	20.3715	0.366288	0.0179804	Q9H098	FAM107B	524	Protein FAM107B [OS=Homo sapiens]
20.9425	21.121	20.343	20.8907	20.6627	20.1609	9	2	20.6868	0.371715	0.0179687	P30536	TSPO	525	translocator protein [OS=Homo sapiens]
20.5261	20.3574	19.9638	20.1737	20.0802	19.4837	8	3	20.0975	0.361109	0.0179679	P00749	PLAU	526	Urokinase-type plasminogen activator [OS=Homo sapiens]
19.4871	19.358	18.9827	20.0255	19.7117	19.6043	4	1	19.5282	0.350737	0.0179605	O75663	TIPRL	527	TIP41-like protein [OS=Homo sapiens]
22.4145	22.4118	22.5365	22.5616	22.1275	23.3277	36	13	22.5633	0.404958	0.0179477	O75874	IDH1	528	Isocitrate dehydrogenase [NADP] cytoplasmic [OS=Homo sapiens]
18.2333	18.0802	17.5441	18.3095	18.4097	18.3948	17	4	18.1619	0.325873	0.0179426	P29966	MARCKS	529	Myristoylated alanine-rich C-kinase substrate [OS=Homo sapiens]
20.841	20.4883	20.8325	20.1368	20.6215	21.2322	5	1	20.692	0.371059	0.0179324	O75489	NDUFS3	530	NADH dehydrogenase [ubiquinone] iron-sulfur protein 3, mitochondrial [OS=Homo sapiens]
18.33	17.5897	18.2179	17.6075	18.0787	17.7508	10	1	17.9291	0.321501	0.0179318	Q9H1E1	RNASE7	531	Ribonuclease 7 [OS=Homo sapiens]
19.8429	20.1647	19.8376	19.8487	19.8176	20.7165	15	3	20.038	0.357511	0.0178416	Q7Z7H5	TMED4	532	Transmembrane emp24 domain-containing protein 4 [OS=Homo sapiens]
24.3665	25.0016	25.3661	25.164	25.7149	25.0468	2	6	25.11	0.447872	0.0178364	Q92794	KAT6A	533	histone acetyltransferase KAT6A [OS=Homo sapiens]
21.3779	21.366	21.051	21.6078	21.5714	22.2008	10	3	21.5291	0.383975	0.0178351	Q9H8H3	METTL7A	534	methyltransferase-like protein 7A [OS=Homo sapiens]
23.5548	23.3659	23.7103	23.2023	22.7355	22.7291	7	2	23.2163	0.412275	0.017758	Q6ICL3	TANGO2	535	transport and Golgi organization protein 2 homolog [OS=Homo sapiens]
22.07	22.9219	22.3052	22.9206	22.6263	22.0484	67	5	22.4821	0.398926	0.0177442	P02042	HBD	536	Hemoglobin subunit delta [OS=Homo sapiens]
21.6909	21.8794	21.6067	22.4906	22.0759	21.3969	22	5	21.8567	0.387765	0.0177412	Q8TEA8	DTD1	537	D-aminoacyl-tRNA deacylase 1 [OS=Homo sapiens]
21.1497	21.5089	21.1769	21.9871	21.7444	21.0329	20	3	21.4333	0.378333	0.0176516	A0A075B6I0	IGLV8-61	538	immunoglobulin lambda variable 8-61 [OS=Homo sapiens]
22.3886	21.9885	23.0555	22.1154	22.7266	22.36	16	4	22.4391	0.394761	0.0175925	P20645	M6PR	539	Cation-dependent mannose-6-phosphate receptor [OS=Homo sapiens]
23.1158	23.3564	23.3585	22.8902	24.0426	23.0221	24	4	23.2976	0.409165	0.0175625	Q14203	DCTN1	540	Isoform p135 of Dynactin subunit 1 [OS=Homo sapiens]
19.5117	20.1461	19.847	19.2638	19.8742	20.1247	31	5	19.7946	0.347375	0.017549	P80723	BASP1	541	Brain acid soluble protein 1 [OS=Homo sapiens]
23.7905	23.3961	23.6443	24.1113	23.0169	24.0581	8	7	23.6695	0.415225	0.0175426	Q9UHB6	LIMA1	542	LIM domain and actin-binding protein 1 [OS=Homo sapiens]
20.2994	20.0227	19.601	20.2484	19.8051	19.4362	22	2	19.9021	0.349131	0.0175424	P01743	IGHV1-46	543	immunoglobulin heavy variable 1-46 [OS=Homo sapiens]
21.6579	21.3653	20.6384	21.5537	21.4085	21.5883	25	5	21.3687	0.374436	0.0175226	P28072	PSMB6	544	Proteasome subunit beta type-6 [OS=Homo sapiens]
25.0306	24.0945	24.947	24.2082	24.8314	25.072	9	3	24.6973	0.432311	0.0175044	P48509	CD151	545	CD151 antigen [OS=Homo sapiens]
22.1385	22.4358	22.7698	22.571	22.4176	21.6546	12	5	22.3312	0.390707	0.017496	P12955	PEPD	546	xaa-Pro dipeptidase [OS=Homo sapiens]
20.3913	21.0406	20.9132	20.8895	20.1996	20.3256	12	3	20.6266	0.360829	0.0174934	Q9GZY8	MFF	547	Isoform 5 of Mitochondrial fission factor [OS=Homo sapiens]
23.0253	23.0162	22.8054	22.8868	22.9739	23.9073	37	5	23.1025	0.403101	0.0174484	Q96A00	PPP1R14A	548	Protein phosphatase 1 regulatory subunit 14A [OS=Homo sapiens]
20.1329	19.5227	20.1797	19.8709	20.026	19.3284	4	4	19.8434	0.346147	0.0174439	A1A4S6	ARHGAP10	549	Rho GTPase-activating protein 10 [OS=Homo sapiens]
21.3469	21.1944	20.6678	21.1955	21.2004	20.4324	19	4	21.0062	0.365733	0.0174107	Q9HCN6	GP6	550	Platelet glycoprotein VI [OS=Homo sapiens]
21.6333	22.3681	22.2855	22.726	22.2539	21.8673	22	4	22.189	0.386314	0.0174102	P30085	CMPK1	551	UMP-CMP kinase [OS=Homo sapiens]
25.4856	24.6493	24.7111	24.8495	24.8944	25.6979	19	3	25.048	0.435742	0.0173963	P06703	S100A6	552	protein S100-A6 [OS=Homo sapiens]
25.1577	25.4789	25.2909	26.2774	25.2557	25.0667	38	21	25.4212	0.441797	0.0173791	P11413	G6PD	553	Glucose-6-phosphate 1-dehydrogenase [OS=Homo sapiens]
25.3685	24.341	25.2398	24.3517	24.7987	24.8948	77	7	24.8324	0.431518	0.0173772	P01040	CSTA	554	Cystatin-A [OS=Homo sapiens]
17.9791	18.2691	18.6915	18.3871	18.53	17.8668	3	1	18.2873	0.317631	0.017369	P50579	METAP2	555	methionine aminopeptidase 2 [OS=Homo sapiens]
19.4832	19.4868	18.7342	19.4376	19.5718	19.6776	2	1	19.3985	0.336382	0.0173406	Q8TE85	GRHL3	556	grainyhead-like protein 3 homolog [OS=Homo sapiens]
21.2948	21.7294	21.1954	21.1042	22.0421	21.2162	18	7	21.4303	0.371364	0.0173289	Q9Y6N5	SQOR	557	Sulfide:quinone oxidoreductase, mitochondrial [OS=Homo sapiens]
19.2123	18.9616	18.8215	19.2121	18.4863	19.394	3	1	19.0146	0.329007	0.0173028	P21731	TBXA2R	558	Thromboxane A2 receptor [OS=Homo sapiens]
17.8688	18.5173	17.7156	17.7825	17.7322	17.758	3	1	17.8958	0.309215	0.0172787	O95497	VNN1	559	Pantetheinase [OS=Homo sapiens]
21.1208	20.3508	21.1521	20.6942	20.7342	21.3096	20	1	20.8936	0.360916	0.017274	Q99719	SEPTIN5	560	Isoform 2 of Septin-5 [OS=Homo sapiens]
22.2787	21.3076	22.0117	21.353	21.7707	21.812	8	7	21.7556	0.375637	0.0172662	Q4V328	GRIPAP1	561	GRIP1-associated protein 1 [OS=Homo sapiens]
18.8916	18.8822	18.7946	18.4578	18.5541	18.0617	25	3	18.607	0.320745	0.0172378	O75368	SH3BGRL	562	SH3 domain-binding glutamic acid-rich-like protein [OS=Homo sapiens]
20.3021	21.1308	20.3424	20.2505	20.3975	20.8175	11	3	20.5402	0.353786	0.0172241	O14579	COPE	563	coatomer subunit epsilon [OS=Homo sapiens]
24.8077	23.9706	25.0387	25.0051	25.1304	24.9174	16	6	24.8116	0.426426	0.0171866	O00232	PSMD12	564	26s proteasome non-atpase regulatory subunit 12 [OS=Homo sapiens]
20.5542	21.3793	20.5318	20.6674	21.041	20.4908	1	2	20.7774	0.356685	0.017167	O94966	USP19	565	Isoform 7 of Ubiquitin carboxyl-terminal hydrolase 19 [OS=Homo sapiens]
19.2955	18.9413	19.3421	18.9977	18.4502	19.174	5	2	19.0335	0.326707	0.0171649	Q5VZF2	MBNL2	566	muscleblind-like protein 2 [OS=Homo sapiens]
24.2013	24.144	23.2677	24.4726	24.2052	24.1484	26	5	24.0732	0.412996	0.0171559	Q9UFN0	NIPSNAP3A	567	protein NipSnap homolog 3A [OS=Homo sapiens]
21.9152	22.3448	21.7919	22.6788	22.7217	22.2939	30	5	22.2911	0.381875	0.0171313	P59998	ARPC4	568	Actin-related protein 2/3 complex subunit 4 [OS=Homo sapiens]
20.0154	19.9855	20.8647	20.5093	20.4892	20.6403	8	4	20.4174	0.34972	0.0171285	Q9NSD9	FARSB	569	Phenylalanine--tRNA ligase beta subunit [OS=Homo sapiens]
19.9539	19.1777	20.0004	19.9832	19.4558	19.7696	13	7	19.7234	0.337273	0.0171001	Q8WWZ8	OIT3	570	Oncoprotein-induced transcript 3 protein [OS=Homo sapiens]
21.9345	21.8682	21.0976	21.6629	21.6245	22.1865	15	6	21.729	0.370122	0.0170335	Q5VW32	BROX	571	BRO1 domain-containing protein BROX [OS=Homo sapiens]
22.2112	22.7904	22.4273	23.031	22.9847	22.1646	27	3	22.6015	0.384845	0.0170274	P06331	IGHV4-34	572	immunoglobulin heavy variable 4-34 [OS=Homo sapiens]
21.1486	21.0096	21.5751	20.9127	21.6698	21.7464	17	7	21.3437	0.362634	0.0169902	P52594	AGFG1	573	Isoform 2 of Arf-GAP domain and FG repeat-containing protein 1 [OS=Homo sapiens]
21.6497	20.8995	21.6154	21.7664	21.9435	21.7811	15	7	21.6093	0.366439	0.0169575	P80303	NUCB2	574	Nucleobindin-2 [OS=Homo sapiens]
21.4231	20.5592	21.0439	21.0033	21.2902	21.5521	11	5	21.1453	0.357097	0.0168878	Q96S66	CLCC1	575	chloride channel CLIC-like protein 1 [OS=Homo sapiens]
22.9452	22.0887	22.1448	22.8454	22.7174	22.856	23	1	22.5996	0.381401	0.0168765	P62879	GNB2	576	Guanine nucleotide-binding protein G(I)/G(S)/G(T) subunit beta-2 [OS=Homo sapiens]
19.4478	19.7606	19.4466	18.7784	19.5198	19.4246	8	3	19.3963	0.327322	0.0168755	O95319	CELF2	577	CUGBP Elav-like family member 2 [OS=Homo sapiens]
19.9339	20.4481	20.5008	20.6731	20.7816	20.0232	26	4	20.3934	0.343995	0.0168679	Q96E17	RAB3C	578	ras-related protein Rab-3C [OS=Homo sapiens]
22.9616	23.189	22.3578	22.8583	23.1558	22.3149	22	3	22.8063	0.384216	0.016847	P14174	MIF	579	Macrophage Migration inhibitory factor [OS=Homo sapiens]
22.1523	22.1333	22.0932	22.4493	23.0945	22.4156	14	2	22.3897	0.377083	0.0168418	P30049	ATP5F1D	580	ATP synthase subunit delta, mitochondrial [OS=Homo sapiens]
21.8132	21.0398	21.0236	21.079	20.907	20.8319	40	5	21.1158	0.353884	0.0167592	P28161	GSTM2	581	Glutathione S-transferase Mu 2 [OS=Homo sapiens]
26.6732	25.7491	26.2508	25.6187	25.8058	25.5495	20	2	25.9412	0.4346	0.0167533	P09669	COX6C	582	Cytochrome c oxidase subunit 6C [OS=Homo sapiens]
22.1401	21.3683	21.9905	21.4528	21.7676	22.2619	18	7	21.8302	0.365474	0.0167417	Q8TD55	PLEKHO2	583	pleckstrin homology domain-containing family O member 2 [OS=Homo sapiens]
19.7796	18.9684	19.0864	19.0971	19.4524	18.9865	4	1	19.2284	0.321705	0.0167307	O75439	PMPCB	584	mitochondrial-processing peptidase subunit beta [OS=Homo sapiens]
22.8062	23.5478	22.9257	23.206	23.1407	22.4231	38	11	23.0083	0.384151	0.0166962	P36959	GMPR	585	GMP reductase 1 [OS=Homo sapiens]
24.9381	25.1068	25.1208	25.1021	25.8849	25.8637	17	17	25.3361	0.422303	0.0166681	P17301	ITGA2	586	Integrin alpha-2 [OS=Homo sapiens]
23.4427	23.3753	23.4435	23.5555	24.3436	23.2518	40	5	23.5687	0.392418	0.0166499	Q8WWA1	TMEM40	587	Isoform 2 of Transmembrane protein 40 [OS=Homo sapiens]
19.5192	19.8249	19.3171	19.7562	20.2888	19.6835	6	2	19.7316	0.328332	0.0166399	Q14232	EIF2B1	588	Translation initiation factor eIF-2B subunit alpha [OS=Homo sapiens]
22.5916	23.0264	22.9787	23.2166	23.056	22.1939	29	11	22.8439	0.379876	0.0166292	P43034	PAFAH1B1	589	Platelet-activating factor acetylhydrolase IB subunit alpha [OS=Homo sapiens]
20.837	21.1269	20.9774	20.8983	20.9736	20.1492	8	6	20.8271	0.346045	0.0166152	Q15436	SEC23A	590	protein transport protein Sec23A [OS=Homo sapiens]
20.7655	20.7019	19.9419	20.8611	20.7616	20.4606	20	3	20.5821	0.341384	0.0165865	O15173	PGRMC2	591	Membrane-associated progesterone receptor component 2 [OS=Homo sapiens]
20.5003	21.012	20.3881	21.0637	21.1149	20.4366	2	1	20.7526	0.344017	0.0165771	Q15006	EMC2	592	ER membrane protein complex subunit 2 [OS=Homo sapiens]
18.7628	19.3637	18.9666	19.2258	18.8362	19.5657	4	1	19.1201	0.316535	0.0165551	Q9UNE7	STUB1	593	E3 ubiquitin-protein ligase CHIP [OS=Homo sapiens]
21.3403	21.9205	21.404	21.8016	22.1529	21.282	19	5	21.6502	0.358016	0.0165364	P53801	PTTG1IP	594	pituitary tumor-transforming gene 1 protein-interacting protein [OS=Homo sapiens]
18.7427	18.4455	18.8537	18.1056	18.9058	18.7946	3	1	18.6413	0.307972	0.0165209	Q07108	CD69	595	Early activation antigen CD69 [OS=Homo sapiens]
19.965	20.3316	19.7083	20.2362	20.5871	20.5074	4	3	20.2226	0.33373	0.0165029	O95373	IPO7	596	Importin-7 [OS=Homo sapiens]
22.7747	22.5504	22.389	23.0263	21.9776	22.821	22	5	22.5898	0.372793	0.0165027	P02753	RBP4	597	Retinol-binding protein 4 [OS=Homo sapiens]
22.4764	22.9452	22.4088	22.2466	22.2556	23.1312	10	4	22.5773	0.372445	0.0164965	P35580	MYH10	598	Isoform 2 of Myosin-10 [OS=Homo sapiens]
24.1746	23.8627	23.7432	23.5129	23.3118	24.354	18	22	23.8265	0.392646	0.0164793	P53621	COPA	599	coatomer subunit alpha [OS=Homo sapiens]
21.9755	22.4323	22.2068	21.8224	21.7341	21.4094	4	3	21.9301	0.361107	0.0164663	Q96SU4	OSBPL9	600	Oxysterol-binding protein-related protein 9 [OS=Homo sapiens]
22.9802	22.1035	22.4409	22.0944	22.389	22.8462	16	5	22.4757	0.369968	0.0164608	P20042	EIF2S2	601	Eukaryotic translation initiation factor 2 subunit 2 [OS=Homo sapiens]
18.5996	19.3612	19.0163	19.1701	19.0055	18.5781	3	1	18.9551	0.311753	0.0164469	Q13501	SQSTM1	602	sequestosome-1 [OS=Homo sapiens]
25.6085	24.8392	25.2844	24.811	24.4289	24.9338	35	3	24.9843	0.410331	0.0164236	A0A0B4J1V0	IGHV3-15	603	Immunoglobulin heavy variable 3-15 [OS=Homo sapiens]
22.0623	22.7377	22.0428	22.7288	22.7309	22.0801	15	8	22.3971	0.367599	0.0164128	Q9UK55	SERPINA10	604	Protein Z-dependent protease inhibitor [OS=Homo sapiens]
22.8758	22.6554	22.1189	22.8409	22.0406	22.7437	40	8	22.5459	0.37001	0.0164114	O15400	STX7	605	Isoform 2 of Syntaxin-7 [OS=Homo sapiens]
21.6904	21.2969	21.3379	21.457	21.9262	22.1918	28	7	21.65	0.355171	0.0164051	P28062	PSMB8	606	Proteasome subunit beta type-8 [OS=Homo sapiens]
17.537	18.2606	17.9805	17.9523	17.5663	17.6098	2	2	17.8177	0.291887	0.0163818	Q8N766	EMC1	607	ER membrane protein complex subunit 1 [OS=Homo sapiens]
21.3316	20.7429	20.8958	20.4324	20.5782	20.4549	43	2	20.7393	0.33951	0.0163704	P35326	SPRR2A	608	Small proline-rich protein 2A [OS=Homo sapiens]
18.9739	18.8076	19.3023	19.3532	19.4054	18.665	1	2	19.0846	0.312245	0.0163611	Q6P996	PDXDC1	609	Pyridoxal-dependent decarboxylase domain-containing protein 1 [OS=Homo sapiens]
22.4106	21.5283	21.8729	21.6629	21.8494	22.3425	14	8	21.9445	0.35844	0.016334	Q86TP1	PRUNE1	610	Exopolyphosphatase PRUNE1 [OS=Homo sapiens]
21.3285	22.0061	21.4201	21.9336	21.2359	21.2365	6	3	21.5268	0.350661	0.0162895	Q96JJ7	TMX3	611	Protein disulfide-isomerase TMX3 [OS=Homo sapiens]
21.7196	21.7763	21.4368	22.2025	21.2387	21.3643	15	7	21.623	0.351529	0.0162572	P04424	ASL	612	argininosuccinate lyase [OS=Homo sapiens]
23.9755	23.9791	23.9623	24.6548	24.8163	24.01	33	7	24.233	0.392933	0.0162148	Q9NY65	TUBA8	613	Tubulin alpha-8 chain [OS=Homo sapiens]
24.6856	23.8377	24.5623	24.9505	24.8635	24.7053	36	10	24.6008	0.39832	0.0161913	Q14141	SEPTIN6	614	Isoform V of Septin-6 [OS=Homo sapiens]
23.485	22.6301	22.9034	22.5096	22.7178	23.1944	9	13	22.9067	0.370686	0.0161824	Q5D862	FLG2	615	Filaggrin-2 [OS=Homo sapiens]
20.1655	19.4896	20.2141	20.1215	20.4716	20.0951	10	5	20.0929	0.325004	0.0161751	O95260	ATE1	616	Arginyl-tRNA--protein transferase 1 [OS=Homo sapiens]
24.1972	23.3084	23.6258	23.3248	23.3926	24.0175	38	11	23.6444	0.380416	0.0160891	P50402	EMD	617	Emerin [OS=Homo sapiens]
20.4303	20.7842	19.9431	20.6859	20.7065	20.8088	20	4	20.5598	0.330704	0.016085	Q96BS2	TESC	618	calcineurin B homologous protein 3 [OS=Homo sapiens]
19.6594	19.6348	20.0827	20.4175	19.7616	19.6375	13	2	19.8656	0.319494	0.0160828	O95989	NUDT3	619	Diphosphoinositol polyphosphate phosphohydrolase 1 [OS=Homo sapiens]
21.6822	20.8944	21.1507	21.5817	21.2456	21.7701	4	2	21.3875	0.343588	0.0160649	Q96A33	CCDC47	620	Coiled-coil domain-containing protein 47 [OS=Homo sapiens]
19.9562	20.3904	19.6799	20.3351	20.3293	19.7321	6	2	20.0705	0.322325	0.0160596	Q16186	ADRM1	621	Proteasomal ubiquitin receptor ADRM1 [OS=Homo sapiens]
21.3237	21.5959	21.4059	21.5701	21.1985	20.6667	34	3	21.2935	0.341554	0.0160403	P04080	CSTB	622	Cystatin-B [OS=Homo sapiens]
30.2395	29.0224	29.7824	29.0257	29.3868	29.6645	41	23	29.5202	0.47268	0.0160121	P13645	KRT10	623	Keratin, type I cytoskeletal 10 [OS=Homo sapiens]
24.7772	24.7295	25.1163	24.8524	24.8497	25.7898	25	4	25.0191	0.400563	0.0160103	P23142	FBLN1	624	Fibulin-1 [OS=Homo sapiens]
25.4533	26.2676	25.886	26.0904	26.1803	25.2531	47	19	25.8551	0.413782	0.0160039	Q08495	DMTN	625	Dematin [OS=Homo sapiens]
17.5257	17.6857	18.0637	17.6229	17.769	17.2076	4	1	17.6458	0.28229	0.0159976	Q68D91	MBLAC2	626	Metallo-beta-lactamase domain-containing protein 2 [OS=Homo sapiens]
18.4955	18.0924	18.111	18.1232	17.9468	18.7095	22	5	18.2464	0.29103	0.01595	P23919	DTYMK	627	thymidylate kinase [OS=Homo sapiens]
19.9912	19.8199	19.681	19.2458	19.2187	19.7011	7	3	19.6096	0.312576	0.0159399	Q9UJW0	DCTN4	628	Dynactin subunit 4 [OS=Homo sapiens]
19.5281	19.5539	19.0526	19.565	19.6638	18.9306	3	1	19.3823	0.308576	0.0159205	Q96HD1	CRELD1	629	Cysteine-rich with EGF-like domain protein 1 [OS=Homo sapiens]
21.9543	20.9235	21.5024	21.4343	21.2238	21.363	15	3	21.4002	0.340133	0.0158939	Q9NZT1	CALML5	630	Calmodulin-like protein 5 [OS=Homo sapiens]
22.1266	21.3733	22.0505	21.3621	21.8915	22.0196	22	8	21.8039	0.346357	0.0158851	P05198	EIF2S1	631	Eukaryotic translation initiation factor 2 subunit 1 [OS=Homo sapiens]
16.9541	17.28	16.9725	16.537	17.0708	17.2533	2	1	17.0113	0.26982	0.0158612	Q9HC07	TMEM165	632	Transmembrane protein 165 [OS=Homo sapiens]
19.2194	19.4958	19.1779	19.5141	18.8152	18.8405	14	1	19.1772	0.30369	0.015836	P04430	IGKV1-16	633	Immunoglobulin kappa variable 1-16 [OS=Homo sapiens]
22.0085	21.9327	21.8945	21.4797	21.1248	21.8578	29	5	21.7163	0.343464	0.0158159	P61081	UBE2M	634	NEDD8-conjugating enzyme Ubc12 [OS=Homo sapiens]
18.7486	18.8387	19.3885	18.5912	18.8394	19.1999	4	2	18.9344	0.299036	0.0157933	Q9BYM8	RBCK1	635	ranBP-type and C3HC4-type zinc finger-containing protein 1 [OS=Homo sapiens]
19.028	19.5479	19.2295	19.5511	19.5785	18.8746	5	2	19.3016	0.303992	0.0157496	P05121	SERPINE1	636	Plasminogen activator inhibitor 1 [OS=Homo sapiens]
22.2603	21.8614	22.1193	21.779	21.8273	22.6848	24	4	22.0887	0.346889	0.0157044	O96000	NDUFB10	637	NADH dehydrogenase [ubiquinone] 1 beta subcomplex subunit 10 [OS=Homo sapiens]
19.4746	19.9923	19.7085	19.8743	19.4757	19.1493	21	1	19.6124	0.307987	0.0157037	P04921	GYPC	638	Glycophorin-C [OS=Homo sapiens]
23.0041	23.5449	22.6546	23.3659	23.4923	22.8859	17	9	23.158	0.362156	0.0156385	P01008	SERPINC1	639	Antithrombin-III [OS=Homo sapiens]
21.5394	21.8427	21.5817	21.835	21.7048	22.4777	21	4	21.8302	0.341051	0.0156229	P13747	HLA-E	640	HLA class I histocompatibility antigen, alpha chain E [OS=Homo sapiens]
17.7788	18.2671	17.5718	17.479	17.6567	17.7607	2	1	17.7523	0.276479	0.0155743	Q9Y305	ACOT9	641	Acyl-coenzyme A thioesterase 9, mitochondrial [OS=Homo sapiens]
22.8773	23.5248	22.9023	23.6346	23.6601	23.1301	20	4	23.2882	0.362493	0.0155655	P62136	PPP1CA	642	serine/threonine-protein phosphatase PP1-alpha catalytic subunit [OS=Homo sapiens]
20.3475	20.1449	19.7207	20.4576	20.296	20.642	9	3	20.2681	0.315476	0.0155651	O75787	ATP6AP2	643	Renin receptor [OS=Homo sapiens]
21.5891	21.1124	21.528	21.1308	21.6466	21.9906	14	9	21.4996	0.333901	0.0155306	Q5JSP0	FGD3	644	FYVE, RhoGEF and PH domain-containing protein 3 [OS=Homo sapiens]
18.2305	17.9486	18.0189	17.4607	18.1495	18.146	3	1	17.9924	0.279393	0.0155284	P31641	SLC6A6	645	Sodium- and chloride-dependent taurine transporter [OS=Homo sapiens]
23.3717	23.1441	23.1229	22.5063	22.5361	23.1027	12	8	22.964	0.356577	0.0155277	Q02108	GUCY1A1	646	Guanylate cyclase soluble subunit alpha-3 [OS=Homo sapiens]
22.9866	23.607	22.8575	23.6392	23.5415	22.9895	62	2	23.2702	0.361306	0.0155265	P0CF74	IGLC6	647	Immunoglobulin lambda constant 6 [OS=Homo sapiens]
19.1503	18.8782	19.3216	19.3442	19.0252	19.7287	5	3	19.2413	0.297136	0.0154426	Q9Y5X1	SNX9	648	Sorting nexin-9 [OS=Homo sapiens]
18.3046	19.0526	18.3141	18.7139	18.4515	18.6527	10	5	18.5816	0.286222	0.0154036	P56181	NDUFV3	649	Isoform 2 of NADH dehydrogenase [ubiquinone] flavoprotein 3, mitochondrial [OS=Homo sapiens]
22.1425	21.7651	22.0678	22.5434	22.6019	22.5718	17	7	22.2821	0.342687	0.0153795	O75695	RP2	650	Protein XRP2 [OS=Homo sapiens]
19.4086	18.9934	18.9355	19.5682	19.188	18.8045	23	3	19.1497	0.29431	0.0153689	Q8WUD1	RAB2B	651	Ras-related protein Rab-2B [OS=Homo sapiens]
21.54	21.7277	20.9837	21.5022	21.9741	21.4272	12	15	21.5258	0.330494	0.0153534	Q9BZF9	UACA	652	Uveal autoantigen with coiled-coil domains and ankyrin repeats [OS=Homo sapiens]
22.5441	22.8085	22.4756	22.6859	22.5071	21.8176	24	8	22.4731	0.344571	0.0153326	Q13043	STK4	653	serine/threonine-protein kinase 4 [OS=Homo sapiens]
24.636	24.7606	25.2361	25.2447	25.4865	24.5617	57	4	24.9876	0.38297	0.0153264	P63167	DYNLL1	654	Dynein light chain 1, cytoplasmic [OS=Homo sapiens]
20.5317	20.3157	20.3454	20.2697	20.168	21.0315	3	1	20.4437	0.311648	0.0152443	Q8IVE0	CROCCP3	655	Putative ciliary rootlet coiled-coil protein-like 2 protein [OS=Homo sapiens]
22.6713	23.4663	23.2688	23.535	23.4827	22.9141	19	4	23.223	0.353791	0.0152345	Q9HB71	CACYBP	656	Calcyclin-binding protein [OS=Homo sapiens]
20.4404	20.4034	20.3544	20.982	20.8159	20.1456	12	11	20.5236	0.312544	0.0152285	Q99460	PSMD1	657	26S proteasome non-ATPase regulatory subunit 1 [OS=Homo sapiens]
29.6687	28.6039	29.2847	28.8007	29.1711	29.6943	66	32	29.2039	0.444248	0.015212	P35908	KRT2	658	Keratin, type II cytoskeletal 2 epidermal [OS=Homo sapiens]
22.4136	22.2931	22.4795	21.5645	21.9911	22.1611	54	7	22.1505	0.336663	0.0151989	Q01469	FABP5	659	Fatty acid-binding protein, epidermal [OS=Homo sapiens]
21.1003	21.1776	21.1935	21.263	20.402	20.9326	6	4	21.0115	0.31925	0.015194	P20742	PZP	660	Pregnancy zone protein [OS=Homo sapiens]
24.9945	25.2544	25.9864	25.1303	25.0621	24.9681	22	12	25.2326	0.383372	0.0151935	P05771	PRKCB	661	Isoform Beta-II of Protein kinase C beta type [OS=Homo sapiens]
20.0173	20.4863	20.764	19.9497	20.1848	20.183	21	5	20.2642	0.307211	0.0151603	Q9NQR4	NIT2	662	Omega-amidase NIT2 [OS=Homo sapiens]
22.2748	22.8937	22.3473	22.5755	22.6823	21.9308	7	3	22.4507	0.339821	0.0151363	Q99442	SEC62	663	translocation protein sec62 [OS=Homo sapiens]
18.8762	19.1334	19.0353	19.4707	19.0085	18.6052	2	1	19.0215	0.286029	0.0150371	Q8ND56	LSM14A	664	protein LSM14 homolog A [OS=Homo sapiens]
22.1863	21.6086	21.4656	21.8572	21.503	22.1817	35	2	21.8004	0.327086	0.0150036	A0A0C4DH38	IGHV5-51	665	immunoglobulin heavy variable 5-51 [OS=Homo sapiens]
23.88	24.1325	23.3211	24.2216	24.1984	23.6559	14	14	23.9016	0.35823	0.0149877	P14543	NID1	666	Nidogen-1 [OS=Homo sapiens]
21.5099	21.4785	21.8107	21.5669	21.8203	20.9372	8	4	21.5206	0.321965	0.0149608	Q6XQN6	NAPRT	667	nicotinate phosphoribosyltransferase [OS=Homo sapiens]
26.6971	27.4802	26.7477	27.7379	27.1193	27.1151	34	59	27.1495	0.405922	0.0149513	Q13576	IQGAP2	668	Ras GTPase-activating-like protein IQGAP2 [OS=Homo sapiens]
18.6534	19.0098	19.1941	18.8916	18.3952	18.7422	3	1	18.8144	0.281116	0.0149415	P15907	ST6GAL1	669	Beta-galactoside alpha-2,6-sialyltransferase 1 [OS=Homo sapiens]
24.2866	24.6628	24.72	24.6519	24.4689	23.7559	28	4	24.4243	0.364356	0.0149177	Q15771	RAB30	670	Ras-related protein Rab-30 [OS=Homo sapiens]
18.1677	18.9753	18.4813	18.629	18.6134	18.3466	9	2	18.5356	0.276462	0.0149152	P13861	PRKAR2A	671	cAMP-dependent protein kinase type II-alpha regulatory subunit [OS=Homo sapiens]
21.0931	21.8161	21.2784	21.6727	21.4863	21.0199	9	2	21.3944	0.318812	0.0149017	Q86Y82	STX12	672	Syntaxin-12 [OS=Homo sapiens]
19.5742	20.1285	20.3998	20.1625	20.2265	19.8318	10	6	20.0539	0.298728	0.0148963	Q9NRW7	VPS45	673	Isoform 2 of Vacuolar protein sorting-associated protein 45 [OS=Homo sapiens]
23.4799	22.9725	23.5633	22.6721	23.2079	23.4455	7	11	23.2236	0.345772	0.0148888	Q5SW79	CEP170	674	Centrosomal protein of 170 kDa [OS=Homo sapiens]
22.1125	22.6801	22.405	22.3913	22.5743	21.7721	11	3	22.3226	0.331631	0.0148563	Q15631	TSN	675	Translin [OS=Homo sapiens]
21.253	21.564	21.4982	20.8943	20.8129	21.0285	15	3	21.1751	0.314096	0.0148333	P61077	UBE2D3	676	Isoform 3 of Ubiquitin-conjugating enzyme E2 D3 [OS=Homo sapiens]
19.0421	19.072	18.9353	18.7755	19.101	18.3652	5	2	18.8819	0.279645	0.0148103	P17174	GOT1	677	Aspartate aminotransferase, cytoplasmic [OS=Homo sapiens]
19.4515	19.8819	19.4508	19.88	19.7843	19.1699	4	1	19.6031	0.290184	0.014803	P19256	CD58	678	Lymphocyte function-associated antigen 3 [OS=Homo sapiens]
18.5787	17.7985	18.0921	18.1748	18.2471	17.9561	2	1	18.1412	0.267545	0.0147479	Q16534	HLF	679	Hepatic leukemia factor [OS=Homo sapiens]
22.5162	22.355	22.9072	22.9423	22.4603	22.0771	19	3	22.543	0.332282	0.0147399	P13693	TPT1	680	Translationally-controlled tumor protein [OS=Homo sapiens]
21.0547	21.2275	21.3985	21.1511	21.4179	21.9402	24	5	21.365	0.314879	0.0147381	P25942	CD40	681	Tumor necrosis factor receptor superfamily member 5 [OS=Homo sapiens]
21.5606	21.7638	21.3208	21.1524	22.0213	21.7473	11	6	21.5944	0.318027	0.0147273	Q9UEY8	ADD3	682	Gamma-adducin [OS=Homo sapiens]
16.9777	16.8779	16.9064	16.4972	17.2684	16.8335	7	2	16.8935	0.248479	0.0147085	P78356	PIP4K2B	683	Phosphatidylinositol 5-phosphate 4-kinase type-2 beta [OS=Homo sapiens]
19.4127	20.1648	19.5675	19.9966	20.0344	19.8578	3	1	19.839	0.29156	0.0146963	Q12765	SCRN1	684	Secernin-1 [OS=Homo sapiens]
19.1966	19.2463	19.6086	18.9074	18.8875	18.9338	11	1	19.13	0.280673	0.0146719	O43676	NDUFB3	685	NADH dehydrogenase [ubiquinone] 1 beta subcomplex subunit 3 [OS=Homo sapiens]
22.4979	23.0779	22.2008	22.8366	22.7049	22.3092	14	4	22.6045	0.331547	0.0146673	P53007	SLC25A1	686	Tricarboxylate transport protein, mitochondrial [OS=Homo sapiens]
18.6615	18.8097	18.8116	19.3984	18.7508	18.6697	4	1	18.8503	0.276305	0.0146579	O75381	PEX14	687	Peroxisomal membrane protein PEX14 [OS=Homo sapiens]
20.6602	20.8335	20.6089	21.1042	21.4091	20.7573	12	11	20.8955	0.305865	0.0146378	P27816	MAP4	688	Isoform 6 of Microtubule-associated protein 4 [OS=Homo sapiens]
23.6236	23.6197	23.6611	23.9856	23.5883	24.4698	3	10	23.8247	0.34847	0.0146264	Q02224	CENPE	689	Centromere-associated protein E [OS=Homo sapiens]
23.0162	23.9688	23.2711	23.6082	23.5991	23.2257	14	9	23.4482	0.342619	0.0146118	O00534	VWA5A	690	von Willebrand factor A domain-containing protein 5A [OS=Homo sapiens]
19.1745	18.9844	18.5285	19.2848	19.0543	19.2493	7	3	19.046	0.278059	0.0145993	O43493	TGOLN2	691	Trans-Golgi network integral membrane protein 2 [OS=Homo sapiens]
17.2075	17.7877	17.9485	17.7834	17.6493	17.81	3	1	17.6977	0.258308	0.0145955	P35222	CTNNB1	692	Catenin beta-1 [OS=Homo sapiens]
19.782	20.0819	19.791	19.4297	20.265	19.986	2	3	19.8893	0.289827	0.014572	Q8TEW0	PARD3	693	Partitioning defective 3 homolog [OS=Homo sapiens]
23.1482	23.774	22.9679	23.1798	22.817	22.9707	18	11	23.1429	0.336519	0.0145409	P04196	HRG	694	Histidine-rich glycoprotein [OS=Homo sapiens]
21.2568	21.2465	21.1019	21.4865	20.892	21.7831	6	5	21.2945	0.309346	0.0145271	P55884	EIF3B	695	Isoform 2 of Eukaryotic translation initiation factor 3 subunit B [OS=Homo sapiens]
23.302	23.6233	23.2638	23.4246	22.7277	23.663	19	9	23.3341	0.338722	0.0145162	P42768	WAS	696	Wiskott-Aldrich syndrome protein [OS=Homo sapiens]
23.2414	23.7571	23.3783	23.6392	24.0772	23.1892	13	3	23.5471	0.341655	0.0145094	Q9NX76	CMTM6	697	CKLF-like MARVEL transmembrane domain-containing protein 6 [OS=Homo sapiens]
23.6926	23.1309	23.8913	23.3117	23.7974	23.1426	25	6	23.4944	0.339956	0.0144697	P48739	PITPNB	698	Phosphatidylinositol transfer protein beta isoform [OS=Homo sapiens]
19.2244	19.1027	19.174	19.3419	18.5489	19.0743	0	1	19.0777	0.276	0.0144671	Q13315	ATM	699	Serine-protein kinase ATM [OS=Homo sapiens]
24.4903	25.0381	24.6304	25.3785	25.3339	24.9964	28	4	24.9779	0.360486	0.0144322	P55056	APOC4	700	Apolipoprotein C-IV [OS=Homo sapiens]
25.3872	24.8077	25.263	24.8321	24.7434	25.6121	39	5	25.1076	0.362019	0.0144187	O43665	RGS10	701	Isoform 3 of Regulator of G-protein signaling 10 [OS=Homo sapiens]
20.0757	19.911	20.3576	20.4421	19.9653	19.6693	6	1	20.0702	0.289122	0.0144056	P61923	COPZ1	702	Coatomer subunit zeta-1 [OS=Homo sapiens]
24.9529	24.3727	25.1125	24.4209	24.4903	24.2219	18	7	24.5952	0.353794	0.0143847	P50570	DNM2	703	Isoform 4 of Dynamin-2 [OS=Homo sapiens]
23.0603	23.2326	23.1254	23.8349	23.5278	23.7796	11	3	23.4268	0.335877	0.0143373	Q04323	UBXN1	704	Isoform 2 of UBX domain-containing protein 1 [OS=Homo sapiens]
20.4611	21.1205	21.0458	20.7658	21.2254	20.6534	8	3	20.8787	0.298169	0.014281	Q99816	TSG101	705	tumor susceptibility gene 101 protein [OS=Homo sapiens]
22.7596	22.677	22.1604	22.6499	22.4863	21.9591	7	6	22.4487	0.320441	0.0142744	Q05397	PTK2	706	Focal adhesion kinase 1 [OS=Homo sapiens]
22.8377	22.9022	22.4926	22.571	22.6971	22.0075	20	5	22.5847	0.322267	0.0142693	Q7Z4W1	DCXR	707	L-xylulose reductase [OS=Homo sapiens]
20.8391	20.5022	20.7275	20.3839	20.4836	20.0037	9	7	20.49	0.291942	0.014248	Q03518	TAP1	708	Antigen peptide transporter 1 [OS=Homo sapiens]
17.6486	18.1795	17.7528	17.4661	17.5442	17.6562	8	3	17.7079	0.251371	0.0141954	P10645	CHGA	709	Chromogranin-A [OS=Homo sapiens]
21.1799	20.8799	20.9895	20.8452	20.8582	21.6141	4	1	21.0612	0.298563	0.014176	O15260	SURF4	710	surfeit locus protein 4 [OS=Homo sapiens]
20.3304	20.2885	20.2314	20.8772	20.7524	20.2108	7	2	20.4485	0.289586	0.0141617	Q8NG11	TSPAN14	711	Tetraspanin-14 [OS=Homo sapiens]
22.3548	22.0521	21.5701	21.9427	22.0993	22.4414	26	6	22.0767	0.311799	0.0141234	O75935	DCTN3	712	Dynactin subunit 3 [OS=Homo sapiens]
19.5916	20.1564	20.0261	20.4056	20.0386	19.7994	20	6	20.003	0.282166	0.0141062	Q8N4L2	PIP4P2	713	Type 2 phosphatidylinositol 4,5-bisphosphate 4-phosphatase [OS=Homo sapiens]
17.9349	18.2612	17.9582	17.7323	17.8595	17.5044	4	1	17.8751	0.252034	0.0140998	Q8WUY1	THEM6	714	Protein THEM6 [OS=Homo sapiens]
19.6384	19.5258	20.1699	19.6501	19.9817	20.1365	2	1	19.8504	0.279867	0.0140988	Q14587	ZNF268	715	Zinc finger protein 268 [OS=Homo sapiens]
22.0172	21.3053	21.2202	21.7285	21.8056	21.6633	20	6	21.6233	0.304853	0.0140984	Q92820	GGH	716	Gamma-glutamyl hydrolase [OS=Homo sapiens]
18.3855	18.5652	18.3245	19.0131	18.7807	18.4691	5	1	18.5897	0.261904	0.0140887	Q9Y6M9	NDUFB9	717	NADH dehydrogenase [ubiquinone] 1 beta subcomplex subunit 9 [OS=Homo sapiens]
20.2343	20.7076	19.8997	20.4674	20.2927	20.0751	9	5	20.2795	0.285243	0.0140656	P31751	AKT2	718	RAC-beta serine/threonine-protein kinase [OS=Homo sapiens]
21.6502	21.7113	21.2518	21.3305	20.9147	21.5772	21	3	21.406	0.301013	0.0140621	P62330	ARF6	719	ADP-ribosylation factor 6 [OS=Homo sapiens]
20.5791	20.6772	20.1982	20.6531	19.9548	20.4029	12	5	20.4109	0.286775	0.0140501	Q13409	DYNC1I2	720	cytoplasmic dynein 1 intermediate chain 2 [OS=Homo sapiens]
24.3249	24.0765	24.6909	24.0789	23.736	24.4795	29	15	24.2311	0.338843	0.0139838	Q7Z794	KRT77	721	Keratin, type II cytoskeletal 1b [OS=Homo sapiens]
22.423	22.5381	21.7051	22.5438	22.3125	22.2957	7	2	22.3031	0.311553	0.0139691	P27701	CD82	722	CD82 antigen [OS=Homo sapiens]
21.5474	21.3294	21.6739	21.7247	21.605	20.9243	18	8	21.4674	0.299382	0.0139459	P35241	RDX	723	radixin [OS=Homo sapiens]
25.8096	25.7664	25.0158	25.0441	25.1713	25.2992	21	11	25.3511	0.353374	0.0139392	P05155	SERPING1	724	Plasma protease C1 inhibitor [OS=Homo sapiens]
22.6759	23.1315	22.5759	22.8963	23.4577	23.0054	33	6	22.9571	0.319808	0.0139307	Q9NP72	RAB18	725	Ras-related protein Rab-18 [OS=Homo sapiens]
22.4851	22.5662	22.6488	22.6551	22.4976	23.3234	19	4	22.696	0.315666	0.0139084	P51809	VAMP7	726	vesicle-associated membrane protein 7 [OS=Homo sapiens]
21.7507	22.0508	21.5874	21.914	21.9037	22.4748	47	4	21.9469	0.303378	0.0138233	P99999	CYCS	727	cytochrome c [OS=Homo sapiens]
21.3877	21.7291	22.0178	22.0918	21.9657	21.453	18	4	21.7742	0.300483	0.0138	Q5VWZ2	LYPLAL1	728	Lysophospholipase-like protein 1 [OS=Homo sapiens]
20.7626	20.8439	20.541	20.1605	20.9643	20.5867	10	8	20.6432	0.284355	0.0137748	P21399	ACO1	729	Cytoplasmic aconitate hydratase [OS=Homo sapiens]
18.7166	18.4661	18.5325	18.5031	17.9587	18.4106	5	3	18.4313	0.253694	0.0137643	O95630	STAMBP	730	STAM-binding protein [OS=Homo sapiens]
22.7412	23.0899	23.0252	23.062	22.6696	22.2824	17	7	22.8117	0.313344	0.0137361	P15529	CD46	731	Isoform L of Membrane cofactor protein [OS=Homo sapiens]
23.2684	22.9241	23.5421	22.9892	22.6324	23.2304	25	9	23.0978	0.317072	0.0137274	Q9NV96	TMEM30A	732	Cell cycle control protein 50A [OS=Homo sapiens]
22.7644	22.8151	22.6656	23.0439	22.6531	22.1121	18	2	22.6757	0.310209	0.0136802	A0A075B6H9	IGLV4-69	733	immunoglobulin lambda variable 4-69 [OS=Homo sapiens]
20.0999	20.0282	19.874	20.5592	20.5125	20.3277	18	5	20.2336	0.276427	0.0136618	Q9H7J1	PPP1R3E	734	Protein phosphatase 1 regulatory subunit 3E [OS=Homo sapiens]
21.5609	21.1841	21.3335	21.3497	20.7847	21.5653	37	3	21.2963	0.290156	0.0136247	Q9H4X1	RGCC	735	regulator of cell cycle RGCC [OS=Homo sapiens]
20.8995	20.8459	20.8753	21.075	20.2612	20.9374	5	4	20.8157	0.283183	0.0136043	O75154	RAB11FIP3	736	Isoform 3 of Rab11 family-interacting protein 3 [OS=Homo sapiens]
21.4034	21.6513	22.0049	21.4637	21.2292	21.2476	7	6	21.5	0.29173	0.0135688	O14964	HGS	737	Hepatocyte growth factor-regulated tyrosine kinase substrate [OS=Homo sapiens]
20.7509	20.8819	20.1792	20.6407	20.9245	20.871	20	3	20.7081	0.279166	0.013481	Q9BX68	HINT2	738	Histidine triad nucleotide-binding protein 2, mitochondrial [OS=Homo sapiens]
19.9478	20.0985	19.6217	20.243	20.4048	19.9752	2	1	20.0485	0.270163	0.0134755	P34913	EPHX2	739	Bifunctional epoxide hydrolase 2 [OS=Homo sapiens]
19.2461	19.2926	19.0626	19.5895	19.6428	19.7187	7	1	19.4254	0.261394	0.0134563	Q9BRA2	TXNDC17	740	Thioredoxin domain-containing protein 17 [OS=Homo sapiens]
20.8702	21.4359	21.0441	21.0591	21.1995	20.6055	8	4	21.0357	0.282864	0.0134468	Q8N1G4	LRRC47	741	Leucine-rich repeat-containing protein 47 [OS=Homo sapiens]
22.0025	22.7776	22.7723	22.7607	22.7129	22.673	20	9	22.6165	0.303486	0.0134188	P50995	ANXA11	742	annexin A11 [OS=Homo sapiens]
20.994	20.3494	20.8734	20.5077	20.318	20.6318	6	4	20.6124	0.27602	0.013391	Q8WWI5	SLC44A1	743	Isoform 3 of Choline transporter-like protein 1 [OS=Homo sapiens]
21.4176	20.8361	21.3799	21.2592	21.5057	20.8951	25	1	21.2156	0.283039	0.0133411	P01780	IGHV3-7	744	Immunoglobulin heavy variable 3-7 [OS=Homo sapiens]
23.1146	22.6892	22.8491	22.7562	22.7518	23.4847	4	3	22.9409	0.305809	0.0133303	Q9Y4K3	TRAF6	745	TNF receptor-associated factor 6 [OS=Homo sapiens]
22.8747	23.2027	23.1389	23.3884	23.5772	22.754	22	4	23.156	0.30809	0.013305	P19652	ORM2	746	Alpha-1-acid glycoprotein 2 [OS=Homo sapiens]
24.4313	23.8964	23.6222	23.8773	23.8917	24.3819	10	10	24.0168	0.31952	0.013304	Q4KMQ2	ANO6	747	Isoform 3 of Anoctamin-6 [OS=Homo sapiens]
23.8544	24.3617	23.4781	24.1465	24.2275	24.1376	40	7	24.0343	0.319212	0.0132815	P18669	PGAM1	748	Phosphoglycerate mutase 1 [OS=Homo sapiens]
22.3084	21.5726	22.161	22.0345	22.0471	22.4128	12	2	22.0894	0.293097	0.0132687	P49720	PSMB3	749	proteasome subunit beta type-3 [OS=Homo sapiens]
20.5984	21.3257	20.7619	20.9587	20.6956	20.6225	17	2	20.8271	0.276262	0.0132645	P03973	SLPI	750	Antileukoproteinase [OS=Homo sapiens]
24.6743	23.9844	24.7341	24.6967	24.9201	24.7521	19	14	24.6269	0.326533	0.0132592	P10643	C7	751	Complement component C7 [OS=Homo sapiens]
19.5783	19.2466	19.819	19.0832	19.4992	19.4141	3	1	19.4401	0.25755	0.0132484	Q12982	BNIP2	752	Isoform 2 of BCL2/adenovirus E1B 19 kDa protein-interacting protein 2 [OS=Homo sapiens]
23.7571	24.3092	24.1799	24.0198	24.1691	23.4616	25	8	23.9828	0.317505	0.0132389	P31323	PRKAR2B	753	cAMP-dependent protein kinase type II-beta regulatory subunit [OS=Homo sapiens]
18.3185	18.8614	18.767	18.3713	18.5865	18.8846	8	3	18.6315	0.246153	0.0132116	O60684	KPNA6	754	Importin subunit alpha-7 [OS=Homo sapiens]
19.8673	19.3855	20.1013	19.4864	19.6737	19.7593	14	3	19.7123	0.25955	0.0131669	P57729	RAB38	755	ras-related protein Rab-38 [OS=Homo sapiens]
21.1158	21.2547	21.2937	20.8006	21.549	20.8785	13	8	21.1487	0.278458	0.0131667	Q8WVM8	SCFD1	756	Sec1 family domain-containing protein 1 [OS=Homo sapiens]
20.684	20.8927	20.2298	20.7809	20.8967	20.416	0	1	20.65	0.271811	0.0131627	Q16787	LAMA3	757	Isoform 1 of Laminin subunit alpha-3 [OS=Homo sapiens]
23.148	22.4679	23.0376	23.0532	22.9528	23.3838	12	5	23.0072	0.302818	0.0131619	P49821	NDUFV1	758	Isoform 2 of NADH dehydrogenase [ubiquinone] flavoprotein 1, mitochondrial [OS=Homo sapiens]
20.8632	20.7977	20.7292	20.687	20.9716	20.192	21	10	20.7068	0.271586	0.0131158	P31939	ATIC	759	bifunctional purine biosynthesis protein purH [OS=Homo sapiens]
27.5436	27.5295	27.641	28.3759	27.3228	27.6219	4	7	27.6725	0.362682	0.0131062	O75533	SF3B1	760	splicing factor 3B subunit 1 [OS=Homo sapiens]
21.7526	22.3707	21.6472	21.7166	22.0304	21.6539	4	2	21.8619	0.286243	0.0130932	Q9C037	TRIM4	761	E3 ubiquitin-protein ligase TRIM4 [OS=Homo sapiens]
21.0603	21.1504	21.2021	21.2016	20.6392	21.4849	17	2	21.1231	0.276473	0.0130887	P61970	NUTF2	762	nuclear transport factor 2 [OS=Homo sapiens]
21.8099	22.2683	21.67	22.3274	22.3256	21.933	13	7	22.0557	0.288465	0.0130789	Q02252	ALDH6A1	763	Methylmalonate-semialdehyde dehydrogenase [acylating], mitochondrial [OS=Homo sapiens]
29.2915	28.2345	28.9663	28.9775	28.667	29.1335	62	26	28.8784	0.377531	0.0130731	P35527	KRT9	764	Keratin, type I cytoskeletal 9 [OS=Homo sapiens]
24.3703	23.3945	23.9253	23.8999	23.8464	23.8007	10	5	23.8729	0.311671	0.0130555	P23381	WARS1	765	Tryptophan--tRNA ligase, cytoplasmic [OS=Homo sapiens]
18.7611	18.9777	18.3724	18.5537	18.9866	18.8493	6	1	18.7501	0.244501	0.0130399	P52815	MRPL12	766	39S ribosomal protein L12, mitochondrial [OS=Homo sapiens]
18.6029	18.7446	19.1241	18.9376	18.5377	18.5112	4	2	18.743	0.244373	0.0130381	Q2M3D2	EXOC3L2	767	Exocyst complex component 3-like protein 2 [OS=Homo sapiens]
21.3175	21.1488	21.3192	21.1004	21.8461	21.5509	14	8	21.3805	0.27773	0.0129899	O75410	TACC1	768	Transforming acidic coiled-coil-containing protein 1 [OS=Homo sapiens]
22.444	22.8682	23.0013	23.0996	23.094	22.4878	38	5	22.8325	0.2964	0.0129815	Q13404	UBE2V1	769	Isoform 1 of Ubiquitin-conjugating enzyme E2 variant 1 [OS=Homo sapiens]
20.4177	20.7487	20.7808	21.0701	21.0314	21.1389	6	1	20.8646	0.27034	0.0129569	O43561	LAT	770	Linker for activation of T-cells family member 1 [OS=Homo sapiens]
24.1531	23.8491	24.0946	24.3401	24.2533	24.7885	35	17	24.2464	0.313808	0.0129424	Q99832	CCT7	771	T-complex protein 1 subunit eta [OS=Homo sapiens]
27.4805	28.1531	27.6393	28.4141	28.1643	28.1771	4	1	28.0047	0.361403	0.0129051	Q9H0W7	THAP2	772	THAP domain-containing protein 2 [OS=Homo sapiens]
18.605	18.8079	18.6797	19.0359	19.0792	18.4688	3	1	18.7794	0.242191	0.0128967	P0C7M8	CLEC2L	773	C-type lectin domain family 2 member L [OS=Homo sapiens]
19.9338	20.5243	20.1138	20.4042	20.5757	20.5255	0	1	20.3462	0.262277	0.0128907	Q6ZTR5	CFAP47	774	Cilia- and flagella-associated protein 47 [OS=Homo sapiens]
23.6409	24.2031	23.9373	24.1327	24.0652	23.4193	16	15	23.8997	0.307563	0.0128689	Q9NZ08	ERAP1	775	endoplasmic reticulum aminopeptidase 1 [OS=Homo sapiens]
25.8572	25.1071	25.3821	25.6224	24.9921	25.5562	17	16	25.4195	0.326525	0.0128454	Q86YZ3	HRNR	776	Hornerin [OS=Homo sapiens]
18.2057	18.4603	18.6509	18.768	18.6764	18.8701	2	1	18.6052	0.238519	0.01282	P11182	DBT	777	Lipoamide acyltransferase component of branched-chain alpha-keto acid dehydrogenase complex, mitochondrial [OS=Homo sapiens]
19.3996	18.8587	19.0832	18.7899	18.7862	18.8281	12	4	18.9576	0.242972	0.0128166	P11217	PYGM	778	Isoform 2 of Glycogen phosphorylase, muscle form [OS=Homo sapiens]
21.5813	22.0358	21.9853	21.8657	21.5213	21.3515	25	2	21.7235	0.277774	0.0127868	Q9UJC5	SH3BGRL2	779	SH3 domain-binding glutamic acid-rich-like protein 2 [OS=Homo sapiens]
21.3985	21.8075	21.9722	21.9139	22.101	22.1924	25	5	21.8976	0.279762	0.0127759	Q9UL46	PSME2	780	proteasome activator complex subunit 2 [OS=Homo sapiens]
22.387	21.6759	21.9998	22.0362	22.0489	22.444	26	3	22.0986	0.281888	0.0127559	P25398	RPS12	781	40S ribosomal protein S12 [OS=Homo sapiens]
23.509	23.2253	22.9418	23.5022	22.7858	23.3021	27	12	23.211	0.295088	0.0127132	P19013	KRT4	782	Keratin, type II cytoskeletal 4 [OS=Homo sapiens]
23.2071	23.4315	23.522	22.8799	22.816	22.9844	20	3	23.1402	0.294016	0.0127059	Q9NUQ9	CYRIB	783	Isoform 2 of Protein FAM49B [OS=Homo sapiens]
18.7889	18.1808	18.4418	18.242	18.2708	18.1945	11	2	18.3531	0.233122	0.012702	P19404	NDUFV2	784	NADH dehydrogenase [ubiquinone] flavoprotein 2, mitochondrial [OS=Homo sapiens]
20.2365	20.64	19.9104	20.0996	20.018	20.2416	8	7	20.191	0.254278	0.0125936	P49619	DGKG	785	Isoform 2 of Diacylglycerol kinase gamma [OS=Homo sapiens]
23.131	23.3005	23.1727	22.7308	23.1358	23.6311	22	5	23.1837	0.291247	0.0125626	Q6UWP8	SBSN	786	Suprabasin [OS=Homo sapiens]
16.4778	17.0315	16.8594	16.7823	16.9731	16.6226	3	1	16.7911	0.2108	0.0125543	Q8N9M5	TMEM102	787	transmembrane protein 102 [OS=Homo sapiens]
20.1614	19.9367	19.8943	19.8539	19.995	20.5261	13	4	20.0612	0.251744	0.0125488	Q92734	TFG	788	Protein TFG [OS=Homo sapiens]
20.3702	21.1644	20.7202	20.7557	20.7601	20.9184	6	5	20.7815	0.260557	0.0125379	P98082	DAB2	789	Disabled homolog 2 [OS=Homo sapiens]
21.2622	21.4382	21.5671	21.2528	21.5307	21.9862	9	4	21.5062	0.269501	0.0125313	Q9NVG8	TBC1D13	790	TBC1 domain family member 13 [OS=Homo sapiens]
22.154	21.6349	21.3355	21.5913	21.5487	21.6838	20	7	21.658	0.271143	0.0125193	P08758	ANXA5	791	annexin A5 [OS=Homo sapiens]
22.0086	21.8875	21.8717	22.0732	21.7936	22.5534	17	6	22.0313	0.274763	0.0124715	Q08257	CRYZ	792	Quinone oxidoreductase [OS=Homo sapiens]
21.9791	22.2184	22.5266	21.9053	21.8044	22.3158	27	9	22.1249	0.275218	0.0124393	Q16539	MAPK14	793	Mitogen-activated protein kinase 14 [OS=Homo sapiens]
19.4555	19.8985	19.6135	19.6531	19.8375	19.2434	3	5	19.6169	0.24285	0.0123796	Q14152	EIF3A	794	Eukaryotic translation initiation factor 3 subunit A [OS=Homo sapiens]
22.4926	22.9799	23.0428	22.8241	23.2664	22.6357	13	14	22.8736	0.282281	0.0123409	Q9H2G2	SLK	795	Isoform 2 of STE20-like serine/threonine-protein kinase [OS=Homo sapiens]
22.2151	22.5241	22.2273	22.465	22.9732	22.4057	21	11	22.4684	0.277189	0.0123369	P49591	SARS1	796	Serine--tRNA ligase, cytoplasmic [OS=Homo sapiens]
26.6361	27.4081	27.2708	27.5114	27.4486	27.0021	35	1	27.2129	0.33565	0.0123343	P02776	PF4	797	Platelet factor 4 [OS=Homo sapiens]
23.9855	24.6656	24.0966	24.5161	24.6051	24.0992	21	8	24.328	0.299804	0.0123234	P22694	PRKACB	798	Isoform 2 of cAMP-dependent protein kinase catalytic subunit beta [OS=Homo sapiens]
20.5715	20.1123	20.5111	19.9835	20.0373	20.3043	10	2	20.2533	0.248858	0.0122872	P61009	SPCS3	799	Signal peptidase complex subunit 3 [OS=Homo sapiens]
21.5779	21.875	21.4589	21.9572	22.2037	21.8362	13	7	21.8182	0.267717	0.0122704	O15523	DDX3Y	800	atp-dependent rna helicase ddx3y [OS=Homo sapiens]
24.0728	23.7542	23.7688	23.5078	23.5257	24.2343	55	2	23.8106	0.291921	0.0122601	P07951	TPM2	801	Isoform 2 of Tropomyosin beta chain [OS=Homo sapiens]
21.9077	21.8731	22.0848	21.3807	21.4986	21.7947	18	4	21.7566	0.26586	0.0122197	Q99685	MGLL	802	monoglyceride lipase [OS=Homo sapiens]
25.8352	26.3626	26.1639	26.4006	26.5723	25.7842	42	6	26.1864	0.319817	0.0122131	P35542	SAA4	803	Serum amyloid A-4 protein [OS=Homo sapiens]
21.5358	21.5672	22.181	21.7222	21.7224	21.4277	15	2	21.6927	0.264863	0.0122098	O75380	NDUFS6	804	NADH dehydrogenase [ubiquinone] iron-sulfur protein 6, mitochondrial [OS=Homo sapiens]
19.5848	19.3172	19.5244	19.6503	19.8202	20.0068	6	4	19.6506	0.239594	0.0121927	Q13496	MTM1	805	Myotubularin [OS=Homo sapiens]
21.6238	22.2746	21.9487	21.5954	21.7206	21.6411	66	6	21.8007	0.265276	0.0121682	Q15369	ELOC	806	elongin-C [OS=Homo sapiens]
22.0399	21.5597	21.6999	21.9779	22.1602	22.2442	21	8	21.947	0.266233	0.0121308	P51575	P2RX1	807	P2X purinoceptor 1 [OS=Homo sapiens]
19.8875	19.7539	19.887	19.5147	19.3798	19.3854	9	3	19.6347	0.238054	0.0121241	O95865	DDAH2	808	N(G),N(G)-dimethylarginine dimethylaminohydrolase 2 [OS=Homo sapiens]
20.9467	20.4354	21.126	21.0312	21.0894	20.9855	13	3	20.9357	0.2537	0.0121181	Q12974	PTP4A2	809	Protein tyrosine phosphatase type IVA 2 [OS=Homo sapiens]
19.919	19.9404	20.0522	20.3517	19.9933	20.5068	22	4	20.1273	0.243442	0.0120951	Q9BY43	CHMP4A	810	Charged multivesicular body protein 4a [OS=Homo sapiens]
23.5401	24.1045	23.6595	24.1221	23.6364	24.1687	24	11	23.8719	0.288285	0.0120763	P29401	TKT	811	Transketolase [OS=Homo sapiens]
23.4918	23.3707	23.4774	23.6544	24.0151	24.0271	4	4	23.6727	0.284704	0.0120267	P12830	CDH1	812	Cadherin-1 [OS=Homo sapiens]
21.8507	21.7463	21.7049	22.128	22.3044	21.6417	15	2	21.896	0.263151	0.0120182	Q9H910	JPT2	813	Jupiter microtubule associated homolog 2 [OS=Homo sapiens]
22.4462	22.6663	22.7133	23.0568	23.1619	22.6299	1	1	22.7791	0.273398	0.0120022	Q8NFP4	MDGA1	814	MAM domain-containing glycosylphosphatidylinositol anchor protein 1 [OS=Homo sapiens]
18.4965	19.1747	18.8326	18.729	18.7959	18.6744	6	1	18.7838	0.22487	0.0119714	P16298	PPP3CB	815	serine/threonine-protein phosphatase 2B catalytic subunit beta isoform [OS=Homo sapiens]
18.5857	18.2163	18.1673	18.0489	18.2543	17.9528	3	1	18.2042	0.217645	0.0119558	P07476	IVL	816	Involucrin [OS=Homo sapiens]
23.3666	23.9337	23.5628	23.4738	23.8873	24.0627	11	15	23.7145	0.283259	0.0119446	Q9Y5S2	CDC42BPB	817	Serine/threonine-protein kinase MRCK beta [OS=Homo sapiens]
22.3924	21.8272	22.1921	22.1886	22.4637	22.5735	12	15	22.2729	0.265823	0.0119348	Q9ULH1	ASAP1	818	Isoform 1 of Arf-GAP with SH3 domain, ANK repeat and PH domain-containing protein 1 [OS=Homo sapiens]
27.036	26.2276	26.8363	26.5143	26.2851	26.7134	49	11	26.6021	0.317474	0.0119341	Q9Y277	VDAC3	819	Voltage-dependent anion-selective channel protein 3 [OS=Homo sapiens]
23.1813	22.5791	23.1071	22.9762	22.6266	23.1824	22	9	22.9421	0.273727	0.0119312	O95299	NDUFA10	820	NADH dehydrogenase [ubiquinone] 1 alpha subcomplex subunit 10, mitochondrial [OS=Homo sapiens]
21.0304	20.3156	20.7426	20.574	20.5506	20.8076	11	3	20.6702	0.246237	0.0119127	Q9H6Q3	SLA2	821	Src-like-adapter 2 [OS=Homo sapiens]
18.3148	18.4207	18.6728	18.3661	18.6122	18.0676	4	2	18.409	0.218285	0.0118575	P51116	FXR2	822	Fragile X mental retardation syndrome-related protein 2 [OS=Homo sapiens]
22.4881	22.8932	22.0747	22.5836	22.544	22.3951	25	6	22.4964	0.266649	0.0118529	P06241	FYN	823	Isoform 3 of Tyrosine-protein kinase Fyn [OS=Homo sapiens]
21.5451	21.5771	21.7242	21.2885	21.1726	21.8446	21	7	21.5254	0.254992	0.0118461	Q16543	CDC37	824	Hsp90 co-chaperone Cdc37 [OS=Homo sapiens]
22.4555	22.7928	22.6252	23.0715	23.1606	22.6951	20	3	22.8001	0.26984	0.011835	P59666	DEFA3	825	Neutrophil defensin 3 [OS=Homo sapiens]
19.214	19.688	19.311	19.4462	19.1779	19.0414	1	1	19.3131	0.22812	0.0118117	O00471	EXOC5	826	Exocyst complex component 5 [OS=Homo sapiens]
19.1195	18.7203	18.5321	19.0547	18.7851	18.9608	2	1	18.8621	0.222718	0.0118077	Q13557	CAMK2D	827	Calcium/calmodulin-dependent protein kinase type II subunit delta [OS=Homo sapiens]
22.5404	22.679	22.9398	22.5264	22.2145	22.2814	5	1	22.5303	0.265178	0.0117699	Q969X1	TMBIM1	828	Protein lifeguard 3 [OS=Homo sapiens]
25.2753	25.3854	25.6023	25.8742	26.0392	25.4147	30	20	25.5985	0.30128	0.0117695	Q96C24	SYTL4	829	Synaptotagmin-like protein 4 [OS=Homo sapiens]
20.355	20.885	20.4676	20.7005	20.3153	20.2853	14	3	20.5015	0.241114	0.0117608	P11908	PRPS2	830	ribose-phosphate pyrophosphokinase 2 [OS=Homo sapiens]
21.3173	21.5699	21.5604	21.7085	21.4739	20.9954	10	7	21.4376	0.251933	0.011752	P18084	ITGB5	831	Integrin beta-5 [OS=Homo sapiens]
19.8009	20.0265	19.4458	20.0128	19.7948	19.5741	12	2	19.7758	0.232214	0.0117423	Q9H9B4	SFXN1	832	Sideroflexin-1 [OS=Homo sapiens]
23.207	23.7393	23.5606	23.9042	23.9586	23.8089	8	2	23.6964	0.277268	0.0117008	O15127	SCAMP2	833	Secretory carrier-associated membrane protein 2 [OS=Homo sapiens]
19.1256	19.5793	19.3725	19.139	18.9347	19.2793	3	1	19.2384	0.223907	0.0116386	Q9Y3B8	REXO2	834	Oligoribonuclease, mitochondrial [OS=Homo sapiens]
19.2052	19.4345	19.2283	18.757	19.088	19.1435	21	2	19.1428	0.22277	0.0116373	O75531	BANF1	835	Barrier-to-autointegration factor [OS=Homo sapiens]
27.7721	27.0795	27.1367	27.2338	27.1525	27.7428	30	24	27.3529	0.317368	0.0116027	P05556	ITGB1	836	Integrin beta-1 [OS=Homo sapiens]
20.4609	20.6802	20.7041	20.734	20.7678	20.1489	9	4	20.5827	0.238518	0.0115883	Q12912	IRAG2	837	Lymphoid-restricted membrane protein [OS=Homo sapiens]
21.3251	21.7623	21.7433	21.2344	21.2114	21.5439	11	5	21.4701	0.248611	0.0115794	Q15208	STK38	838	serine/threonine-protein kinase 38 [OS=Homo sapiens]
21.2524	21.1583	21.694	21.7165	21.5377	21.2327	17	5	21.4319	0.248054	0.011574	Q969X5	ERGIC1	839	Endoplasmic reticulum-Golgi intermediate compartment protein 1 [OS=Homo sapiens]
19.897	20.2514	19.7042	20.1225	20.1233	19.7154	7	6	19.9689	0.230963	0.0115661	Q96MK2	RIPOR3	840	RIPOR family member 3 [OS=Homo sapiens]
23.2778	23.4656	23.3394	23.9515	23.7469	23.3265	23	6	23.5179	0.271759	0.0115554	P54709	ATP1B3	841	sodium/potassium-transporting ATPase subunit beta-3 [OS=Homo sapiens]
25.8459	25.1997	25.8121	25.341	25.8734	25.8121	24	4	25.6474	0.296331	0.0115541	O75947	ATP5PD	842	ATP synthase subunit d, mitochondrial [OS=Homo sapiens]
24.4474	25.0494	24.6324	24.9565	24.4441	24.4004	16	31	24.655	0.282629	0.0114634	Q14008	CKAP5	843	Cytoskeleton-associated protein 5 [OS=Homo sapiens]
21.7192	21.1397	21.5535	21.1119	21.2666	21.487	32	12	21.3797	0.244569	0.0114394	Q12805	EFEMP1	844	EGF-containing fibulin-like extracellular matrix protein 1 [OS=Homo sapiens]
23.9827	23.2973	23.7622	23.3705	23.813	23.7668	35	11	23.6654	0.270018	0.0114098	Q9H4M9	EHD1	845	EH domain-containing protein 1 [OS=Homo sapiens]
20.5954	20.1578	20.7098	20.4567	20.375	20.7929	11	2	20.5146	0.233329	0.0113738	Q96IU4	ABHD14B	846	Protein ABHD14B [OS=Homo sapiens]
20.3839	20.4391	20.3744	20.406	20.6014	20.9745	3	2	20.5299	0.233222	0.0113601	Q13443	ADAM9	847	disintegrin and metalloproteinase domain-containing protein 9 [OS=Homo sapiens]
20.2356	20.9437	20.4724	20.5215	20.6153	20.4627	12	1	20.5419	0.233317	0.0113581	P14406	COX7A2	848	Cytochrome c oxidase subunit 7A2, mitochondrial [OS=Homo sapiens]
19.5916	19.405	19.9243	19.4348	19.2856	19.4882	10	2	19.5216	0.221377	0.0113401	Q15166	PON3	849	Serum paraoxonase/lactonase 3 [OS=Homo sapiens]
24.1913	24.5692	24.3574	24.5334	24.5648	23.873	28	5	24.3482	0.275883	0.0113307	P00441	SOD1	850	Superoxide dismutase [Cu-Zn] [OS=Homo sapiens]
22.6176	23.2201	22.7288	22.5204	23.0011	22.7709	12	10	22.8098	0.258356	0.0113265	P41226	UBA7	851	ubiquitin-like modifier-activating enzyme 7 [OS=Homo sapiens]
25.7543	25.5484	25.0698	25.1242	25.4932	25.1092	17	2	25.3499	0.286635	0.0113072	P06312	IGKV4-1	852	immunoglobulin kappa variable 4-1 [OS=Homo sapiens]
23.1605	22.9001	22.6128	22.8276	23.1131	23.3308	11	9	22.9908	0.259658	0.011294	Q5T447	HECTD3	853	E3 ubiquitin-protein ligase HECTD3 [OS=Homo sapiens]
18.8664	18.4198	18.7375	18.6674	18.4079	18.8885	10	4	18.6646	0.210722	0.0112899	Q9Y3I0	RTCB	854	tRNA-splicing ligase RtcB homolog [OS=Homo sapiens]
22.6096	23.0596	22.7913	22.7218	22.4337	22.3564	11	12	22.6621	0.255582	0.011278	P55160	NCKAP1L	855	Nck-associated protein 1-like [OS=Homo sapiens]
22.2572	21.8821	21.9931	22.2117	22.5577	22.4005	37	6	22.217	0.250455	0.0112731	Q15366	PCBP2	856	Isoform 3 of Poly(rC)-binding protein 2 [OS=Homo sapiens]
20.8451	20.4029	20.8624	20.7836	20.8548	21.1298	8	4	20.8131	0.234385	0.0112614	Q6NUK1	SLC25A24	857	Calcium-binding mitochondrial carrier protein SCaMC-1 [OS=Homo sapiens]
20.1466	20.6528	20.5313	20.181	20.3705	20.0865	1	1	20.3281	0.228656	0.0112483	O95359	TACC2	858	Transforming acidic coiled-coil-containing protein 2 [OS=Homo sapiens]
23.538	23.9299	23.3697	23.8637	23.9078	23.3792	14	12	23.6647	0.265938	0.0112377	Q9Y2X7	GIT1	859	ARF GTPase-activating protein GIT1 [OS=Homo sapiens]
23.4694	23.064	23.1707	23.0808	22.9225	23.596	19	6	23.2172	0.260072	0.0112017	P35914	HMGCL	860	Hydroxymethylglutaryl-CoA lyase, mitochondrial [OS=Homo sapiens]
21.6771	21.5128	21.8943	22.0847	22.1655	21.9041	4	2	21.8731	0.244894	0.0111961	P30038	ALDH4A1	861	Delta-1-pyrroline-5-carboxylate dehydrogenase, mitochondrial [OS=Homo sapiens]
23.5115	23.068	23.1292	23.3291	23.7832	23.3419	18	20	23.3605	0.261488	0.0111936	Q86VP6	CAND1	862	cullin-associated nedd8-dissociated protein 1 [OS=Homo sapiens]
24.8349	24.2416	24.1895	24.2684	24.2218	24.6544	12	35	24.4018	0.272861	0.011182	P15924	DSP	863	Desmoplakin [OS=Homo sapiens]
18.9448	18.7506	19.2844	19.0769	18.7194	19.0254	9	2	18.9669	0.212076	0.0111814	P04085	PDGFA	864	Platelet-derived growth factor subunit A [OS=Homo sapiens]
22.6967	22.9853	23.0763	23.3548	23.4012	23.0667	14	12	23.0969	0.2581	0.0111747	Q13200	PSMD2	865	26S proteasome non-ATPase regulatory subunit 2 [OS=Homo sapiens]
21.2298	20.9165	21.1945	21.2636	21.4267	21.6243	18	4	21.2759	0.237551	0.0111652	Q00688	FKBP3	866	peptidyl-prolyl cis-trans isomerase FKBP3 [OS=Homo sapiens]
18.728	18.8452	18.6944	19.0393	18.4086	18.8289	11	1	18.7574	0.209182	0.011152	O75688	PPM1B	867	Protein phosphatase 1B [OS=Homo sapiens]
22.7847	22.9903	22.9213	23	23.5281	22.9761	10	6	23.0334	0.25512	0.0110761	P11279	LAMP1	868	Lysosome-associated membrane glycoprotein 1 [OS=Homo sapiens]
22.4573	22.5866	22.6671	23.0422	22.3087	22.7144	23	8	22.6294	0.250334	0.0110624	Q86WR7	PROSER2	869	Proline and serine-rich protein 2 [OS=Homo sapiens]
25.1332	24.9489	25.2326	24.9332	24.5033	24.6684	17	6	24.9033	0.275485	0.0110622	P54727	RAD23B	870	UV excision repair protein RAD23 homolog B [OS=Homo sapiens]
20.0645	20.1162	20.2164	19.9207	19.6623	19.7325	6	1	19.9521	0.220247	0.0110388	O00501	CLDN5	871	Claudin-5 [OS=Homo sapiens]
18.6594	18.9543	18.7869	18.8829	18.5734	18.3994	4	1	18.7094	0.206499	0.0110372	Q8IZ81	ELMOD2	872	ELMO domain-containing protein 2 [OS=Homo sapiens]
19.2786	19.1488	18.9795	19.5406	19.5064	19.3001	16	2	19.2923	0.212692	0.0110247	Q14240	EIF4A2	873	Isoform 2 of Eukaryotic initiation factor 4A-II [OS=Homo sapiens]
23.3221	23.9458	23.6479	23.6855	23.47	23.2449	22	17	23.5527	0.259248	0.0110071	P53618	COPB1	874	Coatomer subunit beta [OS=Homo sapiens]
30.9869	30.0605	30.7068	30.3097	30.349	30.6785	63	40	30.5152	0.33541	0.0109915	P04264	KRT1	875	Keratin, type II cytoskeletal 1 [OS=Homo sapiens]
24.3568	24.4639	24.5578	23.9634	24.2983	23.9048	59	7	24.2575	0.26654	0.0109879	O75347	TBCA	876	Tubulin-specific chaperone A [OS=Homo sapiens]
21.3479	21.3391	21.737	21.4175	21.8266	21.8155	10	4	21.5806	0.236341	0.0109515	Q6UX71	PLXDC2	877	Plexin domain-containing protein 2 [OS=Homo sapiens]
20.56	21.0441	20.417	20.7721	20.6973	20.5012	4	1	20.6653	0.226079	0.01094	Q9UKB3	DNAJC12	878	DnaJ homolog subfamily C member 12 [OS=Homo sapiens]
23.4053	22.8855	22.9835	23.1905	23.5508	23.3198	51	4	23.2226	0.253925	0.0109344	Q9BSF0	C2orf88	879	Small membrane A-kinase anchor protein [OS=Homo sapiens]
20.3088	20.7404	20.5702	20.8594	20.3507	20.4029	4	3	20.5387	0.224117	0.0109119	Q13617	CUL2	880	Cullin-2 [OS=Homo sapiens]
20.5484	20.2629	20.6961	20.2046	20.2736	20.1223	13	13	20.3513	0.22162	0.0108897	Q9Y210	TRPC6	881	Short transient receptor potential channel 6 [OS=Homo sapiens]
23.761	23.7224	23.3784	23.6056	23.0725	23.4659	33	3	23.501	0.255904	0.0108891	P61020	RAB5B	882	Ras-related protein Rab-5B [OS=Homo sapiens]
19.0144	18.9959	19.0031	19.1123	18.688	19.3255	16	6	19.0232	0.206365	0.0108481	P17980	PSMC3	883	26S proteasome regulatory subunit 6A [OS=Homo sapiens]
18.5698	18.4067	18.6218	18.4801	18.3474	18.0631	8	5	18.4148	0.199721	0.0108457	P26599	PTBP1	884	Isoform 3 of Polypyrimidine tract-binding protein 1 [OS=Homo sapiens]
24.158	23.6378	23.9774	23.8269	24.0939	24.3801	12	5	24.0123	0.260393	0.0108441	Q9BS26	ERP44	885	Endoplasmic reticulum resident protein 44 [OS=Homo sapiens]
21.7998	22.3183	22.5042	22.0857	22.1168	22.074	16	9	22.1498	0.239753	0.0108241	Q9UHQ4	BCAP29	886	Isoform 2 of B-cell receptor-associated protein 29 [OS=Homo sapiens]
19.5825	19.5238	19.0881	19.6866	19.407	19.35	19	1	19.4397	0.210311	0.0108186	P0DP04	IGHV3-43D	887	Immunoglobulin heavy variable 3-43D [OS=Homo sapiens]
21.9154	22.3209	21.965	22.0844	22.1385	21.6181	22	5	22.0071	0.237972	0.0108134	Q9NX40	OCIAD1	888	OCIA domain-containing protein 1 [OS=Homo sapiens]
21.1307	21.6371	21.4713	21.3516	21.2002	21.0159	29	5	21.3011	0.230202	0.010807	P16949	STMN1	889	Stathmin [OS=Homo sapiens]
22.7989	22.5417	23.0201	22.8064	22.3587	22.9151	19	5	22.7401	0.24564	0.0108021	P62140	PPP1CB	890	Serine/threonine-protein phosphatase PP1-beta catalytic subunit [OS=Homo sapiens]
21.2008	21.2886	21.3706	20.8055	20.9533	21.3339	14	5	21.1588	0.228552	0.0108017	P61421	ATP6V0D1	891	V-type proton ATPase subunit d 1 [OS=Homo sapiens]
21.9896	22.302	22.1011	22.3186	22.6414	22.0528	8	5	22.2343	0.240014	0.0107948	P63151	PPP2R2A	892	Serine/threonine-protein phosphatase 2A 55 kDa regulatory subunit B alpha isoform [OS=Homo sapiens]
23.6724	24.0507	23.8308	24.3414	23.9438	23.6601	57	7	23.9165	0.257645	0.0107727	P62942	FKBP1A	893	Peptidyl-prolyl cis-trans isomerase FKBP1A [OS=Homo sapiens]
23.2755	22.5906	22.8967	22.6487	22.9449	22.9456	20	2	22.8837	0.245916	0.0107464	P81605	DCD	894	Dermcidin [OS=Homo sapiens]
23.4037	24.1094	23.7999	23.9799	23.8933	23.6235	27	10	23.8016	0.254928	0.0107105	P35237	SERPINB6	895	serpin B6 [OS=Homo sapiens]
20.7252	21.1667	21.2147	21.3017	21.1305	20.8509	9	6	21.0649	0.225555	0.0107076	P13798	APEH	896	Acylamino-acid-releasing enzyme [OS=Homo sapiens]
21.3588	21.3742	21.5227	21.0874	21.5757	21.0114	12	3	21.3217	0.228138	0.0106998	O95249	GOSR1	897	Golgi SNAP receptor complex member 1 [OS=Homo sapiens]
22.0071	22.6568	22.2986	22.4691	22.4344	22.1228	42	1	22.3314	0.238846	0.0106955	P62820	RAB1A	898	Ras-related protein Rab-1A [OS=Homo sapiens]
22.5079	22.7598	22.66	22.6994	23.0002	22.2822	16	8	22.6516	0.241957	0.0106817	O60884	DNAJA2	899	DnaJ homolog subfamily A member 2 [OS=Homo sapiens]
23.698	23.1723	23.5245	23.087	23.1048	23.3375	25	8	23.3207	0.247955	0.0106324	P61163	ACTR1A	900	Alpha-centractin [OS=Homo sapiens]
27.96	27.0982	27.4616	27.3724	27.2944	27.5589	49	24	27.4576	0.291791	0.010627	P13647	KRT5	901	keratin, type II cytoskeletal 5 [OS=Homo sapiens]
21.1288	21.27	21.3608	20.8752	20.9647	20.7989	21	3	21.0664	0.223816	0.0106243	P24666	ACP1	902	Low molecular weight phosphotyrosine protein phosphatase [OS=Homo sapiens]
24.3101	24.4144	24.4075	24.404	24.2997	23.7482	6	4	24.264	0.257761	0.0106232	Q5T749	KPRP	903	Keratinocyte proline-rich protein [OS=Homo sapiens]
21.4655	21.8781	21.3649	21.7917	21.9331	21.7459	16	10	21.6966	0.229685	0.0105862	Q04759	PRKCQ	904	Protein kinase C theta type [OS=Homo sapiens]
21.6257	21.34	21.3519	20.96	21.2192	21.1441	23	6	21.2735	0.224775	0.010566	O00233	PSMD9	905	26S proteasome non-ATPase regulatory subunit 9 [OS=Homo sapiens]
22.3449	21.9309	22.0876	22.3423	22.4446	22.5687	34	12	22.2865	0.235452	0.0105648	O75955	FLOT1	906	Flotillin-1 [OS=Homo sapiens]
22.0158	22.0448	22.4913	22.4024	22.5522	22.1463	19	2	22.2755	0.23519	0.0105583	Q15286	RAB35	907	Ras-related protein Rab-35 [OS=Homo sapiens]
19.8296	19.9436	19.685	19.9437	20.2584	19.7086	7	2	19.8948	0.20974	0.0105425	O15194	CTDSPL	908	CTD small phosphatase-like protein [OS=Homo sapiens]
17.6316	18.1097	17.74	17.8059	17.9262	18.0694	1	1	17.8805	0.188457	0.0105398	P40818	USP8	909	ubiquitin carboxyl-terminal hydrolase 8 [OS=Homo sapiens]
20.2793	20.6508	20.4949	20.6065	20.3769	20.0794	11	2	20.4146	0.21499	0.0105312	Q99969	RARRES2	910	Retinoic acid receptor responder protein 2 [OS=Homo sapiens]
21.8207	22.1728	22.2476	22.3512	22.1562	22.5202	28	6	22.2115	0.233853	0.0105285	Q9HBH0	RHOF	911	Rho-related GTP-binding protein RhoF [OS=Homo sapiens]
22.7204	22.2621	22.8194	22.4695	22.382	22.261	17	2	22.4857	0.235765	0.0104851	Q9H4G4	GLIPR2	912	Golgi-associated plant pathogenesis-related protein 1 [OS=Homo sapiens]
23.4255	23.6579	23.5561	23.6772	23.8696	23.1504	19	5	23.5561	0.246975	0.0104845	P02746	C1QB	913	Complement C1q subcomponent subunit B [OS=Homo sapiens]
21.2812	21.51	21.2881	21.3565	21.8309	21.2364	43	5	21.4172	0.224162	0.0104664	Q15370	ELOB	914	Elongin-B [OS=Homo sapiens]
22.7236	23.2484	22.7174	23.1517	23.1341	22.8061	6	8	22.9636	0.240252	0.0104623	Q8N3D4	EHBP1L1	915	EH domain-binding protein 1-like protein 1 [OS=Homo sapiens]
19.5214	19.441	19.391	19.5772	19.0412	19.2089	10	2	19.3634	0.202558	0.0104608	Q9UK41	VPS28	916	vacuolar protein sorting-associated protein 28 homolog [OS=Homo sapiens]
25.3278	25.1251	25.1374	25.8334	25.4342	25.2318	40	10	25.3483	0.264938	0.0104519	Q15555	MAPRE2	917	Microtubule-associated protein RP/EB family member 2 [OS=Homo sapiens]
20.1361	20.1226	20.3746	19.7607	20.0128	20.2458	1	1	20.1088	0.210087	0.0104476	P17655	CAPN2	918	Calpain-2 catalytic subunit [OS=Homo sapiens]
22.4894	22.1442	22.444	21.9854	22.5526	22.1329	9	4	22.2914	0.232884	0.0104472	O75844	ZMPSTE24	919	caax prenyl protease 1 homolog [OS=Homo sapiens]
19.8897	19.8237	19.8949	19.843	19.4676	20.1048	15	2	19.8373	0.207133	0.0104416	P50851	LRBA	920	Lipopolysaccharide-responsive and beige-like anchor protein [OS=Homo sapiens]
24.9131	25.3712	25.216	25.3466	25.5301	24.8774	23	6	25.2091	0.263042	0.0104344	Q99733	NAP1L4	921	Nucleosome assembly protein 1-like 4 [OS=Homo sapiens]
20.0696	19.8978	20.226	20.1033	20.4508	20.4013	7	1	20.1915	0.210386	0.0104195	P30046	DDT	922	D-dopachrome decarboxylase [OS=Homo sapiens]
18.9201	18.6656	19.0415	18.776	18.4803	18.7724	4	1	18.776	0.195384	0.0104061	P06734	FCER2	923	Low affinity immunoglobulin epsilon Fc receptor [OS=Homo sapiens]
23.025	23.2702	23.2904	23.2068	23.347	23.7564	19	5	23.316	0.242576	0.0104039	Q9P289	STK26	924	serine/threonine-protein kinase 26 [OS=Homo sapiens]
24.6347	25.3151	24.8319	24.8075	25.2117	24.9186	34	6	24.9532	0.259393	0.0103951	P61586	RHOA	925	Transforming protein RhoA [OS=Homo sapiens]
20.6863	20.3602	20.2506	20.1489	20.4937	20.6285	26	10	20.428	0.212236	0.0103895	P18031	PTPN1	926	Tyrosine-protein phosphatase non-receptor type 1 [OS=Homo sapiens]
22.0853	21.5847	21.4832	21.777	21.968	21.7604	24	2	21.7764	0.225871	0.0103723	A0A0C4DH31	IGHV1-18	927	Immunoglobulin heavy variable 1-18 [OS=Homo sapiens]
25.0376	24.7808	24.5589	24.6331	24.881	25.2492	26	13	24.8568	0.25763	0.0103646	Q9BR76	CORO1B	928	Coronin-1B [OS=Homo sapiens]
20.6933	20.8371	20.9916	21.1311	20.7384	20.5319	10	4	20.8206	0.21551	0.0103508	Q96CW1	AP2M1	929	Isoform 2 of AP-2 complex subunit mu [OS=Homo sapiens]
27.1628	27.4735	27.1018	27.3618	27.6241	26.8423	43	5	27.2611	0.281942	0.0103423	P69905	HBA1	930	Hemoglobin subunit alpha [OS=Homo sapiens]
20.5189	20.531	20.9366	20.5795	20.3326	20.3877	9	1	20.5477	0.212248	0.0103295	Q15170	TCEAL1	931	transcription elongation factor A protein-like 1 [OS=Homo sapiens]
19.5018	19.7182	19.3819	19.9726	19.6164	19.61	3	2	19.6335	0.201815	0.0102791	O60716	CTNND1	932	Catenin delta-1 [OS=Homo sapiens]
22.3132	22.7197	22.8597	22.6867	22.3201	22.4253	22	6	22.5541	0.231425	0.0102609	P21912	SDHB	933	Succinate dehydrogenase [ubiquinone] iron-sulfur subunit, mitochondrial [OS=Homo sapiens]
23.2641	23.4734	22.8886	23.3908	22.9427	23.2662	22	10	23.2043	0.237789	0.0102476	Q9HDC9	APMAP	934	Adipocyte plasma membrane-associated protein [OS=Homo sapiens]
20.217	20.6488	20.0168	20.2891	20.3545	20.2354	21	7	20.2936	0.207731	0.0102363	Q99747	NAPG	935	Gamma-soluble NSF attachment protein [OS=Homo sapiens]
24.7032	24.2942	24.809	24.8976	24.9859	24.9185	4	3	24.768	0.251907	0.0101707	A6NDN3	GOLGA6B	936	Golgin subfamily A member 6B [OS=Homo sapiens]
21.5683	22.0468	21.867	21.7699	22.0366	21.5358	21	7	21.8041	0.221655	0.0101658	O43765	SGTA	937	Small glutamine-rich tetratricopeptide repeat-containing protein alpha [OS=Homo sapiens]
24.4967	23.8036	24.153	23.9092	24.0191	24.1937	29	6	24.0959	0.244796	0.0101592	P49913	CAMP	938	cathelicidin antimicrobial peptide [OS=Homo sapiens]
19.4539	19.533	19.3125	19.6538	19.843	19.766	4	2	19.5937	0.198873	0.0101498	P48637	GSS	939	glutathione synthetase [OS=Homo sapiens]
21.823	22.1217	21.8138	22.4141	22.0426	22.1238	8	6	22.0565	0.223754	0.0101446	Q03519	TAP2	940	antigen peptide transporter 2 [OS=Homo sapiens]
19.1383	19.3043	19.4393	19.2869	18.9927	18.9414	9	2	19.1838	0.193777	0.0101011	O14960	LECT2	941	Leukocyte cell-derived chemotaxin-2 [OS=Homo sapiens]
24.9168	25.2752	24.9076	24.9213	24.5048	25.053	1	1	24.9298	0.251347	0.0100822	O43155	FLRT2	942	Leucine-rich repeat transmembrane protein FLRT2 [OS=Homo sapiens]
19.3201	18.939	19.4467	19.2401	19.2693	19.0063	2	2	19.2036	0.19355	0.0100788	O60841	EIF5B	943	Eukaryotic translation initiation factor 5B [OS=Homo sapiens]
22.8897	23.0223	23.1526	23.1197	22.6575	22.6163	9	5	22.9097	0.230603	0.0100657	Q04446	GBE1	944	1,4-alpha-glucan-branching enzyme [OS=Homo sapiens]
21.3693	21.3885	21.4609	21.1042	21.1811	20.8948	25	10	21.2331	0.213727	0.0100657	O00231	PSMD11	945	26S proteasome non-ATPase regulatory subunit 11 [OS=Homo sapiens]
21.863	21.6232	21.8133	21.5487	21.3229	21.8752	15	2	21.6744	0.217773	0.0100475	Q99471	PFDN5	946	prefoldin subunit 5 [OS=Homo sapiens]
24.916	25.0649	24.7064	25.3224	24.8569	25.3147	31	22	25.0302	0.251151	0.0100339	Q16891	IMMT	947	Isoform 2 of MICOS complex subunit MIC60 [OS=Homo sapiens]
22.0011	22.1328	22.533	22.1908	22.2908	21.9039	26	10	22.1754	0.222406	0.0100294	P14317	HCLS1	948	Hematopoietic lineage cell-specific protein [OS=Homo sapiens]
24.9932	25.3479	25.3503	25.2973	25.3631	24.7565	42	7	25.1847	0.252444	0.0100237	P60981	DSTN	949	Destrin [OS=Homo sapiens]
23.6094	23.8214	23.4096	23.7662	23.8206	23.2549	11	11	23.6137	0.236457	0.0100136	O00410	IPO5	950	Importin-5 [OS=Homo sapiens]
19.3405	19.5565	19.3038	19.7982	19.7048	19.5061	5	1	19.535	0.195263	0.00999559	Q9BRP8	PYM1	951	Partner of Y14 and mago [OS=Homo sapiens]
18.0615	18.4924	17.9878	18.1038	18.066	18.0745	2	1	18.131	0.181179	0.00999275	O43304	SEC14L5	952	SEC14-like protein 5 [OS=Homo sapiens]
18.2744	18.2914	18.1176	18.1601	18.6096	18.1456	9	3	18.2665	0.182462	0.00998893	Q9UQ16	DNM3	953	Dynamin-3 [OS=Homo sapiens]
25.1503	25.1235	24.9199	25.3564	25.6308	25.4155	7	7	25.2661	0.2518	0.00996592	Q9UBF2	COPG2	954	Coatomer subunit gamma-2 [OS=Homo sapiens]
20.8744	20.8257	21.2071	20.812	20.8549	20.5599	24	3	20.8557	0.206972	0.00992404	P84095	RHOG	955	Rho-related GTP-binding protein RhoG [OS=Homo sapiens]
22.5403	22.6721	22.5209	22.6867	23.1419	22.7065	22	5	22.7114	0.224993	0.0099066	P42574	CASP3	956	Caspase-3 [OS=Homo sapiens]
25.7392	25.2769	25.4813	25.3043	25.6442	25.9198	36	11	25.561	0.253117	0.0099025	P40926	MDH2	957	Malate dehydrogenase, mitochondrial [OS=Homo sapiens]
23.9284	24.0705	23.63	24.0726	23.5087	23.7384	16	8	23.8248	0.235734	0.0098945	Q9NXH8	TOR4A	958	Torsin-4A [OS=Homo sapiens]
22.8308	23.1425	22.8355	22.6628	22.5832	23.1019	14	5	22.8595	0.225991	0.00988612	Q08209	PPP3CA	959	Serine/threonine-protein phosphatase 2B catalytic subunit alpha isoform [OS=Homo sapiens]
18.5414	18.9906	18.4592	18.7058	18.7102	18.7548	4	3	18.6937	0.184664	0.00987841	O94929	ABLIM3	960	Actin-binding LIM protein 3 [OS=Homo sapiens]
23.9467	24.0132	23.4964	23.54	23.5149	23.5768	17	5	23.6813	0.233829	0.00987398	P10768	ESD	961	S-formylglutathione hydrolase [OS=Homo sapiens]
22.4695	21.9025	22.2773	21.9564	22.3098	22.1285	28	4	22.174	0.218898	0.00987181	Q5JQS6	GCSAML	962	Germinal center-associated signaling and motility-like protein [OS=Homo sapiens]
18.3905	18.7083	18.6634	18.5525	18.358	18.2516	8	3	18.4874	0.182074	0.00984857	Q9BXN1	ASPN	963	Asporin [OS=Homo sapiens]
20.9412	21.1841	20.6483	20.7897	20.9345	20.6509	3	6	20.8581	0.205249	0.00984023	Q14C86	GAPVD1	964	Isoform 3 of GTPase-activating protein and VPS9 domain-containing protein 1 [OS=Homo sapiens]
22.6142	22.6237	22.8799	22.392	22.6986	22.2569	22	8	22.5776	0.22215	0.00983941	P45954	ACADSB	965	Short/branched chain specific acyl-CoA dehydrogenase, mitochondrial [OS=Homo sapiens]
22.1185	21.6728	21.8701	21.7973	21.7367	22.2076	12	1	21.9005	0.215457	0.00983798	P27449	ATP6V0C	966	V-type proton ATPase 16 kDa proteolipid subunit [OS=Homo sapiens]
22.2575	22.2237	21.9117	22.1312	22.0403	21.6824	12	11	22.0411	0.216192	0.00980859	Q96A65	EXOC4	967	Exocyst complex component 4 [OS=Homo sapiens]
18.7207	18.9129	19.1346	19.222	18.8915	18.865	20	2	18.9578	0.185621	0.00979126	Q16627	CCL14	968	Isoform HCC-3 of C-C motif chemokine 14 [OS=Homo sapiens]
22.7369	23.2537	22.8326	23.2178	23.0537	22.7949	8	10	22.9816	0.224495	0.00976845	P32019	INPP5B	969	Type II inositol 1,4,5-trisphosphate 5-phosphatase [OS=Homo sapiens]
23.1185	23.0456	23.0434	22.8769	23.0831	22.5236	19	8	22.9485	0.224109	0.00976573	Q13867	BLMH	970	bleomycin hydrolase [OS=Homo sapiens]
24.6223	24.9577	24.9046	25.1012	24.9458	24.4538	40	22	24.8309	0.242268	0.00975673	P13667	PDIA4	971	Protein disulfide-isomerase A4 [OS=Homo sapiens]
24.4973	24.7273	24.0408	24.3894	24.5603	24.6023	24	30	24.4696	0.238061	0.00972887	Q7L576	CYFIP1	972	cytoplasmic FMR1-interacting protein 1 [OS=Homo sapiens]
20.6502	20.4989	20.5924	20.9312	20.6648	20.3269	6	2	20.6107	0.200301	0.0097183	Q99598	TSNAX	973	Translin-associated protein X [OS=Homo sapiens]
23.0734	22.5026	22.7972	22.6828	22.736	23.0539	28	6	22.8076	0.22145	0.00970945	Q9NVK5	FGFR1OP2	974	FGFR1 oncogene partner 2 [OS=Homo sapiens]
21.0829	21.4304	20.8365	21.1956	20.9652	21.0402	3	5	21.0918	0.204625	0.00970165	E9PAV3	NACA	975	Nascent polypeptide-associated complex subunit alpha, muscle-specific form [OS=Homo sapiens]
20.4606	19.9914	20.42	20.1218	20.4041	20.1364	8	3	20.2557	0.196481	0.0097	P43686	PSMC4	976	Isoform 2 of 26S proteasome regulatory subunit 6B [OS=Homo sapiens]
19.4791	19.7786	19.4086	19.7124	19.5612	19.2729	10	4	19.5355	0.189369	0.00969358	Q13451	FKBP5	977	Peptidyl-prolyl cis-trans isomerase FKBP5 [OS=Homo sapiens]
18.4929	18.6451	18.879	18.9925	18.6661	18.6522	1	1	18.7213	0.181201	0.00967887	Q9C0E2	XPO4	978	Exportin-4 [OS=Homo sapiens]
20.2186	20.0859	20.2938	20.3667	20.5078	19.9625	14	1	20.2392	0.195886	0.00967854	Q9Y2S6	TMA7	979	Translation machinery-associated protein 7 [OS=Homo sapiens]
23.203	23.8638	23.5943	23.7291	23.5021	23.4755	2	6	23.5613	0.228035	0.00967838	Q8NDH2	CCDC168	980	Coiled-coil domain-containing protein 168 [OS=Homo sapiens]
21.1007	21.3757	21.5794	21.2159	21.108	21.5153	14	9	21.3158	0.206073	0.00966758	Q96T51	RUFY1	981	RUN and FYVE domain-containing protein 1 [OS=Homo sapiens]
24.6514	25.1382	24.749	24.8943	24.9278	24.4491	27	7	24.8016	0.239743	0.00966641	P30040	ERP29	982	Endoplasmic reticulum resident protein 29 [OS=Homo sapiens]
21.9898	21.8794	21.9332	21.4801	22.0808	21.966	7	2	21.8882	0.210763	0.00962907	Q99436	PSMB7	983	Proteasome subunit beta type-7 [OS=Homo sapiens]
18.7055	18.8889	18.8729	18.8144	19.0276	18.5008	5	7	18.8017	0.180934	0.0096233	P07814	EPRS1	984	Bifunctional glutamate/proline--tRNA ligase [OS=Homo sapiens]
24.0197	24.4242	24.1042	24.2364	24.4383	23.8496	9	18	24.1787	0.232427	0.00961286	Q92614	MYO18A	985	Unconventional myosin-XVIIIa [OS=Homo sapiens]
24.5045	24.8952	24.8175	25.0234	24.9572	24.4619	48	4	24.7766	0.237635	0.00959111	P22392	NME2	986	Isoform 3 of Nucleoside diphosphate kinase B [OS=Homo sapiens]
26.3585	26.7969	26.8784	26.4255	26.2718	26.3734	29	8	26.5174	0.254256	0.00958826	Q9H444	CHMP4B	987	Charged multivesicular body protein 4b [OS=Homo sapiens]
22.6801	22.6394	22.3941	22.7292	23.017	22.4809	22	5	22.6568	0.217132	0.00958352	Q96HS1	PGAM5	988	Serine/threonine-protein phosphatase Pgam5, mitochondrial [OS=Homo sapiens]
23.588	23.2142	23.4003	23.1498	22.9456	23.3572	43	5	23.2759	0.22286	0.00957474	Q9BV40	VAMP8	989	vesicle-associated membrane protein 8 [OS=Homo sapiens]
21.1482	21.5074	21.4194	21.4248	21.7384	21.2558	9	13	21.4157	0.204822	0.0095641	Q9H2M9	RAB3GAP2	990	Rab3 GTPase-activating protein non-catalytic subunit [OS=Homo sapiens]
18.8455	18.7701	18.85	19.261	18.846	18.8131	23	1	18.8976	0.180613	0.00955748	O43852	CALU	991	Calumenin [OS=Homo sapiens]
22.2579	22.6368	22.6237	22.2562	22.6378	22.7538	22	7	22.5277	0.214887	0.00953878	P22695	UQCRC2	992	Cytochrome b-c1 complex subunit 2, mitochondrial [OS=Homo sapiens]
22.1845	21.9813	22.3287	22.335	22.4683	22.5861	18	8	22.314	0.212608	0.00952802	P54578	USP14	993	Ubiquitin carboxyl-terminal hydrolase 14 [OS=Homo sapiens]
23.052	23.4466	23.2811	23.4133	23.6117	23.0674	29	5	23.312	0.222076	0.00952626	Q9P0L0	VAPA	994	vesicle-associated membrane protein-associated protein A [OS=Homo sapiens]
23.2012	23.4973	23.2657	23.483	22.9675	23.0335	25	10	23.2414	0.221047	0.00951094	Q93052	LPP	995	Lipoma-preferred partner [OS=Homo sapiens]
21.0698	21.1418	21.1409	21.528	21.5167	21.2094	2	1	21.2678	0.20213	0.00950404	Q9BPX6	MICU1	996	Calcium uptake protein 1, mitochondrial [OS=Homo sapiens]
20.8903	21.205	20.917	21.1977	21.3842	21.2904	11	12	21.1475	0.200796	0.00949504	Q5M775	SPECC1	997	Cytospin-B [OS=Homo sapiens]
21.4593	21.7435	21.5818	21.9392	22.0004	21.7078	9	8	21.7387	0.206074	0.00947962	Q9HC35	EML4	998	Echinoderm microtubule-associated protein-like 4 [OS=Homo sapiens]
18.2751	18.5936	18.5873	18.8094	18.5557	18.4583	11	4	18.5466	0.175793	0.00947849	O43813	LANCL1	999	LanC-like protein 1 [OS=Homo sapiens]
23.8877	24.3093	24.2836	24.1987	24.0672	23.7406	33	3	24.0812	0.228234	0.00947771	P30466	HLA-B	1000	HLA class I histocompatibility antigen, B-18 alpha chain [OS=Homo sapiens]
19.5986	19.3478	19.3383	19.1767	19.5036	19.6677	5	8	19.4388	0.18394	0.00946251	Q66K14	TBC1D9B	1001	TBC1 domain family member 9B [OS=Homo sapiens]
20.2938	20.2553	20.2167	20.3511	20.4372	20.7434	5	5	20.3829	0.192745	0.00945619	P14735	IDE	1002	insulin-degrading enzyme [OS=Homo sapiens]
21.125	20.6032	20.9656	21.0936	20.8038	20.8283	15	3	20.9033	0.197403	0.00944364	P07360	C8G	1003	Complement component C8 gamma chain [OS=Homo sapiens]
21.924	21.7467	21.9599	21.9106	22.1355	22.3435	6	2	22.0034	0.207755	0.00944197	Q9NZJ7	MTCH1	1004	Mitochondrial carrier homolog 1 [OS=Homo sapiens]
23.4011	23.122	23.4154	23.726	23.4712	23.1628	9	11	23.3831	0.220656	0.00943655	Q14432	PDE3A	1005	cGMP-inhibited 3',5'-cyclic phosphodiesterase A [OS=Homo sapiens]
23.2309	23.6714	23.5767	23.5152	23.9101	23.5143	32	9	23.5698	0.222279	0.00943067	P38117	ETFB	1006	electron transfer flavoprotein subunit beta [OS=Homo sapiens]
22.4601	22.659	23.0412	22.6321	22.4558	22.6444	17	6	22.6487	0.213168	0.00941192	O60496	DOK2	1007	Docking protein 2 [OS=Homo sapiens]
18.1758	18.4464	18.2811	18.4618	18.5291	18.1016	5	1	18.3326	0.172544	0.00941184	Q9Y237	PIN4	1008	Peptidyl-prolyl cis-trans isomerase NIMA-interacting 4 [OS=Homo sapiens]
23.5009	23.0954	23.3181	22.8639	23.2947	23.2584	34	9	23.2219	0.218109	0.00939239	P25786	PSMA1	1009	Proteasome subunit alpha type-1 [OS=Homo sapiens]
23.6904	23.8815	23.9607	23.9191	23.7571	24.3292	16	10	23.923	0.223523	0.00934345	P0C7P3	SLFN14	1010	Isoform 2 of Protein SLFN14 [OS=Homo sapiens]
22.1865	22.618	22.3155	22.5121	22.6172	22.1574	12	4	22.4011	0.209222	0.00933981	Q5SQ64	LY6G6F	1011	Lymphocyte antigen 6 complex locus protein G6f [OS=Homo sapiens]
26.9596	26.9528	27.1934	26.8497	26.5294	26.5847	21	20	26.8449	0.2504	0.00932764	Q9Y4L1	HYOU1	1012	Hypoxia up-regulated protein 1 [OS=Homo sapiens]
19.7505	19.5523	19.4942	19.6318	19.9771	19.5209	2	1	19.6545	0.183172	0.0093196	Q9C035	TRIM5	1013	Tripartite motif-containing protein 5 [OS=Homo sapiens]
23.6152	23.1595	23.5833	23.2472	23.1385	23.5066	17	8	23.3751	0.217756	0.00931576	Q8IUI8	CRLF3	1014	Cytokine receptor-like factor 3 [OS=Homo sapiens]
21.708	21.7962	21.9578	22.1888	21.9039	21.6148	16	11	21.8616	0.20341	0.00930442	Q684P5	RAP1GAP2	1015	Isoform 2 of Rap1 GTPase-activating protein 2 [OS=Homo sapiens]
23.0306	23.5612	23.199	23.2327	23.1457	22.9364	14	3	23.1843	0.215017	0.00927428	O75954	TSPAN9	1016	tetraspanin-9 [OS=Homo sapiens]
22.2432	21.8657	22.1751	22.2228	22.4945	22.0901	17	1	22.1819	0.205718	0.00927415	P01614	IGKV2D-40	1017	Immunoglobulin kappa variable 2D-40 [OS=Homo sapiens]
23.2607	23.0773	23.2329	23.4765	22.8399	23.0863	39	8	23.1623	0.214639	0.00926675	Q9NS28	RGS18	1018	Regulator of G-protein signaling 18 [OS=Homo sapiens]
24.2131	23.9751	24.0706	23.663	23.6666	23.8585	29	4	23.9078	0.221273	0.00925528	Q9NR31	SAR1A	1019	GTP-binding protein SAR1a [OS=Homo sapiens]
21.9541	21.6347	21.36	21.7554	21.7411	21.8124	19	1	21.7096	0.200622	0.00924118	P01768	IGHV3-30	1020	Immunoglobulin heavy variable 3-30 [OS=Homo sapiens]
19.8934	19.7695	19.426	19.8754	19.7059	19.9022	8	1	19.7621	0.18215	0.00921716	P61960	UFM1	1021	Ubiquitin-fold modifier 1 [OS=Homo sapiens]
24.3852	24.4387	24.3657	24.745	24.4967	24.9273	29	17	24.5598	0.226339	0.00921586	P27338	MAOB	1022	Amine oxidase [flavin-containing] B [OS=Homo sapiens]
22.3196	22.345	22.1284	22.6768	22.5935	22.5564	6	4	22.4366	0.206757	0.00921515	P18433	PTPRA	1023	Receptor-type tyrosine-protein phosphatase alpha [OS=Homo sapiens]
22.8936	22.565	22.5127	22.9729	22.7115	22.9986	11	8	22.7757	0.209836	0.00921314	Q9NY33	DPP3	1024	Isoform 4 of Dipeptidyl peptidase 3 [OS=Homo sapiens]
24.8144	25.1592	25.0493	25.1796	25.4433	24.8627	21	10	25.0847	0.230991	0.00920841	P11597	CETP	1025	cholesteryl ester transfer protein [OS=Homo sapiens]
21.4445	21.318	21.5428	21.7846	21.4064	21.7861	25	1	21.5471	0.198173	0.0091972	A0A0B4J1X5	IGHV3-74	1026	immunoglobulin heavy variable 3-74 [OS=Homo sapiens]
18.4823	18.5851	18.4656	18.4328	18.1613	18.6546	9	2	18.4636	0.169682	0.00919007	Q14088	RAB33A	1027	Ras-related protein Rab-33A [OS=Homo sapiens]
23.7622	23.2418	23.5739	23.558	23.1984	23.5117	7	5	23.4743	0.215096	0.00916305	Q16204	CCDC6	1028	coiled-coil domain-containing protein 6 [OS=Homo sapiens]
19.3803	19.5634	19.0871	19.1877	19.1402	19.2836	3	1	19.2737	0.17629	0.00914668	O14545	TRAFD1	1029	TRAF-type zinc finger domain-containing protein 1 [OS=Homo sapiens]
20.8219	21.1716	21.0147	20.9048	20.8391	20.6082	1	1	20.8934	0.19062	0.00912347	O43196	MSH5	1030	mutS protein homolog 5 [OS=Homo sapiens]
22.3407	22.6136	22.3324	22.5304	22.6676	22.8694	25	8	22.559	0.205404	0.00910518	Q9Y2Z0	SUGT1	1031	Protein SGT1 homolog [OS=Homo sapiens]
22.1986	22.4901	22.7174	22.4469	22.4848	22.1732	9	8	22.4185	0.204028	0.00910088	P55060	CSE1L	1032	Isoform 3 of Exportin-2 [OS=Homo sapiens]
26.5482	26.5902	26.4226	26.3041	26.4143	26.9891	58	12	26.5447	0.24058	0.0090632	P52566	ARHGDIB	1033	Rho GDP-dissociation inhibitor 2 [OS=Homo sapiens]
24.875	24.7226	24.5192	24.8823	24.2996	24.6631	17	3	24.6603	0.223286	0.00905446	P02766	TTR	1034	Transthyretin [OS=Homo sapiens]
24.4988	24.8466	24.4378	24.3698	24.3029	24.7748	28	6	24.5385	0.222023	0.00904796	O15145	ARPC3	1035	Actin-related protein 2/3 complex subunit 3 [OS=Homo sapiens]
24.0045	24.6212	24.3008	24.3181	24.0886	24.1539	40	8	24.2478	0.219313	0.00904465	P52565	ARHGDIA	1036	rho GDP-dissociation inhibitor 1 [OS=Homo sapiens]
18.9836	19.2611	19.0102	19.2541	19.0015	18.8188	3	1	19.0549	0.171974	0.00902522	O43681	GET3	1037	ATPase ASNA1 [OS=Homo sapiens]
24.3419	24.1892	24.4685	24.0127	23.8732	24.0958	13	5	24.1636	0.217783	0.00901287	Q99704	DOK1	1038	docking protein 1 [OS=Homo sapiens]
20.3898	20.463	19.9448	20.2381	20.3511	20.2359	17	3	20.2704	0.182276	0.00899221	O43583	DENR	1039	density-regulated protein [OS=Homo sapiens]
24.7845	25.0867	24.8404	24.6761	24.5673	24.4548	2	3	24.735	0.222418	0.00899206	Q08050	FOXM1	1040	Isoform 4 of Forkhead box protein M1 [OS=Homo sapiens]
21.8126	22.2687	21.9824	22.3158	22.2712	22.1723	6	7	22.1372	0.198852	0.00898273	P08648	ITGA5	1041	Integrin alpha-5 [OS=Homo sapiens]
21.9121	22.2589	22.3645	22.0046	21.9504	21.8949	7	3	22.0643	0.198187	0.00898227	P56202	CTSW	1042	cathepsin W [OS=Homo sapiens]
20.9299	20.8509	20.8385	21.1037	21.1837	21.2954	5	2	21.0337	0.188781	0.00897516	Q9BTV4	TMEM43	1043	Transmembrane protein 43 [OS=Homo sapiens]
20.6459	20.9648	20.9258	20.8159	20.7339	20.4658	3	1	20.7587	0.185886	0.00895462	Q92504	SLC39A7	1044	Zinc transporter SLC39A7 [OS=Homo sapiens]
27.1734	26.5968	27.0254	26.5817	26.9449	26.9716	54	8	26.8823	0.2404	0.00894268	P61981	YWHAG	1045	14-3-3 protein gamma [OS=Homo sapiens]
21.3016	20.779	21.1133	21.0475	20.9215	20.8798	8	1	21.0071	0.187203	0.0089114	P01714	IGLV3-19	1046	Immunoglobulin lambda variable 3-19 [OS=Homo sapiens]
25.306	25.6247	25.646	25.73	26.0169	25.6886	45	2	25.6687	0.227761	0.0088731	P68363	TUBA1B	1047	Tubulin alpha-1B chain [OS=Homo sapiens]
24.7911	24.5188	24.804	24.2888	24.8578	24.7292	26	10	24.665	0.218837	0.00887238	P48426	PIP4K2A	1048	phosphatidylinositol 5-phosphate 4-kinase type-2 alpha [OS=Homo sapiens]
21.2815	21.7161	21.5591	21.7948	21.6498	21.4248	11	6	21.571	0.191119	0.00885998	Q15067	ACOX1	1049	Peroxisomal acyl-coenzyme A oxidase 1 [OS=Homo sapiens]
21.5648	21.5938	21.3747	21.5414	21.747	21.9317	11	11	21.6256	0.191403	0.00885075	Q6ZU35	CRACD	1050	Uncharacterized protein KIAA1211 [OS=Homo sapiens]
23.6711	23.3514	23.881	23.554	23.8728	23.5179	15	7	23.6414	0.209207	0.00884917	P17252	PRKCA	1051	Protein kinase C alpha type [OS=Homo sapiens]
22.6434	22.4733	22.4548	22.48	22.5473	22.0639	23	3	22.4438	0.198578	0.00884781	P61018	RAB4B	1052	Ras-related protein Rab-4B [OS=Homo sapiens]
24.121	24.316	24.079	23.9817	23.7451	24.2995	6	3	24.0904	0.212943	0.00883933	Q9HB21	PLEKHA1	1053	pleckstrin homology domain-containing family A member 1 [OS=Homo sapiens]
21.6162	21.8095	21.375	21.9413	21.7266	21.7064	6	4	21.6958	0.191601	0.00883122	Q4KMP7	TBC1D10B	1054	TBC1 domain family member 10B [OS=Homo sapiens]
21.5381	21.4673	21.4753	21.2364	21.1124	21.1354	15	7	21.3275	0.188244	0.00882637	Q8WXF7	ATL1	1055	Atlastin-1 [OS=Homo sapiens]
21.5053	21.4732	21.4961	21.4533	21.1206	21.1167	21	2	21.3609	0.188518	0.00882539	P10599	TXN	1056	thioredoxin [OS=Homo sapiens]
17.3495	17.6756	17.7242	17.7619	17.6118	17.4982	1	1	17.6035	0.15526	0.00881984	B1AK53	ESPN	1057	espin [OS=Homo sapiens]
18.3011	18.5642	18.5475	18.3325	18.2672	18.1571	4	3	18.3616	0.161758	0.00880959	O43432	EIF4G3	1058	Eukaryotic translation initiation factor 4 gamma 3 [OS=Homo sapiens]
22.2071	22.407	22.1725	22.3713	22.5686	22.6765	14	5	22.4005	0.197326	0.00880899	Q15008	PSMD6	1059	26S proteasome non-ATPase regulatory subunit 6 [OS=Homo sapiens]
18.8924	19.1394	19.2095	19.3619	19.1703	19.3349	9	3	19.1847	0.168717	0.00879431	Q96IJ6	GMPPA	1060	Mannose-1-phosphate guanyltransferase alpha [OS=Homo sapiens]
22.8985	22.4755	22.5088	22.6347	22.7435	22.956	20	11	22.7028	0.199001	0.00876547	Q9UHD8	SEPTIN9	1061	Isoform 2 of Septin-9 [OS=Homo sapiens]
24.0602	24.1359	24.2861	23.9019	23.6874	23.901	8	5	23.9954	0.21021	0.00876041	O95197	RTN3	1062	Isoform 2 of Reticulon-3 [OS=Homo sapiens]
20.9563	20.9018	20.79	20.9992	21.2588	20.7447	6	4	20.9418	0.183016	0.00873927	O00391	QSOX1	1063	Sulfhydryl oxidase 1 [OS=Homo sapiens]
19.5355	19.6185	19.5879	19.9967	19.8069	19.7658	13	1	19.7186	0.172056	0.00872556	Q9P2X0	DPM3	1064	Dolichol-phosphate mannosyltransferase subunit 3 [OS=Homo sapiens]
26.0934	26.0341	26.2276	25.9244	25.6516	25.7031	12	2	25.939	0.225681	0.00870043	P11169	SLC2A3	1065	Solute carrier family 2, facilitated glucose transporter member 3 [OS=Homo sapiens]
19.6044	19.51	19.8676	19.9371	19.8931	19.7486	21	1	19.7601	0.171731	0.00869079	P20339	RAB5A	1066	Ras-related protein Rab-5A [OS=Homo sapiens]
22.7931	23.2982	23.0089	23.0094	23.1145	22.7665	24	7	22.9984	0.199735	0.00868471	P28482	MAPK1	1067	mitogen-activated protein kinase 1 [OS=Homo sapiens]
25.298	25.7892	25.6077	25.4744	25.9182	25.5473	40	8	25.6058	0.222124	0.00867474	P55145	MANF	1068	Mesencephalic astrocyte-derived neurotrophic factor [OS=Homo sapiens]
20.8558	21.2646	21.2917	21.3645	21.3093	21.2445	27	2	21.2217	0.183942	0.00866761	P51148	RAB5C	1069	Ras-related protein Rab-5C [OS=Homo sapiens]
24.9761	25.0223	24.9182	25.0825	24.8434	25.4601	9	3	25.0504	0.217061	0.00866497	P13598	ICAM2	1070	Intercellular adhesion molecule 2 [OS=Homo sapiens]
22.6092	22.2059	22.4076	22.3217	22.4606	22.062	42	14	22.3445	0.193412	0.00865589	P07355	ANXA2	1071	Annexin A2 [OS=Homo sapiens]
19.274	19.5269	19.3611	19.404	19.543	19.0953	9	2	19.3674	0.167591	0.00865329	P15121	AKR1B1	1072	aldose reductase [OS=Homo sapiens]
24.2908	23.8046	23.9926	23.7475	23.8224	24.0836	26	12	23.9569	0.20687	0.00863509	Q6DD88	ATL3	1073	Atlastin-3 [OS=Homo sapiens]
23.264	22.826	22.8911	23.2028	23.1011	23.3065	11	5	23.0986	0.199435	0.00863407	Q8NBX0	SCCPDH	1074	saccharopine dehydrogenase-like oxidoreductase [OS=Homo sapiens]
20.8624	20.7497	21.0346	20.7822	21.1687	21.131	3	4	20.9548	0.180877	0.00863176	P20936	RASA1	1075	ras GTPase-activating protein 1 [OS=Homo sapiens]
22.6368	22.5872	22.9146	22.6299	22.8613	22.3779	13	4	22.6679	0.195599	0.0086289	Q92747	ARPC1A	1076	Actin-related protein 2/3 complex subunit 1A [OS=Homo sapiens]
25.119	25.3815	24.9507	25.2458	25.1368	25.5685	37	8	25.2337	0.217612	0.00862386	P08134	RHOC	1077	Rho-related GTP-binding protein RhoC [OS=Homo sapiens]
22.6412	23.2079	22.9233	23.1207	23.0166	22.9053	16	4	22.9691	0.197967	0.00861884	P55957	BID	1078	BH3-interacting domain death agonist [OS=Homo sapiens]
21.3772	21.3789	21.3473	21.8127	21.4843	21.6437	13	1	21.5074	0.185158	0.00860905	P01704	IGLV2-14	1079	Immunoglobulin lambda variable 2-14 [OS=Homo sapiens]
19.1327	18.8162	19.0848	19.0669	19.3212	19.0144	11	15	19.0727	0.164132	0.00860562	Q16531	DDB1	1080	DNA damage-binding protein 1 [OS=Homo sapiens]
23.0341	23.375	23.1112	23.2956	23.3839	22.8984	27	6	23.1831	0.199129	0.00858942	P35813	PPM1A	1081	Protein phosphatase 1A [OS=Homo sapiens]
22.8463	23.0527	22.9645	22.8612	22.735	22.4921	28	7	22.8253	0.19596	0.00858518	P09497	CLTB	1082	clathrin light chain B [OS=Homo sapiens]
20.3809	19.9279	19.9751	20.2086	20.1063	20.256	8	6	20.1425	0.172913	0.0085845	O94886	TMEM63A	1083	CSC1-like protein 1 [OS=Homo sapiens]
20.93	20.8572	20.8331	20.8973	21.0791	21.306	6	3	20.9838	0.180013	0.00857866	Q92575	UBXN4	1084	UBX domain-containing protein 4 [OS=Homo sapiens]
23.6755	23.7236	23.6414	23.1825	23.4634	23.6357	12	4	23.5537	0.202035	0.00857763	P02686	MBP	1085	myelin basic protein [OS=Homo sapiens]
28.3068	28.4539	28.0899	28.5187	28.4932	27.9247	5	3	28.2979	0.242433	0.00856717	Q8TEC5	SH3RF2	1086	Putative E3 ubiquitin-protein ligase SH3RF2 [OS=Homo sapiens]
25.5605	26.0437	25.8975	25.6611	25.9709	26.1235	33	23	25.8762	0.221167	0.00854713	Q9NQ75	CASS4	1087	Cas scaffolding protein family member 4 [OS=Homo sapiens]
19.053	18.8822	19.2961	19.1831	19.1608	18.9095	6	1	19.0808	0.162957	0.00854037	Q13526	PIN1	1088	peptidyl-prolyl cis-trans isomerase NIMA-interacting 1 [OS=Homo sapiens]
19.4246	19.5299	19.2989	19.3107	19.2443	19.0462	6	4	19.3091	0.164661	0.00852765	Q93050	ATP6V0A1	1089	Isoform 2 of V-type proton ATPase 116 kDa subunit a isoform 1 [OS=Homo sapiens]
22.552	22.6918	22.8704	22.4493	22.3158	22.5916	24	3	22.5785	0.192162	0.00851085	P84085	ARF5	1090	ADP-ribosylation factor 5 [OS=Homo sapiens]
22.3578	22.2942	22.2829	22.6755	22.0927	22.3784	23	8	22.3469	0.190039	0.00850403	Q9UNZ2	NSFL1C	1091	NSFL1 cofactor p47 [OS=Homo sapiens]
20.9405	20.9508	20.9448	21.2697	20.9367	21.3078	20	9	21.0584	0.178933	0.00849701	P41091	EIF2S3	1092	eukaryotic translation initiation factor 2 subunit 3 [OS=Homo sapiens]
26.4861	26.9872	26.4379	26.6003	26.5324	26.3383	51	3	26.5637	0.225521	0.00848981	Q9H0U4	RAB1B	1093	ras-related protein Rab-1B [OS=Homo sapiens]
18.8678	19.1455	19.3387	19.0376	19.2282	19.0876	7	5	19.1176	0.162224	0.0084856	Q7L1W4	LRRC8D	1094	volume-regulated anion channel subunit LRRC8D [OS=Homo sapiens]
19.3839	19.3871	19.7537	19.706	19.5948	19.7089	2	1	19.5891	0.16618	0.0084833	P02545	LMNA	1095	Prelamin-A/C [OS=Homo sapiens]
20.3963	20.2206	20.3976	19.9649	20.0968	20.2878	17	2	20.2273	0.171551	0.00848115	P08493	MGP	1096	matrix Gla protein [OS=Homo sapiens]
20.0784	20.3732	20.1852	20.3108	20.0542	19.9168	13	5	20.1531	0.170598	0.00846508	P05154	SERPINA5	1097	Plasma serine protease inhibitor [OS=Homo sapiens]
29.4359	29.3985	29.307	29.2572	29.3095	28.7569	23	23	29.2442	0.247541	0.00846462	P19823	ITIH2	1098	Inter-alpha-trypsin inhibitor heavy chain H2 [OS=Homo sapiens]
22.3152	22.2958	22.4595	21.9425	22.2416	22.4479	8	6	22.2837	0.188258	0.00844824	P42892	ECE1	1099	Endothelin-converting enzyme 1 [OS=Homo sapiens]
18.5194	18.8832	18.5388	18.8593	18.6116	18.6779	5	1	18.6817	0.157367	0.00842359	Q5W111	SPRYD7	1100	SPRY domain-containing protein 7 [OS=Homo sapiens]
25.6454	25.6722	25.6224	25.4403	25.1075	25.5873	31	6	25.5125	0.214522	0.00840851	P14770	GP9	1101	Platelet glycoprotein IX [OS=Homo sapiens]
24.3375	24.488	24.1766	24.4787	24.7964	24.5035	27	17	24.4634	0.205635	0.00840582	P11216	PYGB	1102	Glycogen phosphorylase, brain form [OS=Homo sapiens]
21.1181	20.907	20.8735	20.7917	20.6956	21.1335	31	6	20.9199	0.175479	0.00838812	Q15126	PMVK	1103	phosphomevalonate kinase [OS=Homo sapiens]
21.5121	21.38	21.7943	21.4605	21.5021	21.2531	15	3	21.4837	0.180067	0.00838156	Q9UL25	RAB21	1104	Ras-related protein Rab-21 [OS=Homo sapiens]
21.4973	21.189	21.5212	21.3386	21.3132	21.6888	10	1	21.4247	0.17875	0.00834317	Q96BM9	ARL8A	1105	ADP-ribosylation factor-like protein 8A [OS=Homo sapiens]
23.721	23.748	24.0522	24.1107	24.1922	24.0884	25	19	23.9854	0.199871	0.00833303	Q14BN4	SLMAP	1106	Isoform 3 of Sarcolemmal membrane-associated protein [OS=Homo sapiens]
19.8845	19.7025	19.6667	19.85	19.8861	20.1305	5	2	19.8534	0.165193	0.00832064	Q9BZV1	UBXN6	1107	UBX domain-containing protein 6 [OS=Homo sapiens]
26.8078	26.9869	27.0839	26.8035	26.7097	26.448	24	6	26.8066	0.222447	0.00829819	P25788	PSMA3	1108	Isoform 2 of Proteasome subunit alpha type-3 [OS=Homo sapiens]
21.9563	22.4116	22.2697	22.0865	22.0599	22.3676	15	5	22.1919	0.183991	0.00829088	P21964	COMT	1109	Catechol O-methyltransferase [OS=Homo sapiens]
17.6964	17.4172	17.6614	17.6844	17.7551	17.4296	8	6	17.6074	0.145847	0.0082833	Q9NUB1	ACSS1	1110	Acetyl-coenzyme A synthetase 2-like, mitochondrial [OS=Homo sapiens]
20.699	20.6466	20.2655	20.4355	20.6645	20.461	21	4	20.5287	0.169626	0.0082629	P28065	PSMB9	1111	Proteasome subunit beta type-9 [OS=Homo sapiens]
25.7705	26.1064	25.8712	26.116	25.9255	25.5509	27	28	25.8901	0.2139	0.00826184	Q27J81	INF2	1112	Isoform 2 of Inverted formin-2 [OS=Homo sapiens]
20.552	20.4748	20.4254	20.0866	20.3436	20.5043	10	4	20.3978	0.168289	0.00825035	P62495	ETF1	1113	Eukaryotic peptide chain release factor subunit 1 [OS=Homo sapiens]
20.0156	20.2674	19.9057	19.8431	20.1037	20.197	8	4	20.0554	0.165148	0.0082346	Q9Y265	RUVBL1	1114	RuvB-like 1 [OS=Homo sapiens]
22.2085	22.6945	22.2513	22.3107	22.3237	22.2115	22	10	22.3334	0.183407	0.00821224	Q86UE4	MTDH	1115	protein LYRIC [OS=Homo sapiens]
21.5273	21.8374	21.9578	21.8905	22.0532	21.8048	24	20	21.8452	0.179312	0.00820834	P53814	SMTN	1116	Smoothelin [OS=Homo sapiens]
22.6844	23.0334	22.7194	22.7351	22.5006	22.916	32	3	22.7648	0.186648	0.00819895	Q6IAA8	LAMTOR1	1117	ragulator complex protein LAMTOR1 [OS=Homo sapiens]
18.6401	18.8245	18.3956	18.4759	18.6019	18.4935	1	1	18.5719	0.152192	0.00819473	Q6P3X3	TTC27	1118	tetratricopeptide repeat protein 27 [OS=Homo sapiens]
23.1654	22.9634	23.1186	23.1225	23.3262	23.5081	40	6	23.2007	0.190104	0.00819388	P30086	PEBP1	1119	phosphatidylethanolamine-binding protein 1 [OS=Homo sapiens]
19.3488	19.3862	19.5758	19.6702	19.2357	19.3926	4	1	19.4349	0.159038	0.00818311	Q14093	CYLC2	1120	Cylicin-2 [OS=Homo sapiens]
22.1822	22.5712	22.6575	22.6266	22.6234	22.4102	28	10	22.5118	0.184028	0.0081747	Q9HC38	GLOD4	1121	Glyoxalase domain-containing protein 4 [OS=Homo sapiens]
24.0649	24.5013	24.4134	24.6077	24.4373	24.2111	34	5	24.3726	0.199226	0.00817416	O60234	GMFG	1122	glia maturation factor gamma [OS=Homo sapiens]
23.8729	23.9804	23.7374	23.5026	23.538	23.8648	25	10	23.7494	0.193735	0.00815748	O60268	KIAA0513	1123	Uncharacterized protein KIAA0513 [OS=Homo sapiens]
24.581	24.653	24.9633	24.7822	24.7599	24.3718	38	8	24.6852	0.201217	0.00815134	P29692	EEF1D	1124	Elongation factor 1-delta [OS=Homo sapiens]
23.7888	23.3028	23.5575	23.4909	23.7236	23.7787	9	10	23.6071	0.192134	0.00813883	P42338	PIK3CB	1125	Phosphatidylinositol 4,5-bisphosphate 3-kinase catalytic subunit beta isoform [OS=Homo sapiens]
25.3295	25.9374	25.7038	25.773	25.6677	25.5341	28	4	25.6576	0.208191	0.00811421	Q9HAV0	GNB4	1126	Guanine nucleotide-binding protein subunit beta-4 [OS=Homo sapiens]
21.2591	21.4279	21.3618	21.5882	21.372	21.0705	20	6	21.3466	0.173054	0.00810686	P62714	PPP2CB	1127	serine/threonine-protein phosphatase 2A catalytic subunit beta isoform [OS=Homo sapiens]
21.2026	21.0966	21.1443	21.4839	21.2954	21.5017	22	1	21.2874	0.172443	0.0081007	A0A0C4DH25	IGKV3D-20	1128	immunoglobulin kappa variable 3D-20 [OS=Homo sapiens]
25.5194	25.844	25.7124	25.7651	25.9868	25.4226	40	1	25.7084	0.208113	0.00809513	P07437	TUBB	1129	tubulin beta chain [OS=Homo sapiens]
24.4674	24.9826	24.7983	24.5852	24.6086	24.4868	28	21	24.6548	0.199185	0.00807895	P43304	GPD2	1130	Glycerol-3-phosphate dehydrogenase, mitochondrial [OS=Homo sapiens]
20.7692	21.235	20.9327	21.0771	21.1702	21.0983	1	1	21.0471	0.16987	0.00807095	Q9ULV0	MYO5B	1131	unconventional myosin-Vb [OS=Homo sapiens]
21.4783	21.7835	21.4494	21.4433	21.2753	21.6178	28	3	21.5079	0.17354	0.00806865	P61803	DAD1	1132	Dolichyl-diphosphooligosaccharide--protein glycosyltransferase subunit DAD1 [OS=Homo sapiens]
24.0686	23.8964	24.453	24.1108	24.2294	24.3034	25	10	24.1769	0.194818	0.00805801	P00390	GSR	1133	Isoform Cytoplasmic of Glutathione reductase, mitochondrial [OS=Homo sapiens]
24.7293	24.414	24.3575	24.6475	24.8712	24.7152	23	9	24.6224	0.198067	0.00804417	P62333	PSMC6	1134	26S proteasome regulatory subunit 10B [OS=Homo sapiens]
26.0062	26.4194	26.1336	26.137	26.2564	25.805	51	24	26.1263	0.210058	0.00804013	O43707	ACTN4	1135	Alpha-actinin-4 [OS=Homo sapiens]
19.8734	19.5108	19.4798	19.5921	19.7217	19.4869	7	3	19.6108	0.157559	0.00803429	Q15517	CDSN	1136	corneodesmosin [OS=Homo sapiens]
24.1846	24.3142	24.1734	24.2258	24.2138	23.7631	32	14	24.1458	0.193967	0.00803315	Q9NTK5	OLA1	1137	obg-like ATPase 1 [OS=Homo sapiens]
25.4011	25.1802	25.0043	25.4811	25.5513	25.2815	28	6	25.3166	0.203288	0.00802983	P20851	C4BPB	1138	C4b-binding protein beta chain [OS=Homo sapiens]
22.8539	23.2233	22.9729	22.7652	23.1198	23.1774	31	2	23.0187	0.184826	0.00802938	Q8IZP0	ABI1	1139	Isoform 8 of Abl interactor 1 [OS=Homo sapiens]
22.9239	22.9366	22.8489	22.9736	22.5631	22.5885	13	3	22.8058	0.182888	0.00801937	P68036	UBE2L3	1140	Ubiquitin-conjugating enzyme E2 L3 [OS=Homo sapiens]
19.0485	19.3747	18.9619	19.0327	19.0025	19.1772	14	4	19.0996	0.153077	0.00801469	Q9Y6C9	MTCH2	1141	Mitochondrial carrier homolog 2 [OS=Homo sapiens]
20.6709	20.3787	20.63	20.8942	20.6823	20.6978	11	3	20.659	0.165489	0.0080105	Q00059	TFAM	1142	Transcription factor A, mitochondrial [OS=Homo sapiens]
21.6568	21.445	21.4841	21.6585	21.7764	21.9047	8	5	21.6542	0.173416	0.00800842	Q8N573	OXR1	1143	Isoform 5 of Oxidation resistance protein 1 [OS=Homo sapiens]
23.1287	23.4555	22.9226	23.3301	23.2854	23.1548	16	10	23.2128	0.185799	0.00800415	P05156	CFI	1144	Complement factor I [OS=Homo sapiens]
29.0577	29.0701	29.0306	28.5515	28.6173	28.8397	32	25	28.8612	0.231008	0.00800413	P00736	C1R	1145	Complement C1r subcomponent [OS=Homo sapiens]
24.0334	23.9412	23.9505	24.2889	23.6928	23.9931	33	11	23.9833	0.191436	0.00798202	Q8TC12	RDH11	1146	Retinol dehydrogenase 11 [OS=Homo sapiens]
23.9324	23.8406	23.5107	23.9318	24.0454	23.7234	2	12	23.8307	0.19011	0.00797751	Q03164	KMT2A	1147	Histone-lysine N-methyltransferase 2A [OS=Homo sapiens]
22.8913	22.6399	22.5336	22.587	22.9907	22.7846	8	6	22.7379	0.180966	0.00795879	Q6EMK4	VASN	1148	vasorin [OS=Homo sapiens]
23.5723	23.6906	24.0362	23.7937	23.9849	23.638	18	11	23.786	0.189133	0.00795146	Q32MZ4	LRRFIP1	1149	Isoform 2 of Leucine-rich repeat flightless-interacting protein 1 [OS=Homo sapiens]
23.5994	24.0452	23.8469	24.1388	23.8222	23.8306	24	13	23.8805	0.189664	0.00794223	Q96KN2	CNDP1	1150	Beta-Ala-His dipeptidase [OS=Homo sapiens]
19.0254	19.3619	19.2647	19.0781	19.1683	19.4034	16	2	19.217	0.152568	0.00793924	Q9Y3D6	FIS1	1151	mitochondrial fission 1 protein [OS=Homo sapiens]
22.3102	22.573	22.5584	22.4196	22.1562	22.6081	31	6	22.4376	0.177616	0.00791599	P36969	GPX4	1152	Phospholipid hydroperoxide glutathione peroxidase, mitochondrial [OS=Homo sapiens]
26.4939	26.6081	26.2368	26.3896	26.7756	26.7492	51	10	26.5422	0.210051	0.00791386	P07203	GPX1	1153	Glutathione peroxidase 1 [OS=Homo sapiens]
23.7503	23.7636	23.6273	23.9531	24.1183	23.6585	37	8	23.8118	0.188424	0.00791303	P00568	AK1	1154	Adenylate kinase isoenzyme 1 [OS=Homo sapiens]
23.4949	23.4034	23.2721	23.5393	23.8277	23.5677	14	5	23.5175	0.185991	0.00790861	P61978	HNRNPK	1155	Heterogeneous nuclear ribonucleoprotein K [OS=Homo sapiens]
22.8493	22.9992	22.8601	22.8653	23.008	23.3251	16	5	22.9845	0.181526	0.00789774	Q9UN19	DAPP1	1156	Dual adapter for phosphotyrosine and 3-phosphotyrosine and 3-phosphoinositide [OS=Homo sapiens]
24.4483	24.9987	24.6932	24.8852	24.9027	24.7812	32	4	24.7849	0.195638	0.00789344	P26885	FKBP2	1157	Peptidyl-prolyl cis-trans isomerase FKBP2 [OS=Homo sapiens]
20.5902	20.4289	20.4904	20.1638	20.2908	20.532	3	2	20.416	0.1605	0.00786147	P25098	GRK2	1158	Beta-adrenergic receptor kinase 1 [OS=Homo sapiens]
23.6073	23.1854	23.6167	23.4751	23.2268	23.4093	14	9	23.4201	0.183999	0.00785643	O60488	ACSL4	1159	Long-chain-fatty-acid--CoA ligase 4 [OS=Homo sapiens]
20.9659	20.7932	20.9449	20.5912	20.6526	20.9456	0	1	20.8156	0.163497	0.00785455	Q8TF72	SHROOM3	1160	protein Shroom3 [OS=Homo sapiens]
19.7956	19.698	20.0015	19.7927	20.0324	20.0761	1	1	19.8994	0.156249	0.00785194	Q2KHT3	CLEC16A	1161	protein CLEC16A [OS=Homo sapiens]
22.9093	22.6161	22.6591	22.5656	22.4794	22.899	24	10	22.6881	0.17776	0.00783498	O43516	WIPF1	1162	WAS/WASL-interacting protein family member 1 [OS=Homo sapiens]
24.3291	24.7719	24.4157	24.6572	24.7021	24.3641	11	29	24.54	0.192169	0.00783086	P49327	FASN	1163	Fatty acid synthase [OS=Homo sapiens]
21.7813	21.4923	21.5097	21.702	21.9221	21.7947	29	6	21.7003	0.169879	0.00782841	O75396	SEC22B	1164	Vesicle-trafficking protein SEC22b [OS=Homo sapiens]
23.6728	23.9763	23.9548	23.9235	23.6296	23.5574	19	10	23.7857	0.186083	0.00782332	P51606	RENBP	1165	N-acylglucosamine 2-epimerase [OS=Homo sapiens]
23.0866	23.3918	23.3568	23.2462	23.3997	22.9581	12	13	23.2399	0.181763	0.00782117	Q9Y2Q0	ATP8A1	1166	Phospholipid-transporting ATPase IA [OS=Homo sapiens]
27.8268	28.087	28.4226	28.0211	28.1879	27.868	49	19	28.0689	0.219481	0.00781935	Q9UBW5	BIN2	1167	Bridging integrator 2 [OS=Homo sapiens]
22.9783	22.7568	23.0524	22.6392	22.7151	23.0281	4	1	22.8616	0.178714	0.00781718	P08962	CD63	1168	CD63 antigen [OS=Homo sapiens]
23.9252	24.2292	24.2241	23.8942	23.8309	23.8317	18	6	23.9892	0.187462	0.00781443	P40925	MDH1	1169	Malate dehydrogenase, cytoplasmic [OS=Homo sapiens]
21.0075	20.6703	20.808	20.9341	20.5684	20.7852	11	1	20.7956	0.162267	0.00780294	P01700	IGLV1-47	1170	Immunoglobulin lambda variable 1-47 [OS=Homo sapiens]
23.1628	23.3024	23.4974	23.1007	23.0723	23.45	23	5	23.2643	0.181232	0.00779015	O95336	PGLS	1171	6-phosphogluconolactonase [OS=Homo sapiens]
22.2131	22.4833	22.0881	22.4003	22.3508	22.557	14	11	22.3487	0.173487	0.00776272	Q9H2K8	TAOK3	1172	Serine/threonine-protein kinase TAO3 [OS=Homo sapiens]
29.7068	30.1449	29.7622	29.6057	29.5704	29.5032	44	13	29.7156	0.230126	0.00774428	O75636	FCN3	1173	Ficolin-3 [OS=Homo sapiens]
21.8508	21.688	21.6385	21.3732	21.747	21.7837	13	5	21.6802	0.16755	0.00772825	Q53GQ0	HSD17B12	1174	Very-long-chain 3-oxoacyl-CoA reductase [OS=Homo sapiens]
23.4191	23.2671	23.2902	22.9765	23.339	23.5011	16	9	23.2989	0.17997	0.00772442	P35611	ADD1	1175	Alpha-adducin [OS=Homo sapiens]
18.5919	18.8472	18.7906	18.5731	18.476	18.7358	7	1	18.6691	0.143822	0.00770375	Q99627	COPS8	1176	COP9 signalosome complex subunit 8 [OS=Homo sapiens]
21.2778	21.2834	21.5254	21.2689	21.0639	21.4653	11	3	21.3141	0.163954	0.00769227	O94903	PLPBP	1177	Pyridoxal phosphate homeostasis protein [OS=Homo sapiens]
24.0161	23.8451	23.954	23.6728	24.1505	23.7117	4	18	23.8917	0.183746	0.0076908	Q86WI1	PKHD1L1	1178	Fibrocystin-L [OS=Homo sapiens]
23.1821	23.4976	23.5838	23.5193	23.1771	23.4819	33	8	23.407	0.179519	0.00766947	P60842	EIF4A1	1179	Eukaryotic initiation factor 4A-I [OS=Homo sapiens]
23.9695	24.2141	23.973	24.3596	24.2011	23.8856	26	13	24.1005	0.184259	0.00764546	Q14554	PDIA5	1180	Protein disulfide-isomerase A5 [OS=Homo sapiens]
20.3574	20.1369	20.32	20.2277	19.9292	20.1462	13	3	20.1862	0.154283	0.00764299	Q9H479	FN3K	1181	fructosamine-3-kinase [OS=Homo sapiens]
23.806	24.2568	23.9358	24.2672	24.1203	23.9973	24	2	24.0639	0.18388	0.00764132	P06396	GSN	1182	Gelsolin [OS=Homo sapiens]
23.5481	23.7848	23.7821	23.7511	23.7662	23.3425	23	10	23.6625	0.180727	0.00763771	Q99961	SH3GL1	1183	Endophilin-A2 [OS=Homo sapiens]
23.7906	23.5613	23.6212	23.734	23.9572	24.019	18	7	23.7806	0.181001	0.00761129	Q9Y274	ST3GAL6	1184	Type 2 lactosamine alpha-2,3-sialyltransferase [OS=Homo sapiens]
19.7937	19.702	20.0318	20.0035	19.6702	19.8216	2	1	19.8371	0.15088	0.00760592	Q92609	TBC1D5	1185	TBC1 domain family member 5 [OS=Homo sapiens]
23.6492	24.1693	23.7363	23.9513	23.8968	23.9283	22	14	23.8885	0.181594	0.00760174	P34932	HSPA4	1186	Heat shock 70 kDa protein 4 [OS=Homo sapiens]
19.5935	19.8868	19.744	19.5617	19.4988	19.5361	13	7	19.6368	0.148795	0.00757736	Q9Y6G9	DYNC1LI1	1187	Cytoplasmic dynein 1 light intermediate chain 1 [OS=Homo sapiens]
25.5156	25.26	25.3201	25.3472	25.616	25.7547	23	11	25.4689	0.192909	0.00757428	P12081	HARS1	1188	Isoform 2 of Histidine--tRNA ligase, cytoplasmic [OS=Homo sapiens]
21.3039	21.7015	21.2666	21.4493	21.474	21.5677	4	2	21.4605	0.162467	0.00757054	Q14157	UBAP2L	1189	Isoform 2 of Ubiquitin-associated protein 2-like [OS=Homo sapiens]
23.0958	23.3862	23.2956	23.6445	23.3819	23.3671	36	8	23.3618	0.176682	0.00756287	P54819	AK2	1190	Adenylate kinase 2, mitochondrial [OS=Homo sapiens]
24.5022	24.9862	24.9095	25.0273	24.8417	24.9026	18	3	24.8616	0.187888	0.00755735	P01701	IGLV1-51	1191	immunoglobulin lambda variable 1-51 [OS=Homo sapiens]
20.8433	21.0792	20.6371	20.8678	20.813	21.0198	2	1	20.8767	0.157575	0.00754789	Q13107	USP4	1192	Ubiquitin carboxyl-terminal hydrolase 4 [OS=Homo sapiens]
24.5296	24.9878	24.7619	24.9203	24.9045	24.5977	22	9	24.7836	0.186827	0.00753832	Q15019	SEPTIN2	1193	septin-2 [OS=Homo sapiens]
22.8301	23.3041	23.2597	23.2686	23.1899	23.1929	24	8	23.1742	0.174426	0.00752672	Q13561	DCTN2	1194	dynactin subunit 2 [OS=Homo sapiens]
27.4058	26.9126	27.0205	26.8763	26.9234	27.1707	26	16	27.0516	0.203531	0.00752381	Q10567	AP1B1	1195	AP-1 complex subunit beta-1 [OS=Homo sapiens]
23.3011	23.5585	23.5816	23.7174	23.815	23.5099	19	5	23.5806	0.177351	0.00752105	P49755	TMED10	1196	Transmembrane emp24 domain-containing protein 10 [OS=Homo sapiens]
22.9473	22.7732	23.1476	22.8386	22.6891	22.7178	9	14	22.8523	0.17169	0.00751302	P20930	FLG	1197	Filaggrin [OS=Homo sapiens]
22.3187	22.1082	22.328	22.0793	21.8823	22.1444	17	4	22.1435	0.166348	0.00751229	Q9Y3Q8	TSC22D4	1198	TSC22 domain family protein 4 [OS=Homo sapiens]
24.7324	25.0376	24.8474	25.1358	24.6403	24.8109	49	9	24.8674	0.186744	0.00750959	P32119	PRDX2	1199	Peroxiredoxin-2 [OS=Homo sapiens]
25.5001	25.604	25.5963	25.1901	25.1797	25.4031	55	15	25.4122	0.190695	0.00750409	P23284	PPIB	1200	peptidyl-prolyl cis-trans isomerase B [OS=Homo sapiens]
23.7474	23.6853	24.2008	23.8751	23.8533	23.8305	22	11	23.8654	0.179052	0.00750258	O95870	ABHD16A	1201	Protein ABHD16A [OS=Homo sapiens]
25.4909	25.2956	25.3206	25.1967	25.6027	25.0835	30	13	25.3317	0.189762	0.00749108	P01137	TGFB1	1202	Transforming growth factor beta-1 [OS=Homo sapiens]
20.1756	20.37	20.0144	20.404	20.3709	20.2144	3	2	20.2582	0.151445	0.00747572	Q96M96	FGD4	1203	FYVE, RhoGEF and PH domain-containing protein 4 [OS=Homo sapiens]
21.9277	22.2443	22.3602	22.1275	22.2168	21.9774	26	8	22.1423	0.165481	0.00747352	Q02978	SLC25A11	1204	Isoform 2 of Mitochondrial 2-oxoglutarate/malate carrier protein [OS=Homo sapiens]
23.0049	23.0818	22.7767	22.8614	22.71	22.6436	18	6	22.8464	0.170468	0.00746149	Q9H0P0	NT5C3A	1205	Cytosolic 5'-nucleotidase 3A [OS=Homo sapiens]
25.4848	25.335	25.5816	25.2534	25.4295	25.0485	34	5	25.3555	0.188889	0.00744961	P10606	COX5B	1206	Cytochrome c oxidase subunit 5B, mitochondrial [OS=Homo sapiens]
21.4631	21.3305	21.7181	21.7307	21.4725	21.4654	15	12	21.53	0.159624	0.007414	P98194	ATP2C1	1207	Calcium-transporting ATPase type 2C member 1 [OS=Homo sapiens]
24.3013	24.3437	24.3483	24.2923	24.1217	24.6738	40	4	24.3468	0.18036	0.00740797	P00739	HPR	1208	Haptoglobin-related protein [OS=Homo sapiens]
23.7547	23.8574	23.7586	23.7912	24.1454	23.6235	19	24	23.8218	0.1759	0.00738399	Q13464	ROCK1	1209	Rho-associated protein kinase 1 [OS=Homo sapiens]
20.906	21.1366	20.9451	21.2577	21.166	21.2749	0	1	21.1144	0.155905	0.00738382	Q9Y6V0	PCLO	1210	Protein piccolo [OS=Homo sapiens]
22.5793	22.7597	22.451	22.5107	22.7904	22.8612	11	5	22.6587	0.167285	0.00738283	P36507	MAP2K2	1211	Dual specificity mitogen-activated protein kinase kinase 2 [OS=Homo sapiens]
28.0759	27.9311	28.2016	27.9496	28.2844	28.4689	19	19	28.1519	0.207819	0.00738206	O60313	OPA1	1212	Isoform 2 of Dynamin-like 120 kDa protein, mitochondrial [OS=Homo sapiens]
22.0987	21.8148	22.0841	22.2077	21.9225	22.2316	16	6	22.0599	0.1627	0.00737539	P49137	MAPKAPK2	1213	MAP kinase-activated protein kinase 2 [OS=Homo sapiens]
21.7913	21.9066	22.1274	21.8707	22.1183	22.1779	8	8	21.9987	0.161776	0.00735389	Q15042	RAB3GAP1	1214	Rab3 GTPase-activating protein catalytic subunit [OS=Homo sapiens]
21.9625	22.0874	21.9901	22.1039	22.4105	22.1913	19	2	22.1243	0.162697	0.00735377	P60985	KRTDAP	1215	Isoform 2 of Keratinocyte differentiation-associated protein [OS=Homo sapiens]
19.8239	19.9865	19.9616	20.1253	20.2041	19.865	4	1	19.9944	0.147014	0.00735274	P49366	DHPS	1216	Isoform 3 of Deoxyhypusine synthase [OS=Homo sapiens]
25.8693	25.6481	25.8016	25.4148	25.6624	25.4217	49	12	25.6363	0.188435	0.00735031	O00161	SNAP23	1217	Synaptosomal-associated protein 23 [OS=Homo sapiens]
23.3099	23.289	23.2981	23.3983	23.6016	23.687	7	1	23.4306	0.172142	0.00734689	Q9UII2	ATP5IF1	1218	ATPase inhibitor, mitochondrial [OS=Homo sapiens]
24.3987	24.2897	24.2777	24.6133	24.7078	24.5691	27	5	24.4761	0.179594	0.00733753	Q9UMY4	SNX12	1219	Sorting nexin-12 [OS=Homo sapiens]
26.1151	26.1753	26.3002	25.8029	25.8688	25.9687	7	8	26.0385	0.190911	0.00733187	Q9Y4G6	TLN2	1220	Talin-2 [OS=Homo sapiens]
28.7265	28.899	29.2596	28.946	29.2517	28.9324	14	6	29.0025	0.21126	0.00728419	Q6ZVM7	TOM1L2	1221	TOM1-like protein 2 [OS=Homo sapiens]
23.2691	23.3515	22.862	23.1868	23.2377	23.2098	24	14	23.1862	0.168817	0.00728095	P48740	MASP1	1222	Mannan-binding lectin serine protease 1 [OS=Homo sapiens]
21.0914	20.9797	21.1376	20.7761	21.2026	21.1193	18	5	21.0511	0.153236	0.00727924	P29218	IMPA1	1223	Isoform 3 of Inositol monophosphatase 1 [OS=Homo sapiens]
28.5775	29.0103	28.624	28.992	28.9858	28.6484	41	30	28.8063	0.209198	0.00726221	P00488	F13A1	1224	Coagulation factor XIII A chain [OS=Homo sapiens]
21.1309	20.9644	20.8415	20.8191	20.7388	21.0597	31	3	20.9257	0.151624	0.00724581	P14854	COX6B1	1225	Cytochrome c oxidase subunit 6B1 [OS=Homo sapiens]
25.1655	25.3865	25.0889	25.4129	25.1247	25.5345	42	22	25.2855	0.182936	0.00723481	P54577	YARS1	1226	Tyrosine--tRNA ligase, cytoplasmic [OS=Homo sapiens]
24.1211	24.0373	24.3311	24.1579	24.3677	23.9073	42	9	24.1537	0.17471	0.00723327	P21796	VDAC1	1227	voltage-dependent anion-selective channel protein 1 [OS=Homo sapiens]
24.5707	24.8455	24.3959	24.8628	24.6126	24.5949	11	2	24.6471	0.178151	0.00722806	Q7RTS7	KRT74	1228	Keratin, type II cytoskeletal 74 [OS=Homo sapiens]
29.3823	29.2695	29.1956	29.1393	29.165	29.7027	48	31	29.3091	0.211808	0.0072267	Q86UX7	FERMT3	1229	Fermitin family homolog 3 [OS=Homo sapiens]
23.4667	23.8244	23.5695	23.8677	23.7632	23.518	2	5	23.6682	0.170954	0.00722295	O75037	KIF21B	1230	Kinesin-like protein KIF21B [OS=Homo sapiens]
21.9386	21.8638	21.7668	21.8373	21.4895	21.845	15	3	21.7902	0.157241	0.00721614	O43633	CHMP2A	1231	charged multivesicular body protein 2a [OS=Homo sapiens]
21.529	21.802	21.7654	21.7539	21.4104	21.5961	16	5	21.6428	0.156097	0.00721242	Q9UHD1	CHORDC1	1232	cysteine and histidine-rich domain-containing protein 1 [OS=Homo sapiens]
26.1605	26.0677	26.0108	25.7774	25.9281	25.6599	28	6	25.9341	0.186967	0.00720933	P02743	APCS	1233	Serum amyloid P-component [OS=Homo sapiens]
23.975	23.7516	23.7721	23.7852	23.4453	23.7196	18	12	23.7415	0.170698	0.00718987	O95782	AP2A1	1234	AP-2 complex subunit alpha-1 [OS=Homo sapiens]
20.5825	20.8492	20.964	20.654	20.6807	20.6206	1	2	20.7252	0.148841	0.00718167	Q9BX66	SORBS1	1235	Isoform 12 of Sorbin and SH3 domain-containing protein 1 [OS=Homo sapiens]
23.7739	23.7437	23.9084	24.1164	24.1086	24.0908	16	14	23.957	0.171861	0.00717372	Q7L7X3	TAOK1	1236	Serine/threonine-protein kinase TAO1 [OS=Homo sapiens]
20.6643	20.304	20.2677	20.3362	20.4497	20.4691	2	1	20.4152	0.145938	0.00714849	Q8NH72	OR4C6	1237	Olfactory receptor 4C6 [OS=Homo sapiens]
22.9453	23.1518	22.9853	23.1729	22.7276	22.9217	13	6	22.9841	0.164282	0.00714762	Q16610	ECM1	1238	Isoform 4 of Extracellular matrix protein 1 [OS=Homo sapiens]
22.4818	22.6328	22.3937	22.3445	22.2245	22.2126	7	10	22.3816	0.159957	0.00714681	A2RUS2	DENND3	1239	DENN domain-containing protein 3 [OS=Homo sapiens]
24.6921	24.9409	24.5667	24.8881	25.0542	24.7687	6	5	24.8185	0.177312	0.00714437	P13639	EEF2	1240	Elongation factor 2 [OS=Homo sapiens]
25.2143	25.0157	25.0594	24.9332	24.9466	25.3959	32	22	25.0942	0.179178	0.00714023	Q05209	PTPN12	1241	Tyrosine-protein phosphatase non-receptor type 12 [OS=Homo sapiens]
28.6659	28.8218	28.6174	29.1773	28.8613	28.69	43	6	28.8056	0.204847	0.00711135	P0DOX5	#N/A	1242	immunoglobulin gamma-1 heavy chain [OS=Homo sapiens]
24.416	24.8786	24.4175	24.645	24.5805	24.5041	30	16	24.5736	0.174456	0.00709931	P17987	TCP1	1243	T-complex protein 1 subunit alpha [OS=Homo sapiens]
22.9042	22.8548	23.1721	22.784	22.9048	23.1591	23	13	22.9632	0.162962	0.00709667	O15231	ZNF185	1244	Isoform 3 of Zinc finger protein 185 [OS=Homo sapiens]
20.7955	20.991	20.8635	20.8806	20.8158	20.5493	0	1	20.8159	0.147406	0.00708139	Q9NSI6	BRWD1	1245	bromodomain and WD repeat-containing protein 1 [OS=Homo sapiens]
18.5213	18.6328	18.8278	18.4697	18.5317	18.6809	4	1	18.6107	0.131668	0.00707483	Q9UKK9	NUDT5	1246	ADP-sugar pyrophosphatase [OS=Homo sapiens]
22.1175	22.2486	22.1128	22.3789	22.2742	21.932	16	4	22.1773	0.156866	0.00707325	P00746	CFD	1247	Complement factor D [OS=Homo sapiens]
23.9065	24.3976	24.0407	24.1825	24.2073	24.0456	10	27	24.13	0.17053	0.00706711	Q13813	SPTAN1	1248	Spectrin alpha chain, non-erythrocytic 1 [OS=Homo sapiens]
21.3586	21.7358	21.6479	21.5998	21.3861	21.6308	5	3	21.5598	0.152338	0.00706582	Q9H845	ACAD9	1249	Acyl-CoA dehydrogenase family member 9, mitochondrial [OS=Homo sapiens]
24.7708	24.8272	24.698	24.6748	24.4171	24.4282	29	15	24.636	0.173894	0.00705853	Q8N9U0	TC2N	1250	Tandem C2 domains nuclear protein [OS=Homo sapiens]
24.5653	24.7358	24.8407	24.8285	24.6728	25.0759	28	16	24.7865	0.174876	0.0070553	P49368	CCT3	1251	T-complex protein 1 subunit gamma [OS=Homo sapiens]
24.6243	24.4006	24.7142	24.7146	24.6563	24.9399	25	17	24.675	0.174069	0.00705446	Q8TF42	UBASH3B	1252	ubiquitin-associated and SH3 domain-containing protein B [OS=Homo sapiens]
24.1607	24.2885	24.4238	24.0947	23.9617	24.0352	10	3	24.1608	0.17044	0.0070544	Q9Y3A6	TMED5	1253	Transmembrane emp24 domain-containing protein 5 [OS=Homo sapiens]
24.3051	24.7117	24.5809	24.6096	24.5655	24.8222	34	21	24.5992	0.173468	0.00705178	Q06187	BTK	1254	Isoform BTK-C of Tyrosine-protein kinase BTK [OS=Homo sapiens]
25.2547	25.4448	25.3997	25.6768	25.6444	25.2745	49	7	25.4492	0.179291	0.00704506	P09493	TPM1	1255	Isoform 5 of Tropomyosin alpha-1 chain [OS=Homo sapiens]
25.5134	25.1995	25.6602	25.3502	25.2963	25.2285	4	9	25.3747	0.17864	0.00704008	O00507	USP9Y	1256	Probable ubiquitin carboxyl-terminal hydrolase FAF-Y [OS=Homo sapiens]
25.5858	25.6025	25.48	25.4395	25.3258	25.1268	15	10	25.4267	0.178525	0.00702116	O00187	MASP2	1257	Mannan-binding lectin serine protease 2 [OS=Homo sapiens]
20.8348	21.006	21.2442	20.8745	20.9034	20.9629	5	1	20.971	0.147236	0.00702093	P0C025	NUDT17	1258	Nucleoside diphosphate-linked moiety X motif 17 [OS=Homo sapiens]
24.3394	24.0063	24.0676	23.9929	24.237	23.8854	22	11	24.0881	0.168889	0.00701132	P43405	SYK	1259	Tyrosine-protein kinase SYK [OS=Homo sapiens]
23.4921	23.5508	23.2599	23.6462	23.6577	23.7166	3	1	23.5539	0.16495	0.00700309	A6NCD4	CC2D2B	1260	Uncharacterized protein C10orf131 [OS=Homo sapiens]
23.4623	23.4392	23.3806	23.3876	23.8191	23.4585	11	6	23.4912	0.164388	0.00699785	Q9Y251	HPSE	1261	Heparanase [OS=Homo sapiens]
26.2118	26.082	26.2371	25.9151	26.4695	26.181	35	28	26.1828	0.183223	0.00699783	Q0ZGT2	NEXN	1262	Nexilin [OS=Homo sapiens]
21.1499	20.9118	21.3442	21.2512	21.1264	21.231	30	7	21.1691	0.148077	0.00699497	Q9NX63	CHCHD3	1263	MICOS complex subunit MIC19 [OS=Homo sapiens]
26.6528	26.1912	26.5594	26.3629	26.2751	26.5625	45	12	26.434	0.184059	0.00696295	Q13642	FHL1	1264	Isoform 5 of Four and a half LIM domains protein 1 [OS=Homo sapiens]
22.9587	23.1125	23.0264	22.788	22.7053	22.7899	22	7	22.8968	0.15941	0.00696212	Q4G0F5	VPS26B	1265	Vacuolar protein sorting-associated protein 26B [OS=Homo sapiens]
24.3328	24.7605	24.4081	24.6619	24.6628	24.6786	29	24	24.5841	0.171128	0.0069609	P11586	MTHFD1	1266	C-1-tetrahydrofolate synthase, cytoplasmic [OS=Homo sapiens]
20.3066	20.1107	20.4301	20.1389	20.4234	20.3716	16	5	20.2969	0.14075	0.00693457	Q9Y6I9	TEX264	1267	Testis-expressed protein 264 [OS=Homo sapiens]
20.5343	20.4305	20.2567	20.643	20.5258	20.6215	16	1	20.502	0.142159	0.00693394	Q5VTU8	ATP5F1EP2	1268	ATP synthase subunit epsilon-like protein, mitochondrial [OS=Homo sapiens]
24.7945	24.4504	24.8746	24.8846	24.917	24.7804	2	20	24.7836	0.171705	0.00692816	Q8WXH0	SYNE2	1269	Nesprin-2 [OS=Homo sapiens]
22.1717	22.2751	21.9626	22.4332	22.2419	22.2402	20	4	22.2208	0.153589	0.00691196	P10301	RRAS	1270	Ras-related protein R-Ras [OS=Homo sapiens]
21.5884	21.7834	21.4057	21.4802	21.5636	21.3747	2	1	21.5326	0.148831	0.00691188	Q9BUH8	BEGAIN	1271	Brain-enriched guanylate kinase-associated protein [OS=Homo sapiens]
28.4195	28.5207	28.5933	28.4735	28.0969	28.6559	54	4	28.4599	0.19671	0.0069118	P24844	MYL9	1272	Myosin regulatory light polypeptide 9 [OS=Homo sapiens]
26.1725	25.7615	26.0333	25.822	25.9777	26.2038	28	4	25.9951	0.179605	0.00690918	P61769	B2M	1273	Beta-2-microglobulin [OS=Homo sapiens]
25.4903	25.4911	25.4286	25.6989	25.9031	25.6422	33	6	25.609	0.176763	0.00690238	P12236	SLC25A6	1274	ADP/ATP translocase 3 [OS=Homo sapiens]
23.1274	23.0648	23.0971	23.3894	23.4081	23.0778	18	10	23.1941	0.160019	0.00689911	P34897	SHMT2	1275	Serine hydroxymethyltransferase, mitochondrial [OS=Homo sapiens]
23.736	23.7207	23.9202	23.6461	23.4162	23.6696	36	6	23.6848	0.163221	0.00689139	Q13637	RAB32	1276	Ras-related protein Rab-32 [OS=Homo sapiens]
21.64	21.7901	21.7988	21.6691	21.7541	21.4025	9	6	21.6758	0.148544	0.00685299	P08174	CD55	1277	Isoform 7 of Complement decay-accelerating factor [OS=Homo sapiens]
20.8769	21.1282	21.0193	20.9653	20.7766	20.7641	10	6	20.9217	0.142829	0.0068268	Q5T0N5	FNBP1L	1278	Isoform 4 of Formin-binding protein 1-like [OS=Homo sapiens]
25.2463	25.7015	25.4853	25.6609	25.4656	25.3595	7	1	25.4865	0.173723	0.00681627	P60673	PFN3	1279	Profilin-3 [OS=Homo sapiens]
23.0045	23.1215	22.7062	23.0287	22.8281	23.0481	3	11	22.9562	0.156379	0.00681207	Q709C8	VPS13C	1280	Isoform 4 of Vacuolar protein sorting-associated protein 13C [OS=Homo sapiens]
21.4481	21.292	21.5689	21.4223	21.2556	21.6235	4	12	21.4351	0.145877	0.00680551	P78559	MAP1A	1281	Microtubule-associated protein 1A [OS=Homo sapiens]
27.2934	27.642	27.3283	27.2648	27.3988	27.699	28	19	27.4377	0.186669	0.00680338	Q9ULV4	CORO1C	1282	Isoform 3 of Coronin-1C [OS=Homo sapiens]
23.0495	22.8057	23.0209	22.7914	23.1007	23.1691	17	2	22.9895	0.156374	0.00680197	P01111	NRAS	1283	GTPase NRas [OS=Homo sapiens]
24.1909	24.6638	24.2967	24.518	24.4405	24.3992	34	10	24.4182	0.165888	0.00679362	Q9P126	CLEC1B	1284	C-type lectin domain family 1 member B [OS=Homo sapiens]
23.6863	23.6463	23.5213	23.8502	23.5781	23.9394	26	7	23.7036	0.161025	0.00679327	Q96AP7	ESAM	1285	Endothelial cell-selective adhesion molecule [OS=Homo sapiens]
22.9567	23.1364	23.1544	22.9552	22.9194	22.7306	41	5	22.9754	0.156073	0.00679305	P61225	RAP2B	1286	ras-related protein Rap-2b [OS=Homo sapiens]
20.0479	20.2522	20.2519	20.0326	19.9818	19.9359	3	1	20.0837	0.136242	0.00678372	Q9Y2S2	CRYL1	1287	Lambda-crystallin homolog [OS=Homo sapiens]
22.1528	22.2499	22.0404	22.1819	21.9302	21.8707	7	7	22.071	0.149574	0.00677694	O94804	STK10	1288	Serine/threonine-protein kinase 10 [OS=Homo sapiens]
23.671	23.8816	23.6402	23.8778	23.4964	23.5635	2	19	23.6884	0.160169	0.00676147	Q5VST9	OBSCN	1289	Isoform 5 of Obscurin [OS=Homo sapiens]
23.1738	23.2534	23.2809	23.4114	22.9813	23.3862	11	11	23.2478	0.157187	0.00676138	O43747	AP1G1	1290	AP-1 complex subunit gamma-1 [OS=Homo sapiens]
23.5212	23.5235	23.7994	23.7851	23.6973	23.4144	20	15	23.6235	0.15919	0.00673865	Q9BX10	GTPBP2	1291	GTP-binding protein 2 [OS=Homo sapiens]
22.4697	22.6989	22.719	22.5952	22.3266	22.4731	28	5	22.5471	0.151648	0.00672583	P20618	PSMB1	1292	proteasome subunit beta type-1 [OS=Homo sapiens]
24.4412	24.4092	24.4832	24.7548	24.7413	24.7307	19	11	24.5934	0.164913	0.00670558	O94826	TOMM70	1293	Mitochondrial import receptor subunit TOM70 [OS=Homo sapiens]
23.0934	22.9832	23.1808	23.1387	23.2861	22.8469	49	1	23.0882	0.154628	0.00669728	P09493	TPM1	1294	Isoform 3 of Tropomyosin alpha-1 chain [OS=Homo sapiens]
18.9868	18.7601	18.919	19.1159	19.0535	18.8866	0	1	18.9536	0.126934	0.00669711	Q8TCU4	ALMS1	1295	Alstrom syndrome protein 1 [OS=Homo sapiens]
23.7511	23.9097	23.4268	23.6294	23.6897	23.689	51	9	23.6826	0.157875	0.00666627	P28066	PSMA5	1296	Proteasome subunit alpha type-5 [OS=Homo sapiens]
20.3082	20.1993	20.4285	20.1526	20.0369	20.1928	7	1	20.2197	0.134536	0.0066537	Q9NX14	NDUFB11	1297	NADH dehydrogenase [ubiquinone] 1 beta subcomplex subunit 11, mitochondrial [OS=Homo sapiens]
21.497	21.4389	21.7455	21.7432	21.7035	21.4808	29	5	21.6015	0.143631	0.00664911	Q13442	PDAP1	1298	28 kDa heat- and acid-stable phosphoprotein [OS=Homo sapiens]
22.8917	23.0217	23.1969	23.1919	23.1993	23.3214	10	7	23.1372	0.153603	0.00663879	Q8IY22	CMIP	1299	C-Maf-inducing protein [OS=Homo sapiens]
25.7626	26.0719	26.1068	26.0633	26.0641	25.7281	41	4	25.9661	0.172101	0.0066279	P37840	SNCA	1300	Alpha-synuclein [OS=Homo sapiens]
22.9657	23.1274	23.3043	23.0272	22.8681	22.9787	48	3	23.0452	0.152532	0.00661883	P67936	TPM4	1301	Isoform 2 of Tropomyosin alpha-4 chain [OS=Homo sapiens]
24.6461	24.9273	24.643	25.0441	24.9082	24.9069	39	9	24.8459	0.164082	0.00660397	O00139	KIF2A	1302	Isoform 2 of Kinesin-like protein KIF2A [OS=Homo sapiens]
24.0052	23.814	23.9843	24.1015	23.8156	24.2159	27	9	23.9894	0.158195	0.00659438	P04217	A1BG	1303	Alpha-1B-glycoprotein [OS=Homo sapiens]
25.8389	25.8535	25.8601	26.2069	25.7046	25.9731	46	10	25.9062	0.170268	0.00657249	Q9Y624	F11R	1304	Junctional adhesion molecule A [OS=Homo sapiens]
22.3029	22.4901	22.1612	22.119	22.1654	22.3787	4	3	22.2696	0.14622	0.00656593	Q9NQ79	CRTAC1	1305	cartilage acidic protein 1 [OS=Homo sapiens]
25.5661	26.0316	25.9684	25.9942	25.9441	25.8922	29	15	25.8994	0.169945	0.00656171	P40227	CCT6A	1306	T-complex protein 1 subunit zeta [OS=Homo sapiens]
19.4848	19.3158	19.3006	19.1648	19.1686	19.399	1	1	19.3056	0.126141	0.00653388	P47712	PLA2G4A	1307	Cytosolic phospholipase A2 [OS=Homo sapiens]
21.4782	21.6836	21.5333	21.2485	21.4597	21.484	6	2	21.4812	0.140233	0.00652815	Q96QR8	PURB	1308	Transcriptional activator protein Pur-beta [OS=Homo sapiens]
24.0209	24.1516	24.1894	24.118	24.0161	23.7554	23	19	24.0419	0.156691	0.00651741	P35606	COPB2	1309	Coatomer subunit beta' [OS=Homo sapiens]
25.7862	26.0539	26.009	26.1665	26.0815	25.7467	39	8	25.974	0.169174	0.00651322	O00299	CLIC1	1310	chloride intracellular channel protein 1 [OS=Homo sapiens]
25.8484	26.3615	26.0552	26.1301	26.0586	25.9951	32	2	26.0748	0.169404	0.00649684	P0DOX8	#N/A	1311	Immunoglobulin lambda-1 light chain [OS=Homo sapiens]
21.0796	21.1798	21.4881	21.3091	21.2824	21.2223	57	8	21.2602	0.138078	0.00649466	Q9UKY7	CDV3	1312	Protein CDV3 homolog [OS=Homo sapiens]
27.8878	28.2861	28.2355	28.3923	28.3756	28.2484	35	13	28.2376	0.183228	0.00648879	Q15404	RSU1	1313	Ras suppressor protein 1 [OS=Homo sapiens]
23.7418	23.9888	23.6764	24.0006	23.8449	23.6439	45	3	23.8161	0.154527	0.00648834	Q9BQE3	TUBA1C	1314	Tubulin alpha-1C chain [OS=Homo sapiens]
23.0551	23.2551	23.1295	22.9311	23.1999	22.8753	29	6	23.0743	0.149649	0.00648552	P30626	SRI	1315	Sorcin [OS=Homo sapiens]
20.9724	21.1352	21.2412	21.3254	21.2569	21.3352	10	6	21.2111	0.137253	0.00647083	O43312	MTSS1	1316	Metastasis suppressor protein 1 [OS=Homo sapiens]
26.9861	26.7889	26.9612	27.0343	27.2286	27.2527	33	18	27.042	0.174913	0.0064682	Q16851	UGP2	1317	UTP--glucose-1-phosphate uridylyltransferase [OS=Homo sapiens]
28.4365	28.3272	28.1388	28.491	28.5219	28.0921	44	20	28.3346	0.182831	0.00645256	P01009	SERPINA1	1318	alpha-1-antitrypsin [OS=Homo sapiens]
24.5104	24.4002	24.4193	24.4157	24.3533	24.7857	2	10	24.4808	0.157854	0.00644808	Q63HN8	RNF213	1319	E3 ubiquitin-protein ligase RNF213 [OS=Homo sapiens]
20.9603	21.0665	20.7809	20.7125	20.911	20.7757	13	4	20.8678	0.134218	0.00643181	Q9NUJ1	ABHD10	1320	Mycophenolic acid acyl-glucuronide esterase, mitochondrial [OS=Homo sapiens]
21.8284	21.8174	21.9685	21.6613	21.6216	21.6277	12	4	21.7542	0.139724	0.00642287	O43772	SLC25A20	1321	mitochondrial carnitine/acylcarnitine carrier protein [OS=Homo sapiens]
22.1523	22.3085	22.2383	22.0665	22.164	21.9018	8	6	22.1386	0.14206	0.00641687	P15498	VAV1	1322	Proto-oncogene vav [OS=Homo sapiens]
23.4074	23.3807	23.4645	23.6723	23.5813	23.2504	21	5	23.4594	0.150204	0.0064027	Q9H7M9	VSIR	1323	V-type immunoglobulin domain-containing suppressor of T-cell activation [OS=Homo sapiens]
24.3171	24.4155	24.3604	24.0342	24.1648	24.0932	19	5	24.2308	0.155101	0.00640099	Q969T9	WBP2	1324	WW domain-binding protein 2 [OS=Homo sapiens]
22.8325	23.0777	23.0082	23.125	22.7408	22.9496	5	6	22.9557	0.146774	0.00639379	P16885	PLCG2	1325	1-phosphatidylinositol 4,5-bisphosphate phosphodiesterase gamma-2 [OS=Homo sapiens]
22.131	22.2461	22.224	22.4272	22.2597	22.0023	10	4	22.215	0.141706	0.00637885	Q96G23	CERS2	1326	Ceramide synthase 2 [OS=Homo sapiens]
20.1406	20.1601	19.8459	20.0466	20.0147	19.8933	1	1	20.0169	0.127446	0.00636692	Q96NL6	SCLT1	1327	Sodium channel and clathrin linker 1 [OS=Homo sapiens]
25.9312	25.8815	26.0133	26.266	26.2726	26.0897	19	12	26.0757	0.165942	0.00636383	Q9ULC5	ACSL5	1328	Long-chain-fatty-acid--CoA ligase 5 [OS=Homo sapiens]
21.4062	21.3252	21.3111	21.6128	21.6135	21.515	1	1	21.464	0.136445	0.00635693	Q5T5U3	ARHGAP21	1329	rho GTPase-activating protein 21 [OS=Homo sapiens]
30.2047	30.1991	30.3824	30.4333	30.3913	29.9198	42	20	30.2551	0.192153	0.00635108	P06396	GSN	1330	Isoform 2 of Gelsolin [OS=Homo sapiens]
21.7186	21.5503	21.5171	21.5223	21.7687	21.8284	15	4	21.6509	0.137493	0.00635044	P09486	SPARC	1331	Sparc [OS=Homo sapiens]
23.6988	23.9973	23.8284	23.7736	23.5942	23.6132	19	13	23.7509	0.150609	0.0063412	P38606	ATP6V1A	1332	V-type proton ATPase catalytic subunit A [OS=Homo sapiens]
24.9817	25.1865	25.3257	25.3092	25.3238	25.0071	34	14	25.189	0.15963	0.0063373	P37837	TALDO1	1333	Transaldolase [OS=Homo sapiens]
23.1276	23.2998	22.8861	23.2247	23.2278	23.0905	24	4	23.1428	0.1466	0.0063346	P61088	UBE2N	1334	ubiquitin-conjugating enzyme E2 N [OS=Homo sapiens]
28.8306	28.2851	28.6214	28.4971	28.4741	28.5087	59	14	28.5362	0.180618	0.00632945	P02533	KRT14	1335	Keratin, type I cytoskeletal 14 [OS=Homo sapiens]
23.7954	23.6166	23.5252	23.6925	23.4993	23.8772	21	14	23.6677	0.149736	0.0063266	P40763	STAT3	1336	Signal transducer and activator of transcription 3 [OS=Homo sapiens]
24.6468	24.7084	24.7022	24.7696	24.9093	25.062	32	3	24.7997	0.156805	0.00632285	Q9H299	SH3BGRL3	1337	SH3 domain-binding glutamic acid-rich-like protein 3 [OS=Homo sapiens]
22.6057	22.2482	22.2419	22.3764	22.2421	22.3332	12	9	22.3412	0.141141	0.00631751	P35612	ADD2	1338	Beta-adducin [OS=Homo sapiens]
22.2574	22.3429	22.4134	22.042	22.1826	22.1119	30	5	22.225	0.140381	0.00631636	Q04837	SSBP1	1339	Single-stranded DNA-binding protein, mitochondrial [OS=Homo sapiens]
26.1016	25.9381	25.9198	25.9428	25.6012	25.9164	20	13	25.9033	0.163574	0.00631477	Q13976	PRKG1	1340	Isoform Beta of cGMP-dependent protein kinase 1 [OS=Homo sapiens]
23.3733	23.7883	23.4675	23.4619	23.4124	23.4736	16	19	23.4962	0.148309	0.00631206	Q9Y2A7	NCKAP1	1341	Nck-associated protein 1 [OS=Homo sapiens]
24.8107	24.7929	24.8764	25.0553	25.1986	24.9844	27	12	24.953	0.15716	0.00629824	Q96PD5	PGLYRP2	1342	N-acetylmuramoyl-L-alanine amidase [OS=Homo sapiens]
24.8894	24.6562	24.8418	24.9944	25.0001	24.6486	15	9	24.8385	0.156403	0.00629683	Q9NUY8	TBC1D23	1343	TBC1 domain family member 23 [OS=Homo sapiens]
23.9591	23.7913	23.9517	23.8255	23.8631	24.2079	10	12	23.9331	0.150427	0.00628531	O94979	SEC31A	1344	Protein transport protein Sec31A [OS=Homo sapiens]
22.9469	22.855	22.7674	22.553	22.7744	22.923	20	9	22.8033	0.143122	0.0062764	Q96KP4	CNDP2	1345	cytosolic non-specific dipeptidase [OS=Homo sapiens]
25.4242	25.6392	25.5504	25.5183	25.3544	25.1907	32	5	25.4462	0.159704	0.00627616	P04792	HSPB1	1346	Heat shock protein beta-1 [OS=Homo sapiens]
23.9938	24.3778	24.2253	24.035	24.1825	24.011	37	11	24.1376	0.151398	0.00627231	P54920	NAPA	1347	alpha-soluble nsf attachment protein [OS=Homo sapiens]
21.7787	21.6703	21.4371	21.6511	21.8183	21.6035	21	4	21.6598	0.135806	0.00626994	P20674	COX5A	1348	Cytochrome c oxidase subunit 5A, mitochondrial [OS=Homo sapiens]
23.641	23.6276	23.4112	23.3948	23.5969	23.7796	41	9	23.5752	0.147515	0.00625723	Q9BUL8	PDCD10	1349	programmed cell death protein 10 [OS=Homo sapiens]
23.4597	23.3902	23.3927	23.6653	23.6615	23.7062	1	1	23.5459	0.1473	0.00625587	Q9P2P1	NYNRIN	1350	Protein NYNRIN [OS=Homo sapiens]
23.1441	22.9019	23.0663	23.1688	23.1395	23.3445	24	7	23.1275	0.144121	0.00623157	Q9NVA2	SEPTIN11	1351	Septin-11 [OS=Homo sapiens]
27.8371	27.6235	27.6944	27.9032	28.0945	27.9562	29	3	27.8515	0.172946	0.00620957	Q86YW5	TREML1	1352	Trem-like transcript 1 protein [OS=Homo sapiens]
25.5007	25.5901	25.4899	25.5752	25.2895	25.2054	42	16	25.4418	0.157902	0.00620639	Q9Y608	LRRFIP2	1353	Isoform 4 of Leucine-rich repeat flightless-interacting protein 2 [OS=Homo sapiens]
23.7398	23.5397	23.796	23.8404	23.9154	23.9485	51	4	23.7966	0.147197	0.00618561	P15531	NME1	1354	Nucleoside diphosphate kinase A [OS=Homo sapiens]
20.2732	20.4928	20.3957	20.3398	20.4883	20.1714	16	5	20.3602	0.125612	0.00616949	O00743	PPP6C	1355	Serine/threonine-protein phosphatase 6 catalytic subunit [OS=Homo sapiens]
25.255	25.3964	25.3428	25.4146	25.6086	25.1481	26	25	25.3609	0.156411	0.0061674	Q14697	GANAB	1356	Neutral alpha-glucosidase AB [OS=Homo sapiens]
23.4047	23.2232	23.3985	23.4518	23.6662	23.4963	20	14	23.4401	0.144529	0.00616587	A0FGR8	ESYT2	1357	Extended synaptotagmin-2 [OS=Homo sapiens]
19.5569	19.8023	19.8284	19.6725	19.8443	19.6157	7	5	19.72	0.121402	0.00615629	Q17RC7	EXOC3L4	1358	Exocyst complex component 3-like protein 4 [OS=Homo sapiens]
22.0574	21.9706	22.1059	21.97	21.7157	21.9885	21	2	21.968	0.134975	0.00614414	Q14203	DCTN1	1359	Dynactin subunit 1 [OS=Homo sapiens]
19.998	19.9646	20.0356	20.1552	20.1734	20.2866	1	1	20.1022	0.12337	0.00613714	O14917	PCDH17	1360	Protocadherin-17 [OS=Homo sapiens]
23.7327	23.7422	23.6039	23.745	23.7648	23.3926	18	14	23.6636	0.144785	0.00611847	Q06033	ITIH3	1361	Inter-alpha-trypsin inhibitor heavy chain H3 [OS=Homo sapiens]
22.3172	22.1208	22.0736	22.264	22.2553	22.4493	13	3	22.2467	0.1358	0.00610427	P28070	PSMB4	1362	Proteasome subunit beta type-4 [OS=Homo sapiens]
26.0063	26.0589	26.0635	25.9099	25.6562	26.0486	32	3	25.9572	0.158275	0.00609754	O00483	NDUFA4	1363	Cytochrome c oxidase subunit NDUFA4 [OS=Homo sapiens]
24.1479	23.9513	24.0912	24.1185	24.3952	24.2151	16	6	24.1532	0.147146	0.00609217	Q9UNS2	COPS3	1364	COP9 signalosome complex subunit 3 [OS=Homo sapiens]
20.9413	21.2648	21.0692	21.0144	21.1234	20.9187	8	1	21.0553	0.128122	0.00608504	P17096	HMGA1	1365	High mobility group protein HMG-I/HMG-Y [OS=Homo sapiens]
23.5303	23.4102	23.7236	23.4469	23.4451	23.2997	29	15	23.476	0.142439	0.00606743	P00367	GLUD1	1366	Glutamate dehydrogenase 1, mitochondrial [OS=Homo sapiens]
23.7604	23.5647	23.7071	23.9574	23.8593	23.6382	27	14	23.7478	0.144024	0.0060647	P36957	DLST	1367	Dihydrolipoyllysine-residue succinyltransferase component of 2-oxoglutarate dehydrogenase complex, mitochondrial [OS=Homo sapiens]
25.9624	26.3281	26.1209	26.3458	26.0723	26.0325	30	6	26.1437	0.158529	0.00606375	P04179	SOD2	1368	Superoxide dismutase [Mn], mitochondrial [OS=Homo sapiens]
28.3849	27.9759	28.0858	28.2861	28.2046	28.4125	50	3	28.225	0.171073	0.00606107	P0DOX7	#N/A	1369	immunoglobulin kappa light chain [OS=Homo sapiens]
18.4162	18.3433	18.2535	18.2341	18.1948	18.1034	5	3	18.2576	0.110248	0.00603847	Q9NVE7	PANK4	1370	pantothenate kinase 4 [OS=Homo sapiens]
24.682	24.6719	24.8379	24.475	24.4457	24.5451	10	2	24.6096	0.148595	0.0060381	P00414	MT-CO3	1371	Cytochrome c oxidase subunit 3 [OS=Homo sapiens]
23.1905	23.1636	23.1832	23.2417	23.0608	23.479	17	7	23.2198	0.140202	0.00603802	Q96AG4	LRRC59	1372	Leucine-rich repeat-containing protein 59 [OS=Homo sapiens]
24.1263	24.2005	24.0262	23.7911	23.96	23.9502	22	1	24.009	0.14427	0.006009	O43852	CALU	1373	Isoform 4 of Calumenin [OS=Homo sapiens]
21.7599	21.6859	21.6714	21.8447	22.0255	21.842	14	8	21.8049	0.130868	0.00600177	P43155	CRAT	1374	Carnitine O-acetyltransferase [OS=Homo sapiens]
23.8675	24.1055	24.0406	24.2097	23.9943	23.8289	19	12	24.0077	0.143703	0.00598571	P23368	ME2	1375	NAD-dependent malic enzyme, mitochondrial [OS=Homo sapiens]
22.1349	22.5229	22.4368	22.3363	22.4104	22.3039	13	2	22.3575	0.133627	0.00597683	P55209	NAP1L1	1376	Nucleosome assembly protein 1-like 1 [OS=Homo sapiens]
25.9352	26.2012	26.1738	26.2115	26.3831	26.0282	38	5	26.1555	0.15625	0.00597388	P02775	PPBP	1377	Platelet basic protein [OS=Homo sapiens]
22.5335	22.4156	22.5206	22.307	22.6161	22.6767	14	11	22.5116	0.134027	0.00595368	P41250	GARS1	1378	Glycine--tRNA ligase [OS=Homo sapiens]
25.1236	25.1159	25.4054	25.0422	24.9704	25.1886	15	2	25.141	0.14966	0.00595283	Q96DZ9	CMTM5	1379	Isoform 2 of CKLF-like MARVEL transmembrane domain-containing protein 5 [OS=Homo sapiens]
23.6971	24.0781	23.9773	23.7858	23.8993	23.9964	28	8	23.9057	0.142153	0.00594643	P30042	GATD3A	1380	ES1 protein homolog, mitochondrial [OS=Homo sapiens]
27.0725	27.3533	27.1444	26.9671	26.8882	27.0571	3	2	27.0804	0.160591	0.00593016	P27987	ITPKB	1381	inositol-trisphosphate 3-kinase B [OS=Homo sapiens]
23.9666	24.3795	24.2517	24.0701	24.1935	24.1786	4	6	24.1733	0.143159	0.00592218	Q9NQC3	RTN4	1382	Reticulon-4 [OS=Homo sapiens]
24.8053	24.961	24.8538	25.0409	24.9756	24.6337	30	8	24.8784	0.147297	0.00592067	P51572	BCAP31	1383	B-cell receptor-associated protein 31 [OS=Homo sapiens]
23.9841	24.1646	24.2006	24.2749	24.1473	23.8959	34	6	24.1112	0.142445	0.00590784	P05141	SLC25A5	1384	ADP/ATP translocase 2 [OS=Homo sapiens]
21.8568	22.2057	22.1131	21.9006	22.0113	22.042	27	11	22.0216	0.130075	0.00590671	Q8NG06	TRIM58	1385	E3 ubiquitin-protein ligase TRIM58 [OS=Homo sapiens]
25.6154	25.8654	25.4781	25.7518	25.6244	25.4842	30	10	25.6366	0.15137	0.00590445	P02760	AMBP	1386	Protein AMBP [OS=Homo sapiens]
24.9593	25.2728	25.1985	25.1888	25.0234	24.9081	15	30	25.0918	0.148001	0.00589837	Q15746	MYLK	1387	Isoform 3B of Myosin light chain kinase, smooth muscle [OS=Homo sapiens]
22.1319	21.8732	22.2009	22.0117	21.9555	21.9038	22	3	22.0128	0.129794	0.00589631	P20338	RAB4A	1388	Ras-related protein Rab-4A [OS=Homo sapiens]
22.4092	22.299	22.3866	22.1656	22.2592	22.0664	25	9	22.2643	0.131204	0.00589303	P22234	PAICS	1389	multifunctional protein ADE2 [OS=Homo sapiens]
23.7224	23.7294	24.039	23.6871	23.6555	23.7935	22	16	23.7711	0.139148	0.00585367	P33176	KIF5B	1390	Kinesin-1 heavy chain [OS=Homo sapiens]
23.529	23.2885	23.686	23.4325	23.4282	23.5713	19	18	23.4893	0.137308	0.00584558	O60229	KALRN	1391	Isoform 6 of Kalirin [OS=Homo sapiens]
18.9717	18.9686	19.2278	19.1221	19.1678	19.1866	4	2	19.1074	0.111638	0.00584267	Q9C0E8	LNPK	1392	Protein lunapark [OS=Homo sapiens]
24.2781	24.4468	24.3821	24.6006	24.6123	24.6185	32	10	24.4897	0.142904	0.00583528	Q99426	TBCB	1393	tubulin-folding cofactor B [OS=Homo sapiens]
25.3894	25.565	25.4376	25.6166	25.5516	25.2141	35	3	25.4624	0.148214	0.00582089	A0A075B6K4	IGLV3-10	1394	immunoglobulin lambda variable 3-10 [OS=Homo sapiens]
20.6607	20.9225	20.7717	20.6963	20.5649	20.6896	8	1	20.7176	0.120585	0.00582039	P07919	UQCRH	1395	Cytochrome b-c1 complex subunit 6, mitochondrial [OS=Homo sapiens]
20.9576	21.1127	21.2551	21.1271	21.2441	21.2847	10	3	21.1636	0.123179	0.00582032	Q86UF1	TSPAN33	1396	Tetraspanin-33 [OS=Homo sapiens]
27.0309	26.9876	26.9202	27.2492	27.0984	27.3278	12	10	27.1024	0.157389	0.00580721	Q8NDB2	BANK1	1397	Isoform 2 of B-cell scaffold protein with ankyrin repeats [OS=Homo sapiens]
25.2246	25.2862	25.3195	25.4474	25.411	25.0384	13	6	25.2879	0.14684	0.00580676	P01019	AGT	1398	Angiotensinogen [OS=Homo sapiens]
21.5426	21.3539	21.3013	21.6081	21.5007	21.5746	25	3	21.4802	0.124543	0.00579804	O43169	CYB5B	1399	Cytochrome b5 type B [OS=Homo sapiens]
25.4726	25.5285	25.4113	25.1372	25.3741	25.2401	44	8	25.3606	0.146914	0.00579299	P09211	GSTP1	1400	Glutathione S-transferase P [OS=Homo sapiens]
25.4693	25.7448	25.746	25.7649	25.5544	25.4454	18	7	25.6208	0.148268	0.00578701	Q9UHQ9	CYB5R1	1401	NADH-cytochrome b5 reductase 1 [OS=Homo sapiens]
20.9742	20.993	21.0277	20.9832	21.2549	20.8994	3	1	21.0221	0.121591	0.00578396	Q9Y3E7	CHMP3	1402	Charged multivesicular body protein 3 [OS=Homo sapiens]
27.2047	27.4696	27.4764	27.4623	27.3788	27.1051	15	6	27.3495	0.157989	0.00577668	P21926	CD9	1403	CD9 antigen [OS=Homo sapiens]
23.2837	23.6116	23.2967	23.5163	23.3076	23.4148	27	9	23.4051	0.135001	0.005768	Q9BXS5	AP1M1	1404	AP-1 complex subunit mu-1 [OS=Homo sapiens]
24.7679	24.968	24.6696	24.9568	25.0059	24.7325	32	14	24.8501	0.143329	0.00576774	P14868	DARS1	1405	Aspartate--tRNA ligase, cytoplasmic [OS=Homo sapiens]
20.682	20.5159	20.8466	20.6983	20.8002	20.7933	8	3	20.7227	0.119463	0.00576482	Q15738	NSDHL	1406	sterol-4-alpha-carboxylate 3-dehydrogenase, decarboxylating [OS=Homo sapiens]
28.6575	28.5382	28.669	28.3034	28.3419	28.3637	2	4	28.4789	0.163943	0.00575664	Q8N3C0	ASCC3	1407	Activating signal cointegrator 1 complex subunit 3 [OS=Homo sapiens]
23.096	23.3116	23.3176	23.3254	23.3877	23.0698	17	7	23.2513	0.133562	0.00574427	Q9NR46	SH3GLB2	1408	Endophilin-B2 [OS=Homo sapiens]
22.4406	22.2252	22.1566	22.4336	22.1846	22.2096	3	1	22.275	0.127672	0.00573162	Q9NZN8	CNOT2	1409	CCR4-NOT transcription complex subunit 2 [OS=Homo sapiens]
26.7566	27.2144	26.9897	26.9955	26.898	26.8738	14	7	26.9547	0.154494	0.00573162	P16671	CD36	1410	Platelet glycoprotein 4 [OS=Homo sapiens]
24.8077	24.8748	24.7326	24.7738	25.1282	24.8039	51	6	24.8535	0.14244	0.00573117	P05109	S100A8	1411	Protein S100-A8 [OS=Homo sapiens]
24.6137	24.288	24.5334	24.5509	24.3756	24.2995	6	9	24.4435	0.14006	0.00572995	Q5T5C0	STXBP5	1412	Syntaxin-binding protein 5 [OS=Homo sapiens]
23.2596	23.0628	23.0705	22.9582	23.2375	22.9555	25	3	23.0907	0.131971	0.00571534	P13987	CD59	1413	CD59 glycoprotein [OS=Homo sapiens]
19.5927	19.4652	19.2904	19.5714	19.4935	19.5522	8	1	19.4942	0.110791	0.00568327	O95167	NDUFA3	1414	NADH dehydrogenase [ubiquinone] 1 alpha subcomplex subunit 3 [OS=Homo sapiens]
26.5262	26.5261	26.4934	26.5863	26.8353	26.8036	27	6	26.6285	0.151258	0.00568031	P30084	ECHS1	1415	Enoyl-CoA hydratase, mitochondrial [OS=Homo sapiens]
21.5835	21.4007	21.4013	21.343	21.2247	21.4769	22	4	21.405	0.121163	0.0056605	Q86YL5	TDRP	1416	Testis development-related protein [OS=Homo sapiens]
25.9827	26.2128	25.993	26.1964	25.8372	25.9487	31	15	26.0285	0.14731	0.00565957	P02790	HPX	1417	Hemopexin [OS=Homo sapiens]
19.2514	19.3608	19.1025	19.3875	19.1823	19.3073	26	1	19.2653	0.109008	0.00565825	P07948	LYN	1418	Tyrosine-protein kinase Lyn [OS=Homo sapiens]
27.5554	27.5784	27.2883	27.717	27.6707	27.4504	62	11	27.5434	0.155836	0.00565783	P62258	YWHAE	1419	14-3-3 protein epsilon [OS=Homo sapiens]
21.1527	21.3896	21.1582	21.3227	21.2432	21.0671	11	5	21.2223	0.119619	0.00563651	Q8N490	PNKD	1420	Isoform 3 of Probable hydrolase PNKD [OS=Homo sapiens]
25.767	25.9009	25.5607	25.8391	25.7681	25.5501	34	9	25.731	0.144891	0.00563098	P08238	HSP90AB1	1421	Heat shock protein HSP 90-beta [OS=Homo sapiens]
23.9303	24.1063	23.9852	23.8384	24.0013	23.7231	24	14	23.9308	0.134485	0.00561976	Q16799	RTN1	1422	Reticulon-1 [OS=Homo sapiens]
22.6659	22.5959	22.4933	22.4297	22.787	22.6273	20	10	22.5999	0.12685	0.00561286	Q9BW04	SARG	1423	Specifically androgen-regulated gene protein [OS=Homo sapiens]
24.2386	24.1642	24.2767	24.1999	24.06	24.4665	35	20	24.2343	0.135767	0.00560227	P48444	ARCN1	1424	Coatomer subunit delta [OS=Homo sapiens]
23.1234	22.9994	23.1211	22.822	23.0449	22.8611	24	8	22.9953	0.128652	0.00559471	O75791	GRAP2	1425	GRB2-related adapter protein 2 [OS=Homo sapiens]
25.0115	25.2704	25.1449	25.187	25.3003	24.947	27	17	25.1435	0.140447	0.00558579	O00429	DNM1L	1426	Dynamin-1-like protein [OS=Homo sapiens]
23.0208	22.8721	23.1259	23.0167	22.8115	22.8223	30	5	22.9449	0.127906	0.00557448	O95292	VAPB	1427	Vesicle-associated membrane protein-associated protein B/C [OS=Homo sapiens]
26.6238	26.7811	26.4363	26.5403	26.4522	26.756	29	18	26.5983	0.148248	0.0055736	P31146	CORO1A	1428	Coronin-1A [OS=Homo sapiens]
21.6734	21.9167	21.6063	21.5731	21.6962	21.723	14	5	21.6981	0.1209	0.0055719	Q9UBS4	DNAJB11	1429	DnaJ homolog subfamily B member 11 [OS=Homo sapiens]
24.7773	24.5582	24.4034	24.5873	24.4326	24.4748	20	17	24.5389	0.136622	0.00556758	P13671	C6	1430	Complement component c6 [OS=Homo sapiens]
20.0821	20.3234	20.3426	20.3874	20.3351	20.2154	15	4	20.281	0.112887	0.00556614	P53004	BLVRA	1431	Biliverdin reductase A [OS=Homo sapiens]
21.2174	21.2464	21.2674	21.3878	21.2429	21.0232	9	4	21.2309	0.118032	0.00555943	Q92598	HSPH1	1432	Isoform 4 of Heat shock protein 105 kDa [OS=Homo sapiens]
23.6194	23.931	23.7583	23.8866	23.8697	23.642	13	4	23.7845	0.132211	0.0055587	Q9Y376	CAB39	1433	Calcium-binding protein 39 [OS=Homo sapiens]
25.064	25.4094	25.2904	25.2533	25.3784	25.1073	17	8	25.2505	0.140353	0.00555845	O75390	CS	1434	citrate synthase, mitochondrial [OS=Homo sapiens]
22.778	23.0799	22.7868	22.9201	22.8042	22.7444	21	9	22.8522	0.126637	0.00554156	P08670	VIM	1435	Vimentin [OS=Homo sapiens]
24.3762	24.3371	24.4623	24.3031	24.3157	24.0614	31	6	24.3093	0.134316	0.0055253	P48047	ATP5PO	1436	ATP synthase subunit O, mitochondrial [OS=Homo sapiens]
21.066	20.9479	20.9284	21.1113	21.2243	21.1527	14	5	21.0718	0.116029	0.00550638	Q9HB40	SCPEP1	1437	Retinoid-inducible serine carboxypeptidase [OS=Homo sapiens]
25.7191	25.7752	25.6402	25.4664	25.4572	25.7481	3	13	25.6344	0.141123	0.00550523	O15050	TRANK1	1438	TPR and ankyrin repeat-containing protein 1 [OS=Homo sapiens]
27.0576	27.2105	27.1162	27.2772	27.4365	27.0494	26	18	27.1912	0.149353	0.0054927	P09871	C1S	1439	Complement C1s subcomponent [OS=Homo sapiens]
25.8681	26.1775	25.9494	25.8205	25.7735	25.9163	28	22	25.9176	0.142264	0.00548908	P16615	ATP2A2	1440	Sarcoplasmic/endoplasmic reticulum calcium ATPase 2 [OS=Homo sapiens]
22.9901	23.1559	22.8815	22.9885	22.8917	22.7895	20	11	22.9495	0.125958	0.00548847	P07954	FH	1441	fumarate hydratase, mitochondrial [OS=Homo sapiens]
21.676	21.5211	21.7308	21.7825	21.8175	21.8479	10	7	21.7293	0.119065	0.00547947	Q6UWL2	SUSD1	1442	Isoform 2 of Sushi domain-containing protein 1 [OS=Homo sapiens]
21.4465	21.4498	21.4997	21.5516	21.6974	21.3515	27	10	21.4994	0.117541	0.00546719	Q9UNM6	PSMD13	1443	26S proteasome non-ATPase regulatory subunit 13 [OS=Homo sapiens]
19.7969	19.9031	19.6615	19.89	19.746	19.6544	6	3	19.7753	0.108037	0.00546321	P10515	DLAT	1444	Dihydrolipoyllysine-residue acetyltransferase component of pyruvate dehydrogenase complex, mitochondrial [OS=Homo sapiens]
26.5539	26.2013	26.6131	26.5021	26.4088	26.489	28	12	26.4614	0.144505	0.005461	O43294	TGFB1I1	1445	Transforming growth factor beta-1-induced transcript 1 protein [OS=Homo sapiens]
24.246	24.604	24.5029	24.4925	24.5141	24.6181	52	13	24.4963	0.133761	0.00546048	P08779	KRT16	1446	Keratin, type I cytoskeletal 16 [OS=Homo sapiens]
25.4582	25.7362	25.6016	25.6273	25.6483	25.3537	29	19	25.5709	0.139525	0.00545641	P49748	ACADVL	1447	Very long-chain specific acyl-CoA dehydrogenase, mitochondrial [OS=Homo sapiens]
24.8825	24.9412	24.9355	24.6685	24.733	24.6436	17	15	24.8007	0.135165	0.00545002	Q9H3U1	UNC45A	1448	Isoform 2 of Protein unc-45 homolog A [OS=Homo sapiens]
19.7193	19.8092	19.6473	19.8829	19.8501	19.9386	2	2	19.8079	0.107835	0.00544404	P22102	GART	1449	trifunctional purine biosynthetic protein adenosine-3 [OS=Homo sapiens]
28.6453	28.838	28.8268	28.7196	28.6765	28.4104	22	35	28.6861	0.156029	0.0054392	P16157	ANK1	1450	ankyrin-1 [OS=Homo sapiens]
24.8023	24.9991	24.773	25.0317	25.1064	24.8616	8	14	24.929	0.135552	0.00543752	Q92954	PRG4	1451	Proteoglycan 4 [OS=Homo sapiens]
28.3688	28.5795	28.6178	28.6382	28.6649	28.2978	39	24	28.5278	0.154892	0.00542949	Q01518	CAP1	1452	adenylyl cyclase-associated protein 1 [OS=Homo sapiens]
22.7828	22.7751	22.6491	22.6912	22.9772	22.6534	6	7	22.7548	0.123418	0.00542383	Q9UBN7	HDAC6	1453	histone deacetylase 6 [OS=Homo sapiens]
24.2398	24.5453	24.2802	24.5339	24.501	24.4203	36	16	24.4201	0.132095	0.00540929	P41240	CSK	1454	tyrosine-protein kinase CSK [OS=Homo sapiens]
22.0802	22.3397	22.2836	22.072	22.2839	22.111	38	4	22.1951	0.120025	0.00540775	O43768	ENSA	1455	alpha-endosulfine [OS=Homo sapiens]
24.5167	24.8115	24.5611	24.8135	24.8043	24.7045	26	2	24.7019	0.133458	0.00540271	A2NJV5	IGKV2-29	1456	Immunoglobulin kappa variable 2-29 [OS=Homo sapiens]
24.6413	24.8154	24.7206	24.6661	24.4136	24.6525	5	3	24.6516	0.133088	0.00539877	Q8TC07	TBC1D15	1457	Isoform 2 of TBC1 domain family member 15 [OS=Homo sapiens]
23.6418	23.4684	23.6162	23.4323	23.4905	23.7647	22	25	23.569	0.127123	0.00539367	Q9Y4D1	DAAM1	1458	Isoform 2 of Disheveled-associated activator of morphogenesis 1 [OS=Homo sapiens]
23.9425	24.1278	24.0051	24.0429	23.8596	23.7714	35	10	23.9582	0.128861	0.00537858	Q9UIB8	CD84	1459	SLAM family member 5 [OS=Homo sapiens]
25.0953	25.2916	25.4142	25.2735	25.2589	25.0476	29	18	25.2302	0.135563	0.00537306	Q7LDG7	RASGRP2	1460	RAS guanyl-releasing protein 2 [OS=Homo sapiens]
26.2448	26.3775	26.118	26.1101	26.1404	26.4362	26	25	26.2378	0.140765	0.00536495	P49588	AARS1	1461	Alanine--tRNA ligase, cytoplasmic [OS=Homo sapiens]
28.2327	28.4014	28.1445	28.4887	28.2683	28.0892	43	11	28.2708	0.151594	0.0053622	P00738	HP	1462	Haptoglobin [OS=Homo sapiens]
24.4154	24.6822	24.5019	24.7743	24.6299	24.6804	35	7	24.614	0.131912	0.00535923	P51149	RAB7A	1463	ras-related protein Rab-7a [OS=Homo sapiens]
23.7528	23.4395	23.6686	23.7268	23.7404	23.5462	34	5	23.6457	0.126449	0.00534764	P13073	COX4I1	1464	Cytochrome c oxidase subunit 4 isoform 1, mitochondrial [OS=Homo sapiens]
25.4613	25.1125	25.2975	25.2289	25.3534	25.4558	9	29	25.3182	0.135196	0.00533986	Q96RL7	VPS13A	1465	Isoform 4 of Vacuolar protein sorting-associated protein 13A [OS=Homo sapiens]
22.6349	22.9019	22.7682	22.8954	22.7653	22.6205	18	11	22.7644	0.121282	0.00532772	P17858	PFKL	1466	ATP-dependent 6-phosphofructokinase, liver type [OS=Homo sapiens]
26.3676	25.988	26.1894	26.0243	26.1302	26.055	21	4	26.1258	0.13916	0.00532655	P0DOX2	#N/A	1467	Immunoglobulin alpha-2 heavy chain [OS=Homo sapiens]
23.5649	23.3873	23.3129	23.5121	23.6376	23.3817	25	12	23.4661	0.124975	0.00532576	P63010	AP2B1	1468	AP-2 complex subunit beta [OS=Homo sapiens]
22.6786	22.7251	22.6675	22.7949	22.8339	22.9892	12	7	22.7815	0.120685	0.00529749	P51812	RPS6KA3	1469	Ribosomal protein S6 kinase alpha-3 [OS=Homo sapiens]
22.3934	22.2075	22.2191	22.2523	22.253	22.504	2	7	22.3049	0.118146	0.00529687	Q12923	PTPN13	1470	Isoform 4 of Tyrosine-protein phosphatase non-receptor type 13 [OS=Homo sapiens]
26.2858	26.6666	26.3521	26.529	26.4902	26.3757	34	15	26.4499	0.139185	0.0052622	P27797	CALR	1471	Calreticulin [OS=Homo sapiens]
21.107	21.1192	21.2745	21.044	21.1509	20.9414	15	3	21.1062	0.110934	0.00525599	Q9H2U2	PPA2	1472	Isoform 2 of Inorganic pyrophosphatase 2, mitochondrial [OS=Homo sapiens]
25.9333	26.2835	26.2696	26.1734	26.1289	26.0272	32	7	26.136	0.137094	0.00524543	P24539	ATP5PB	1473	ATP synthase F(0) complex subunit B1, mitochondrial [OS=Homo sapiens]
24.356	24.1961	24.3998	24.0779	24.2458	24.1231	25	7	24.2331	0.126986	0.0052402	Q15257	PTPA	1474	Isoform 4 of Serine/threonine-protein phosphatase 2A activator [OS=Homo sapiens]
23.3389	23.1521	23.4183	23.5055	23.4444	23.3923	5	2	23.3753	0.122489	0.00524009	Q12840	KIF5A	1475	Kinesin heavy chain isoform 5A [OS=Homo sapiens]
23.2088	23.1045	23.1803	22.8811	23.1704	23.0689	24	4	23.1023	0.120088	0.00519807	Q3ZCW2	LGALSL	1476	Galectin-related protein [OS=Homo sapiens]
28.1653	28.5718	28.4079	28.4196	28.3001	28.2309	37	3	28.3493	0.147105	0.00518904	P01717	IGLV3-25	1477	Immunoglobulin lambda variable 3-25 [OS=Homo sapiens]
27.5185	27.1521	27.4746	27.2561	27.2617	27.3841	39	11	27.3412	0.141717	0.0051833	Q14847	LASP1	1478	Isoform 2 of LIM and SH3 domain protein 1 [OS=Homo sapiens]
25.1058	24.9871	25.3141	25.3019	25.2159	25.0848	40	15	25.1683	0.130428	0.00518225	O75563	SKAP2	1479	src kinase-associated phosphoprotein 2 [OS=Homo sapiens]
24.4327	24.5896	24.3923	24.717	24.5432	24.4075	25	14	24.5137	0.126916	0.00517735	Q13094	LCP2	1480	lymphocyte cytosolic protein 2 [OS=Homo sapiens]
22.7962	23.0361	22.8459	22.9932	22.8939	22.7233	5	3	22.8814	0.118404	0.00517468	Q96AC1	FERMT2	1481	Fermitin family homolog 2 [OS=Homo sapiens]
21.7538	21.6375	21.5551	21.4735	21.4855	21.678	1	1	21.5972	0.111545	0.00516476	O43861	ATP9B	1482	Probable phospholipid-transporting ATPase IIB [OS=Homo sapiens]
25.9934	25.7504	25.8838	25.6677	25.7711	25.9855	23	19	25.842	0.133455	0.00516427	P07384	CAPN1	1483	Calpain-1 catalytic subunit [OS=Homo sapiens]
24.02	24.1973	24.1571	24.1744	23.9948	23.8851	21	2	24.0714	0.124112	0.00515596	P01624	IGKV3-15	1484	Immunoglobulin kappa variable 3-15 [OS=Homo sapiens]
22.6805	22.9088	22.9024	22.7591	22.7044	22.9534	22	5	22.8181	0.117467	0.00514796	O75915	ARL6IP5	1485	PRA1 family protein 3 [OS=Homo sapiens]
22.5877	22.8034	22.8789	22.9262	22.8325	22.8311	28	17	22.81	0.1172	0.00513808	P31040	SDHA	1486	Succinate dehydrogenase [ubiquinone] flavoprotein subunit, mitochondrial [OS=Homo sapiens]
23.056	23.0639	23.1797	23.1449	22.9352	22.8749	16	3	23.0424	0.11795	0.00511881	Q9UBQ0	VPS29	1487	Vacuolar protein sorting-associated protein 29 [OS=Homo sapiens]
22.9684	22.8563	22.8849	23.0767	23.1502	23.0775	10	7	23.0023	0.117733	0.00511831	O95202	LETM1	1488	mitochondrial proton/calcium exchanger protein [OS=Homo sapiens]
24.5981	24.8948	24.7459	24.6375	24.5745	24.5813	15	13	24.672	0.126077	0.00511012	Q9UKE5	TNIK	1489	Isoform 4 of TRAF2 and NCK-interacting protein kinase [OS=Homo sapiens]
20.0771	20.1822	20.3597	20.3229	20.1844	20.2422	3	2	20.2281	0.103268	0.00510517	Q96K49	TMEM87B	1490	Isoform 2 of Transmembrane protein 87B [OS=Homo sapiens]
28.7038	28.8936	28.9052	28.617	28.5702	28.6225	43	24	28.7187	0.146449	0.00509944	Q13418	ILK	1491	Integrin-linked protein kinase [OS=Homo sapiens]
23.9617	23.9305	24.1642	23.8405	23.9172	23.8249	20	10	23.9398	0.12205	0.00509822	O43865	AHCYL1	1492	S-adenosylhomocysteine hydrolase-like protein 1 [OS=Homo sapiens]
25.3702	25.1461	25.0191	25.1083	25.184	25.2995	31	18	25.1879	0.128274	0.0050927	P48643	CCT5	1493	T-complex protein 1 subunit epsilon [OS=Homo sapiens]
23.4389	23.26	23.2581	23.1715	23.1038	23.1572	18	7	23.2316	0.118299	0.00509217	P04180	LCAT	1494	phosphatidylcholine-sterol acyltransferase [OS=Homo sapiens]
24.7816	24.9803	24.8722	25.0719	25.0934	24.8487	51	3	24.9414	0.126929	0.00508908	O14950	MYL12B	1495	Myosin regulatory light chain 12B [OS=Homo sapiens]
24.3967	24.7573	24.4901	24.6202	24.4954	24.562	38	17	24.5536	0.124942	0.00508855	P49411	TUFM	1496	elongation factor Tu, mitochondrial [OS=Homo sapiens]
23.586	23.8669	23.6121	23.5825	23.5859	23.7633	23	8	23.6661	0.120415	0.00508807	P09496	CLTA	1497	clathrin light chain A [OS=Homo sapiens]
25.2986	25.3855	25.4769	25.383	25.3524	25.0979	18	9	25.3324	0.128687	0.00507994	P49908	SELENOP	1498	Selenoprotein P [OS=Homo sapiens]
22.6322	22.5339	22.5258	22.6902	22.8287	22.7087	8	3	22.6533	0.115048	0.00507866	Q6PL24	TMED8	1499	Protein TMED8 [OS=Homo sapiens]
22.5081	22.2826	22.2391	22.424	22.4749	22.2883	16	3	22.3695	0.113527	0.00507508	Q9BRG1	VPS25	1500	Vacuolar protein-sorting-associated protein 25 [OS=Homo sapiens]
25.5574	25.4356	25.4003	25.4477	25.1721	25.4583	24	4	25.4119	0.128673	0.0050635	P62873	GNB1	1501	Guanine nucleotide-binding protein G(I)/G(S)/G(T) subunit beta-1 [OS=Homo sapiens]
30.4043	30.1074	30.5755	30.279	30.3578	30.3576	68	27	30.3469	0.153467	0.00505708	P02649	APOE	1502	Apolipoprotein E [OS=Homo sapiens]
18.2184	18.3981	18.2318	18.2833	18.1979	18.4082	4	1	18.2896	0.0924115	0.00505267	O60762	DPM1	1503	Dolichol-phosphate mannosyltransferase subunit 1 [OS=Homo sapiens]
27.4424	27.4209	27.7125	27.3231	27.3489	27.4551	32	15	27.4505	0.138676	0.00505186	P08567	PLEK	1504	pleckstrin [OS=Homo sapiens]
25.8118	26.0362	25.705	26.0107	25.9447	25.8109	21	20	25.8866	0.130722	0.00504982	Q70J99	UNC13D	1505	Protein unc-13 homolog D [OS=Homo sapiens]
27.5236	27.5262	27.6371	27.3839	27.2895	27.3107	72	11	27.4452	0.138263	0.00503779	P62937	PPIA	1506	peptidyl-prolyl cis-trans isomerase A [OS=Homo sapiens]
21.6816	22.0105	21.8394	21.7969	21.7873	21.7632	13	3	21.8131	0.109874	0.00503704	Q9NR28	DIABLO	1507	Diablo homolog, mitochondrial [OS=Homo sapiens]
23.2653	23.0618	23.2136	23.3181	23.242	23.414	62	7	23.2525	0.117087	0.00503545	P30044	PRDX5	1508	Isoform Cytoplasmic+peroxisomal of Peroxiredoxin-5, mitochondrial [OS=Homo sapiens]
19.9883	20.1095	20.0967	20.286	20.1385	20.2047	12	3	20.1373	0.101285	0.00502975	P00915	CA1	1509	carbonic anhydrase 1 [OS=Homo sapiens]
23.9284	23.7472	23.868	23.6048	23.703	23.8441	15	3	23.7826	0.119617	0.00502961	Q00765	REEP5	1510	Receptor expression-enhancing protein 5 [OS=Homo sapiens]
23.6065	23.7178	23.6448	23.8986	23.8606	23.8174	41	4	23.7576	0.119364	0.00502426	P61604	HSPE1	1511	10 kDa heat shock protein, mitochondrial [OS=Homo sapiens]
24.4443	24.3072	24.3866	24.4219	24.3942	24.6689	32	17	24.4372	0.122705	0.00502124	Q96HC4	PDLIM5	1512	PDZ and LIM domain protein 5 [OS=Homo sapiens]
24.9816	24.9507	25.1405	25.1447	25.296	25.1382	1	1	25.1086	0.125974	0.00501716	Q5SNT2	TMEM201	1513	Transmembrane protein 201 [OS=Homo sapiens]
26.142	26.3305	26.553	26.3544	26.3067	26.3779	21	8	26.3441	0.132156	0.00501653	P26641	EEF1G	1514	elongation factor 1-gamma [OS=Homo sapiens]
20.5121	20.7141	20.5966	20.7607	20.7471	20.5738	5	1	20.6507	0.103393	0.00500676	O60636	TSPAN2	1515	tetraspanin-2 [OS=Homo sapiens]
20.9672	20.871	20.8889	21.0116	21.1252	21.0974	26	3	20.9935	0.104986	0.00500089	Q9Y6B6	SAR1B	1516	GTP-binding protein SAR1b [OS=Homo sapiens]
24.6981	24.7574	24.6693	24.7575	24.4584	24.8032	22	16	24.6906	0.123314	0.00499438	P80108	GPLD1	1517	Phosphatidylinositol-glycan-specific phospholipase D [OS=Homo sapiens]
26.1827	26.3704	26.5405	26.2259	26.2514	26.3738	40	17	26.3241	0.131426	0.0049926	P78371	CCT2	1518	T-complex protein 1 subunit beta [OS=Homo sapiens]
20.8126	21.0406	21.0525	20.8983	21.0643	20.9039	29	8	20.9621	0.104487	0.0049846	Q9Y266	NUDC	1519	nuclear migration protein nudC [OS=Homo sapiens]
29.011	29.1183	29.0849	29.0727	28.7362	29.1042	67	10	29.0212	0.14447	0.00497808	P60660	MYL6	1520	Myosin light polypeptide 6 [OS=Homo sapiens]
20.7765	21.0093	20.8943	20.9603	21.0704	20.8806	1	1	20.9319	0.104089	0.00497272	Q96G01	BICD1	1521	Protein bicaudal D homolog 1 [OS=Homo sapiens]
25.0972	24.8901	24.7992	24.7428	24.8219	24.8395	14	8	24.8651	0.123532	0.00496808	P18428	LBP	1522	lipopolysaccharide-binding protein [OS=Homo sapiens]
26.159	26.1081	25.9518	25.9196	25.8955	25.8285	23	7	25.9771	0.128803	0.00495835	P51884	LUM	1523	Lumican [OS=Homo sapiens]
23.8966	24.1851	23.9598	23.9737	23.9456	23.8346	41	11	23.9659	0.118799	0.00495701	Q14165	MLEC	1524	Malectin [OS=Homo sapiens]
24.6643	24.6763	24.6515	24.6165	24.6728	24.9507	19	10	24.7054	0.122138	0.0049438	P40197	GP5	1525	Platelet glycoprotein V [OS=Homo sapiens]
23.5088	23.3566	23.4624	23.6482	23.6459	23.4475	9	11	23.5116	0.116013	0.00493429	O43306	ADCY6	1526	Adenylate cyclase type 6 [OS=Homo sapiens]
23.4708	23.6147	23.7488	23.6076	23.6017	23.4227	37	6	23.5777	0.116243	0.00493021	P51452	DUSP3	1527	dual specificity protein phosphatase 3 [OS=Homo sapiens]
26.5082	26.888	26.7404	26.6971	26.8011	26.6417	52	7	26.7127	0.131481	0.00492202	P21291	CSRP1	1528	Cysteine and glycine-rich protein 1 [OS=Homo sapiens]
25.0259	25.1403	25.0154	25.0758	25.3113	24.9704	39	12	25.0899	0.123031	0.0049036	O75558	STX11	1529	syntaxin-11 [OS=Homo sapiens]
27.8415	27.5965	27.5362	27.5948	27.5117	27.7815	54	14	27.6437	0.135449	0.0048998	O00151	PDLIM1	1530	PDZ and LIM domain protein 1 [OS=Homo sapiens]
28.4271	28.7763	28.7362	28.5412	28.5547	28.4811	42	3	28.5861	0.139996	0.00489734	P61006	RAB8A	1531	Ras-related protein Rab-8A [OS=Homo sapiens]
23.691	23.9401	23.6725	23.6375	23.635	23.6673	21	8	23.7072	0.116082	0.00489647	P11766	ADH5	1532	alcohol dehydrogenase class-3 [OS=Homo sapiens]
25.2873	25.1533	25.1252	24.9446	24.9946	25.0569	22	9	25.0937	0.122816	0.00489431	P55058	PLTP	1533	phospholipid transfer protein [OS=Homo sapiens]
28.2715	28.5801	28.2339	28.4624	28.5302	28.398	36	10	28.4127	0.138888	0.00488823	P78417	GSTO1	1534	Glutathione S-transferase omega-1 [OS=Homo sapiens]
25.4522	25.5673	25.549	25.4944	25.7045	25.3322	51	11	25.5166	0.124567	0.00488179	P00918	CA2	1535	Carbonic anhydrase 2 [OS=Homo sapiens]
24.7459	24.837	24.9227	25.0407	24.7082	24.8791	39	13	24.8556	0.121154	0.00487433	P13646	KRT13	1536	Keratin, type I cytoskeletal 13 [OS=Homo sapiens]
24.5742	24.8052	24.6399	24.7468	24.8981	24.6499	21	33	24.719	0.120222	0.00486354	Q9NYU2	UGGT1	1537	UDP-glucose:glycoprotein glucosyltransferase 1 [OS=Homo sapiens]
22.0318	22.1659	22.091	22.0509	21.852	21.9756	18	10	22.0279	0.107005	0.00485772	Q05655	PRKCD	1538	protein kinase C delta type [OS=Homo sapiens]
24.3234	24.4368	24.2386	24.2783	24.4504	24.1437	25	11	24.3118	0.118089	0.00485724	P00505	GOT2	1539	Aspartate aminotransferase, mitochondrial [OS=Homo sapiens]
24.8872	24.8074	24.9636	24.7787	24.9433	25.1126	39	16	24.9155	0.12097	0.0048552	P10644	PRKAR1A	1540	cAMP-dependent protein kinase type I-alpha regulatory subunit [OS=Homo sapiens]
24.4516	24.7856	24.5805	24.6053	24.5317	24.7009	30	3	24.6093	0.119326	0.00484883	P15153	RAC2	1541	Ras-related C3 botulinum toxin substrate 2 [OS=Homo sapiens]
24.1975	24.2844	24.1064	24.0849	23.9363	24.1186	29	2	24.1213	0.11676	0.00484053	P07948	LYN	1542	Isoform 2 of Tyrosine-protein kinase Lyn [OS=Homo sapiens]
23.6985	23.8017	23.784	23.6885	23.792	23.4988	25	7	23.7106	0.114745	0.0048394	Q9UGM5	FETUB	1543	Fetuin-B [OS=Homo sapiens]
24.2332	24.4177	24.3101	24.5717	24.3272	24.3212	29	8	24.3635	0.117633	0.00482823	Q16698	DECR1	1544	Isoform 2 of 2,4-dienoyl-CoA reductase, mitochondrial [OS=Homo sapiens]
22.0295	21.9675	21.7986	22.1057	22.0101	22.051	17	9	21.9937	0.105948	0.00481717	O00116	AGPS	1545	Alkyldihydroxyacetonephosphate synthase, peroxisomal [OS=Homo sapiens]
23.1582	23.381	23.2645	23.463	23.3906	23.2544	19	10	23.3186	0.111987	0.00480248	P52306	RAP1GDS1	1546	Rap1 GTPase-GDP dissociation stimulator 1 [OS=Homo sapiens]
26.0487	26.3888	26.1756	26.1796	26.1714	26.0425	48	16	26.1677	0.125641	0.00480138	P00338	LDHA	1547	L-lactate dehydrogenase A chain [OS=Homo sapiens]
24.1028	23.8693	24.0429	24.0168	24.0664	24.2227	13	7	24.0535	0.115412	0.00479812	P10619	CTSA	1548	lysosomal protective protein [OS=Homo sapiens]
21.6549	21.6284	21.7405	21.7025	21.5263	21.8312	12	3	21.6806	0.103864	0.00479062	O75822	EIF3J	1549	Eukaryotic translation initiation factor 3 subunit J [OS=Homo sapiens]
26.6521	26.5224	26.9007	26.666	26.7727	26.6678	25	16	26.697	0.127716	0.00478393	P02748	C9	1550	complement component C9 [OS=Homo sapiens]
18.9603	18.9126	18.7729	18.9783	18.772	18.8616	10	4	18.8763	0.0900674	0.00477146	Q13217	DNAJC3	1551	DnaJ homolog subfamily C member 3 [OS=Homo sapiens]
23.3965	23.4415	23.3559	23.6697	23.4766	23.5336	29	10	23.479	0.112003	0.00477034	Q7Z434	MAVS	1552	Mitochondrial antiviral-signaling protein [OS=Homo sapiens]
26.5443	26.5076	26.4637	26.553	26.2452	26.3299	26	46	26.4406	0.125588	0.00474982	P01031	C5	1553	Complement C5 [OS=Homo sapiens]
21.7414	21.9351	21.8395	21.9867	21.9153	21.7391	3	1	21.8595	0.103786	0.00474788	P31995	FCGR2C	1554	Low affinity immunoglobulin gamma Fc region receptor II-c [OS=Homo sapiens]
25.7543	25.7818	25.8639	25.9266	26.0495	25.7254	33	18	25.8502	0.122641	0.00474428	P04040	CAT	1555	catalase [OS=Homo sapiens]
27.1127	27.0374	27.0458	27.1624	26.9164	27.2915	41	10	27.0944	0.127367	0.00470085	P01876	IGHA1	1556	immunoglobulin heavy constant alpha 1 [OS=Homo sapiens]
24.6785	24.9505	24.8217	24.8995	24.8475	24.664	20	11	24.8103	0.116556	0.00469791	P16452	EPB42	1557	Isoform Long of Erythrocyte membrane protein band 4.2 [OS=Homo sapiens]
19.6248	19.6153	19.4515	19.4582	19.4037	19.4954	3	1	19.5081	0.0914911	0.0046899	P68402	PAFAH1B2	1558	platelet-activating factor acetylhydrolase IB subunit beta [OS=Homo sapiens]
29.1345	29.1066	29.0112	29.1114	29.2439	29.4027	37	22	29.1684	0.136788	0.00468961	P10909	CLU	1559	Isoform 2 of Clusterin [OS=Homo sapiens]
26.4828	26.3243	26.5542	26.2547	26.2504	26.3574	28	4	26.3706	0.123667	0.00468959	P62158	CALM1	1560	Calmodulin [OS=Homo sapiens]
26.5822	26.697	26.8759	26.6302	26.8185	26.5797	34	16	26.6973	0.125016	0.00468271	P48735	IDH2	1561	Isocitrate dehydrogenase [NADP], mitochondrial [OS=Homo sapiens]
24.5944	24.6581	24.567	24.7404	24.7122	24.4236	26	11	24.6159	0.11522	0.00468069	P49189	ALDH9A1	1562	4-trimethylaminobutyraldehyde dehydrogenase [OS=Homo sapiens]
25.7095	25.6087	25.5878	25.6476	25.9017	25.7912	35	23	25.7077	0.120319	0.00468025	Q9NTJ5	SACM1L	1563	Phosphatidylinositide phosphatase SAC1 [OS=Homo sapiens]
26.5548	26.8717	26.744	26.7736	26.6419	26.5713	35	26	26.6929	0.124552	0.0046661	P55072	VCP	1564	Transitional endoplasmic reticulum ATPase [OS=Homo sapiens]
21.9593	21.9296	22.2014	21.927	22.0132	22.0163	19	3	22.0078	0.102551	0.00465973	P07947	YES1	1565	tyrosine-protein kinase Yes [OS=Homo sapiens]
25.8142	25.8316	25.756	26.0288	26.0316	25.806	17	18	25.878	0.12052	0.00465723	P00450	CP	1566	Ceruloplasmin [OS=Homo sapiens]
25.5564	25.5224	25.6875	25.8358	25.7448	25.6112	19	7	25.6597	0.119093	0.00464127	Q9H223	EHD4	1567	EH domain-containing protein 4 [OS=Homo sapiens]
24.7277	24.7399	24.5842	24.7886	24.6989	24.4828	17	8	24.6703	0.114459	0.00463952	P08697	SERPINF2	1568	Alpha-2-antiplasmin [OS=Homo sapiens]
25.8879	25.7466	26.071	26.0177	25.8234	25.9133	19	91	25.91	0.120185	0.00463858	Q15149	PLEC	1569	Isoform 7 of Plectin [OS=Homo sapiens]
23.7658	23.8525	23.8608	23.8816	23.7105	23.5965	37	8	23.7779	0.110246	0.00463648	Q13162	PRDX4	1570	Peroxiredoxin-4 [OS=Homo sapiens]
24.1655	24.4798	24.2146	24.3518	24.2574	24.2543	17	16	24.2872	0.112538	0.00463363	P55786	NPEPPS	1571	puromycin-sensitive aminopeptidase [OS=Homo sapiens]
22.9977	22.9486	22.8061	22.7242	22.8312	22.7711	15	5	22.8465	0.105646	0.00462416	Q13011	ECH1	1572	Delta(3,5)-Delta(2,4)-dienoyl-CoA isomerase, mitochondrial [OS=Homo sapiens]
24.8787	25.1846	24.9843	24.9734	24.9726	24.8594	21	4	24.9755	0.115469	0.0046233	Q15363	TMED2	1573	Transmembrane emp24 domain-containing protein 2 [OS=Homo sapiens]
25.4849	25.5771	25.5116	25.5876	25.5801	25.2793	25	27	25.5034	0.117524	0.00460817	Q92619	ARHGAP45	1574	Rho GTPase-activating protein 45 [OS=Homo sapiens]
23.8637	23.9197	23.8728	23.8865	23.6206	23.8844	12	7	23.8413	0.109794	0.00460522	P00748	F12	1575	Coagulation factor XII [OS=Homo sapiens]
28.3756	28.3955	28.2949	28.552	28.6365	28.3538	44	10	28.4347	0.130834	0.0046012	Q15907	RAB11B	1576	Ras-related protein Rab-11B [OS=Homo sapiens]
22.7317	22.8396	22.6643	22.8693	22.9494	22.8796	2	2	22.8223	0.104976	0.00459972	Q9UIA9	XPO7	1577	exportin-7 [OS=Homo sapiens]
25.7007	25.6556	25.5788	25.8216	25.4823	25.578	27	18	25.6362	0.117706	0.00459139	P00751	CFB	1578	Complement factor B [OS=Homo sapiens]
22.4538	22.4136	22.447	22.212	22.492	22.338	13	4	22.3927	0.102579	0.00458089	Q16775	HAGH	1579	Hydroxyacylglutathione hydrolase, mitochondrial [OS=Homo sapiens]
25.3813	25.2039	25.3166	25.1026	25.1656	25.1004	24	17	25.2117	0.115107	0.00456561	O14672	ADAM10	1580	Disintegrin and metalloproteinase domain-containing protein 10 [OS=Homo sapiens]
27.7834	27.6183	27.8258	27.9951	27.7037	27.7793	49	25	27.7843	0.126679	0.00455937	P26038	MSN	1581	Moesin [OS=Homo sapiens]
23.2939	23.4682	23.392	23.5391	23.5139	23.2975	18	10	23.4174	0.106742	0.00455823	P39656	DDOST	1582	Dolichyl-diphosphooligosaccharide--protein glycosyltransferase 48 kDa subunit [OS=Homo sapiens]
24.6734	24.4257	24.5711	24.5654	24.4814	24.7221	20	7	24.5732	0.11177	0.00454845	Q15084	PDIA6	1583	Protein disulfide-isomerase A6 [OS=Homo sapiens]
24.6597	24.6309	24.8237	24.9015	24.8633	24.7234	23	11	24.7671	0.111821	0.00451489	P20073	ANXA7	1584	Annexin A7 [OS=Homo sapiens]
27.3775	27.4732	27.5167	27.6698	27.6319	27.3771	27	14	27.5077	0.124084	0.00451088	P14314	PRKCSH	1585	Isoform 2 of Glucosidase 2 subunit beta [OS=Homo sapiens]
22.0278	21.9764	21.8177	22.0616	22.0624	21.8949	8	3	21.9735	0.0990582	0.00450808	Q9NZP8	C1RL	1586	Complement C1r subcomponent-like protein [OS=Homo sapiens]
27.3747	27.4977	27.3942	27.516	27.5329	27.7207	35	11	27.506	0.123899	0.00450442	P35232	PHB	1587	Prohibitin [OS=Homo sapiens]
26.1077	26.1884	26.2603	26.1122	26.0891	25.9101	41	26	26.1113	0.117593	0.00450352	Q13586	STIM1	1588	stromal interaction molecule 1 [OS=Homo sapiens]
27.4881	27.5544	27.5919	27.3192	27.2872	27.4428	9	2	27.4473	0.123378	0.00449511	Q9H0E2	TOLLIP	1589	Toll-interacting protein [OS=Homo sapiens]
21.857	22.0225	21.9606	21.844	21.7443	21.9279	36	4	21.8927	0.0983493	0.00449233	P09488	GSTM1	1590	Isoform 2 of Glutathione S-transferase Mu 1 [OS=Homo sapiens]
25.399	25.1968	25.3143	25.4069	25.3802	25.1392	6	5	25.3061	0.11326	0.00447562	P09327	VIL1	1591	Villin-1 [OS=Homo sapiens]
20.2974	20.5437	20.394	20.3576	20.3391	20.4678	10	5	20.3999	0.0908933	0.00445557	Q9HD45	TM9SF3	1592	Transmembrane 9 superfamily member 3 [OS=Homo sapiens]
23.8577	23.769	23.864	24.0524	24.0123	23.8745	23	15	23.905	0.10639	0.00445054	P06737	PYGL	1593	Glycogen phosphorylase, liver form [OS=Homo sapiens]
21.7488	21.7727	21.7185	21.9691	21.7376	21.8654	11	7	21.802	0.0967068	0.00443568	Q9Y5K6	CD2AP	1594	CD2-associated protein [OS=Homo sapiens]
22.1971	22.3899	22.1956	22.1527	22.2717	22.3697	19	5	22.2628	0.0986128	0.00442949	O14618	CCS	1595	copper chaperone for superoxide dismutase [OS=Homo sapiens]
24.5294	24.6487	24.8263	24.7792	24.7227	24.6244	16	5	24.6884	0.109001	0.00441505	O95445	APOM	1596	apolipoprotein M [OS=Homo sapiens]
24.3926	24.3918	24.3695	24.6275	24.5469	24.5457	25	5	24.479	0.107862	0.00440631	P02747	C1QC	1597	Complement C1q subcomponent subunit C [OS=Homo sapiens]
27.5529	27.4565	27.5439	27.4496	27.7845	27.5707	41	11	27.5597	0.121417	0.00440561	Q99439	CNN2	1598	Calponin-2 [OS=Homo sapiens]
23.6174	23.7518	23.5248	23.6654	23.8195	23.6322	62	7	23.6685	0.104224	0.00440348	O75964	ATP5MG	1599	ATP synthase subunit g, mitochondrial [OS=Homo sapiens]
22.0018	22.0968	21.8932	22.1364	21.9241	22.0597	0	1	22.0187	0.0965682	0.00438574	Q86YA3	ZGRF1	1600	Protein ZGRF1 [OS=Homo sapiens]
25.3259	25.6052	25.538	25.5342	25.4307	25.3572	30	15	25.4652	0.111279	0.00436986	Q14520	HABP2	1601	Hyaluronan-binding protein 2 [OS=Homo sapiens]
28.4541	28.5721	28.578	28.5717	28.71	28.8097	34	71	28.6159	0.124832	0.00436233	P11277	SPTB	1602	Isoform 2 of Spectrin beta chain, erythrocytic [OS=Homo sapiens]
21.1767	21.3115	21.2266	21.0369	21.2303	21.1554	6	12	21.1896	0.0922131	0.00435182	Q8NF50	DOCK8	1603	Dedicator of cytokinesis protein 8 [OS=Homo sapiens]
25.9445	26.2552	26.0355	26.1366	26.1861	26.0434	51	8	26.1002	0.113488	0.00434815	P61026	RAB10	1604	ras-related protein rab-10 [OS=Homo sapiens]
23.3421	23.2173	23.2543	23.2038	23.4737	23.3301	37	11	23.3035	0.100959	0.00433234	P12429	ANXA3	1605	annexin A3 [OS=Homo sapiens]
25.5106	25.4865	25.4331	25.3866	25.5405	25.706	43	18	25.5105	0.110482	0.00433083	Q9UJU6	DBNL	1606	Drebrin-like protein [OS=Homo sapiens]
19.7538	19.8425	19.8629	19.6368	19.6988	19.7424	4	1	19.7562	0.0855435	0.00432996	Q92882	OSTF1	1607	osteoclast-stimulating factor 1 [OS=Homo sapiens]
26.5016	26.6578	26.6683	26.8255	26.6779	26.538	46	11	26.6449	0.115222	0.00432437	P04899	GNAI2	1608	guanine nucleotide-binding protein G(i) subunit alpha-2 [OS=Homo sapiens]
28.4317	28.3002	28.193	28.2664	28.2041	28.4923	39	17	28.3146	0.122325	0.00432022	P11142	HSPA8	1609	Heat shock cognate 71 kDa protein [OS=Homo sapiens]
24.019	24.1846	24.0761	23.958	23.9469	23.8993	20	13	24.014	0.103696	0.00431816	Q07866	KLC1	1610	Isoform G of Kinesin light chain 1 [OS=Homo sapiens]
27.5538	27.6457	27.5948	27.5055	27.389	27.3425	28	5	27.5052	0.118397	0.00430455	P60953	CDC42	1611	Cell division control protein 42 homolog [OS=Homo sapiens]
28.4888	28.4427	28.4531	28.3865	28.3783	28.7119	50	7	28.4769	0.122451	0.00430001	P68366	TUBA4A	1612	Tubulin alpha-4A chain [OS=Homo sapiens]
25.3761	25.6913	25.6384	25.5178	25.5572	25.5928	18	1	25.5623	0.109592	0.00428726	Q92686	NRGN	1613	Neurogranin [OS=Homo sapiens]
24.7806	24.9649	24.8558	25.0081	25.0792	24.9324	32	7	24.9368	0.106911	0.00428725	P62826	RAN	1614	GTP-binding nuclear protein RAN [OS=Homo sapiens]
25.7661	26.0038	25.9242	26.0088	25.9903	25.7847	48	11	25.913	0.110972	0.00428249	Q15691	MAPRE1	1615	Microtubule-associated protein RP/EB family member 1 [OS=Homo sapiens]
23.4124	23.5379	23.3858	23.6557	23.4615	23.5522	17	14	23.5009	0.100613	0.00428123	Q14974	KPNB1	1616	Importin subunit beta-1 [OS=Homo sapiens]
24.1704	24.3582	24.4159	24.3319	24.3362	24.1659	60	9	24.2964	0.103797	0.00427209	P47755	CAPZA2	1617	F-actin-capping protein subunit alpha-2 [OS=Homo sapiens]
28.8745	28.992	28.7259	29.0101	28.9984	28.7787	56	42	28.8966	0.123196	0.00426334	P02787	TF	1618	Serotransferrin [OS=Homo sapiens]
26.1154	26.3518	26.1564	26.3777	26.2767	26.3573	39	13	26.2725	0.112001	0.00426304	O43866	CD5L	1619	CD5 antigen-like [OS=Homo sapiens]
23.5065	23.4898	23.5086	23.4638	23.3091	23.6174	13	10	23.4825	0.0999323	0.0042556	P11171	EPB41	1620	protein 4.1 [OS=Homo sapiens]
25.8716	25.8857	25.9594	25.8636	26.0238	25.698	28	17	25.8837	0.109918	0.0042466	Q01813	PFKP	1621	ATP-dependent 6-phosphofructokinase, platelet type [OS=Homo sapiens]
24.4188	24.3926	24.1375	24.3876	24.3694	24.3258	30	8	24.3386	0.103223	0.00424113	P25311	AZGP1	1622	Zinc-alpha-2-glycoprotein [OS=Homo sapiens]
26.9278	27.0301	26.9214	27.0429	26.796	27.1178	39	42	26.9727	0.114164	0.00423258	P08603	CFH	1623	complement factor H [OS=Homo sapiens]
24.8703	25.1695	24.9483	24.9769	25.0866	25.0268	12	4	25.013	0.105774	0.00422874	P51692	STAT5B	1624	Signal transducer and activator of transcription 5B [OS=Homo sapiens]
24.1012	24.1112	24.0581	24.0512	24.0792	24.3231	26	21	24.1207	0.101879	0.00422371	Q7KZF4	SND1	1625	staphylococcal nuclease domain-containing protein 1 [OS=Homo sapiens]
25.3883	25.2574	25.2024	25.31	25.425	25.4852	30	15	25.3447	0.106939	0.00421938	Q9UDY2	TJP2	1626	Tight junction protein ZO-2 [OS=Homo sapiens]
26.6556	26.5532	26.7374	26.4625	26.4723	26.4903	28	2	26.5619	0.111972	0.00421551	Q03591	CFHR1	1627	Complement factor H-related protein 1 [OS=Homo sapiens]
24.1101	24.1319	24.1302	24.2404	24.2339	24.3775	35	9	24.204	0.101783	0.00420521	P13804	ETFA	1628	Electron transfer flavoprotein subunit alpha, mitochondrial [OS=Homo sapiens]
24.041	24.2628	23.9889	24.0956	24.041	24.1738	5	4	24.1005	0.101266	0.00420182	Q99805	TM9SF2	1629	Transmembrane 9 superfamily member 2 [OS=Homo sapiens]
29.383	29.1951	29.1962	29.3381	29.4701	29.4646	7	25	29.3412	0.123262	0.00420098	P46939	UTRN	1630	Utrophin [OS=Homo sapiens]
24.0745	24.1547	24.2283	24.0357	24.1654	23.9492	18	14	24.1013	0.101224	0.00419994	P43652	AFM	1631	Afamin [OS=Homo sapiens]
20.9923	21.0711	20.9516	21.0297	21.1497	21.1763	15	2	21.0618	0.0882455	0.00418985	Q99576	TSC22D3	1632	Isoform 2 of TSC22 domain family protein 3 [OS=Homo sapiens]
25.9662	25.9599	25.9326	25.7131	25.7643	25.9118	21	12	25.8747	0.108303	0.00418567	P06744	GPI	1633	glucose-6-phosphate isomerase [OS=Homo sapiens]
25.8392	25.8117	25.6077	25.926	25.8068	25.733	22	4	25.7874	0.107815	0.00418093	P02763	ORM1	1634	Alpha-1-acid glycoprotein 1 [OS=Homo sapiens]
21.8917	21.9369	22.0953	21.9524	21.9793	22.1217	7	2	21.9962	0.0918739	0.00417681	P61073	CXCR4	1635	Isoform 2 of C-X-C chemokine receptor type 4 [OS=Homo sapiens]
25.9521	26.1331	26.2608	26.0378	26.082	26.1797	22	24	26.1076	0.108665	0.00416218	Q9Y613	FHOD1	1636	FH1/FH2 domain-containing protein 1 [OS=Homo sapiens]
24.563	24.7965	24.8126	24.7389	24.6652	24.6044	29	13	24.6968	0.102529	0.00415151	Q00013	MPP1	1637	55 kDa erythrocyte membrane protein [OS=Homo sapiens]
27.5295	27.2845	27.2959	27.2435	27.4026	27.4662	59	11	27.3704	0.113627	0.00415145	P61106	RAB14	1638	Ras-related protein Rab-14 [OS=Homo sapiens]
22.7153	22.9576	22.7829	22.8539	22.8326	22.952	37	6	22.849	0.094824	0.00415002	Q9NVJ2	ARL8B	1639	ADP-ribosylation factor-like protein 8B [OS=Homo sapiens]
24.1075	24.0571	23.9459	24.192	24.1001	24.2266	11	5	24.1049	0.0999912	0.00414817	P22792	CPN2	1640	Carboxypeptidase n subunit 2 [OS=Homo sapiens]
29.8004	29.6046	29.5216	29.6763	29.633	29.4473	49	7	29.6139	0.12281	0.00414705	P01860	IGHG3	1641	Immunoglobulin heavy constant gamma 3 [OS=Homo sapiens]
24.6534	24.4443	24.5989	24.6719	24.4621	24.4796	19	23	24.5517	0.101778	0.00414544	P29144	TPP2	1642	Tripeptidyl-peptidase 2 [OS=Homo sapiens]
24.3147	24.3673	24.4861	24.3503	24.4546	24.2051	42	8	24.363	0.100977	0.00414468	O95866	MPIG6B	1643	Isoform A of Megakaryocyte and platelet inhibitory receptor G6b [OS=Homo sapiens]
25.5071	25.5769	25.661	25.3679	25.4452	25.4524	33	23	25.5018	0.104453	0.00409591	P51659	HSD17B4	1644	peroxisomal multifunctional enzyme type 2 [OS=Homo sapiens]
24.6708	24.771	24.6272	24.9037	24.6602	24.7511	41	3	24.7307	0.101228	0.00409322	P01619	IGKV3-20	1645	Immunoglobulin kappa variable 3-20 [OS=Homo sapiens]
24.7458	24.8739	25.0135	24.9553	24.7858	24.8409	27	4	24.8692	0.10126	0.00407171	P63241	EIF5A	1646	Eukaryotic translation initiation factor 5A-1 [OS=Homo sapiens]
21.0628	21.2206	21.0365	21.0781	21.0942	20.9586	2	2	21.0751	0.0857358	0.0040681	Q9NTJ4	MAN2C1	1647	alpha-mannosidase 2C1 [OS=Homo sapiens]
23.8711	23.7991	23.9503	23.7392	23.7002	23.7258	39	8	23.7976	0.0967082	0.00406378	Q9Y2Q3	GSTK1	1648	Isoform 2 of Glutathione S-transferase kappa 1 [OS=Homo sapiens]
23.392	23.2704	23.2508	23.4918	23.4192	23.4279	25	10	23.3754	0.0949362	0.00406138	Q9BT78	COPS4	1649	COP9 signalosome complex subunit 4 [OS=Homo sapiens]
32.9948	33.0221	32.929	32.8035	32.776	33.1247	75	14	32.9417	0.133768	0.00406074	P60709	ACTB	1650	Actin, cytoplasmic 1 [OS=Homo sapiens]
21.4809	21.5641	21.4981	21.629	21.7034	21.5055	15	7	21.5635	0.0875595	0.00406054	P07093	SERPINE2	1651	Glia-derived nexin [OS=Homo sapiens]
28.8957	28.6569	28.8513	28.7663	28.9927	28.8949	61	12	28.843	0.11704	0.00405783	P23528	CFL1	1652	Cofilin-1 [OS=Homo sapiens]
25.8643	25.9657	25.8283	25.8956	25.7123	25.6996	25	18	25.8276	0.104615	0.0040505	P04843	RPN1	1653	Dolichyl-diphosphooligosaccharide--protein glycosyltransferase subunit 1 [OS=Homo sapiens]
24.2505	24.2592	24.3354	24.2742	24.1829	24.052	27	16	24.2257	0.0981063	0.00404968	P55084	HADHB	1654	Trifunctional enzyme subunit beta, mitochondrial [OS=Homo sapiens]
23.8619	23.8615	23.8451	23.6341	23.8125	23.7011	9	13	23.786	0.095853	0.0040298	Q96RT1	ERBIN	1655	Erbin [OS=Homo sapiens]
29.0476	28.7294	28.8381	28.786	28.7515	28.7864	44	48	28.8232	0.115993	0.00402429	P07996	THBS1	1656	thrombospondin-1 [OS=Homo sapiens]
24.4353	24.3675	24.4035	24.5875	24.5803	24.3882	14	66	24.4604	0.0982187	0.00401542	Q14204	DYNC1H1	1657	Cytoplasmic dynein 1 heavy chain 1 [OS=Homo sapiens]
26.4921	26.6714	26.4682	26.6733	26.6551	26.7247	25	18	26.6141	0.106661	0.00400769	O43182	ARHGAP6	1658	Rho GTPase-activating protein 6 [OS=Homo sapiens]
26.3591	26.3266	26.4165	26.4392	26.1791	26.4726	37	19	26.3655	0.105651	0.00400718	P10809	HSPD1	1659	60 kDa heat shock protein, mitochondrial [OS=Homo sapiens]
22.7602	22.9366	22.7973	22.891	22.7582	22.6924	36	10	22.8059	0.091266	0.00400185	Q9H425	C1orf198	1660	Uncharacterized protein C1orf198 [OS=Homo sapiens]
27.0464	27.0121	26.8402	27.1199	27.06	27.1435	50	8	27.037	0.107867	0.00398958	P01861	IGHG4	1661	Immunoglobulin heavy constant gamma 4 [OS=Homo sapiens]
24.6572	24.7504	24.7553	24.862	24.9425	24.804	18	16	24.7952	0.0988922	0.00398836	P22314	UBA1	1662	Ubiquitin-like modifier-activating enzyme 1 [OS=Homo sapiens]
22.6286	22.6853	22.6738	22.5411	22.4554	22.5419	20	5	22.5877	0.089864	0.00397845	P49721	PSMB2	1663	proteasome subunit beta type-2 [OS=Homo sapiens]
27.1338	27.1461	27.0311	27.3121	27.1162	27.2862	33	10	27.1709	0.107475	0.00395552	P00387	CYB5R3	1664	Isoform 2 of NADH-cytochrome b5 reductase 3 [OS=Homo sapiens]
21.9678	22.1557	22.0353	21.983	21.9146	21.9396	33	5	21.9993	0.086893	0.0039498	Q9UMX5	NENF	1665	Neudesin [OS=Homo sapiens]
27.4352	27.6649	27.7518	27.6865	27.6858	27.6462	70	8	27.6451	0.108821	0.00393636	P06702	S100A9	1666	Protein S100-A9 [OS=Homo sapiens]
25.5727	25.6069	25.7859	25.6729	25.8318	25.6615	29	16	25.6886	0.101049	0.00393361	P68104	EEF1A1	1667	Elongation factor 1-alpha 1 [OS=Homo sapiens]
22.1496	22.3421	22.1208	22.2621	22.2473	22.1409	22	6	22.2105	0.0871025	0.00392169	P25789	PSMA4	1668	Proteasome subunit alpha type-4 [OS=Homo sapiens]
24.1224	24.0215	23.9256	24.148	24.1233	23.9607	27	11	24.0503	0.0943114	0.00392143	P09543	CNP	1669	2',3'-cyclic-nucleotide 3'-phosphodiesterase [OS=Homo sapiens]
25.3286	25.4535	25.409	25.4866	25.4662	25.228	27	11	25.3953	0.0993804	0.00391334	P19086	GNAZ	1670	guanine nucleotide-binding protein G(z) subunit alpha [OS=Homo sapiens]
28.5009	28.5396	28.3413	28.6581	28.5653	28.6221	39	4	28.5379	0.111643	0.00391209	P02652	APOA2	1671	Apolipoprotein A-II [OS=Homo sapiens]
27.7019	27.521	27.6534	27.5433	27.4935	27.4087	58	4	27.5536	0.10744	0.0038993	P61224	RAP1B	1672	Isoform 3 of Ras-related protein Rap-1b [OS=Homo sapiens]
29.2241	29.2846	29.2715	29.4043	29.2919	29.057	49	83	29.2556	0.113975	0.00389583	P01024	C3	1673	Complement C3 [OS=Homo sapiens]
28.5881	28.5037	28.7078	28.7802	28.6651	28.5105	43	3	28.6259	0.111089	0.00388073	P68371	TUBB4B	1674	Tubulin beta-4B chain [OS=Homo sapiens]
24.2268	24.3917	24.2539	24.419	24.2548	24.4335	3	10	24.3299	0.0943895	0.00387956	Q6ZQQ6	WDR87	1675	WD repeat-containing protein 87 [OS=Homo sapiens]
27.1877	27.3742	27.284	27.1645	27.2607	27.4382	37	8	27.2849	0.105805	0.00387779	P14618	PKM	1676	Pyruvate kinase PKM [OS=Homo sapiens]
22.7052	22.648	22.7215	22.7226	22.4908	22.6467	1	4	22.6558	0.0878381	0.00387707	O94915	FRYL	1677	protein furry homolog-like [OS=Homo sapiens]
25.8619	25.8291	25.9411	25.9693	26.0801	25.8184	14	17	25.9166	0.100398	0.00387387	O60610	DIAPH1	1678	Protein diaphanous homolog 1 [OS=Homo sapiens]
23.5274	23.4821	23.3551	23.5228	23.6191	23.5758	10	8	23.5137	0.090964	0.00386855	Q6PJW8	CNST	1679	Consortin [OS=Homo sapiens]
25.2547	25.3341	25.275	25.2439	25.3028	25.5081	26	28	25.3198	0.0979446	0.00386831	Q9Y6C2	EMILIN1	1680	EMILIN-1 [OS=Homo sapiens]
31.9517	31.8954	32.0403	32.05	32.1516	32.2314	76	26	32.0534	0.123973	0.00386771	P02647	APOA1	1681	Apolipoprotein A-I [OS=Homo sapiens]
22.0159	21.9753	21.9944	22.0531	21.8153	22.0261	17	4	21.98	0.0849966	0.00386699	O75608	LYPLA1	1682	Acyl-protein thioesterase 1 [OS=Homo sapiens]
24.2804	24.4806	24.4761	24.3479	24.2677	24.4173	51	12	24.3783	0.0941188	0.00386075	Q06323	PSME1	1683	Isoform 2 of Proteasome activator complex subunit 1 [OS=Homo sapiens]
28.9614	29.2943	29.0419	29.0931	29.1488	29.1307	31	9	29.1117	0.112163	0.00385284	P02765	AHSG	1684	Alpha-2-HS-glycoprotein [OS=Homo sapiens]
23.4627	23.4939	23.3619	23.5206	23.3391	23.3039	8	7	23.4137	0.0900766	0.00384718	Q8TDZ2	MICAL1	1685	[F-actin]-monooxygenase MICAL1 [OS=Homo sapiens]
25.4125	25.484	25.3269	25.4232	25.3951	25.6127	17	4	25.4424	0.0975361	0.0038336	O00264	PGRMC1	1686	Membrane-associated progesterone receptor component 1 [OS=Homo sapiens]
26.8608	27.0082	27.0842	27.1497	26.9943	26.9334	27	14	27.0051	0.103215	0.00382206	O14791	APOL1	1687	Isoform 2 of Apolipoprotein L1 [OS=Homo sapiens]
25.693	25.8703	25.855	25.9478	25.7572	25.7246	35	23	25.808	0.0983917	0.00381245	Q8N392	ARHGAP18	1688	Rho GTPase-activating protein 18 [OS=Homo sapiens]
24.8022	24.7049	24.9492	24.7351	24.8703	24.8902	32	16	24.8254	0.0946134	0.00381116	P50991	CCT4	1689	T-complex protein 1 subunit delta [OS=Homo sapiens]
23.5702	23.6033	23.4521	23.6941	23.5398	23.4684	17	11	23.5547	0.0896862	0.00380758	Q96G03	PGM2	1690	Phosphoglucomutase-2 [OS=Homo sapiens]
27.4619	27.4785	27.5509	27.7071	27.6255	27.4415	20	14	27.5442	0.104718	0.00380181	Q14155	ARHGEF7	1691	Isoform 1 of Rho guanine nucleotide exchange factor 7 [OS=Homo sapiens]
27.3043	27.5424	27.4177	27.4886	27.5819	27.3825	30	14	27.4529	0.104104	0.00379209	P07900	HSP90AA1	1692	Isoform 2 of Heat shock protein HSP 90-alpha [OS=Homo sapiens]
23.6788	23.6795	23.8864	23.764	23.6369	23.6944	26	11	23.7233	0.0899334	0.00379093	Q9UQ80	PA2G4	1693	proliferation-associated protein 2G4 [OS=Homo sapiens]
24.1502	24.3306	24.3056	24.1354	24.1201	24.2424	14	26	24.2141	0.0915153	0.00377943	Q01082	SPTBN1	1694	Spectrin beta chain, non-erythrocytic 1 [OS=Homo sapiens]
24.4574	24.69	24.535	24.5891	24.4585	24.6179	26	10	24.558	0.0922368	0.00375588	P31930	UQCRC1	1695	Cytochrome b-c1 complex subunit 1, mitochondrial [OS=Homo sapiens]
19.7416	19.5638	19.6016	19.5869	19.7207	19.6276	13	2	19.6404	0.0736001	0.00374739	P03950	ANG	1696	angiogenin [OS=Homo sapiens]
27.4293	27.5631	27.5828	27.5554	27.4472	27.3186	21	51	27.4827	0.102764	0.00373922	P04275	VWF	1697	Von Willebrand factor [OS=Homo sapiens]
30.9182	30.7367	30.8649	30.828	30.5903	30.7824	72	5	30.7868	0.115044	0.0037368	P02656	APOC3	1698	Apolipoprotein C-III [OS=Homo sapiens]
26.7292	26.8534	26.8304	26.911	26.7237	26.9777	16	8	26.8375	0.100039	0.00372759	P13224	GP1BB	1699	Isoform 2 of Platelet glycoprotein Ib beta chain [OS=Homo sapiens]
25.71	25.9052	25.9144	25.9219	25.7383	25.7852	40	19	25.8292	0.0959488	0.00371475	Q9H939	PSTPIP2	1700	Proline-serine-threonine phosphatase-interacting protein 2 [OS=Homo sapiens]
25.027	24.9058	24.7756	24.8518	24.788	24.8912	28	8	24.8732	0.0919859	0.00369819	P04632	CAPNS1	1701	Calpain small subunit 1 [OS=Homo sapiens]
27.8058	27.8533	28.008	27.9885	27.9303	27.7505	9	17	27.8894	0.103091	0.0036964	Q9Y4I1	MYO5A	1702	Unconventional myosin-Va [OS=Homo sapiens]
19.2075	19.1333	19.1604	19.1039	19.0964	19.2819	5	1	19.1639	0.0706116	0.00368461	Q07021	C1QBP	1703	Complement component 1 Q subcomponent-binding protein, mitochondrial [OS=Homo sapiens]
19.8301	19.7693	19.8288	19.9562	19.9378	19.8231	1	1	19.8576	0.0731054	0.00368149	O75891	ALDH1L1	1704	Cytosolic 10-formyltetrahydrofolate dehydrogenase [OS=Homo sapiens]
25.9451	26.1647	26.1234	26.1129	25.9448	26.0185	36	17	26.0516	0.0954486	0.00366383	P00734	F2	1705	Prothrombin [OS=Homo sapiens]
26.427	26.4305	26.4533	26.4839	26.3572	26.6439	31	4	26.466	0.0966897	0.00365336	P63000	RAC1	1706	Ras-related C3 botulinum toxin substrate 1 [OS=Homo sapiens]
23.4819	23.5569	23.5465	23.6802	23.6955	23.6539	37	8	23.6025	0.0861382	0.00364954	P60900	PSMA6	1707	Proteasome subunit alpha type-6 [OS=Homo sapiens]
25.8248	26.0459	26.0145	26.0514	25.9908	25.8763	34	20	25.9673	0.0944677	0.00363795	P31948	STIP1	1708	Isoform 2 of Stress-induced-phosphoprotein 1 [OS=Homo sapiens]
23.5997	23.8491	23.743	23.7886	23.7956	23.7148	24	3	23.7485	0.0863019	0.003634	P18085	ARF4	1709	ADP-ribosylation factor 4 [OS=Homo sapiens]
24.3477	24.4281	24.5835	24.3879	24.3611	24.3676	27	19	24.4127	0.0882702	0.00361575	Q99798	ACO2	1710	Aconitate hydratase, mitochondrial [OS=Homo sapiens]
24.9756	24.7536	24.8799	24.7407	24.788	24.7923	29	16	24.8217	0.0897426	0.00361549	O60749	SNX2	1711	Sorting nexin-2 [OS=Homo sapiens]
27.1236	27.321	27.1571	27.3734	27.2243	27.1778	35	21	27.2295	0.0982231	0.00360723	P03952	KLKB1	1712	Plasma kallikrein [OS=Homo sapiens]
22.3806	22.3725	22.1961	22.3982	22.4148	22.3838	7	5	22.3577	0.0805436	0.0036025	Q99501	GAS2L1	1713	GAS2-like protein 1 [OS=Homo sapiens]
24.4184	24.1921	24.2597	24.2558	24.1707	24.2431	17	8	24.2566	0.0870799	0.00358994	Q9Y394	DHRS7	1714	Dehydrogenase/reductase SDR family member 7 [OS=Homo sapiens]
23.8106	23.7326	23.7378	23.8254	23.8943	23.652	18	9	23.7755	0.0852545	0.00358582	Q9P2R7	SUCLA2	1715	Succinate--CoA ligase [ADP-forming] subunit beta, mitochondrial [OS=Homo sapiens]
19.9307	20.0011	19.8515	19.9347	20.0253	19.8574	9	6	19.9334	0.0714259	0.00358322	O43252	PAPSS1	1716	bifunctional 3'-phosphoadenosine 5'-phosphosulfate synthase 1 [OS=Homo sapiens]
24.3441	24.2933	24.2477	24.2251	24.1773	24.4178	33	26	24.2842	0.0869363	0.00357995	Q9Y6F6	IRAG1	1717	Isoform 7 of Protein MRVI1 [OS=Homo sapiens]
26.6134	26.4975	26.6273	26.6071	26.6193	26.3934	23	5	26.5597	0.0946229	0.00356266	P30048	PRDX3	1718	Thioredoxin-dependent peroxide reductase, mitochondrial [OS=Homo sapiens]
23.3353	23.3057	23.4334	23.2401	23.2765	23.1941	28	5	23.2975	0.0829292	0.00355957	O60493	SNX3	1719	sorting nexin-3 [OS=Homo sapiens]
26.4992	26.6007	26.7009	26.65	26.6551	26.4623	38	22	26.5947	0.094509	0.00355368	P24557	TBXAS1	1720	Thromboxane-A synthase [OS=Homo sapiens]
26.1515	26.1018	25.9261	26.1034	25.9988	26.1602	27	16	26.0736	0.0923119	0.00354043	P18054	ALOX12	1721	Arachidonate 12-lipoxygenase, 12S-type [OS=Homo sapiens]
25.0327	25.1042	25.1385	25.0248	25.0268	24.8814	27	11	25.0347	0.088614	0.00353964	O94919	ENDOD1	1722	endonuclease domain-containing 1 protein [OS=Homo sapiens]
23.679	23.4842	23.6768	23.507	23.62	23.6092	16	5	23.596	0.0831624	0.00352442	Q8N699	MYCT1	1723	Myc target protein 1 [OS=Homo sapiens]
25.1376	25.1013	25.2303	25.1847	25.2275	25.3547	38	12	25.206	0.0886077	0.00351534	Q9BX67	JAM3	1724	Junctional adhesion molecule C [OS=Homo sapiens]
25.2953	25.2029	25.2286	25.3061	25.0619	25.2426	12	16	25.2229	0.0882077	0.00349712	Q9C0C9	UBE2O	1725	(E3-independent) E2 ubiquitin-conjugating enzyme [OS=Homo sapiens]
24.282	24.1005	24.2036	24.0879	24.2188	24.279	26	4	24.1953	0.0844615	0.00349082	Q99719	SEPTIN5	1726	Septin-5 [OS=Homo sapiens]
27.0579	27.2341	27.0462	27.0433	26.949	27.0213	45	15	27.0586	0.0944417	0.00349026	P50552	VASP	1727	Vasodilator-stimulated phosphoprotein [OS=Homo sapiens]
25.3384	25.4362	25.4267	25.5585	25.4852	25.5744	33	3	25.4699	0.088636	0.00348003	P30273	FCER1G	1728	High affinity immunoglobulin epsilon receptor subunit gamma [OS=Homo sapiens]
24.997	24.9658	25.1567	25.1452	24.9671	25.0783	14	4	25.0517	0.0871787	0.00347995	P35613	BSG	1729	Basigin [OS=Homo sapiens]
25.987	26.1604	25.9967	25.9764	25.9377	25.8957	43	4	25.9923	0.0904037	0.00347809	P31946	YWHAB	1730	14-3-3 protein beta/alpha [OS=Homo sapiens]
24.4902	24.3116	24.4514	24.4907	24.5579	24.5171	30	10	24.4698	0.0851058	0.00347799	Q6Q788	APOA5	1731	Apolipoprotein A-V [OS=Homo sapiens]
25.0493	25.1907	25.2671	25.284	25.212	25.2674	30	22	25.2117	0.0874451	0.00346843	P40939	HADHA	1732	Trifunctional enzyme subunit alpha, mitochondrial [OS=Homo sapiens]
26.4666	26.1939	26.4091	26.3401	26.34	26.3606	49	13	26.3517	0.0913854	0.00346791	P47756	CAPZB	1733	Isoform 2 of F-actin-capping protein subunit beta [OS=Homo sapiens]
24.9166	24.8359	24.8722	24.8793	24.6803	24.7782	11	10	24.8271	0.0857825	0.0034552	P45974	USP5	1734	Ubiquitin carboxyl-terminal hydrolase 5 [OS=Homo sapiens]
27.1478	27.2426	27.1594	27.192	27.0439	26.9929	28	8	27.1298	0.093711	0.00345417	P27169	PON1	1735	Serum paraoxonase/arylesterase 1 [OS=Homo sapiens]
19.7216	19.8098	19.7245	19.7157	19.6104	19.6575	2	1	19.7066	0.067732	0.00343703	O75683	SURF6	1736	Surfeit locus protein 6 [OS=Homo sapiens]
24.008	24.028	23.9191	24.0716	24.1685	24.0502	19	16	24.0409	0.0817374	0.00339993	O60763	USO1	1737	Isoform 2 of General vesicular transport factor p115 [OS=Homo sapiens]
24.14	24.1108	24.2043	24.3401	24.1452	24.2059	5	2	24.1911	0.0821706	0.00339673	Q08722	CD47	1738	Leukocyte surface antigen CD47 [OS=Homo sapiens]
24.8501	24.9064	24.6661	24.8095	24.7666	24.8546	23	16	24.8089	0.0842356	0.00339538	P50416	CPT1A	1739	Carnitine O-palmitoyltransferase 1, liver isoform [OS=Homo sapiens]
25.6406	25.6981	25.6605	25.8411	25.8008	25.6374	4	26	25.7131	0.0872564	0.00339347	Q5T4S7	UBR4	1740	e3 ubiquitin-protein ligase UBR4 [OS=Homo sapiens]
22.6608	22.7473	22.5265	22.7006	22.7017	22.7023	37	13	22.6732	0.076929	0.00339295	P50453	SERPINB9	1741	Serpin B9 [OS=Homo sapiens]
26.6444	26.8935	26.6975	26.7874	26.6792	26.733	39	26	26.7392	0.0899872	0.00336537	P16284	PECAM1	1742	Platelet endothelial cell adhesion molecule [OS=Homo sapiens]
25.8226	25.8077	25.6838	25.9013	25.8745	25.9247	28	6	25.8358	0.0868963	0.00336341	Q13103	SPP2	1743	Secreted phosphoprotein 24 [OS=Homo sapiens]
29.3077	29.2017	29.3518	29.2546	29.3179	29.4897	29	17	29.3206	0.098233	0.00335031	P01042	KNG1	1744	kininogen-1 [OS=Homo sapiens]
23.7568	23.7004	23.7304	23.5418	23.6919	23.7445	14	10	23.6943	0.0787859	0.0033251	Q9Y678	COPG1	1745	Coatomer subunit gamma-1 [OS=Homo sapiens]
27.1348	26.9984	27.0571	27.1108	27.1593	27.2611	20	9	27.1202	0.089982	0.00331789	P0DMV8	HSPA1A	1746	heat shock 70 kDa protein 1A [OS=Homo sapiens]
26.5355	26.4121	26.383	26.385	26.5556	26.345	35	15	26.436	0.087706	0.00331767	P01011	SERPINA3	1747	Alpha-1-antichymotrypsin [OS=Homo sapiens]
25.2223	25.2995	25.3016	25.2336	25.1832	25.4195	49	8	25.2766	0.0837794	0.0033145	Q15365	PCBP1	1748	Poly(RC)-binding protein 1 [OS=Homo sapiens]
24.0134	24.14	24.1447	24.0636	23.9414	24.1093	38	8	24.0687	0.0797526	0.00331354	P01892	HLA-A	1749	HLA class I histocompatibility antigen, A-2 alpha chain [OS=Homo sapiens]
23.7472	23.741	23.7041	23.8122	23.5924	23.793	31	6	23.7317	0.0784096	0.00330401	Q99714	HSD17B10	1750	3-hydroxyacyl-CoA dehydrogenase type-2 [OS=Homo sapiens]
24.44	24.4399	24.5611	24.425	24.3092	24.4641	18	6	24.4399	0.080743	0.00330374	P0C7P4	UQCRFS1P1	1751	Putative cytochrome b-c1 complex subunit Rieske-like protein 1 [OS=Homo sapiens]
29.5446	29.5981	29.4378	29.7226	29.6557	29.611	29	40	29.595	0.0974469	0.00329268	Q14766	LTBP1	1752	Isoform 4 of Latent-transforming growth factor beta-binding protein 1 [OS=Homo sapiens]
23.5709	23.6015	23.449	23.6372	23.6598	23.6421	5	15	23.5934	0.0776362	0.00329058	P12111	COL6A3	1753	Isoform 2 of Collagen alpha-3(VI) chain [OS=Homo sapiens]
26.5012	26.5218	26.4649	26.6307	26.6011	26.3943	29	26	26.519	0.0872022	0.00328829	P19367	HK1	1754	Hexokinase-1 [OS=Homo sapiens]
27.0229	26.9684	26.9811	27.0122	27.158	26.8889	28	26	27.0053	0.0885226	0.00327798	O76074	PDE5A	1755	cGMP-specific 3',5'-cyclic phosphodiesterase [OS=Homo sapiens]
19.8722	19.7252	19.7591	19.7665	19.7321	19.6797	7	3	19.7558	0.0647519	0.00327761	Q9NWZ3	IRAK4	1756	Interleukin-1 receptor-associated kinase 4 [OS=Homo sapiens]
24.9209	25.0361	25.1238	25.0521	25.1348	25.1241	33	6	25.0653	0.081961	0.0032699	P84077	ARF1	1757	ADP-ribosylation factor 1 [OS=Homo sapiens]
26.4389	26.5192	26.4758	26.4445	26.3483	26.2867	23	18	26.4189	0.0858176	0.00324834	P02730	SLC4A1	1758	Band 3 anion transport protein [OS=Homo sapiens]
30.5572	30.3549	30.4341	30.3599	30.4816	30.5888	8	6	30.4627	0.098188	0.00322322	O00712	NFIB	1759	Isoform 4 of Nuclear factor 1 B-type [OS=Homo sapiens]
25.9016	25.8113	25.9341	25.803	25.9663	25.7591	39	13	25.8626	0.0828054	0.00320175	O15144	ARPC2	1760	Actin-related protein 2/3 complex subunit 2 [OS=Homo sapiens]
26.5726	26.7406	26.657	26.6477	26.515	26.5413	31	17	26.6124	0.0846256	0.00317994	Q16643	DBN1	1761	Isoform 3 of Drebrin [OS=Homo sapiens]
25.4327	25.426	25.4596	25.5964	25.4452	25.5943	26	12	25.4924	0.0805688	0.0031605	P23219	PTGS1	1762	Prostaglandin G/H synthase 1 [OS=Homo sapiens]
24.1868	24.0343	24.235	24.098	24.2164	24.151	14	8	24.1536	0.0761841	0.00315415	Q13045	FLII	1763	protein flightless-1 homolog [OS=Homo sapiens]
23.5886	23.7288	23.6669	23.6834	23.7962	23.6219	29	10	23.681	0.0745431	0.00314781	O43639	NCK2	1764	Cytoplasmic protein NCK2 [OS=Homo sapiens]
27.5847	27.583	27.5179	27.4577	27.3916	27.4006	44	15	27.4893	0.086143	0.0031337	P07195	LDHB	1765	L-lactate dehydrogenase B chain [OS=Homo sapiens]
24.9386	24.8871	24.8877	24.9323	24.9618	25.0983	24	7	24.951	0.0779737	0.00312507	P25325	MPST	1766	3-mercaptopyruvate sulfurtransferase [OS=Homo sapiens]
23.3583	23.2582	23.3792	23.3031	23.1844	23.2524	14	6	23.2893	0.072601	0.00311736	P07339	CTSD	1767	Cathepsin D [OS=Homo sapiens]
24.9458	25.0736	24.9594	24.9675	24.9029	24.8397	18	10	24.9481	0.0775405	0.00310807	P15170	GSPT1	1768	Eukaryotic peptide chain release factor GTP-binding subunit ERF3A [OS=Homo sapiens]
29.8375	29.9242	29.9149	29.8463	29.6864	29.7548	56	5	29.8273	0.0923301	0.00309548	P02655	APOC2	1769	Apolipoprotein C-II [OS=Homo sapiens]
28.0642	28.0949	28.0061	28.0924	28.2054	28.2326	24	15	28.1159	0.0864217	0.00307376	P07359	GP1BA	1770	Platelet glycoprotein Ib alpha chain [OS=Homo sapiens]
29.6773	29.804	29.7344	29.7731	29.7256	29.5457	27	10	29.71	0.0913207	0.00307373	P0C0L5	C4B	1771	Complement C4-B [OS=Homo sapiens]
26.9237	26.9457	27.0116	26.7888	26.8501	26.8332	51	19	26.8922	0.0825106	0.0030682	P00558	PGK1	1772	phosphoglycerate kinase 1 [OS=Homo sapiens]
23.9859	23.9724	24.0769	24.0625	23.9694	23.875	14	8	23.9904	0.0731922	0.0030509	P07357	C8A	1773	Complement component C8 alpha chain [OS=Homo sapiens]
26.6854	26.5235	26.6108	26.702	26.6583	26.7563	37	22	26.656	0.0808193	0.00303193	Q15833	STXBP2	1774	Syntaxin-binding protein 2 [OS=Homo sapiens]
25.8562	26.031	26.0335	26.0555	25.9911	25.9139	30	7	25.9802	0.0787056	0.00302945	P00491	PNP	1775	purine nucleoside phosphorylase [OS=Homo sapiens]
25.4464	25.3478	25.4516	25.2904	25.3614	25.4919	33	15	25.3982	0.0767692	0.00302262	P52209	PGD	1776	6-phosphogluconate dehydrogenase, decarboxylating [OS=Homo sapiens]
25.029	25.0592	25.0543	25.159	25.2115	25.0346	50	5	25.0913	0.0755187	0.00300976	P20340	RAB6A	1777	Ras-related protein Rab-6A [OS=Homo sapiens]
24.336	24.3756	24.4545	24.3237	24.2402	24.3996	40	11	24.3549	0.0732703	0.00300844	P45880	VDAC2	1778	Isoform 1 of Voltage-dependent anion-selective channel protein 2 [OS=Homo sapiens]
28.1637	27.983	28.1513	28.1786	28.2337	28.1458	54	3	28.1427	0.0844009	0.00299904	P09493	TPM1	1779	Isoform 8 of Tropomyosin alpha-1 chain [OS=Homo sapiens]
29.7979	29.9989	29.9619	30.0207	30.0214	29.8843	59	11	29.9475	0.0894937	0.00298835	P37802	TAGLN2	1780	Transgelin-2 [OS=Homo sapiens]
27.3065	27.1962	27.1673	27.2577	27.1969	27.0688	22	6	27.1989	0.0811864	0.00298491	P46109	CRKL	1781	Crk-like protein [OS=Homo sapiens]
20.5981	20.6033	20.5497	20.7243	20.6134	20.67	19	4	20.6265	0.0614405	0.00297872	P22352	GPX3	1782	Glutathione peroxidase 3 [OS=Homo sapiens]
29.2404	29.4497	29.2776	29.4209	29.3304	29.2609	76	12	29.33	0.0873416	0.0029779	P07737	PFN1	1783	profilin-1 [OS=Homo sapiens]
26.8213	26.853	26.8746	26.6971	26.718	26.7087	42	21	26.7788	0.0797167	0.00297686	P50990	CCT8	1784	T-complex protein 1 subunit theta [OS=Homo sapiens]
25.597	25.7818	25.7027	25.6649	25.6217	25.772	47	14	25.69	0.0764703	0.00297665	O15143	ARPC1B	1785	Actin-related protein 2/3 complex subunit 1B [OS=Homo sapiens]
27.2852	27.176	27.1539	27.2449	27.155	27.3526	27	19	27.2279	0.0807781	0.00296674	P16109	SELP	1786	P-selectin [OS=Homo sapiens]
27.4767	27.588	27.5617	27.6606	27.708	27.6385	51	25	27.6056	0.0817887	0.00296276	Q14247	CTTN	1787	Src substrate cortactin [OS=Homo sapiens]
25.4031	25.2769	25.4351	25.3724	25.3715	25.2414	21	9	25.3501	0.0750323	0.00295984	Q00325	SLC25A3	1788	Phosphate carrier protein, mitochondrial [OS=Homo sapiens]
25.4646	25.5938	25.4754	25.4196	25.3844	25.4082	84	15	25.4576	0.0750568	0.0029483	P52907	CAPZA1	1789	F-actin-capping protein subunit alpha-1 [OS=Homo sapiens]
25.8268	26.0312	25.9658	25.8821	25.9104	25.9964	26	8	25.9355	0.0762528	0.0029401	Q9Y6E0	STK24	1790	Serine/threonine-protein kinase 24 [OS=Homo sapiens]
25.442	25.2479	25.4428	25.4175	25.4164	25.419	26	6	25.3976	0.0743545	0.00292762	P11234	RALB	1791	Isoform 2 of Ras-related protein Ral-B [OS=Homo sapiens]
24.3216	24.4383	24.3627	24.2497	24.2567	24.3445	15	8	24.3289	0.070578	0.00290099	Q14162	SCARF1	1792	Scavenger receptor class F member 1 [OS=Homo sapiens]
29.182	29.3999	29.3375	29.2012	29.2381	29.3082	82	6	29.2778	0.0848776	0.00289904	P68871	HBB	1793	Hemoglobin subunit beta [OS=Homo sapiens]
24.337	24.2352	24.3156	24.4279	24.4153	24.337	18	4	24.3447	0.0705099	0.00289632	P22061	PCMT1	1794	protein-L-isoaspartate(D-aspartate) O-methyltransferase [OS=Homo sapiens]
25.4789	25.5144	25.3946	25.5662	25.5453	25.6045	13	12	25.5173	0.073899	0.00289603	Q6P3W7	SCYL2	1795	SCY1-like protein 2 [OS=Homo sapiens]
25.8367	25.9843	25.8891	26.026	26.0182	25.9505	41	16	25.9508	0.0750431	0.00289174	P12931	SRC	1796	Proto-oncogene tyrosine-protein kinase Src [OS=Homo sapiens]
29.5944	29.5867	29.4969	29.7341	29.6597	29.6925	45	21	29.6274	0.0853719	0.00288152	P01871	IGHM	1797	immunoglobulin heavy constant mu [OS=Homo sapiens]
26.0408	25.9769	25.8616	26.0379	26.021	25.9068	34	11	25.9742	0.0747394	0.00287745	Q9NYL9	TMOD3	1798	tropomodulin-3 [OS=Homo sapiens]
27.5537	27.7049	27.6026	27.5474	27.5637	27.4633	50	21	27.5726	0.0792541	0.00287438	P06733	ENO1	1799	alpha-enolase [OS=Homo sapiens]
24.6019	24.5403	24.5884	24.4617	24.6279	24.6609	5	3	24.5802	0.0706471	0.00287415	O95573	ACSL3	1800	long-chain-fatty-acid--CoA ligase 3 [OS=Homo sapiens]
24.3841	24.5243	24.3417	24.4108	24.4651	24.4971	7	2	24.4372	0.0701199	0.00286939	Q13790	APOF	1801	Apolipoprotein F [OS=Homo sapiens]
27.9313	27.9102	27.873	27.961	27.9156	28.1015	44	28	27.9488	0.080144	0.00286753	P11021	HSPA5	1802	78 kDa glucose-regulated protein [OS=Homo sapiens]
26.5533	26.6158	26.4589	26.673	26.5179	26.6008	22	22	26.57	0.0761363	0.0028655	Q01433	AMPD2	1803	AMP deaminase 2 [OS=Homo sapiens]
32.4478	32.2381	32.4313	32.2927	32.4169	32.4611	60	119	32.3813	0.0926468	0.00286112	Q9Y490	TLN1	1804	Talin-1 [OS=Homo sapiens]
26.1249	26.158	26.2282	26.2898	26.1346	26.0872	67	7	26.1705	0.0748741	0.00286102	O15511	ARPC5	1805	Actin-related protein 2/3 complex subunit 5 [OS=Homo sapiens]
25.3183	25.4198	25.4891	25.4561	25.3248	25.4515	22	8	25.4099	0.0719179	0.0028303	P11310	ACADM	1806	Isoform 2 of Medium-chain specific acyl-CoA dehydrogenase, mitochondrial [OS=Homo sapiens]
30.675	30.8404	30.7076	30.7369	30.7746	30.5868	63	15	30.7202	0.086804	0.00282563	P06753	TPM3	1807	Isoform 2 of Tropomyosin alpha-3 chain [OS=Homo sapiens]
27.2176	27.4028	27.2895	27.3723	27.3211	27.2196	38	16	27.3038	0.0768448	0.00281443	P61160	ACTR2	1808	Actin-related protein 2 [OS=Homo sapiens]
25.4396	25.2631	25.3116	25.4073	25.4353	25.3707	34	17	25.3713	0.0711459	0.00280419	P29350	PTPN6	1809	Isoform 2 of Tyrosine-protein phosphatase non-receptor type 6 [OS=Homo sapiens]
24.9637	25.1276	24.9934	25.1287	25.0058	25.0403	32	18	25.0433	0.0701927	0.00280286	Q14677	CLINT1	1810	Isoform 3 of Clathrin interactor 1 [OS=Homo sapiens]
27.5533	27.3463	27.4858	27.4157	27.3694	27.448	18	14	27.4364	0.0765258	0.00278921	P50851	LRBA	1811	Isoform 2 of Lipopolysaccharide-responsive and beige-like anchor protein [OS=Homo sapiens]
24.865	25.0143	24.9726	25.05	25.0277	24.9286	40	5	24.9764	0.0695686	0.00278537	Q14019	COTL1	1812	coactosin-like protein [OS=Homo sapiens]
21.7331	21.7102	21.6614	21.7521	21.5875	21.6583	4	5	21.6838	0.060385	0.0027848	B0I1T2	MYO1G	1813	unconventional myosin-Ig [OS=Homo sapiens]
22.147	22.1996	22.2467	22.1388	22.2371	22.2981	33	5	22.2112	0.0616201	0.00277428	Q9HBL7	PLGRKT	1814	Plasminogen receptor (KT) [OS=Homo sapiens]
27.8896	27.7776	27.6911	27.8063	27.7948	27.6855	38	29	27.7742	0.0768907	0.00276843	Q5JSH3	WDR44	1815	WD repeat-containing protein 44 [OS=Homo sapiens]
21.7197	21.5651	21.7273	21.707	21.6655	21.6721	6	4	21.6761	0.0598944	0.00276315	Q8N5J2	MINDY1	1816	Isoform 3 of Ubiquitin carboxyl-terminal hydrolase MINDY-1 [OS=Homo sapiens]
27.293	27.1277	27.3141	27.2213	27.2803	27.3279	34	36	27.2607	0.0748948	0.00274735	P23229	ITGA6	1817	Isoform Alpha-6X1X2A of Integrin alpha-6 [OS=Homo sapiens]
27.5448	27.641	27.6839	27.5824	27.5723	27.4664	25	55	27.5818	0.075766	0.00274696	P12259	F5	1818	Coagulation factor V [OS=Homo sapiens]
27.4892	27.5763	27.474	27.4556	27.3415	27.4604	37	13	27.4662	0.075397	0.00274508	P48059	LIMS1	1819	LIM and senescent cell antigen-like-containing domain protein 1 [OS=Homo sapiens]
25.9135	26.0657	25.9036	25.8731	25.9659	25.8906	27	12	25.9354	0.0711116	0.00274188	Q16181	SEPTIN7	1820	Septin-7 [OS=Homo sapiens]
23.1263	23.2102	23.0508	23.0928	23.05	23.1583	3	2	23.1147	0.0630913	0.00272948	O95674	CDS2	1821	phosphatidate cytidylyltransferase 2 [OS=Homo sapiens]
24.2069	24.3765	24.3064	24.2071	24.3087	24.2999	41	13	24.2843	0.0659946	0.00271759	O14745	SLC9A3R1	1822	Na(+)/H(+) exchange regulatory cofactor NHE-RF1 [OS=Homo sapiens]
31.5319	31.7193	31.563	31.7196	31.7163	31.6094	77	47	31.6432	0.085949	0.00271619	P02675	FGB	1823	Fibrinogen beta chain [OS=Homo sapiens]
21.8618	21.9653	21.8264	21.8897	21.9102	21.8016	20	5	21.8758	0.0591989	0.00270613	Q9UEU0	VTI1B	1824	vesicle transport through interaction with t-SNAREs homolog 1B [OS=Homo sapiens]
25.6836	25.644	25.633	25.7162	25.7524	25.5555	22	9	25.6641	0.0693607	0.00270263	P50502	ST13	1825	Hsc70-interacting protein [OS=Homo sapiens]
22.1201	22.235	22.1657	22.1026	22.1209	22.2356	24	5	22.1633	0.0595422	0.00268652	P06730	EIF4E	1826	Eukaryotic translation initiation factor 4E [OS=Homo sapiens]
24.2796	24.3949	24.3526	24.4007	24.3489	24.4754	9	8	24.3754	0.0654626	0.0026856	Q8TD19	NEK9	1827	Serine/threonine-protein kinase Nek9 [OS=Homo sapiens]
24.1222	24.0216	24.1375	24.0718	23.9675	24.0312	17	5	24.0586	0.0645789	0.00268423	Q9H3N1	TMX1	1828	Thioredoxin-related transmembrane protein 1 [OS=Homo sapiens]
28.1122	28.0399	28.0278	28.2059	28.197	28.1014	53	33	28.114	0.0753782	0.00268116	P00747	PLG	1829	Plasminogen [OS=Homo sapiens]
26.2452	26.1878	26.3118	26.127	26.1326	26.1938	48	7	26.1997	0.0701419	0.0026772	P62987	UBA52	1830	Ubiquitin-60S ribosomal protein L40 [OS=Homo sapiens]
28.7417	28.7092	28.8627	28.7922	28.8756	28.8969	39	35	28.8131	0.0770967	0.00267576	P14625	HSP90B1	1831	Endoplasmin [OS=Homo sapiens]
28.4787	28.6581	28.4771	28.5497	28.5628	28.454	55	33	28.5301	0.0762412	0.00267231	Q05682	CALD1	1832	Isoform 4 of Caldesmon [OS=Homo sapiens]
26.0752	26.1377	26.1377	26.2483	26.2488	26.1371	57	9	26.1641	0.0696828	0.00266329	Q06830	PRDX1	1833	peroxiredoxin-1 [OS=Homo sapiens]
25.5356	25.4599	25.6578	25.5714	25.4992	25.5563	26	17	25.5467	0.0677621	0.00265248	Q8NEU8	APPL2	1834	DCC-interacting protein 13-beta [OS=Homo sapiens]
23.7392	23.6711	23.7188	23.8386	23.7774	23.8163	41	10	23.7602	0.0627425	0.00264065	Q9UIJ7	AK3	1835	GTP:AMP phosphotransferase AK3, mitochondrial [OS=Homo sapiens]
30.0557	30.0351	29.9223	30.1441	29.9529	30.0308	34	68	30.0235	0.0787251	0.00262212	P02751	FN1	1836	Isoform 8 of Fibronectin [OS=Homo sapiens]
24.8651	24.9751	24.9567	25.0645	24.9837	25.0051	40	18	24.975	0.0654374	0.00262011	Q07960	ARHGAP1	1837	rho GTPase-activating protein 1 [OS=Homo sapiens]
28.7105	28.7719	28.659	28.8343	28.6282	28.7302	44	27	28.7223	0.0749169	0.00260832	P04003	C4BPA	1838	C4b-binding protein alpha chain [OS=Homo sapiens]
26.0888	26.0162	26.0056	26.0636	25.9404	26.1312	51	15	26.041	0.0676844	0.00259915	P50395	GDI2	1839	Rab GDP dissociation inhibitor beta [OS=Homo sapiens]
24.7964	24.8818	24.8833	24.929	24.7993	24.9512	9	3	24.8735	0.064419	0.00258986	P02745	C1QA	1840	Complement C1q subcomponent subunit A [OS=Homo sapiens]
26.8205	26.9748	27.0073	27.0098	26.9517	26.9485	36	16	26.9521	0.0696161	0.00258296	P06576	ATP5F1B	1841	ATP synthase subunit beta, mitochondrial [OS=Homo sapiens]
25.0097	24.9636	25.077	25.0097	25.0829	25.1416	13	13	25.0474	0.0646409	0.00258074	Q9BSJ8	ESYT1	1842	Extended synaptotagmin-1 [OS=Homo sapiens]
31.8521	31.869	31.9141	31.7447	31.7518	31.7114	59	55	31.8072	0.0817748	0.00257095	P02671	FGA	1843	Fibrinogen alpha chain [OS=Homo sapiens]
29.992	29.9242	29.8	29.9118	29.9873	30.0039	70	37	29.9365	0.0769357	0.00256996	P06727	APOA4	1844	Apolipoprotein A-IV [OS=Homo sapiens]
28.448	28.3102	28.4922	28.3826	28.3184	28.4126	45	19	28.394	0.0718238	0.00252954	O95810	CAVIN2	1845	caveolae-associated protein 2 [OS=Homo sapiens]
23.6921	23.7104	23.7509	23.6532	23.6413	23.5808	6	5	23.6714	0.0595075	0.00251389	Q8IWA5	SLC44A2	1846	Choline transporter-like protein 2 [OS=Homo sapiens]
24.5038	24.4093	24.4705	24.4709	24.4948	24.5969	32	2	24.491	0.0614511	0.00250913	A0A0B4J1V6	IGHV3-73	1847	immunoglobulin heavy variable 3-73 [OS=Homo sapiens]
25.689	25.8473	25.8697	25.7822	25.7951	25.7603	24	28	25.7906	0.0645014	0.00250096	Q12913	PTPRJ	1848	Receptor-type tyrosine-protein phosphatase eta [OS=Homo sapiens]
24.5499	24.4671	24.524	24.5727	24.4179	24.4491	35	7	24.4968	0.0611666	0.00249693	P62993	GRB2	1849	Growth factor receptor-bound protein 2 [OS=Homo sapiens]
26.5402	26.6992	26.6121	26.7103	26.6781	26.6944	37	16	26.6557	0.0664973	0.00249467	P61158	ACTR3	1850	actin-related protein 3 [OS=Homo sapiens]
24.2231	24.2464	24.1642	24.2019	24.2719	24.1055	28	9	24.2022	0.0600922	0.00248293	P49407	ARRB1	1851	Beta-arrestin-1 [OS=Homo sapiens]
27.0118	27.1045	27.0676	27.1169	27.211	27.0665	47	13	27.0964	0.0670798	0.0024756	P05534	HLA-A	1852	HLA class I histocompatibility antigen, A-24 alpha chain [OS=Homo sapiens]
23.1558	23.1926	23.0752	23.2098	23.0798	23.1718	28	3	23.1475	0.0572489	0.00247322	P51153	RAB13	1853	Ras-related protein Rab-13 [OS=Homo sapiens]
27.1646	27.2405	27.1395	27.3106	27.173	27.1456	23	21	27.1956	0.0668629	0.00245859	Q14624	ITIH4	1854	Inter-alpha-trypsin inhibitor heavy chain H4 [OS=Homo sapiens]
29.3392	29.3355	29.4576	29.3063	29.2516	29.2805	36	32	29.3284	0.0714712	0.00243692	P08514	ITGA2B	1855	Isoform 2 of Integrin alpha-IIb [OS=Homo sapiens]
24.7449	24.8652	24.8191	24.8893	24.8913	24.781	44	7	24.8318	0.0604335	0.00243371	P01591	JCHAIN	1856	Immunoglobulin J chain [OS=Homo sapiens]
30.3011	30.1694	30.3164	30.2835	30.3708	30.3671	21	23	30.3014	0.0736176	0.00242952	Q13423	NNT	1857	NAD(P) transhydrogenase, mitochondrial [OS=Homo sapiens]
27.0823	27.1576	27.1259	27.0692	27.0473	26.9687	29	68	27.0752	0.065678	0.00242576	P02549	SPTA1	1858	spectrin alpha chain, erythrocytic 1 [OS=Homo sapiens]
22.942	22.8416	22.9735	22.8619	22.9509	22.9594	39	9	22.9215	0.0554341	0.00241843	O43396	TXNL1	1859	Thioredoxin-like protein 1 [OS=Homo sapiens]
26.2532	26.1896	26.1869	26.1389	26.2779	26.1149	24	14	26.1936	0.063103	0.0024091	P05546	SERPIND1	1860	Heparin cofactor 2 [OS=Homo sapiens]
27.6939	27.853	27.7613	27.7143	27.7486	27.6611	41	15	27.7387	0.0668056	0.00240839	P04406	GAPDH	1861	glyceraldehyde-3-phosphate dehydrogenase [OS=Homo sapiens]
24.8243	24.8774	24.7326	24.8685	24.8622	24.8888	20	8	24.8423	0.0580166	0.0023354	Q6IBS0	TWF2	1862	Twinfilin-2 [OS=Homo sapiens]
27.1462	27.2135	27.2159	27.2759	27.0953	27.1673	24	10	27.1857	0.0630699	0.00231997	Q9HBI1	PARVB	1863	Beta-parvin [OS=Homo sapiens]
25.7002	25.6842	25.5774	25.5517	25.5993	25.6392	35	5	25.6253	0.0594281	0.00231912	Q9NR12	PDLIM7	1864	PDZ and LIM domain protein 7 [OS=Homo sapiens]
26.2814	26.3542	26.3135	26.3972	26.3579	26.2299	36	16	26.3224	0.0603163	0.00229145	P30740	SERPINB1	1865	Leukocyte elastase inhibitor [OS=Homo sapiens]
26.0174	25.9872	26.0576	26.0738	25.9669	25.9138	35	18	26.0028	0.0595092	0.00228857	P36871	PGM1	1866	Phosphoglucomutase-1 [OS=Homo sapiens]
23.8496	23.8384	23.9231	23.8227	23.7917	23.9237	31	13	23.8582	0.054127	0.0022687	P13489	RNH1	1867	Ribonuclease inhibitor [OS=Homo sapiens]
27.2497	27.3645	27.3181	27.3742	27.2405	27.2458	36	21	27.2988	0.0616361	0.00225783	P07237	P4HB	1868	Protein disulfide-isomerase [OS=Homo sapiens]
28.1146	28.1868	28.2899	28.2486	28.1553	28.2005	45	13	28.1993	0.0631028	0.00223774	P02749	APOH	1869	Beta-2-glycoprotein 1 [OS=Homo sapiens]
24.9735	24.9572	25.0967	25.0492	25.007	24.9633	19	7	25.0078	0.0553814	0.00221456	O43488	AKR7A2	1870	aflatoxin B1 aldehyde reductase member 2 [OS=Homo sapiens]
27.3291	27.4532	27.3179	27.3363	27.3108	27.2766	45	15	27.3373	0.0604384	0.00221084	Q9NZN3	EHD3	1871	EH domain-containing protein 3 [OS=Homo sapiens]
17.4934	17.3823	17.4585	17.4515	17.4788	17.4647	1	1	17.4549	0.0385878	0.00221072	P15144	ANPEP	1872	aminopeptidase N [OS=Homo sapiens]
27.3576	27.4797	27.4946	27.5197	27.4042	27.4563	4	126	27.452	0.0606171	0.00220811	Q8WZ42	TTN	1873	Isoform 12 of Titin [OS=Homo sapiens]
23.8311	23.7968	23.878	23.7345	23.775	23.8502	20	15	23.811	0.0524822	0.00220412	O43150	ASAP2	1874	Arf-GAP with SH3 domain, ANK repeat and PH domain-containing protein 2 [OS=Homo sapiens]
33.3924	33.408	33.3185	33.472	33.5327	33.4026	71	51	33.421	0.0733918	0.00219598	P02768	ALB	1875	Serum albumin [OS=Homo sapiens]
24.9501	25.0004	24.9884	25.1089	25.0038	24.9775	29	18	25.0049	0.0545183	0.00218031	P38646	HSPA9	1876	Stress-70 protein, mitochondrial [OS=Homo sapiens]
21.9356	21.9146	21.8297	21.8438	21.867	21.8179	18	2	21.8681	0.0475581	0.00217477	P49773	HINT1	1877	Histidine triad nucleotide-binding protein 1 [OS=Homo sapiens]
26.7709	26.712	26.7106	26.8656	26.7504	26.7311	48	5	26.7568	0.0581117	0.00217185	P01859	IGHG2	1878	Immunoglobulin heavy constant gamma 2 [OS=Homo sapiens]
27.7359	27.8846	27.8328	27.7769	27.7541	27.7377	37	22	27.787	0.0597675	0.00215092	O75083	WDR1	1879	WD repeat-containing protein 1 [OS=Homo sapiens]
26.1309	25.9747	26.0539	26.0203	26.013	26.085	36	13	26.0463	0.0559205	0.00214697	P50148	GNAQ	1880	Guanine nucleotide-binding protein G(Q) subunit alpha [OS=Homo sapiens]
31.8837	32.0112	32.0491	32.0814	31.9789	31.9819	49	236	31.9977	0.0684458	0.00213908	P04114	APOB	1881	apolipoprotein B-100 [OS=Homo sapiens]
25.4874	25.5575	25.412	25.513	25.4348	25.4473	34	26	25.4753	0.0543227	0.00213236	Q14644	RASA3	1882	Ras GTPase-activating protein 3 [OS=Homo sapiens]
28.1313	28.1874	28.3015	28.2115	28.1819	28.1487	66	19	28.1937	0.060045	0.00212973	P04075	ALDOA	1883	fructose-bisphosphate aldolase A [OS=Homo sapiens]
31.0702	31.1429	31.1421	31.0758	31.0516	30.9664	69	80	31.0748	0.0655401	0.00210911	P18206	VCL	1884	Isoform 1 of Vinculin [OS=Homo sapiens]
25.8527	25.8403	25.8827	25.7868	25.8065	25.7303	28	14	25.8165	0.0541759	0.0020985	P19971	TYMP	1885	thymidine phosphorylase [OS=Homo sapiens]
31.6158	31.7365	31.654	31.6462	31.6751	31.538	66	31	31.6443	0.0658345	0.00208045	P02679	FGG	1886	Fibrinogen gamma chain [OS=Homo sapiens]
24.9002	25.0103	24.9138	24.9201	24.8726	24.8696	4	31	24.9144	0.0513363	0.00206051	Q9UPN3	MACF1	1887	Microtubule-actin cross-linking factor 1, isoforms 1/2/3/5 [OS=Homo sapiens]
25.0453	24.9413	24.9431	25.0323	25.0309	24.9445	44	5	24.9896	0.0513065	0.00205312	P27348	YWHAQ	1888	14-3-3 protein theta [OS=Homo sapiens]
26.6044	26.6103	26.5831	26.6201	26.5955	26.7323	43	22	26.6243	0.0543992	0.00204322	P25705	ATP5F1A	1889	ATP synthase subunit alpha, mitochondrial [OS=Homo sapiens]
23.311	23.3645	23.4238	23.3928	23.4412	23.3558	26	12	23.3815	0.0477449	0.00204199	Q13884	SNTB1	1890	Beta-1-syntrophin [OS=Homo sapiens]
29.8721	30.0242	29.9572	29.9009	29.9381	29.8606	67	9	29.9255	0.0609516	0.00203677	P67936	TPM4	1891	Tropomyosin alpha-4 chain [OS=Homo sapiens]
28.481	28.4368	28.3955	28.5305	28.469	28.5388	63	12	28.4753	0.0547954	0.00192431	P63104	YWHAZ	1892	14-3-3 protein zeta/delta [OS=Homo sapiens]
29.0782	29.0442	29.0646	29.0205	29.0143	29.1669	48	15	29.0648	0.0557528	0.00191822	Q9H4B7	TUBB1	1893	tubulin beta-1 chain [OS=Homo sapiens]
26.6797	26.6749	26.6526	26.62	26.6226	26.759	47	9	26.6681	0.0511234	0.00191702	Q04917	YWHAH	1894	14-3-3 protein eta [OS=Homo sapiens]
29.4246	29.4003	29.4812	29.3869	29.3131	29.4313	49	41	29.4062	0.0559865	0.0019039	P08519	LPA	1895	apolipoprotein(a) [OS=Homo sapiens]
30.0467	30.0742	30.0574	29.9905	29.96	29.9359	53	38	30.0108	0.0567375	0.00189057	P05106	ITGB3	1896	Integrin beta-3 [OS=Homo sapiens]
24.1599	24.1407	24.2149	24.2088	24.0931	24.1482	5	7	24.1609	0.0455634	0.00188583	P30622	CLIP1	1897	Isoform 3 of CAP-Gly domain-containing linker protein 1 [OS=Homo sapiens]
24.8544	24.9679	24.8632	24.9373	24.8689	24.8817	36	4	24.8956	0.046088	0.00185125	P58546	MTPN	1898	Myotrophin [OS=Homo sapiens]
28.7203	28.7235	28.813	28.6584	28.7013	28.6932	51	22	28.7183	0.0519863	0.00181021	Q15942	ZYX	1899	Zyxin [OS=Homo sapiens]
29.8275	29.8576	29.862	29.9736	29.9041	29.9243	35	39	29.8915	0.0530771	0.00177566	P01023	A2M	1900	alpha-2-macroglobulin [OS=Homo sapiens]
27.5571	27.4855	27.5461	27.4213	27.4971	27.4905	51	13	27.4996	0.04875	0.00177275	P60174	TPI1	1901	Isoform 2 of Triosephosphate isomerase [OS=Homo sapiens]
24.5794	24.6057	24.6177	24.6635	24.5828	24.6853	49	5	24.6224	0.0432403	0.00175614	P18859	ATP5PF	1902	ATP synthase-coupling factor 6, mitochondrial [OS=Homo sapiens]
28.1513	28.2782	28.1891	28.2211	28.2515	28.2591	33	27	28.2251	0.0478163	0.00169411	Q93084	ATP2A3	1903	Sarcoplasmic/endoplasmic reticulum calcium atpase 3 [OS=Homo sapiens]
23.2971	23.2994	23.2676	23.2179	23.3341	23.2857	26	11	23.2836	0.0388696	0.00166939	Q8NBS9	TXNDC5	1904	Thioredoxin domain-containing protein 5 [OS=Homo sapiens]
28.2394	28.3027	28.3142	28.3599	28.3129	28.3724	44	12	28.3169	0.0472386	0.00166821	P27105	STOM	1905	erythrocyte band 7 integral membrane protein [OS=Homo sapiens]
27.427	27.3536	27.4529	27.4404	27.3474	27.39	40	31	27.4019	0.0450783	0.00164508	O15117	FYB1	1906	Isoform 3 of FYN-binding protein 1 [OS=Homo sapiens]
25.3965	25.3949	25.4225	25.4249	25.3352	25.4581	14	8	25.4053	0.0413781	0.00162872	P30153	PPP2R1A	1907	serine/threonine-protein phosphatase 2A 65 kDa regulatory subunit A alpha isoform [OS=Homo sapiens]
27.1342	27.083	27.1522	27.0609	27.068	27.1577	31	14	27.1093	0.0436887	0.00161157	Q9UNF0	PACSIN2	1908	Protein kinase C and casein kinase substrate in neurons protein 2 [OS=Homo sapiens]
25.1958	25.2338	25.1609	25.2261	25.2453	25.1491	37	16	25.2018	0.0399542	0.00158537	P28838	LAP3	1909	cytosol aminopeptidase [OS=Homo sapiens]
24.2519	24.2569	24.3228	24.2887	24.2644	24.2143	36	16	24.2665	0.0366207	0.0015091	Q16555	DPYSL2	1910	Dihydropyrimidinase-related protein 2 [OS=Homo sapiens]
24.1571	24.0845	24.0748	24.1231	24.1036	24.0575	23	7	24.1001	0.0360191	0.00149456	P13716	ALAD	1911	Delta-aminolevulinic acid dehydratase [OS=Homo sapiens]
31.1871	31.0592	31.0846	31.0778	31.0755	31.1083	41	6	31.0988	0.046141	0.00148369	P02654	APOC1	1912	Apolipoprotein C-I [OS=Homo sapiens]
27.9092	27.946	27.9389	27.9378	28.0281	27.9735	42	24	27.9556	0.0410299	0.00146768	P30101	PDIA3	1913	Protein disulfide-isomerase A3 [OS=Homo sapiens]
29.138	29.1437	29.1668	29.1692	29.2062	29.0785	34	23	29.1504	0.0426848	0.0014643	P27824	CANX	1914	Calnexin [OS=Homo sapiens]
26.5803	26.6595	26.6009	26.6328	26.5509	26.5889	50	12	26.6022	0.0387658	0.00145724	P30041	PRDX6	1915	Peroxiredoxin-6 [OS=Homo sapiens]
23.2415	23.2373	23.2403	23.3035	23.2048	23.228	28	10	23.2426	0.0328084	0.00141157	P49593	PPM1F	1916	Protein phosphatase 1F [OS=Homo sapiens]
28.291	28.3884	28.387	28.3311	28.3278	28.373	36	42	28.3497	0.0392586	0.0013848	Q13201	MMRN1	1917	Multimerin-1 [OS=Homo sapiens]
27.0353	27.0034	27.0496	27.0823	26.9779	27.0117	66	8	27.0267	0.036965	0.00136772	Q9NRW1	RAB6B	1918	Ras-related protein Rab-6B [OS=Homo sapiens]
26.5677	26.6133	26.5644	26.6136	26.5217	26.6012	34	42	26.5803	0.0359747	0.00135343	O75116	ROCK2	1919	Rho-associated protein kinase 2 [OS=Homo sapiens]
24.3768	24.4172	24.3849	24.3355	24.4013	24.3416	6	5	24.3762	0.032383	0.00132847	Q5T9A4	ATAD3B	1920	ATPase family AAA domain-containing protein 3B [OS=Homo sapiens]
32.1465	32.2693	32.1947	32.215	32.1682	32.1837	63	117	32.1962	0.0426594	0.00132498	P35579	MYH9	1921	Myosin-9 [OS=Homo sapiens]
32.6189	32.6522	32.703	32.6467	32.6484	32.5731	62	148	32.6404	0.042808	0.0013115	P21333	FLNA	1922	Isoform 2 of Filamin-A [OS=Homo sapiens]
26.8218	26.8387	26.8204	26.8684	26.883	26.8037	23	37	26.8393	0.0306227	0.00114096	Q00610	CLTC	1923	Isoform 2 of Clathrin heavy chain 1 [OS=Homo sapiens]
25.1294	25.107	25.0857	25.1609	25.0937	25.124	46	10	25.1168	0.0274029	0.00109102	Q99497	PARK7	1924	protein/nucleic acid deglycase DJ-1 [OS=Homo sapiens]
27.6409	27.6853	27.6919	27.6815	27.6158	27.6504	24	23	27.661	0.0300796	0.00108744	P19827	ITIH1	1925	Inter-alpha-trypsin inhibitor heavy chain H1 [OS=Homo sapiens]
29.5447	29.5752	29.604	29.587	29.5138	29.5594	53	28	29.564	0.0321426	0.00108722	P04004	VTN	1926	Vitronectin [OS=Homo sapiens]
26.8756	26.8813	26.8946	26.9314	26.9437	26.8936	32	24	26.9034	0.0277052	0.0010298	P07225	PROS1	1927	Vitamin K-dependent protein S [OS=Homo sapiens]
31.1519	31.1915	31.1364	31.1609	31.1589	31.1148	62	35	31.1524	0.0257535	0.000826693	P12814	ACTN1	1928	Alpha-actinin-1 [OS=Homo sapiens]
