# Supplementary material for: A large-scale proteomics resource of circulating extracellular vesicles for biomarker discovery in pancreatic cancer
Source: eLife. 2024 Dec 18;12:RP87369. doi: 10.7554/eLife.87369 (PMC11655061; doi:10.7554/eLife.87369)
Supplement: Supplementary file 3. [file elife-87369-supp3.xlsx]

## Sheet: Proteins
Supplementary Table 3. LC-MS results of EV analysis of plasma from patients with PDAC (PA), IPMN, Chronic Pancreatitis (CP) and Control individuals
Accession	Gene Symbol	Description	Protein FDR Confidence: A5 PMI-Byonic	Protein FDR Confidence: Sequest HT	Exp. q-value: A5 PMI-Byonic	Exp. q-value: Sequest HT	Coverage [%]	# PSMs	# Unique Peptides	# AAs	MW [kDa]	calc. pI	Score Sequest HT: Sequest HT	Biological Process	Cellular Component	Molecular Function	Pfam IDs	Entrez Gene ID	Chromosome	Ensembl Gene ID	KEGG Pathways	Reactome Pathways	WikiPathways	# Protein Pathway Groups	# Razor Peptides	Abundances (Normalized): F1: Control, Control, Patient01	Abundances (Normalized): F2: Control, Control, Patient02	Abundances (Normalized): F3: Control, Control, Patient03	Abundances (Normalized): F4: Control, Control, Patient04	Abundances (Normalized): F5: Control, Control, Patient05	Abundances (Normalized): F6: Control, Control, Patient06	Abundances (Normalized): F7: Control, Control, Patient07	Abundances (Normalized): F8: Control, Control, Patient08	Abundances (Normalized): F9: Control, Control, Patient09	Abundances (Normalized): F10: Control, Control, Patient10	Abundances (Normalized): F11: Control, Control, Patient11	Abundances (Normalized): F12: Sample, CP, Patient12	Abundances (Normalized): F13: Sample, CP, Patient13	Abundances (Normalized): F14: Sample, CP, Patient14	Abundances (Normalized): F15: Sample, CP, Patient15	Abundances (Normalized): F16: Sample, CP, Patient16	Abundances (Normalized): F17: Sample, CP, Patient17	Abundances (Normalized): F18: Sample, CP, Patient18	Abundances (Normalized): F19: Sample, CP, Patient19	Abundances (Normalized): F20: Sample, CP, Patient20	Abundances (Normalized): F21: Sample, CP, Patient21	Abundances (Normalized): F22: Sample, CP, Patient22	Abundances (Normalized): F23: Sample, CP, Patient23	Abundances (Normalized): F24: Sample, IPMN, Patient24
P04114	APOB	apolipoprotein B-100 [OS=Homo sapiens]	n/a	High		0	67	75190	365	4563	515.3	7.05	45045.6	cell organization and biogenesis;cellular component movement;metabolic process;regulation of biological process;response to stimulus;transport	cytoplasm;cytosol;endoplasmic reticulum;endosome;extracellular;membrane;organelle lumen	protein binding;transporter activity	Pf01347, Pf04286, Pf06448, Pf09172, Pf12491	338	2		Fat digestion and absorption; Vitamin digestion and absorption	Post-translational protein phosphorylation; Cargo recognition for clathrin-mediated endocytosis; Regulation of Insulin-like Growth Factor (IGF) transport and uptake by Insulin-like Growth Factor Binding Proteins (IGFBPs); LDL remodeling; Scavenging by Class H Receptors; VLDL clearance; Retinoid metabolism and transport; Chylomicron remodeling; Scavenging by Class A Receptors; LDL clearance; Plate…	Selenium Micronutrient Network; Vitamin B12 Metabolism; Folate Metabolism; Statin Pathway	46	0	2.0149e+10	2.11238e+10	4.64104e+10	1.72525e+10	3.18451e+10	1.79907e+10	1.32834e+10	1.03812e+10	6.93112e+09	8.65152e+09	7.48503e+09	1.06897e+10	3.26177e+10	9.8828e+10	6.27087e+10	1.54469e+10	1.56672e+10	1.04195e+10	2.01848e+10	1.01879e+10	1.54891e+10	1.83218e+10	1.01873e+10	1.42454e+10
	Confidence	Annotated Sequence	Modifications	# Protein Groups	# PSMs	Master Protein Accessions	Positions in Master Proteins	Modifications in Master Proteins	# Missed Cleavages	Theo. MH+ [Da]	# Razor Quan Results	Abundance Ratio Adj. P-Value: (CP, Sample) / (Control, Control)	Abundance Ratio Adj. P-Value: (IPMN, Sample) / (Control, Control)	Abundance Ratio Adj. P-Value: (PA, Sample) / (Control, Control)	Abundances (Normalized): F1: Control, Control, Patient01	Abundances (Normalized): F2: Control, Control, Patient02	Abundances (Normalized): F3: Control, Control, Patient03	Abundances (Normalized): F4: Control, Control, Patient04	Abundances (Normalized): F5: Control, Control, Patient05	Abundances (Normalized): F6: Control, Control, Patient06	Abundances (Normalized): F7: Control, Control, Patient07	Abundances (Normalized): F8: Control, Control, Patient08	Abundances (Normalized): F9: Control, Control, Patient09	Abundances (Normalized): F10: Control, Control, Patient10	Abundances (Normalized): F11: Control, Control, Patient11	Abundances (Normalized): F12: Sample, CP, Patient12	Abundances (Normalized): F13: Sample, CP, Patient13	Abundances (Normalized): F14: Sample, CP, Patient14	Abundances (Normalized): F15: Sample, CP, Patient15	Abundances (Normalized): F16: Sample, CP, Patient16	Abundances (Normalized): F17: Sample, CP, Patient17	Abundances (Normalized): F18: Sample, CP, Patient18	Abundances (Normalized): F19: Sample, CP, Patient19	Abundances (Normalized): F20: Sample, CP, Patient20	Abundances (Normalized): F21: Sample, CP, Patient21	Abundances (Normalized): F22: Sample, CP, Patient22	Abundances (Normalized): F23: Sample, CP, Patient23	Abundances (Normalized): F24: Sample, IPMN, Patient24	Abundances (Normalized): F25: Sample, IPMN, Patient25	Abundances (Normalized): F26: Sample, IPMN, Patient26	Abundances (Normalized): F27: Sample, IPMN, Patient27	Abundances (Normalized): F28: Sample, IPMN, Patient28	Abundances (Normalized): F29: Sample, IPMN, Patient29	Abundances (Normalized): F30: Sample, IPMN, Patient30	Abundances (Normalized): F31: Sample, IPMN, Patient31	Abundances (Normalized): F32: Sample, PA, Patient32	Abundances (Normalized): F33: Sample, PA, Patient33	Abundances (Normalized): F34: Sample, PA, Patient34	Abundances (Normalized): F35: Sample, PA, Patient35
	High	[R].VPSYTLILPSLELPVLHVPR.[N]		1	27	P04114	P04114 [3292-3311]		0	2243.32	0	0.785056	0.521879	0.970072					6333.57	9447.57	3271.31	221992	118388	85508.7	114732	76201.8	195395	811960	1.92552e+06		843401	106248	174370	83716.8			457065	151713	150928	623157	377762	1.6233e+06	272733	219098	260201	275544	348984	1.99531e+06	1.34573e+06
	High	[R].IHSGSFQSQVELSNDQEK.[A]		1	595	P04114	P04114 [3639-3656]		0	2032.96	38	0.959895	0.263412	0.782491	1.69455e+07	3.44125e+07	5.35292e+07	2.21065e+07	6.69256e+07	1.88835e+07	3.07218e+07	2.59325e+07	5.77055e+06	1.53049e+07	4.57901e+06	1.14943e+07	1.03844e+08	2.16971e+08	2.24378e+08	1.03789e+07	2.11028e+07	6.10988e+06	2.70363e+07	6.17402e+06	1.73699e+07	2.20984e+07	1.18455e+07	4.06252e+07	2.8674e+07	1.5194e+08	5.03935e+07	3.1152e+07	4.40841e+07	7.98647e+07	5.219e+07	3.56661e+07	1.99433e+07	9.09171e+06	2.88634e+08
	High	[K].ADSVVDLLSYNVQGSGETTYDHK.[N]		1	838	P04114	P04114 [1393-1415]		0	2498.17	4	0.0167802	0.807733	0.904091	1.64867e+06	3.63293e+06	1.75182e+07	6.38547e+06	1.14585e+07	3.20216e+06	963421	958023	880366	1.51796e+06	381802	3.08491e+06	8.80108e+06	3.89216e+07	2.28729e+07	8.9626e+06	1.84163e+07	3.61046e+06	1.43221e+07	364297	3.40319e+06	7.3693e+06	4.1201e+06	2.60521e+06	1.83616e+06	1.1453e+07	1.00444e+06	2.5901e+06	2.49759e+06	2.9003e+06	3.34764e+06	1.84041e+06	2.56768e+06	6.13097e+07	2.79314e+07
	High	[K].FDHTNSLNIAGLSLDFSSK.[L]		1	42	P04114	P04114 [1751-1769]		0	2066.02	1	0.666592	0.913172	0.783557	974787	827097	731840	564863	600454	21947.5	369230	474890	274348	529380	5853.46	133075	192845	2.40424e+06	646319	62312.7	139810	399051	204652	19201.4	199277	286445	268395	405476	2467.88	375462	2.84179e+06	823997	366593	431445	202247	4695.48	602132	7.48811e+06	3.80497e+06
	High	[K].LEIQSQVDSQHVGHSVLTAK.[G]		1	179	P04114	P04114 [2986-3005]		0	2176.14	10	0.559726	0.337255	0.372568	3.32317e+06	9.6732e+06	1.25254e+07	7.54996e+06	8.05429e+07	1.1133e+06	2.1891e+07	1.26414e+07	501507	1.05757e+06	215831	1.631e+06	1.89716e+08	5.73511e+08	1.80699e+08	1.30017e+06	3.34128e+06	2.63984e+06	6.07151e+06	523768	4.40393e+06	3.12433e+06	1.79254e+06	3.25326e+06	1.07773e+07	7.45888e+06	7.72973e+06	2.27581e+06	3.07127e+06	2.16665e+06	2.50465e+06	3.5674e+07	6.88442e+06	6.77894e+08	2.7382e+08
	High	[K].LLSGGNTLHLVSTTK.[T]		1	542	P04114	P04114 [935-949]		0	1540.87	22	0.995656	0.600526	0.954735	3.23806e+07	4.71846e+07	9.26391e+07	4.7342e+07	6.98589e+07	2.75517e+07	1.05499e+07	1.91617e+07	1.13838e+07	1.88899e+07	1.26481e+07	5.01904e+06	5.78556e+07	1.69727e+08	1.03645e+08	9.18429e+06	2.44817e+07	1.42603e+07	1.9498e+07	1.0623e+07	1.89156e+07	6.85122e+07	5.63709e+07	4.56193e+07	3.44261e+07	1.06933e+08	5.67689e+07	2.33679e+07	4.25992e+07	3.13568e+07	4.80656e+07	2.13621e+07	5.0966e+07	1.67365e+08	1.06821e+08
	High	[R].TEHGSEMLFFGNAIEGK.[S]	1xOxidation [M7]	1	232	P04114	P04114 [2837-2853]		0	1882.86	1	0.83063	0.861266	0.989994	1.52175e+06	2.41e+06	2.06085e+06	91835.8	8.43512e+06	1.58452e+06	1.46271e+06	2.87639e+06	240939	125369	139917	1.65952e+06	2.91332e+07	9.26175e+07	1.55092e+07	1.77986e+06	2.1679e+06	1.15381e+06	2.76567e+06	241785	4.50404e+06	1.60006e+06	3.40907e+06	1.11969e+06	1.10335e+06	2.34029e+06	3.26648e+06	644461	136207	688143	1.4428e+06	3.13333e+06	1.52719e+06		3.00339e+07
	High	[R].FSDEGTHESQISFTIEGPLTSFGLSNK.[I]		1	21	P04114	P04114 [2936-2962]		0	2928.39	0	0.942852	0.694917	0.814635	9879.92			19494.5		62509.7		77753.5			23597.4				47496.8											3966.17	24593.1	53224		2484.79
	High	[K].SFDYHQFVDETNDK.[I]		1	305	P04114	P04114 [2429-2442]		0	1744.74	5	0.327342	0.495403	0.93909	8.64585e+06	1.21039e+07	3.75749e+07	1.2107e+07	4.84421e+07	4.53294e+06	4.69982e+06	6.05062e+06	2.95393e+06	4.81306e+06	2.33935e+06	1.88454e+06	7.82516e+07	3.01413e+08	1.60277e+08	1.46176e+06	4.12002e+06	1.74883e+06	2.1572e+06	1.25617e+06	1.83105e+06	714879	5.69342e+06	1.17307e+07	1.45641e+07	4.19281e+07	7.49436e+06	9.46737e+06	8.60518e+06	1.06709e+07	1.67719e+07	3.77205e+07	1.61405e+07	3.01352e+08	1.33978e+08
	High	[K].YTYNYEAESSSGVPGTADSR.[S]		1	483	P04114	P04114 [52-71]		0	2153.93	4	0.870558	0.455871	0.88654	1.47833e+07	2.31913e+07	4.65614e+07	1.74189e+07	1.07852e+07	1.68332e+07	3.77711e+06	4.87949e+06	3.26966e+06	4.01334e+06	1.73392e+06	6.50085e+06	1.82919e+07	5.14269e+07	3.36599e+07	9.86845e+06	8.32592e+06	5.4263e+06	1.78429e+07	1.10216e+07	1.10503e+07	1.03269e+07	1.61443e+07	2.84977e+06	6.36251e+06	1.60517e+07	5.33561e+06	5.52365e+06	2.72421e+06	3.66644e+06	4.87122e+06	1.04637e+07	9.32768e+06	6.72843e+07	3.17294e+07
	High	[K].ASGSLPYTQTLQDHLNSLK.[E]		1	698	P04114	P04114 [1241-1259]		0	2073.06	45	0.262676	0.503893	0.828042	1.10813e+07	1.79372e+07	9.05605e+07	1.74479e+07	6.48406e+07	1.40527e+07	7.57308e+06	9.18175e+06	8.30044e+06	1.05446e+07	1.80178e+06	5.464e+06	8.75924e+07	4.0773e+08	2.50566e+08	1.04097e+07	9.88636e+06	7.43815e+06	3.2918e+07	1.37483e+07	9.02616e+06	4.49826e+07	2.66993e+07	1.80855e+07	1.74158e+07	8.50548e+07	1.81341e+07	1.06877e+07	2.02239e+07	4.1939e+07	3.08967e+07	4.66031e+07	5.18527e+07	4.01211e+08	3.17573e+08
	High	[K].HEQDMVNGIMLSVEK.[L]	1xOxidation [M]	1	41	P04114	P04114 [746-760]		0	1745.82	4	0.958681	0.784319	0.956476	43396.9	134578	135006	126911	941701	125950	71105.5				6079.18	18987.2	5.01029e+06	1.49802e+07	5.715e+06	122758	60033.3	16936.8	125170		93272.4	50650	93004.3	221059	78050	274313	706795		167499	356092				3.25943e+07	3.98964e+06
	High	[K].AQNLYQELLTQEGQASFQGLK.[D]		1	299	P04114	P04114 [4148-4168]		0	2366.2	4	0.772065	0.999895	0.634373	3.9193e+06	6.54367e+06	2.20524e+07	7.10299e+06	1.24703e+07	1.95486e+06	901529	1.27706e+06	306577	417892	1.17413e+06	3.23654e+06	2.0022e+07	1.09002e+08	3.9108e+07	1.02204e+07	3.20657e+06	2.54804e+06	7.41938e+06	105085	732874	181228	2469.33	1.31241e+06	1.9424e+06	6.08824e+06	1.93833e+06	945880	1.0958e+06	2.12828e+06	3.38037e+06	4.88777e+06	3.29212e+06	5.13644e+07	5.39401e+07
	High	[R].ILGEELGFASLHDLQLLGK.[L]		1	24	P04114	P04114 [779-797]		0	2053.13	1	0.689567	0.900416	0.984202			2.36922e+06		311447										1.92824e+06												698451		538138			367911
	High	[K].LDFSSQADLRNEIK.[T]		1	428	P04114	P04114 [2898-2911]		1	1635.83	20	0.0755848	0.0301914	0.106794	4.51115e+06	1.69635e+06	7.98085e+06	5.26019e+06	1.89381e+06	3.35698e+06	1.49526e+06	2.43745e+06	933021	706997	779079	2.10931e+06	1.35593e+08	5.35432e+08	7.23516e+07	6.17185e+06	1.38157e+07	3.41617e+06	1.02373e+07	4.4762e+06	6.78992e+06	6.76639e+06	1.76589e+06	1.2101e+07	1.03451e+07	2.38234e+07	1.6097e+06	1.11228e+07	2.07694e+06	4.08968e+06	6.01545e+06	2.84106e+07	1.13344e+07	8.67244e+07	1.27232e+08
	High	[R].DFSAEYEEDGKYEGLQEWEGK.[A]		1	70	P04114	P04114 [3953-3973]		1	2509.07	1	0.421203	0.601196	0.294191	1.21881e+06	837945	1.81161e+06	1.03085e+06	2.08778e+07	3.03593e+06	3.00442e+07	3.68423e+07	2.13571e+07	4.57787e+07	1.2006e+07	4.29502e+06	3.35627e+06	1.34836e+08	5.12706e+07	7.33963e+06	4.0304e+07	1.55701e+07	5.02469e+06	4.04097e+06	3.63107e+07	2.0579e+07	3.19827e+07	2.23155e+07	2.08713e+07	5.13929e+07	64377.7	1.0415e+07	1.74359e+07	2.6814e+07	9.77369e+06	2.38259e+07	1.02449e+06	1.33332e+07	1.2285e+07
	High	[R].TSSFALNLPTLPEVK.[F]		1	433	P04114	P04114 [3776-3790]		0	1616.89	9	0.835025	0.858776	0.89407	1.79933e+07	2.71528e+07	8.51659e+07	2.29971e+07	4.0389e+07	7.26388e+06	1.31888e+06	2.53331e+06	1.40464e+06	2.61774e+06	2.33245e+06	2.00123e+06	2.88467e+07	1.71206e+08	4.81691e+07	6.56372e+06	4.42023e+06	1.25699e+07	3.72426e+07	4.91151e+06	1.18338e+07	5.8818e+06	4.11915e+06	5.00791e+06	5.48368e+06	2.25337e+07	5.07887e+06	4.26137e+06	3.40808e+06	8.69712e+06	1.17658e+07	7.86066e+06	8.51135e+06	7.67046e+07	1.31379e+08
	High	[K].NSLFFSAQPFEITASTNNEGNLK.[V]		1	119	P04114	P04114 [3035-3057]		0	2529.23	0	0.396055	0.163304	0.978102	2.05643e+06	1.32948e+06	2.59492e+06	968936	3.63924e+06	54585.8	205509	294789	150303	423183	608881	342750	2.7362e+06	7.24569e+06	7.5007e+06	411724			1.6337e+06					1.66242e+06	2.234e+06	5.69792e+06	253652	2.12709e+06	2.09443e+06	2.50014e+06	2.62182e+06	1.93951e+06	2.77547e+06	6.11787e+06	8.43227e+06
	High	[K].LALWGEHTGQLYSK.[F]		1	124	P04114	P04114 [1917-1930]		0	1602.83	5	0.999728	0.795793	0.25296	865173	172460	829970	947349	1.8305e+06	648263	576802	3.38623e+06	465744	528473	141178	334359	3.96111e+07	1.99876e+08	5.84773e+07	256150	1.70969e+06	135064	663022	12775.3	706488	178889		1.37336e+06	973885	1.33409e+06	765881	678035	1.03059e+06	1.08319e+06	855775	1.0018e+06	840488	4.36684e+08	5.75957e+07
	High	[R].YEDGTLSLTSTSDLQSGIIK.[N]		1	177	P04114	P04114 [1537-1556]		0	2128.07	2	0.797974	0.78687	0.656844	744242	653619	4.86858e+06	1.06282e+06	4.13637e+06	665775	419387	197781	83355.5	145715	111799	910378	2.16479e+06	4.6445e+06	6.50822e+06	1.06913e+06	1.13254e+06	340048	1.47719e+06	688237	1.41442e+06	960487	908284	310385	449746	824690	229850	620664	294963	861615	212772	905711	375703	1.35614e+07	9.99778e+06
	High	[K].SVSDGIAALDLNAVANK.[I]		1	1167	P04114	P04114 [3830-3846]		0	1657.88	30	0.000116207	0.747325	0.0364935	8.81182e+06	9.48352e+06	5.41926e+07	1.13314e+07	4.07474e+07	4.10267e+06	1.06804e+07	6.41737e+06	6.45016e+06	8.44877e+06	3.39696e+06	2.73455e+07	2.27055e+07	4.86356e+07	4.08869e+07	2.20654e+07	5.465e+07	7.57172e+07	4.31097e+07	4.2876e+07	5.52733e+07	7.27297e+07	7.6808e+07	3.43844e+06	5.3363e+06	1.11694e+07	8.94863e+06	4.81156e+06	3.08398e+06	5.65245e+06	5.30881e+06	2.57362e+07	2.88311e+07	2.63327e+08	1.99308e+08
	High	[K].DQEVLLQTFLDDASPGDK.[R]		1	142	P04114	P04114 [540-557]		0	1990.96	3	0.511659	0.821864	0.777179	4.9775e+06	6.36094e+06	9.64622e+06	2.27708e+06	1.24867e+06	1.02624e+06	3.41512e+06	609168	330452	1.88219e+06	1.1032e+06	1.91561e+06	4.1246e+06	1.4696e+07	6.86518e+06	3.06767e+06	2.43557e+06	5.17469e+06	1.70178e+07	4.58807e+06	2.1957e+06	2.18734e+06	5.56112e+06	3.01285e+06	2.63595e+06	6.43305e+06	228671	3.93476e+06	2.70354e+06	2.41038e+06	3.75138e+06	3.91376e+06	1.94108e+06	1.5081e+07	7.04444e+06
	High	[K].LSLESLTSYFSIESSTK.[G]		1	19	P04114	P04114 [3481-3497]		0	1891.95	0	0.193809	0.989539	0.667815			588172										214068	50419.3												594474						236271
	High	[R].VIGNMGQTMEQLTPELK.[S]	1xOxidation [M]	1	109	P04114	P04114 [491-507]		0	1904.95	4	2.05228e-05	5.50513e-07	0.000102377	3.9257e+06	1.00976e+07	3.3811e+07	9.8234e+06	1.87287e+07	7.34286e+06	7105.3		25670.9	56546.2	51546.8	56592.9	1.12009e+07	3.97553e+07	1.14038e+07	95932.3	97847.9	176063	107422	98182.6	927981			48981.3	148351	416792	1.70336e+06	217082	67892.2	23659.5	353838			3.43995e+07	9.69925e+06
	High	[K].TILGTMPAFEVSLQALQK.[A]	1xOxidation [M6]	1	368	P04114	P04114 [2592-2609]		0	1963.06	3	0.578525	0.273337	0.978238	4.78039e+06	1.02994e+07	1.52478e+07	8.77012e+06	3.31348e+06	3.58159e+06	529954	413112	363182	919561	627990	7.67716e+06	5.59742e+06	3.51145e+07	5.14576e+06	1.49972e+07	1.9863e+07	4.66593e+06	1.17214e+07	3.6028e+06	4.70641e+06		4.80694e+06	734369	1.00784e+06	4.27899e+06	994623	773605	916846	970728	2.0784e+06	2.25303e+06	1.98112e+06	1.64029e+07	1.98991e+07
	High	[K].IADFELPTIIVPEQTIEIPSIK.[F]		1	173	P04114	P04114 [3847-3868]		0	2466.37	3	0.380222	0.979254	0.422568		2.53284e+06	5.6662e+06	1.54539e+06	803055	381143	2.43346e+06			627475	416024	1.06409e+06	3.0601e+06	1.11731e+07	4.04617e+06	1.34977e+06			4.0935e+06					873753	997029	2.65758e+06		1.22283e+06	538829	772016	1.24753e+06	1.36407e+06	647159	5.81198e+06	3.70445e+06
	High	[K].QTVNLQLQPYSLVTTLNSDLK.[Y]		1	26	P04114	P04114 [1782-1802]		0	2375.28	0	0.830831	0.965674	0.468253		1.60309e+06	2.27652e+06	200606			718022	61959.8	142391	325517	132396	430436	726440	4.43526e+06	1.60434e+06	549937	443579	150653	117839		9559.33	54254.3		82909.5	302075	974049		151289		88720.9	391524	445582		2.26382e+06	77892.5
	High	[K].LPQQANDYLNSFNWER.[Q]		1	333	P04114	P04114 [2118-2133]		0	1994.94	2	0.855888	0.95832	0.954835	1.03469e+06	1.50624e+06	3.4757e+06	1.5134e+06	3.12876e+06	850240	527413	277000	201986	408341	219126	903565	1.25528e+07	2.77127e+07	1.52091e+07	1.32461e+06	3.26452e+06	547323	744619	785239	2.12332e+06	1.52854e+06	927715	374354	593896	3.61158e+06	212417	1.04749e+06	1.47188e+06	1.15646e+06	796673	1.49154e+06	902999	5.51167e+07	1.99903e+07
	High	[K].NLTDFAEQYSIQDWAK.[R]		1	106	P04114	P04114 [2560-2575]		0	1928.9	0	0.0705834	0.918466	0.860448	892570	963984	2.49939e+06	300617	1.35122e+06		91103.7	126460	26524.3	33689.5	11372.2		779533	9.71865e+06	2.49117e+06	159944								120668	362074	1.60068e+06	8850.77	131030	12998.6	9052.15	187559	510501	112967	1.24697e+07	2.43749e+06
	High	[K].VSALLTPAEQTGTWK.[L]		1	417	P04114	P04114 [1968-1982]		0	1601.85	15	0.761234	0.524352	0.871523	8.17787e+06	2.32308e+07	8.55104e+07	2.67967e+07	5.76818e+07	1.07037e+07	8.40853e+06	7.45899e+06	1.41295e+06	3.29332e+06	5.00342e+06	3.08423e+06	8.6302e+07	2.71746e+08	2.19671e+08	1.07295e+07	5.97492e+06	3.02421e+06	1.0472e+07	8.85109e+06	1.29076e+07	1.45851e+07	1.17938e+07	1.36493e+07	1.62901e+07	5.44424e+07	189463	1.70121e+07	5.6887e+06	1.46675e+07	1.47e+07	4.0547e+07	1.76403e+07	4.48964e+08	3.19767e+08
	High	[R].IGQDGISTSATTNLK.[C]		1	573	P04114	P04114 [1647-1661]		0	1505.78	13	0.966072	0.983174	0.979379	6.73737e+07	1.27248e+08	3.02471e+08	7.47144e+07	1.50744e+08	7.8955e+07	4.06216e+07	3.6642e+07	1.04076e+07	2.85044e+07	1.81245e+07	4.71226e+07	2.13766e+08	4.43676e+08	3.32502e+08	6.95791e+07	8.56039e+07	1.19772e+07	7.01177e+07	1.8988e+07	5.07971e+07	5.18664e+07	5.0356e+07	6.57607e+07	6.94877e+07	1.86422e+08	4.90109e+07	5.20295e+07	3.53691e+07	7.93124e+07	7.37526e+07	1.58399e+08	9.52826e+07	5.6113e+08	4.13893e+08
	High	[R].SEILAHWSPAK.[L]		1	220	P04114	P04114 [1135-1145]		0	1238.65	5	0.703465	0.699773	0.00860144	3.21614e+08	3.11187e+08	3.19364e+08	2.95816e+08	3.67796e+08	2.48381e+08	1.77348e+08	1.60667e+08	1.45512e+08	1.64083e+08	9.8619e+07	7.7106e+07	2.08202e+08	7.61345e+08	3.40136e+08	7.18755e+07	1.05907e+08	1.29343e+08	1.76579e+08	8.70394e+07	1.38775e+08	2.13358e+08	1.34927e+08	1.77649e+08	1.04507e+08	2.46736e+08	2.39074e+07	1.7686e+08	1.39411e+08	1.76363e+08	1.41581e+08	1.46986e+08	1.40689e+08	3.12752e+08	5.22011e+08
	High	[K].EQHLFLPFSYK.[N]		1	45	P04114	P04114 [263-273]		0	1408.73	2	0.961027	0.473184	0.777448	107841	171178	209420	7727.73		519564	40875.8	61955.1	30903.8	180496	117474	65824.4	7.0084e+06	4.87168e+06	4.72287e+06	124211	166478	37761.1	21244.7			26489.9	14301.4	261817	450258	1.14386e+06	633105	802769	265208	125482	40216.5	298110	2.75342e+06	3.22669e+06	9.83457e+06
	High	[R].LPYTIITTPPLK.[D]		1	908	P04114	P04114 [3137-3148]		0	1356.81	23	0.0114609	0.999231	0.0513048	1.36135e+07	3.30219e+07	1.31921e+08	3.74176e+07	8.89383e+07	7.48178e+06	9.02879e+06	1.90024e+07	7.07269e+06	5.34169e+06	4.44977e+06	2.08954e+07	6.51949e+07	5.55748e+08	1.0969e+08	2.48345e+07	4.16182e+07	1.37805e+07	2.55156e+07	4.56121e+07	1.59144e+07	6.78044e+07	4.20047e+07	1.2591e+07	8.19852e+06	5.38147e+07	1.19525e+07	1.10522e+07	1.18281e+07	1.29511e+07	1.25398e+07	2.38034e+07	1.10623e+07	3.42595e+08	2.3073e+08
	High	[K].GSTSHHLVSR.[K]		1	173	P04114	P04114 [1948-1957]		0	1080.55	4	0.347491	0.0185815	0.54815	139977	288635	332200	457662	2.45205e+07	186042	7.14136e+06	6.14189e+06	1.36287e+06	3.26724e+06	2.54235e+06	12497	2.74319e+07	3.93848e+07	4.62714e+07		3.01656e+06	1.53673e+06	17897.8	17107		62171.1	109311	9.71026e+06	1.62825e+07	9.23801e+06	7.77402e+07	2.53791e+06	4.15938e+06	1.6646e+06	2.55162e+06	1.15012e+07	4.79518e+06	3.2603e+07	7.69119e+07
	High	[K].ITEVALMGHLSCDTK.[E]	1xCarbamidomethyl [C12]	1	42	P04114	P04114 [1101-1115]		0	1674.82	2	0.463426	0.836018	0.531869	6.38985e+06	8.93832e+06	2.52996e+07	5.13348e+06	3.94262e+07	3.34117e+06	1.09066e+06	700118	2.48481e+06	2.49876e+06	1.61187e+06	843660	3.46386e+07	1.11764e+08	4.07774e+07	986688	2.63335e+06	895325	1.04082e+06	548667		1.56856e+06	456647	22911.1	3.27566e+06	3.3506e+06	1.27585e+06	3.05065e+06		2.22834e+06	1.77275e+06	5.75412e+06	1.90894e+06		2.04992e+07
	High	[K].EFNLQNMGLPDFHIPENLFLK.[S]	1xOxidation [M7]	1	20	P04114	P04114 [1260-1280]		0	2532.26	0
	High	[K].LNDLNSVLVMPTFHVPFTDLQVPSCK.[L]	1xCarbamidomethyl [C25]; 1xOxidation [M10]	1	19	P04114	P04114 [3737-3762]		0	2987.5	2	0.67494	4.58126e-17	0.950022			249082													66768.2																			375415
	High	[K].DKDQEVLLQTFLDDASPGDK.[R]		1	30	P04114	P04114 [538-557]		1	2234.08	3	0.171455	0.886716	0.491728	340202	206960	1.31799e+06	438031	374388	704725	126949	293924	128652	316161	393876	723150	1.36849e+06	1.1572e+06	2.42086e+06	846699	2.18864e+06	1.32187e+06	2.02855e+06	850967	3.70231e+06	246623	1.76856e+06	638403	289751	345935	2.43933e+06	1.14173e+06	7897.29	1.00575e+06	181003	871756	598763	3.18716e+06	890866
	High	[K].LLLQMDSSATAYGSTVSK.[R]	1xOxidation [M5]	1	432	P04114	P04114 [1146-1163]		0	1887.94	2	0.301417	0.922557	0.892763	2.74675e+06	6.56885e+06	2.29822e+07	7.78121e+06	1.47118e+07	8.32272e+06	1.72932e+06	5.40843e+06	1.34732e+06	3.92822e+06	1.30814e+06	5.97308e+06	3.38835e+07	7.79105e+07	7.44815e+07	1.39194e+07	7.24362e+06	3.17322e+06	2.06683e+07	9.89798e+06	3.96136e+06	1.27285e+07	4.88478e+06	6.36389e+06	6.38413e+06	1.76704e+07	2.08597e+06	6.56224e+06	2.1816e+06	5.6633e+06	1.32323e+07	1.06863e+07	3.74698e+06	1.11195e+08	5.6371e+07
	High	[R].EYSGTIASEANTYLNSK.[S]		1	414	P04114	P04114 [3508-3524]		0	1847.87	8	0.974651	0.980676	0.974239	1.22573e+07	2.13767e+07	4.41589e+07	1.81405e+07	2.82775e+07	7.04605e+06	9.05839e+06	9.95341e+06	3.01991e+06	5.24133e+06	2.53399e+06	2.22715e+06	3.72993e+07	1.50851e+08	5.71752e+07	7.11594e+06	5.07068e+06	1.93926e+06	9.41485e+06	3.58108e+06	9.67736e+06	1.42091e+07	8.80545e+06	1.34909e+07	1.14244e+07	4.42616e+07	7.19347e+06	8.70796e+06	7.74336e+06	7.86353e+06	1.57107e+07	3.15519e+07	1.90997e+07	1.19366e+08	7.63474e+07
	High	[K].AALTELSLGSAYQAMILGVDSK.[N]	1xOxidation [M15]	1	272	P04114	P04114 [1703-1724]		0	2254.16	18	0.255084	0.582877	0.818499	1.87519e+06	1.86701e+06	3.46594e+06	1.44308e+06	3.40985e+06	548154	179887	307718	569125	1.18471e+06	1.12953e+06	2.28406e+06	4.06293e+06	7.65029e+06	1.13684e+07	4.02201e+06	6.33598e+06	32547.5	1.0128e+07	1.74846e+06	4.45089e+06	2.08815e+06	1.04309e+06	3.15786e+06	5.14495e+06	9.16479e+06	595992	2.47334e+06	2.26215e+06	2.82083e+06	2.63198e+06	9.35503e+06	1.03404e+07	8.55071e+06	4.36461e+06
	High	[K].ALYWVNGQVPDGVSK.[V]		1	510	P04114	P04114 [718-732]		0	1632.84	19	0.787816	0.947411	0.669274	9.5356e+06	1.08821e+07	6.50624e+07	1.41532e+07	5.31421e+07	5.64932e+06	2.79052e+06	2.0885e+06	1.12381e+06	1.41282e+06	2.51961e+06	3.81287e+06	3.11867e+07	1.74275e+08	9.99723e+07	5.77393e+06	9.98931e+06	2.86992e+06	5.13923e+06	5.31833e+06	1.29932e+07	1.93644e+07	5.20117e+06	8.98572e+06	5.92513e+06	3.24001e+07	865451	5.94333e+06	4.64419e+06	7.47011e+06	6.54381e+06	2.54463e+07	1.26511e+07	1.23113e+08	1.56561e+08
	High	[K].ATFQTPDFIVPLTDLR.[I]		1	272	P04114	P04114 [2610-2625]		0	1833.97	0	0.855276	0.998165	0.638966	2.17206e+07	2.34625e+07	4.20963e+07	8.62599e+06	3.57804e+06	3.57797e+06	9.17536e+06	4.79352e+06	4.87514e+06	6.1933e+06	4.72883e+06	5.30333e+06	6.64722e+06	2.31205e+07	1.46356e+07	4.22982e+06	7.3083e+06	1.17426e+07	2.17324e+07	6.37087e+06	7.92281e+06	5.4693e+06	8.00894e+06	5.95291e+06	5.1532e+06	9.91746e+06	1.63279e+06	7.75383e+06	4.66124e+06	5.69373e+06	1.20225e+07	6.2332e+06	4.71773e+06	2.53182e+07	1.71251e+07
	High	[K].KLTISEQNIQR.[A]		1	363	P04114	P04114 [334-344]		1	1329.75	21	0.935504	0.999895	0.983943	8.37741e+07	7.68128e+07	1.06418e+08	7.16404e+07	1.13647e+08	4.78973e+07	4.25606e+07	3.70513e+07	1.70378e+07	2.27574e+07	2.00891e+07	2.18279e+07	1.38082e+08	4.01839e+08	2.44809e+08	2.25314e+07	4.08881e+07	3.28982e+07	3.17621e+07	2.52651e+07	5.09888e+07	3.74975e+07	3.21403e+07	4.39552e+07	4.7784e+07	1.04291e+08	4.27319e+07	8.15672e+07	3.32955e+07	3.82967e+07	5.04277e+07	1.06191e+08	4.7773e+07	5.29786e+08	4.30749e+08
	High	[K].GISTSAASPAVGTVGMDMDEDDDFSK.[W]	1xOxidation [M]	1	36	P04114	P04114 [3996-4021]		0	2619.11	1	0.917577	0.296832	0.511078	631039	1.37038e+06	6.84113e+06	1.56346e+06	5.06137e+06	940268							1.12596e+06	5.7138e+06					55663.7								408629							3.53951e+06	1.13951e+06
	High	[R].VRESDEETQIK.[V]		1	635	P04114	P04114 [4045-4055]		1	1333.66	27	0.897322	0.890266	0.915428	5.80789e+08	5.20402e+08	1.97956e+09	5.2579e+08	4.53102e+08	2.81785e+08	3.41309e+08	1.82575e+08	1.15148e+08	1.41258e+08	1.5705e+08	2.45205e+08	5.92995e+08	3.15152e+09	1.30324e+09	3.97741e+08	2.318e+08	1.96736e+08	5.82823e+08	2.02908e+08	2.91588e+08	5.03009e+08	1.63093e+08	2.46395e+08	3.3588e+08	6.53768e+08	2.7428e+08	2.51585e+08	1.77831e+08	2.02272e+08	4.14784e+08	7.0271e+08	3.19865e+08	2.59631e+09	2.19962e+09
	High	[K].ITEVALMGHLSCDTK.[E]	1xCarbamidomethyl [C12]; 1xOxidation [M7]	1	143	P04114	P04114 [1101-1115]		0	1690.81	7	0.85248	0.93194	0.0817111	1.4961e+07	1.98911e+07	3.80754e+07	1.01145e+07	2.23337e+07	2.79404e+06	2.065e+07	2.60386e+07	4.78498e+06	6.23558e+06	2.95333e+06	5.04587e+06	4.46423e+07	1.08866e+08	1.08326e+08	8.65438e+06	1.67571e+07	2.5139e+06	5.48634e+06	1.16839e+06	1.15895e+07	9.12164e+06	1.73711e+06	1.11918e+07	1.69411e+07	4.60448e+07	2.241e+07	1.53493e+07	7.76815e+06	1.07269e+07	2.03041e+07	5.87915e+06	2.38372e+06	1.83978e+07	2.46807e+07
	High	[K].HIYAISSAALSASYK.[A]		1	145	P04114	P04114 [1838-1852]		0	1581.83	2	0.804383	0.750185	0.685181	1.01615e+06	1.42358e+06	1.61814e+06	1.696e+06	785628	490416	236675	291208	98377.3	758708	345053	86084.2	1.96218e+06	3.93522e+07	2.32519e+06	360228	436726	485025	468003	192848	133637	377208	464901	470247	386024	283846	1.26291e+06	432969	820916	127203	407771	827456	817203	1.33852e+07	1.16862e+06
	High	[R].ITENDIQIALDDAK.[I]		1	332	P04114	P04114 [2151-2164]		0	1558.8	0	0.788924	0.985735	0.977757	5.73012e+06	7.44095e+06	2.76502e+07	8.61462e+06	1.60487e+07	9.10836e+06	5.89523e+06	2.85191e+06	800781	1.24657e+06	1.49648e+06	1.25932e+06	3.01628e+07	1.23197e+08	5.50759e+07	4.87563e+06	3.50066e+06	2.19061e+06	1.61252e+07	4.63712e+06	1.34939e+07	1.304e+07	2.44529e+06	1.09529e+07	6.10881e+06	1.24443e+07	7.02676e+06	5.82373e+06	3.07582e+06	3.91413e+06	4.76519e+06	8.33023e+06	4.74002e+06	9.43029e+07	6.19659e+07
	High	[K].ATVAVYLESLQDTK.[I]		1	218	P04114	P04114 [2475-2488]		0	1537.81	7	0.973684	0.88783	0.760819	2.23021e+06	2.36597e+06	5.06751e+06	1.50037e+06	5.64119e+06	2.99607e+06	326039	664658	241723	827753	1.35864e+06	576185	3.32803e+06	8.22818e+06	6.11982e+06	1.37071e+06	1.18313e+06	437934	1.4142e+06	703647	1.49859e+06	1.90947e+06	1.32952e+06	1.13887e+06	1.14001e+06	5.25605e+06	792011	660904	700126	1.24195e+06	1.48809e+06	1.35078e+06	1.25702e+06	1.16196e+06	9.02245e+06
	High	[K].ALVEQGFTVPEIK.[T]		1	464	P04114	P04114 [2579-2591]		0	1430.79	19	0.0357634	0.446221	0.0341808	5.54025e+06	1.28809e+07	6.63087e+07	1.46984e+07	8.77731e+07	1.30899e+07	5.91339e+06	6.61008e+06	7.9859e+06	6.17979e+06	4.35173e+06	1.28606e+07	9.21931e+07	4.34274e+08	2.36038e+08	1.30585e+07	4.47939e+07	6.76725e+06	3.06007e+07	7.25402e+06	1.98386e+07	2.28647e+07	1.01818e+07	1.53171e+07	1.29885e+07	4.26636e+07	5.82936e+06	1.21384e+07	1.48193e+07	1.83496e+07	2.76397e+07	8.53246e+07	1.35822e+07	6.44817e+08	2.25365e+08
	High	[K].MTSNFPVDLSDYPK.[S]	1xOxidation [M1]	1	572	P04114	P04114 [1189-1202]		0	1629.75	5	0.400858	0.918441	0.878329	2.21472e+07	3.83119e+07	1.11656e+08	4.1758e+07	3.70159e+07	1.48099e+07	3.86651e+06	7.50741e+06	4.31402e+06	1.22792e+07	4.53658e+06	1.8182e+07	1.00123e+08	1.8427e+08	1.7157e+08	3.71602e+07	2.15309e+07	4.65326e+06	2.26983e+07	9.41878e+06	3.51924e+07	2.17127e+07	5.39385e+06	6.78918e+06	3.63681e+06	3.34295e+07	1.1074e+07	1.24333e+07	4.68542e+06	1.11655e+07	2.28887e+07	5.48519e+07	4.73582e+07	2.42485e+08	2.59879e+08
	High	[R].QTIIVVLENVQR.[N]		1	95	P04114	P04114 [2086-2097]		0	1411.83	0	0.728955	0.878996	0.365795	1.37574e+06	1.20765e+06	972491	433124	697450	225249	867034	726561	834692	704650	697345	283943	1.86948e+06	6.75719e+06	1.81145e+06	828625	833317	1.54697e+06	1.96839e+06	570471	2.10815e+06	2.73778e+06	1.17565e+06	1.17736e+06	878384	1.56711e+06	208824	1.05102e+06	1.42348e+06	268969	749396	282070	684316	157764	1.47307e+06
	High	[R].TLADLTLLDSPIK.[V]		1	1003	P04114	P04114 [2013-2025]		0	1399.8	17	0.571407	0.725217	0.640438	2.23121e+07	4.59204e+07	8.96209e+07	2.03674e+07	3.27984e+07	1.75644e+07	1.64766e+07	1.13277e+07	3.82326e+06	4.63956e+06	3.23776e+06	9.65577e+06	1.04974e+08	6.09531e+08	1.8472e+08	1.47233e+07	1.93395e+07	2.41464e+07	6.46611e+07	3.35784e+07	1.88346e+07	2.20344e+07	2.03562e+07	1.15499e+07	9.45257e+06	2.08812e+07	8.84555e+06	6.47629e+06	5.75285e+06	1.47524e+07	3.09182e+07	1.09682e+07	1.32902e+07	3.74701e+08	2.36617e+08
	High	[K].AASGTTGTYQEWK.[D]		1	329	P04114	P04114 [4133-4145]		0	1399.65	6	0.875329	0.821136	0.981536	7.22728e+07	1.01033e+08	3.21681e+08	1.0488e+08	1.74723e+08	6.87181e+07	4.18572e+07	3.61041e+07	1.53801e+07	2.16512e+07	2.89337e+07	4.3028e+07	1.84926e+08	6.86945e+08	3.47956e+08	7.73995e+07	6.16127e+07	3.32886e+07	1.04675e+08	3.94528e+07	6.44999e+07	1.00517e+08	4.1575e+07	4.50786e+07	4.71642e+07	1.4321e+08	2.94486e+07	5.86776e+07	2.94379e+07	5.07151e+07	6.89608e+07	1.14674e+08	5.79393e+07	5.18014e+08	5.32087e+08
	High	[K].LQDFSDQLSDYYEK.[F]		1	380	P04114	P04114 [4499-4512]		0	1750.78	6	0.366129	0.151252	0.996608	3.61672e+06	6.549e+06	3.62817e+07	7.33842e+06	3.55258e+07	4.22469e+06	7.49035e+06	6.93736e+06	6.80206e+06	8.30601e+06	5.21171e+06	2.94037e+06	5.6318e+07	2.0282e+08	1.27589e+08	1.73127e+07	1.1315e+07	2.71849e+06	1.71619e+07	5.23698e+06	1.5553e+07	1.08507e+07	5.43422e+06	1.7874e+07	1.32244e+07	4.27148e+07	1.41084e+07	2.82218e+07	1.04756e+07	1.84799e+07	3.43165e+07	4.75564e+07	2.98137e+07	2.12617e+08	2.41437e+08
	High	[K].LEVANMQAELVAK.[P]	1xOxidation [M6]	1	326	P04114	P04114 [864-876]		0	1431.75	6	0.198384	0.612444	0.659621	4.00385e+07	4.66839e+07	1.30812e+08	4.0119e+07	3.46804e+07	3.05057e+07	3.21433e+07	3.63781e+07	1.97684e+07	2.38488e+07	1.8743e+07	5.26988e+07	1.22757e+08	2.48534e+08	2.34633e+08	7.65259e+07	7.61723e+07	3.08603e+07	1.10504e+08	4.08643e+07	5.02756e+07	5.52802e+07	3.53457e+07	5.08334e+07	4.72863e+07	1.10331e+08	2.82666e+07	5.62144e+07	3.60772e+07	6.69771e+07	7.73897e+07	9.77845e+07	6.82443e+07	2.59043e+07	2.10398e+08
	High	[K].GNVATEISTERDLGQCDRFK.[P]	1xCarbamidomethyl [C16]	1	14	P04114	P04114 [197-216]		2	2296.1	2	0.165495	0.761445	0.454883					3.63072e+06								9.97241e+06	5.3877e+07	8.1803e+06												2.26909e+06					1.15002e+06			1.59542e+07
	High	[K].TQFNNNEYSQDLDAYNTK.[D]		1	334	P04114	P04114 [1985-2002]		0	2164.94	3	0.774525	0.947306	0.303424	4.83824e+06	1.79497e+07	5.85245e+07	1.61691e+07	1.15356e+07	1.49871e+07	7.1074e+06	7.36802e+06	3.87165e+06	3.50519e+06	3.66908e+06	1.99614e+06	3.10044e+07	6.44609e+07	6.34821e+07	7.15707e+06	2.50936e+07	2.59549e+06	7.45557e+06	6.29229e+06	1.22477e+07	2.14518e+07	4.5764e+06	8.27072e+06	7.86413e+06	2.58265e+07	5.35654e+06	6.33688e+06	4.78091e+06	8.81988e+06	1.21318e+07	4.73294e+06	2.86677e+06	3.62312e+07	1.36262e+07
	High	[K].IEGNLIFDPNNYLPK.[E]		1	389	P04114	P04114 [655-669]		0	1746.91	8	0.752817	0.486431	0.991809	1.52975e+07	2.29653e+07	6.17553e+07	1.81354e+07	2.69253e+07	4.13404e+06	3.2505e+06	9.15249e+06	894634	1.21718e+06	6.33214e+06	2.68319e+06	2.69186e+07	9.76614e+07	7.33078e+07	6.40407e+06	5.16835e+06	858728	939841	329296	121324	6.23544e+06	4.8478e+06	1.24005e+07	1.52323e+07	3.38021e+07	5.67595e+06	1.77207e+07	1.25004e+07	1.74278e+07	3.2792e+07	2.63062e+07	1.99385e+07	6.74429e+07	9.26467e+07
	High	[K].SGSSTASWIQNVDTK.[Y]		1	309	P04114	P04114 [2241-2255]		0	1580.76	7	0.423005	0.751873	0.941159	9.2316e+06	1.97492e+07	7.3593e+07	1.52252e+07	2.83003e+07	8.93615e+06	1.20008e+07	9.70087e+06	4.66166e+06	4.29981e+06	7.06254e+06	3.9986e+06	4.45539e+07	1.77691e+08	1.09201e+08	1.56923e+07	4.1198e+07	2.494e+06	1.44544e+07	7.56686e+06	6.95776e+06	3.37919e+07	1.38395e+07	1.16558e+07	1.66882e+07	5.88384e+07	1.8565e+06	1.12638e+07	5.92886e+06	1.54964e+07	2.68627e+07	4.37323e+07	2.48082e+07	3.00246e+08	1.21478e+08
	High	[K].VNWEEEAASGLLTSLK.[D]		1	337	P04114	P04114 [4056-4071]		0	1746.89	2	4.74369e-17	0.0044035	3.36749e-05	68950.2	222776	6.40046e+06	1.44431e+06	10966.5		25869.8	59771.7	5840.87	39657.5	771036	2.45976e+06	9.33475e+06	4.63028e+07	9.06734e+06	5.62032e+06	3.36388e+06	1.2391e+07	2.35377e+07	6.46141e+06	7.22533e+06	1.17137e+06	3.12784e+06	550839	315054	1.95346e+06	29244	67733.8	911010	1.13009e+06	686292	3.29787e+06	1.45576e+06	3.93379e+07	1.57236e+07
	High	[R].NIQEYLSILTDPDGK.[G]		1	112	P04114	P04114 [4447-4461]		0	1705.86	0	0.662992	0.934014	0.971914	1.75338e+06	4.74248e+06	4.87083e+06	2.92472e+06	1.22695e+06	722705	510079	12751	112004	376980	476045	446984	2.82806e+06	1.13323e+07	5.3945e+06	1.83603e+06	2.77446e+06	704946	3.70442e+06	291360	1.78715e+06	1.41737e+06	1.52828e+06	1.25961e+06	1.44515e+06	3.15478e+06	227357	497054	532679	587747	1.6881e+06	2.21877e+06	1.44119e+06	6.47974e+06	5.54777e+06
	High	[R].NLQNNAEWVYQGAIR.[Q]		1	553	P04114	P04114 [4107-4121]		0	1775.88	4	0.973691	0.62465	0.757949	3.75174e+06	2.17245e+06	1.8192e+07	6.60311e+06	7.59792e+06	820695	4.16856e+06	2.76249e+06	969744	1.89386e+06	824729	706519	4.71794e+07	2.12659e+08	7.62166e+07	2.56366e+06	2.91765e+06	1.36118e+06	3.31955e+06	3.01341e+06	2.26579e+06	3.15352e+06	2.53915e+06	5.91906e+06	1.8681e+06	1.74081e+07	570740	4.54897e+06	2.93356e+06	5.08312e+06	7.50722e+06	9.05594e+06	6.54528e+06	1.13584e+08	5.66878e+07
	High	[K].IISDYHQQFR.[Y]		1	451	P04114	P04114 [4487-4496]		0	1306.65	27	0.696811	0.57226	0.569869	6.13166e+07	6.71444e+07	2.09408e+08	8.393e+07	4.51228e+08	2.11412e+07	5.11429e+07	6.08592e+07	1.93492e+07	3.16848e+07	2.57217e+07	3.9152e+07	3.97812e+08	1.46928e+09	8.94107e+08	7.58586e+07	7.8364e+07	1.65627e+07	4.48757e+07	3.37129e+06	7.51087e+07	7.8496e+07	2.14219e+06	8.65676e+07	1.0757e+08	2.66926e+08	1.10515e+08	7.91198e+07	5.58552e+07	7.00354e+07	1.4245e+08	3.1095e+08	1.19253e+08	8.59624e+08	1.11182e+09
	High	[K].SPAFTDLHLR.[Y]		1	333	P04114	P04114 [3980-3989]		0	1156.61	11	0.219126	0.639223	0.283283	7.74836e+06	1.91492e+07	2.15169e+07	5.48407e+06	1.20843e+07	3.97688e+06	1.24684e+07	1.23841e+07	7.58771e+06	2.14901e+07	1.1756e+06	1.992e+06	5.22153e+07	2.02833e+08	1.07187e+08	2.96042e+06	3.63569e+06	1.70185e+06	1.14758e+07	462732	4.23328e+06	1.91429e+06	1.79091e+07	3.32095e+07	2.18667e+07	2.78992e+07	1.90514e+07	5.28109e+06	5.55994e+06	1.76228e+07	1.78341e+07	2.74631e+07	1.67685e+07	1.82981e+08	1.32785e+08
	High	[K].GSTSHHLVSRK.[S]		1	173	P04114	P04114 [1948-1958]		1	1208.65	7	0.824039	0.491568	0.538436	8.19239e+06	510610	635846	867678	2.64607e+07		2.03433e+06	619819	221899	29257.8	708791	808584	1.08552e+07	1.17759e+08	2.03529e+07	60825.2	1.05571e+06	1.60329e+06		1.50357e+06	32360	937181	923381	1.15245e+06	3.0912e+06	3.67929e+06	2.26201e+08	402156	2.0138e+06	1.33602e+06	356515	3.6991e+06	304526	1.52912e+08	4.47591e+06
	High	[K].GMTRPLSTLISSSQSCQYTLDAK.[R]	1xCarbamidomethyl [C16]; 1xOxidation [M2]	1	301	P04114	P04114 [230-252]		0	2560.24	1	0.914453	0.249487	0.826643	2.39094e+06	6.36313e+06	1.32368e+07	6.87284e+06	4.69718e+06	5.68716e+06	446347	125784	25814.3	79728.7	144400	646406	1.60363e+06	1.83867e+07	3.46608e+06	398623	1.27067e+06	755756	1.19583e+06	5.20802e+06	1.72596e+06	8.28556e+06	5.11139e+06	546567	851794	3.0704e+06	345159	1.24182e+06	423127	573070	789274	1.57332e+06	990816	2.00137e+07	5.46451e+06
	High	[K].GNVATEISTERDLGQCDR.[F]	1xCarbamidomethyl [C16]	1	348	P04114	P04114 [197-214]		1	2020.94	8	0.967584	0.825771	0.537989	2.31399e+07	3.92402e+07	1.15254e+08	2.90289e+07	5.86293e+07	2.04768e+07	2.15542e+07	1.74931e+07	4.03712e+06	8.47479e+06	6.19969e+06	8.46823e+06	6.62538e+07	2.79751e+08	1.86774e+08	1.50807e+07	1.25874e+07	5.77758e+06	2.72802e+07	1.69776e+06	1.62399e+07	2.65864e+07	6.64762e+06	2.99477e+07	2.63935e+07	1.0273e+08	1.71127e+07	2.29641e+07	1.04906e+07	2.86456e+07	3.13143e+07	7.70345e+07	3.4262e+07	2.30586e+08	3.15355e+08
	High	[K].RGIISALLVPPETEEAK.[Q]		1	232	P04114	P04114 [158-174]		1	1823.03	1	0.0170257	1.52302e-06	0.564565	9923.67	1.01163e+06	1.63608e+06	2.78827e+06	1.06029e+06	1.00569e+06	204279	36000.1	82252.3	50888.4	50485.2			1.35368e+07	2.72025e+07	2.15544e+06	2.53786e+06	34475			22169.3			7622.99		9132.96	3.18019e+07	4.47581e+07	1.0262e+07	5.23954e+06	1.96018e+06	18282.2	376898	2.81233e+07	1.73716e+07
	High	[K].GTYGLSCQRDPNTGR.[L]	1xCarbamidomethyl [C7]	1	499	P04114	P04114 [1499-1513]		1	1681.77	11	0.810666	0.968587	0.953512	5.37082e+07	4.19755e+07	1.63215e+08	3.42245e+07	9.24551e+07	1.9999e+07	3.11483e+07	2.3757e+07	1.35226e+07	1.18659e+07	2.08537e+07	2.76709e+07	7.86914e+07	2.6034e+08	1.80955e+08	4.15817e+07	2.81923e+07	1.88441e+07	4.97606e+07	1.02919e+07	3.14575e+07	4.35843e+07	1.12555e+07	2.94362e+07	3.50873e+07	1.04589e+08	3.25021e+07	3.2477e+07	2.7889e+07	2.95447e+07	5.14903e+07	9.59123e+07	3.91917e+07	1.14884e+08	2.84781e+08
	High	[K].GMTRPLSTLISSSQSCQYTLDAK.[R]	1xCarbamidomethyl [C16]	1	29	P04114	P04114 [230-252]		0	2544.24	0	4.74369e-17	0.00955707	2.61427e-07	166936	287115	1.62917e+06	1.01118e+06	851810	965593																					106115
	High	[K].LRTSSFALNLPTLPEVK.[F]		1	270	P04114	P04114 [3774-3790]		1	1886.07	1	0.779913	0.886716	0.908599	7.5158e+06	6.57155e+06	1.2576e+07	8.65384e+06	6.1932e+06	3.4411e+06	155841	882615	914893	2.07355e+06	1.4681e+06	166462	5.88485e+06	1.30066e+07	2.24341e+07	907438	6.15401e+06	1.20808e+06	4.20798e+06	260348	1.52834e+06	1.38578e+06	2.03689e+06	1.60251e+06	2.77201e+06	1.14272e+07	2.53359e+06	2.58911e+06	1.03349e+06	2.19578e+06	2.73566e+06	5.29683e+06	8.61799e+06	1.42923e+07	3.40984e+07
	High	[K].IAELSATAQEIIK.[S]		1	1049	P04114	P04114 [4466-4478]		0	1386.78	13	0.0282556	0.795793	0.225701	1.97392e+07	2.31362e+07	1.23598e+08	1.41242e+07	8.78361e+07	1.39114e+07	7.04446e+06	1.21651e+07	3.63643e+06	6.59888e+06	5.8297e+06	1.04275e+07	2.52492e+08	4.2914e+08	1.08258e+08	3.05695e+07	3.93184e+07	1.84391e+07	3.56605e+07	1.93316e+07	3.92027e+07	4.93446e+07	2.43115e+07	1.86955e+07	2.23742e+07	4.69573e+07	1.74141e+07	1.51708e+07	6.87874e+06	8.51671e+06	2.15865e+07	4.31994e+07	1.31148e+07	5.4348e+08	2.3167e+08
	High	[R].LNGEIQALELPQK.[A]		1	310	P04114	P04114 [2450-2462]		0	1452.81	4	0.408232	0.547298	0.21981	3.7273e+06	1.00852e+07	4.87354e+07	9.93467e+06	2.86631e+07	5.48866e+06	2.37822e+06	3.06715e+06	806832	2.25614e+06	4.52601e+06	7.14213e+06	4.04642e+07	1.5032e+08	1.4205e+08	2.3113e+07	4.3797e+06	4.55852e+06	5.09939e+07	4.55384e+06	7.43809e+06	1.09991e+07	6.88975e+06	8.14912e+06	4.22432e+06	4.3155e+07	2.72572e+06	1.36392e+07	4.544e+06	8.27574e+06	1.59113e+07	2.6017e+07	1.26581e+07	2.39467e+08	2.0836e+08
	High	[K].IAIANIIDEIIEK.[L]		1	474	P04114	P04114 [2196-2208]		0	1454.85	1	0.953243	0.925399	0.000182679	7.82605e+06	1.09069e+07	3.94049e+07	1.91042e+07	5.83139e+06	2.3081e+06	2.72036e+06	1.08835e+06	30805	4.03796e+06	7.15102e+06	31995.9	1.89925e+07	6.11536e+07	4.34818e+07	3.6262e+06	2.02155e+07	414306	1.03885e+07	356812	35553.5	4.96616e+06	42472.3	9.18004e+06	1.0451e+07	4.65058e+07	2.659e+06	5.14239e+06	4.23938e+06	2.20425e+06	1.02005e+07	2.20539e+07	7.99008e+06	9.33902e+07	5.44342e+07
	High	[K].IEFEWNTGTNVDTK.[K]		1	1032	P04114	P04114 [1174-1187]		0	1653.78	19	0.978932	0.0908183	0.810217	1.38173e+07	1.51711e+07	5.62343e+07	8.27496e+06	3.44019e+07	8.26988e+06	1.95649e+07	5.77356e+06	1.61913e+06	1.7909e+06	742070	3.62455e+06	3.19039e+07	1.03757e+08	3.96221e+07	5.81694e+06	7.03632e+06	4.25788e+06	1.11961e+07	6.61507e+06	6.93733e+06	1.11935e+07	8.28272e+06	2.07427e+06	2.88506e+06	8.90175e+06	778643	2.21124e+06	1.35133e+06	2.62696e+06	5.24137e+06	3.77631e+06	2.71447e+06	1.48103e+07	1.00735e+07
	High	[K].IVQILPWEQNEQVK.[N]		1	844	P04114	P04114 [577-590]		0	1723.94	20	0.546243	0.933902	0.0967578	2.59381e+07	3.00357e+07	9.04122e+07	1.76026e+07	5.02911e+07	8.25128e+06	4.61916e+06	3.30438e+06	4.47263e+06	6.50775e+06	1.80753e+06	4.91318e+06	4.65516e+07	2.25953e+08	7.64e+07	1.16873e+07	6.59196e+06	5.49464e+06	1.90137e+07	1.25361e+07	1.321e+07	1.25872e+07	1.02206e+07	6.08507e+06	8.54031e+06	2.0697e+07	1.02979e+06	3.96612e+06	8.8528e+06	6.94681e+06	5.20062e+06	1.82469e+07	1.01303e+07	2.78565e+08	1.82435e+08
	High	[R].VLLDQLGTTISFER.[I]		1	385	P04114	P04114 [2296-2309]		0	1591.87	2	0.349548	0.844869	0.890563	3.71846e+06	4.64231e+06	1.35899e+07	2.86082e+06	3.07508e+06	1.15573e+06	1.35306e+06	872487	368437	448860	1.21622e+06	1.17735e+06	7.50352e+06	1.85225e+07	9.55455e+06	3.37173e+06	5.08631e+06	2.30858e+06	5.58038e+06	3.46216e+06	2.85776e+06	3.0324e+06	6.6236e+06	2.04168e+06	2.23992e+06	2.7195e+06	1.84142e+06	1.97579e+06	1.56896e+06	1.31454e+06	2.58371e+06	4.38321e+06	1.71139e+06	4.00253e+07	8.94301e+06
	High	[K].NTLELSNGVIVK.[I]		1	287	P04114	P04114 [2865-2876]		0	1286.73	20	4.60091e-05	0.000731223	0.00135339	2.05033e+06	1.9582e+06	3.48556e+06	1.86607e+06	1.90613e+06	1.52994e+06	378263	631083	358908	330820	312737	1.15559e+07	1.03423e+08	3.05014e+08	1.93943e+08	1.73943e+07	5.58435e+06	3.50639e+06	1.66469e+07	1.37389e+07	7.747e+06	1.6356e+07	4.28161e+06	1.1261e+07	2.54289e+07	6.84947e+07	1.99342e+07	6.55526e+06	8.51123e+06	1.1196e+07	1.22284e+07	3.01181e+07	1.88693e+07	3.3666e+06	1.74991e+08
	High	[K].YGMVAQVTQTLK.[L]	1xOxidation [M3]	1	627	P04114	P04114 [276-287]		0	1354.7	14	0.0977109	0.851147	0.878215	5.03812e+07	1.14041e+08	3.37092e+08	1.30619e+08	1.19375e+08	6.67443e+07	8.38376e+07	6.40426e+07	3.41639e+07	4.70682e+07	3.94404e+07	7.10011e+07	2.16846e+08	6.18471e+08	4.88651e+08	1.17925e+08	1.55898e+08	6.02209e+07	1.85489e+08	8.69569e+07	1.3503e+08	1.88162e+08	1.00666e+08	8.4643e+07	9.16965e+07	3.14687e+08	4.64797e+07	8.01307e+07	5.11234e+07	7.71203e+07	1.01719e+08	1.92607e+08	1.36749e+08	6.19806e+08	8.23643e+08
	High	[K].SVSLPSLDPASAK.[I]		1	418	P04114	P04114 [642-654]		0	1271.68	13	0.848156	0.554996	0.96937	9.99605e+07	1.31081e+08	3.98087e+08	1.43273e+08	1.5405e+08	6.76864e+07	2.48392e+07	2.40433e+07	1.11737e+07	1.85899e+07	1.15916e+07	4.01476e+07	2.844e+08	8.80948e+08	5.15335e+08	6.23772e+07	9.99452e+07	1.93743e+07	4.33512e+07	1.8187e+07	8.39586e+07	1.88538e+08	4.71817e+07	5.65202e+07	4.35518e+07	1.85984e+08	2.2504e+07	2.56818e+07	2.65359e+07	3.34868e+07	8.36049e+07	1.18247e+08	6.37696e+07	1.06197e+09	6.78716e+08
	High	[K].YRITENDIQIALDDAK.[I]		1	108	P04114	P04114 [2149-2164]		1	1877.96	2	0.418124	0.983174	0.580986	61543.1	35282.3	84286.3	215212		1.61376e+06	195079	309867	4987.81			365646	6.04328e+06	1.05719e+07	84043.3	590500	61423.9	49856.4	878126	281659	901796	1.13335e+06	280861		101054	433621	798024	100284	147233	84091.7	141650	29608.3	220135	1.17334e+07	1.50404e+07
	High	[R].TLQGIPQMIGEVIRK.[G]	1xOxidation [M8]	1	232	P04114	P04114 [805-819]		1	1698.96	1	0.00946455	0.462842	0.974755	1.77802e+06	3.5392e+06	3.62235e+06	5.17392e+06	4.6503e+06	3.58571e+06	3.52566e+06	3.64625e+06	43441	216581	191634	8.27499e+06	1.09047e+07	6.05517e+07	2.81008e+07	1.6068e+07	1.80098e+07	7.18123e+06	2.22561e+07	4.73103e+06	2.71562e+07	1.25839e+07	1.56423e+07	633232	595399	2.29798e+06	3.5665e+06	1.53816e+06	654469	1.3996e+06	1.53425e+06	2.93586e+06	545030	2.09666e+08	3.89795e+07
	High	[K].LEVANMQAELVAK.[P]		1	96	P04114	P04114 [864-876]		0	1415.76	1	0.29226	0.206208	0.231915	5.17783e+06	1.34995e+07	5.49348e+07	1.37405e+07	5.88292e+07	1.15581e+07	792615	508271	63975.7	415787	425170	257798	5.39267e+07	1.16573e+08	8.21666e+07	1.60635e+06	1.08174e+06	320001	1.5589e+06	529401	953589	1.82848e+06	1.66743e+06	1.51388e+06	3.53213e+06	8.51887e+06	2.22607e+06	448324	1.17982e+06	711256	2.48169e+06	9.14762e+06	2.76087e+06	2.55038e+08	1.15396e+08
	High	[R].KGNVATEISTER.[D]		1	110	P04114	P04114 [196-207]		1	1304.68	4	0.908722	0.975154	0.901194	5.25739e+07	2.67168e+07	3.98139e+07	1.88795e+07	3.34821e+07	1.53412e+07	1.19548e+07	9.7988e+06	1.46554e+07	2.22125e+07	1.03541e+07	1.60127e+07	1.13653e+07	2.87249e+07	2.69556e+07	1.01808e+07	1.6968e+07	9.47991e+06	8.28724e+06	1.39372e+07	7.00936e+06	1.30988e+07	7.3699e+06	1.51459e+07	9.21704e+06	2.36005e+07	2.01822e+07	1.72926e+07	2.75741e+07	1.97733e+07	1.47957e+07	1.96173e+07	1.28449e+07		2.03652e+07
	High	[K].AEPLAFTFSHDYK.[G]		1	225	P04114	P04114 [1935-1947]		0	1525.73	6	1.20703e-06	0.81726	0.324672	638809	890270	3.00069e+06	2.0412e+06	2.9762e+07	3.86273e+06	6.30782e+06	8.71376e+06	183067	503253	224064	7.56366e+06	1.50885e+08	4.93872e+08	1.85828e+08	1.61522e+07	1.18736e+07	9.53168e+06	2.87612e+07	4.6334e+06	2.84573e+07	2.76805e+07	1.31458e+07	1.03902e+06	1.7208e+06	4.45252e+06	3.38089e+06	533555	905440	602406	1.36588e+06	2.12345e+07	8.79761e+06	1.81573e+08	1.72015e+08
	High	[K].AGHIAWTSSGK.[G]		1	358	P04114	P04114 [2916-2926]		0	1114.56	14	0.697385	0.150187	0.993506	7.88374e+06	3.89155e+06	7.13091e+07	4.29754e+06	1.25832e+08	8.61007e+06	4.75438e+07	3.35069e+07	1.15385e+07	1.46664e+07	1.57009e+07	1.04748e+07	1.11514e+08	4.34734e+08	2.2129e+08	2.45289e+07	2.49905e+07	6.63273e+06	5.81553e+06	3.63331e+06	1.30186e+07	2.41099e+07	4.21013e+06	3.33049e+07	4.16036e+07	9.43316e+07	2.81357e+07	3.86538e+07	3.37197e+07	2.56322e+07	5.18124e+07	1.26599e+08	3.3325e+07	3.4822e+07	2.54307e+08
	High	[K].PQEFTIVAFVK.[Y]		1	110	P04114	P04114 [2049-2059]		0	1278.71	5	0.976166	0.579434	0.977757	3.18793e+06	2.06544e+06	1.16284e+07	1.70267e+06	4.02095e+06	1.23389e+06		1.0464e+06	322723	1.18138e+06	131794	725097	4.64863e+06	6.17761e+06	7.12644e+06	1.51766e+06	1.66697e+06	377769	5.43387e+06	267550	218049	2.40528e+06	65575.4	1.55944e+06	29727.4	1.56534e+06		42871.7	54102	601369	1.13087e+06	3.17612e+06	284051	4.33275e+06	7.00801e+06
	High	[K].LEVLNFDFQANAQLSNPK.[I]		1	42	P04114	P04114 [2801-2818]		0	2048.04	0	0.983422	0.985476	0.958204	47177.6		208310			4483.53			1303.43	42506.1				188268		49585.3						1598		11221.2		270792	72457.4	16525	46364.8	32980.7	47574.8	3730.22	227823	49356.4	454061
	High	[K].VPLLLSEPINIIDALEMR.[D]	1xOxidation [M17]	1	58	P04114	P04114 [2026-2043]		0	2052.14	0	0.49926	0.144894	0.821426			3.3911e+06										1.11469e+06	5.26385e+06	1.10064e+06											768340								1.98851e+06	2.62999e+06
	High	[K].LLLQMDSSATAYGSTVSK.[R]		1	321	P04114	P04114 [1146-1163]		0	1871.94	3	0.734964	0.894666	0.282564	1.52958e+06	2.7698e+06	1.56751e+07	3.4321e+06	1.38643e+07	2.15723e+06	179132	221926	37267	186750	187664	301255	9.15018e+06	3.48548e+07	6.86909e+06	591448	291660	436939	1.59957e+06	1.37311e+06	671465	827177	627156	563382	1.07009e+06	3.87719e+06	1.7402e+06	2.25092e+06	386165	472398	1.28379e+06	2.49336e+06	707839	2.44105e+07	1.3119e+07
	High	[K].FSVPAGIVIPSFQALTAR.[F]		1	391	P04114	P04114 [3869-3886]		0	1874.05	9	0.946538	0.979254	0.854997	7.33206e+06	1.46663e+07	3.44408e+07	8.91437e+06	3.91517e+06	2.65797e+06	6.27372e+06	2.17027e+06	151917	1.45261e+06	1.24174e+06	2.05059e+06	6.57463e+06	3.06836e+07	1.39132e+07	3.05819e+06	4.42501e+06	2.92774e+06	1.29917e+07	1.77277e+06	1.99516e+06	274042	2.40054e+06	4.05213e+06	3.60182e+06	9.44896e+06	2.65571e+06	3.68378e+06	1.23641e+06	2.86626e+06	4.70617e+06	5.09331e+06	2.77826e+06	2.42252e+07	1.89258e+07
	High	[K].AVSMPSFSILGSDVR.[V]		1	30	P04114	P04114 [3277-3291]		0	1565.8	2	0.000973637	0.738743	0.00557146	1.23825e+06	1.90982e+06	2.98465e+06	1.76588e+06	5.24026e+06	588531						39466.3	249901	54936.6		49958.5	85624.4	102302			249446						1.04832e+06								5463.45
	High	[R].GIISALLVPPETEEAK.[Q]		1	66	P04114	P04114 [159-174]		0	1666.93	0	0.664656	0.968587	0.9851			498837	154369		27258.7	20302.5	68225.2	8003.74	13318.5	12090.6	12962.7	426885	2.22307e+06	401310	29065.5	32342.3										72592.8				6088.05	62844.4		10050.9	99058.3
	High	[K].AVSMPSFSILGSDVR.[V]	1xOxidation [M4]	1	474	P04114	P04114 [3277-3291]		0	1581.79	7	0.0530755	0.38835	0.25702	2.34106e+06	7.35307e+06	9.26782e+06	4.03728e+06	1.95299e+07	2.32358e+06	2.42983e+06	2.05267e+06	1.71908e+06	3.82566e+06	1.35334e+06	8.50003e+06	2.54622e+07	1.19402e+08	1.12229e+08	2.82763e+06	1.28054e+07	2.72422e+06	3.07659e+06	8.57234e+06	2.96185e+06	4.42798e+06	8.42606e+06	6.40484e+06	7.87957e+06	2.38592e+07	2.01785e+06	4.27499e+06	3.89717e+06	4.45788e+06	6.27532e+06	8.89126e+06	1.39712e+07	1.57159e+08	5.14701e+07
	High	[K].DSYDLHDLK.[I]		1	290	P04114	P04114 [2187-2195]		0	1105.52	17	0.996845	0.928328	0.251239	5.26071e+07	6.57918e+07	1.14637e+08	4.92096e+07	5.42442e+07	5.45263e+07	4.07155e+07	2.9004e+07	1.62922e+07	2.10832e+07	1.66988e+07	2.12893e+07	1.02206e+08	3.27437e+08	2.50552e+08	4.01492e+07	4.09141e+07	2.07418e+07	8.25759e+07	9.11823e+06	4.0876e+07	3.69757e+07	1.31415e+07	4.35998e+07	3.78001e+07	1.23255e+08	2.92734e+07	4.78023e+07	2.75725e+07	3.69392e+07	5.02739e+07	8.41967e+07	5.18257e+07	5.85844e+07	3.12813e+08
	High	[K].SVGFHLPSR.[E]		1	194	P04114	P04114 [1325-1333]		0	999.537	6	0.98098	0.079988	0.959482	6.55043e+06	1.01841e+07	1.0248e+07	4.87363e+06	3.57954e+07	5.20137e+06	1.15197e+07	1.32863e+07	4.93235e+06	6.87431e+06	4.49254e+06	2.13554e+06	1.097e+08	3.34027e+08	1.87395e+08	2.0304e+06	5.90715e+06	2.32687e+06	9.87378e+06	5.44534e+06	4.62531e+06	6.13279e+06	4.08096e+06	2.21922e+07	3.05368e+07	5.96775e+07	2.28474e+07	1.15119e+07	1.42445e+07	1.30626e+07	1.84974e+07	6.74449e+07	2.94663e+07	1.8127e+07	2.58014e+08
	High	[K].SNTVASLHTEK.[N]		1	732	P04114	P04114 [2854-2864]		0	1186.61	22	0.685359	0.985164	0.845118	6.13842e+08	3.19999e+08	1.56209e+09	3.12667e+08	1.06688e+09	2.25527e+08	3.35343e+08	2.50335e+08	1.21124e+08	1.28363e+08	2.11197e+08	3.92008e+08	6.03294e+08	2.64537e+09	1.30623e+09	6.04198e+08	3.90938e+08	1.69298e+08	4.75904e+08	2.26367e+08	3.21627e+08	3.8487e+08	1.49209e+08	2.42408e+08	4.06906e+08	6.72625e+08	3.27101e+08	2.76969e+08	2.27318e+08	2.97317e+08	4.06884e+08	6.51882e+08	3.55258e+08	4.35078e+09	1.91501e+09
	High	[R].VAWHYDEEK.[I]		1	104	P04114	P04114 [1165-1173]		0	1176.53	3	0.952186	0.949239	0.23526	1.04118e+07	1.78972e+07	2.10699e+07	1.75999e+07	2.52256e+07	8.32371e+06	7.65707e+06	6.50925e+06	4.39973e+06	6.16222e+06	3.90181e+06	4.97011e+06	2.20313e+07	5.87274e+07	4.01033e+07	4.14636e+06	7.18769e+06	4.51184e+06	7.50722e+06	3.30677e+06	5.53949e+06	7.06913e+06	2.99041e+06	5.82073e+06	7.50752e+06	9.51107e+06	3.3479e+06	9.65062e+06	6.28928e+06	5.84515e+06	7.38102e+06	1.10924e+07	5.97778e+06	4.0842e+07	4.53918e+07
	High	[K].HVAEAICK.[E]	1xCarbamidomethyl [C7]	1	737	P04114	P04114 [255-262]		0	927.472	43	0.268952	0.597486	0.390847	1.22702e+08	1.22121e+08	7.47423e+08	1.17417e+08	1.05233e+09	6.22945e+07	2.95085e+08	1.55517e+08	8.51942e+07	1.04602e+08	1.34816e+08	1.28433e+08	7.7389e+08	6.88086e+08	1.23662e+09	2.25577e+08	2.0123e+08	1.20285e+08	2.44972e+08	2.33851e+07	1.71622e+08	2.46795e+08	5.56415e+07	2.10061e+08	3.03619e+08	5.75214e+08	1.73581e+08	1.69745e+08	1.23662e+08	1.38585e+08	3.07385e+08	5.85019e+08	2.15925e+08	1.00608e+09	8.59226e+08
	High	[K].GTFAHRDFSAEYEEDGK.[Y]		1	25	P04114	P04114 [3947-3963]		1	1958.85	1	4.74369e-17	4.58126e-17	3.66332e-17																				79159.8							3.63567e+06							7.66597e+07	1.6307e+06
	High	[K].WNFYYSPQSSPDK.[K]		1	583	P04114	P04114 [4022-4034]		0	1618.72	3	0.931029	0.883501	0.912912	5.4023e+06	8.36257e+06	2.84602e+07	8.65989e+06	2.65029e+07	4.51633e+06	7.19201e+06	5.19323e+06	2.20102e+06	2.46564e+06	4.12863e+06	2.31766e+06	4.8004e+07	1.32503e+08	5.37782e+07	5.27527e+06	7.97607e+06	1.45145e+06	7.17064e+06	1.69607e+06	3.87348e+06	5.91429e+06	2.88467e+06	1.71578e+07	8.29551e+06	2.90484e+07	1.372e+06	5.27778e+06	4.70209e+06	5.6037e+06	8.2106e+06	2.13248e+07	1.15735e+07	1.74712e+08	1.13979e+08
	High	[K].VELEVPQLCSFILK.[T]	1xCarbamidomethyl [C9]	1	114	P04114	P04114 [80-93]		0	1674.91	0	0.942912	0.826799	0.978613	3.28007e+06	6.4438e+06	9.70622e+06	2.05176e+06	1.37645e+06	761952	1.54996e+06	66098.6		464925	427066	628555	2.33279e+06	5.80106e+06	3.83671e+06	1.11062e+06		1.25464e+06	4.80255e+06	1.06355e+06	1.2234e+06		1.06267e+06	846775	1.22351e+06	3.09218e+06	506617	1.11028e+06	300859	885920	1.25049e+06	1.68579e+06	602105	5.8101e+06	4.98635e+06
	High	[R].EVGTVLSQVYSK.[V]		1	162	P04114	P04114 [4223-4234]		0	1309.7	11	0.272666	0.950531	0.658562	1.97568e+07	1.97753e+07	3.10209e+07	1.28971e+07	1.82806e+07	1.2459e+07	1.14184e+07	6.94177e+06	5.0511e+06	6.88963e+06	4.27931e+06	3.16964e+06	1.95554e+07	6.63088e+07	4.695e+07	6.22262e+06	5.44099e+06	2.30202e+06	268650	603209	6.23205e+06	3.36642e+06	1.38122e+06	1.15247e+07	1.26819e+07	3.30848e+07	8.99261e+06	1.30662e+07	1.22083e+07	1.58462e+07	1.83509e+07	2.37472e+07	1.14923e+07	9.68805e+07	5.86304e+07
	High	[R].YEVDQQIQVLMDK.[L]		1	31	P04114	P04114 [2348-2360]		0	1608.79	0	0.982276	0.647823	0.995231							7691.31	21619.6			14642	23955.5		1.07145e+06		5761.73	14987.8	21382.8		40476	89026	88345	11761.7	47082		61673.4	50141.9	48424.5	31568.2	58638	37297.8		39123.3
	High	[K].LTISEQNIQR.[A]		1	340	P04114	P04114 [335-344]		0	1201.65	8	0.835025	0.999895	0.998201	6.73028e+07	1.20971e+08	4.63734e+08	9.59126e+07	1.75323e+08	6.75148e+07	5.27404e+07	4.64757e+07	1.15245e+07	2.45987e+07	3.12655e+07	6.66603e+07	1.89226e+08	5.98547e+08	3.85045e+08	6.69243e+07	6.98753e+07	3.97171e+07	1.12626e+08	6.96947e+07	7.62445e+07	7.84963e+07	4.05433e+07	6.14494e+07	6.6334e+07	2.82491e+08	5.178e+07	7.79253e+07	4.41355e+07	5.53496e+07	8.51279e+07	1.90076e+08	1.00367e+08	8.74967e+07	5.72297e+08
	High	[K].ENFAGEATLQR.[I]		1	488	P04114	P04114 [3548-3558]		0	1235.6	13	0.815633	0.996484	0.679947	1.47636e+08	2.24505e+08	4.91519e+08	1.96901e+08	2.45746e+08	1.02578e+08	6.57096e+07	7.50743e+07	1.22959e+07	3.76364e+07	3.1e+07	4.66091e+07	3.08648e+08	7.67068e+08	5.78896e+08	1.39392e+08	9.33004e+07	2.63602e+07	1.35703e+08	5.67715e+07	1.0276e+08	1.25558e+08	3.97461e+07	8.2739e+07	1.09426e+08	4.04789e+08	6.82092e+07	9.11681e+07	4.17873e+07	1.25712e+08	1.28702e+08	8.61564e+06	5.01333e+06	1.2185e+09	2.01955e+07
	High	[K].ATGVLYDYVNK.[Y]		1	368	P04114	P04114 [4077-4087]		0	1242.64	13	0.869889	0.911489	0.968198	4.48047e+07	9.70498e+07	3.59127e+08	1.22026e+08	1.82386e+08	4.61207e+07	4.51239e+07	3.32864e+07	6.80608e+06	1.49038e+07	7.88747e+06	4.02392e+07	2.72623e+08	8.76072e+08	4.9604e+08	9.06134e+07	1.31132e+08	9.23228e+06	4.08569e+07	2.41313e+07	4.86827e+07	4.56016e+07	2.15714e+07	2.81232e+07	7.4986e+07	2.34154e+08	3.65191e+07	2.622e+07	1.16447e+07	3.53226e+07	1.08818e+08	1.60568e+08	8.70106e+07	9.60546e+08	5.78732e+08
	High	[K].NSEEFAAAMSR.[Y]		1	258	P04114	P04114 [118-128]		0	1212.53	11	0.573073	0.419639	0.856721	4.54227e+06	1.05037e+07	2.50396e+07	8.19704e+06	2.98753e+07	1.33366e+07	2.16212e+06	1.39006e+06	1.19036e+06	1.68073e+06	669876	3.54593e+06	7.68468e+06	1.88136e+07	3.29707e+07	1.60482e+06	1.43521e+06	1.18906e+06	1.21808e+07	5.02494e+06	2.12086e+07	8.23195e+06	1.09615e+07	1.97935e+06	2.00274e+06	6.25708e+06	1.87754e+06	1.36057e+06	1.36401e+06	1.88751e+06	2.26532e+06	4.46982e+06	1.34967e+06	7.36859e+07	1.1832e+07
	High	[R].SEYQADYESLR.[F]		1	499	P04114	P04114 [1600-1610]		0	1360.6	11	0.852265	0.93336	0.927979	6.93603e+07	1.04268e+08	2.45644e+08	6.17154e+07	1.39534e+08	5.5713e+07	4.43995e+07	4.22022e+07	1.38077e+07	2.47909e+07	2.01176e+07	3.47029e+07	1.45042e+08	4.89821e+08	3.29324e+08	5.38515e+07	6.51737e+07	2.66682e+07	8.12073e+07	2.79723e+07	1.0543e+08	4.61156e+07	3.18472e+07	6.46727e+07	7.41928e+07	2.24143e+08	4.50601e+07	5.79907e+07	4.29969e+07	4.3727e+07	9.20542e+07	1.72294e+08	9.56671e+07	5.84204e+08	4.06136e+08
	High	[R].DFSAEYEEDGK.[Y]		1	193	P04114	P04114 [3953-3963]		0	1289.52	3	0.950488	0.987034	0.790161	7.32808e+07	6.22775e+07	5.44049e+07	4.69925e+07	8.98938e+07	4.01726e+07	2.70685e+07	2.15761e+07	2.32661e+07	3.77919e+07	2.1751e+07	1.84217e+07	4.3279e+07	7.72196e+07	8.30463e+07	2.82915e+07	3.88588e+07	3.78427e+07	5.34428e+07	1.83217e+07	2.66008e+07	4.33275e+07	2.13083e+07	3.89864e+07	3.47965e+07	5.78133e+07	2.42929e+07	3.76653e+07	3.78657e+07	3.62332e+07	3.23916e+07	3.53343e+07	2.97957e+07	8.42406e+07	8.58308e+07
	High	[K].PTVSSSMEFK.[Y]	1xOxidation [M7]	1	115	P04114	P04114 [3452-3461]		0	1128.52	3	0.525248	0.4602	0.819896	1.46764e+07	2.36806e+07	2.35442e+07	9.63041e+06	8.74411e+06	4.4082e+07	8.54137e+07	3.74616e+07	2.60942e+07	3.12394e+07	3.87024e+07	1.86402e+07	3.55573e+07	2.98835e+07	5.76816e+06	2.86647e+07	5.11978e+07	4.31454e+07	4.73759e+07	4.07576e+07	5.09767e+07	5.12703e+07	2.14887e+07	4.1426e+07	4.66991e+07	1.90598e+07	4.62509e+07	6.59085e+07	4.91881e+07	4.6453e+07	5.21363e+07	5.60214e+07	4.62095e+07	4.77311e+07	8.69822e+06
	High	[R].VNQNLVYESGSLNFSK.[L]		1	351	P04114	P04114 [2970-2985]		0	1798.9	5	0.873905	0.854994	0.564565	2.55907e+06	4.95022e+06	1.36374e+07	4.83204e+06	1.79241e+07	3.68743e+06	1.28249e+06	1.38644e+06	952181	808547	840643	1.70253e+06	2.2794e+07	3.36777e+07	3.15352e+07	2.55137e+06	2.75161e+06	619368	5.85022e+06	3.68248e+06	1.78919e+06	4.67769e+06	3.44451e+06	3.36059e+06	3.65537e+06	1.71326e+07	3.914e+06	3.5234e+06	1.99568e+06	2.91805e+06	6.35283e+06	1.67189e+07	6.11005e+06	8.28521e+07	4.4132e+07
	High	[R].DAVEKPQEFTIVAFVK.[Y]		1	41	P04114	P04114 [2044-2059]		0	1820.98	1	0.00160268	0.322111	0.00157225			412733										451836		738673	2575.42		3898.27	27961.3	12020.8	5481.54		4030.45	181668	97511.6	260961				46699.7		169077	70540.3	8.22596e+06
	High	[K].LSQLQTYMIQFDQYIK.[D]	1xOxidation [M8]	1	124	P04114	P04114 [2171-2186]		0	2035.02	1	0.889627	0.733504	0.899092	222974	122081	698825	192554	135760	21620.8	82982.9	46767.5	47175.8	156147	61443.4	171672	1.64041e+06	5.20948e+06	1.48157e+06	520578	258003	41353.9	229679	63815.1	81304.4	100676	151857	129592	278248	852357	475102	120311	293755	245490	167762	259081	116253	3.09875e+06	1.02977e+06
	High	[R].SGVQMNTNFFHESGLEAHVALK.[A]	1xOxidation [M5]	1	40	P04114	P04114 [897-918]		0	2432.17	1	0.761668	0.871321	0.0292093	354166	134403	654005	115349	593411	113659	112819	107585	39889.1	21316.2		95505.6	4.50588e+06	1.81059e+07	413707	213692	267737	51930.1	249684	23844.4	246272	400811	55073.3	65006.4	21961	173401	654167	44658.3	155700	64485.9	6637.81	1.15039e+06	476159	2.67728e+07	1.00759e+07
	High	[K].LDVTTSIGRR.[Q]		1	153	P04114	P04114 [3690-3699]		1	1117.63	4	0.307816	0.804873	0.601582	2.53689e+07	4.15074e+07	5.79239e+07	1.89145e+07	6.61787e+07	9.2096e+06	1.62127e+07	2.07391e+07	4.30723e+06	8.06157e+06	1.05324e+07	1.42473e+07	8.22199e+07	2.5103e+08	1.8138e+08	3.09228e+07	3.35297e+07	1.57072e+07	3.82961e+07	4.89584e+06	2.24303e+07	3.18338e+07	1.18458e+07	2.20497e+07	2.40702e+07	8.56576e+07	2.70381e+07	2.30741e+07	1.2189e+07	1.99194e+07	3.05906e+07	6.95759e+07	3.57783e+07	2.73731e+08	2.52551e+08
	High	[K].LVELAHQYK.[L]		1	284	P04114	P04114 [2361-2369]		0	1100.61	18	0.911665	0.627678	0.781878	4.62239e+07	4.67727e+07	9.35865e+07	3.3946e+07	1.07121e+08	2.21952e+07	2.58062e+07	1.76264e+07	1.04662e+07	1.37628e+07	1.59304e+07	1.70961e+07	1.02155e+08	4.50695e+08	2.01412e+08	1.45425e+07	3.82631e+07	1.235e+07	4.15646e+07	8.05088e+06	2.18016e+07	2.84552e+07	1.05576e+07	4.48422e+07	5.48605e+07	1.03986e+08	3.72759e+07	4.16139e+07	3.34108e+07	2.52741e+07	3.65869e+07	9.97094e+07	4.73261e+07	5.81322e+08	3.2913e+08
	High	[R].SPSQADINK.[I]		1	270	P04114	P04114 [568-576]		0	959.479	7	0.751246	0.450218	0.767613	1.34985e+07	2.8989e+07	7.02697e+07	1.39147e+07	4.35971e+07	2.24797e+07	4.1699e+07	1.25875e+07	1.83137e+07	9.55065e+06	1.52741e+07	4.6296e+06	1.09671e+07	3.76082e+07	1.5231e+07	9.00671e+06	8.43248e+06	1.02967e+07	4.79719e+06	9.65915e+06	7.2595e+06	1.77345e+07	9.48242e+06	9.40285e+06	7.40737e+06	1.33979e+07	7.62009e+06	9.68478e+06	7.01806e+06	7.32126e+06	1.31094e+07	1.28602e+07	1.03171e+07	1.01442e+08	1.35234e+07
	High	[K].SHDELPR.[T]		1	567	P04114	P04114 [3238-3244]		0	853.416	19	0.681079	0.342783	0.0941783	1.65992e+08	7.76071e+07	4.48658e+08	8.92934e+07	1.14268e+09	2.67681e+07	3.9353e+08	2.02492e+08	1.00158e+08	1.74206e+08	1.78806e+08	1.57241e+08	3.33952e+08	3.59091e+08	1.51553e+08	4.36178e+08	2.44249e+08	1.43879e+08	4.06345e+08	4.30561e+07	1.96332e+08	3.19847e+08	3.10319e+07	3.37318e+08	5.10467e+08	2.31115e+08	3.52804e+08	3.28001e+08	2.31632e+08	2.58476e+08	4.9992e+08	1.03129e+09	4.45879e+08	5.96434e+08	2.85704e+08
	High	[K].GFEPTLEALFGK.[Q]		1	548	P04114	P04114 [696-707]		0	1308.68	10	0.331669	0.961931	0.656032	1.96033e+07	3.04281e+07	7.37094e+07	2.311e+07	6.42265e+06	4.41592e+06	8.35716e+06	6.64168e+06	4.13357e+06	5.34309e+06	4.26254e+06	5.24771e+06	1.57294e+07	2.30201e+08	2.58177e+07	7.35181e+06	1.26471e+07	1.66741e+07	3.15061e+07	1.40009e+07	1.07085e+07	1.19791e+07	1.21693e+07	6.16652e+06	7.00487e+06	1.14984e+07	6.86324e+06	7.79014e+06	4.62244e+06	5.61573e+06	1.30401e+07	9.55536e+06	5.67918e+06	9.35597e+06	4.7648e+07
	High	[K].INNQLTLDSNTK.[Y]		1	439	P04114	P04114 [2877-2888]		0	1360.71	12	0.757741	0.892267	0.993275	7.77947e+07	7.4857e+07	2.56561e+08	8.73278e+07	9.82203e+07	6.13025e+07	4.0661e+07	5.47866e+07	1.59515e+07	2.40049e+07	2.3037e+07	5.76501e+07	9.49413e+07	2.30251e+08	2.21088e+08	7.79151e+07	5.36419e+07	1.86504e+07	7.66647e+07	2.01278e+07	8.43063e+07	6.78455e+07	4.9567e+07	4.49767e+07	4.29928e+07	1.37402e+08	4.12471e+07	7.3246e+07	3.2168e+07	4.98887e+07	6.29513e+07	1.22039e+08	6.16037e+07	2.96483e+08	2.96698e+08
	High	[R].YEVDQQIQVLMDK.[L]	1xOxidation [M11]	1	97	P04114	P04114 [2348-2360]		0	1624.79	5	0.859305	0.710994	0.9306	1.15367e+06	1.23712e+06	2.42949e+06	990469	766054	769412	459526	593766	454351	1.02627e+06	562998	376839	7.5204e+06	1.56244e+07	7.24379e+06	785547	512774	184210	2.08259e+06	189683	1.1742e+06	1.75095e+06	1.24934e+06	1.40574e+06	1.50215e+06	7.94945e+06	966731	2.34252e+06	1.30982e+06	924525	2.02238e+06	5.04772e+06	1.14886e+06	2.72465e+07	1.42512e+07
	High	[K].MTSNFPVDLSDYPK.[S]		1	38	P04114	P04114 [1189-1202]		0	1613.75	0	2.75038e-05	4.60524e-08	0.00107131	1.67306e+06	3.58333e+06	1.42538e+07	4.71398e+06	2.18497e+07	2.4313e+06		18757.2					531205	1.84505e+06	709183	48279.9	27317.8			14189.2		83121.6		16133.5	104188	130608	1.05385e+06	44323.8		19369	35808.1	83656.6	87875.5	3.39736e+06	460825
	High	[K].AEFTGRHDAHLNGK.[V]		1	78	P04114	P04114 [3015-3028]		1	1552.76	4	0.880086	0.951604	0.995498	2.31167e+06	4.41602e+06	1.18395e+07	1.21564e+06	2.12088e+07	4.37125e+06	5.1656e+06	2.31975e+06	1.14234e+06	1.8415e+06	2.86525e+06	2.12416e+06	2.69334e+07	5.81483e+08	3.57816e+07	3.62832e+06	1.82465e+06	3.99976e+06	1.00094e+06	3.36292e+06	3.99553e+06	6.44293e+06	3.16037e+06	3.22141e+06	4.87157e+06	4.57861e+06	1.76584e+08	1.43795e+06	2.62529e+06	1.55747e+06	3.45968e+06	7.16592e+06	3.1576e+06	3.51588e+08	2.64385e+07
	High	[K].SLDEHYHIR.[V]		1	42	P04114	P04114 [2211-2219]		0	1169.57	1	4.74369e-17	4.58126e-17	3.66332e-17													879379	3.9571e+07	5.02966e+06										294856		1.87895e+07		493554					5.84891e+06	1.01144e+07
	High	[K].KITEVALMGHLSCDTK.[E]	1xCarbamidomethyl [C13]; 1xOxidation [M8]	1	12	P04114	P04114 [1100-1115]		1	1818.91	1	0.259108	0.740448	0.937839	413230	342240		1.26174e+06	1.49418e+06			215759		466095	297365		2.41232e+06	1.32735e+07	2.40041e+06				135350		346780	1.33391e+06		660771	841914	1.33298e+06	894045	244800	103456	494697	728043		187001	4.94221e+06	3.05552e+06
	High	[R].TLQGIPQMIGEVIR.[K]	1xOxidation [M8]	1	217	P04114	P04114 [805-818]		0	1570.86	6	0.737351	0.917831	0.19092	704980	1.00806e+06	6.40676e+06	857806	2.34706e+06	595719	459609	1.14329e+06	154638	341457	375686	503256	6.56891e+06	2.64466e+07	1.65697e+07	723036	1.38239e+06	565486	2.12429e+06	1.48079e+06	1.59387e+06	1.44573e+06	1.12051e+06	686340	675803	1.56154e+06	1.63263e+06	837644	618241	1.0199e+06	930177	1.86673e+06	715787	2.47772e+07	1.40627e+07
	High	[K].LATALSLSNK.[F]		1	301	P04114	P04114 [3395-3404]		0	1017.59	18	0.858671	0.985735	0.86778	1.48473e+08	2.49353e+08	4.9266e+08	2.24989e+08	2.7051e+08	1.07461e+08	1.40227e+08	1.46807e+08	3.33256e+07	5.96167e+07	5.27636e+07	1.15396e+08	7.53258e+08	1.54198e+09	9.12931e+08	1.44547e+08	1.48015e+08	9.79439e+07	2.21648e+08	4.70049e+07	1.61529e+08	1.84072e+08	1.18419e+08	1.09763e+08	1.87992e+08	3.6171e+08	1.87278e+08	1.13205e+08	5.07588e+07	1.28248e+08	1.66933e+08	2.4928e+08	1.6854e+08	1.25226e+09	7.02323e+08
	High	[K].QTEATMTFK.[Y]		1	232	P04114	P04114 [1044-1052]		0	1056.5	6	0.672433	0.94708	0.919916	6.71817e+07	1.09542e+08	2.78531e+08	9.07227e+07	2.08194e+08	7.66113e+07	4.30186e+07	4.57533e+07	1.96787e+07	3.09091e+07	3.43243e+07	3.84048e+07	2.12753e+08	6.20094e+08	4.35493e+08	8.23251e+07	8.79443e+07	4.81169e+07	1.66678e+08	3.18801e+07	7.59147e+07	1.3106e+08	4.39261e+07	9.02199e+07	7.58995e+07	1.94829e+08	4.79591e+07	6.82936e+07	4.09658e+07	5.51176e+07	7.91506e+07	1.60981e+08	8.42167e+07	4.59479e+08	7.23682e+08
	High	[K].SKPTVSSSMEFK.[Y]	1xOxidation [M9]	1	638	P04114	P04114 [3450-3461]		0	1343.65	18	0.960552	0.795793	0.593111	1.03459e+08	9.16469e+07	2.13024e+08	6.57299e+07	1.26265e+08	3.50353e+07	6.67932e+07	2.827e+07	2.9179e+07	3.61961e+07	4.42326e+07	5.67928e+07	5.57567e+07	1.61931e+08	8.48415e+07	8.8666e+07	4.96778e+07	4.15868e+07	1.32545e+08	2.31604e+07	6.16606e+07	6.58928e+07	2.96487e+07	5.50369e+07	8.95582e+07	1.65906e+08	9.3903e+07	8.27878e+07	6.42028e+07	6.62457e+07	1.05346e+08	1.56168e+08	8.16952e+07	5.09502e+08	2.65498e+08
	High	[K].FRETLEDTRDR.[M]		1	127	P04114	P04114 [2512-2522]		2	1437.71	10	0.849174	0.88404	0.653406	5.51686e+07	4.71245e+07	5.68027e+07	3.16675e+07	1.33659e+08	3.40439e+07	2.82816e+07	2.38376e+07	1.76726e+07	1.68269e+07	2.21236e+07	1.49461e+07	1.42896e+08	8.09317e+08	2.28849e+08	1.66862e+07	2.99307e+07	2.48662e+07	1.04479e+07	9.21124e+06	1.90019e+07	2.14653e+07	1.1467e+07	3.56991e+07	4.10586e+07	7.51215e+07	4.51051e+07	2.03995e+07	4.31821e+07	2.62941e+07	2.96217e+07	6.72447e+07	5.351e+07	9.07238e+08	3.05297e+08
	High	[R].ETLEDTRDR.[M]		1	98	P04114	P04114 [2514-2522]		1	1134.54	3	0.942852	0.210361	0.760606	622546		5.14391e+06				6.55352e+06	5.37799e+06	1.29862e+06		614630	396843	1.4433e+06	7.95507e+06	1.50068e+06	4.9317e+06		3.12723e+06	947010	4.50507e+06	1.66629e+06	6.82137e+06	4.70073e+06	208539	540368	637322		3.50127e+06			4.85535e+06		3.60683e+06	1.11618e+07
	High	[K].LSNVLQQVK.[I]		1	366	P04114	P04114 [2377-2385]		0	1028.61	13	0.857027	0.797342	0.0543496	4.32276e+08	4.09761e+08	4.90243e+08	2.73114e+08	6.8871e+08	1.87425e+08	1.9867e+08	2.72395e+08	2.00781e+08	2.23847e+08	2.51059e+08	1.99491e+08	6.47149e+08	1.71159e+09	1.06405e+09	2.58366e+08	5.12912e+08	3.98245e+07	1.89847e+08	6.34595e+07	3.20471e+08	3.2967e+08	2.27654e+06	3.71314e+08	4.0878e+08	6.95358e+08	2.62796e+08	3.25277e+08	4.19741e+08	2.74849e+08	3.41381e+08	6.06013e+08	3.28633e+08	3.53944e+08	1.46434e+09
	High	[R].TGISPLALIK.[G]		1	200	P04114	P04114 [220-229]		0	1012.64	1	7.5341e-07	0.0543064	0.0120526	1.54015e+07	1.38262e+07	2.65354e+07	1.71166e+07	5.66634e+06	1.99321e+06	4.56698e+06	2.58483e+06	2.32025e+06	2.28445e+06	3.51259e+06	1.69429e+07	2.55344e+07	8.3897e+07	5.85954e+07	1.85483e+07	2.24e+07	1.622e+07	5.13989e+07	7.44123e+07	1.58118e+07	6.24803e+07	9.44462e+07	2.20047e+07	8.7046e+06	4.80665e+07	1.43504e+07	1.18152e+07	1.16431e+07	2.00586e+07	1.7042e+07	1.31713e+07	4.09372e+06	4.36833e+07	3.46604e+08
	High	[K].YEGLQEWEGK.[A]		1	196	P04114	P04114 [3964-3973]		0	1238.57	5	0.3479	0.902225	0.91975	1.69852e+07	2.77664e+07	7.35626e+07	2.97229e+07	3.51409e+07	1.10915e+07	9.59438e+06	1.35754e+07	2.97817e+06	7.17024e+06	5.48269e+06	6.57301e+06	3.67254e+07	1.03263e+08	1.01939e+08	1.2573e+07	3.80674e+07	7.78143e+06	1.79978e+07	3.80032e+06	2.55881e+07	2.92039e+07	4.78342e+06	1.76722e+07	1.41018e+07	4.78464e+07	3.56917e+06	1.37778e+07	1.20659e+07	2.03634e+07	1.69323e+07	4.06108e+07	2.87606e+07	1.93627e+08	1.68184e+08
	High	[R].IYSLWEHSTK.[N]		1	90	P04114	P04114 [3559-3568]		0	1263.64	5	0.942852	0.964002	0.893308	7.58805e+06	8.00248e+06	1.70814e+07	7.17178e+06	2.26957e+07	5.8541e+06	6.34419e+06	4.34387e+06	1.73741e+06	2.04649e+06	1.71923e+06	2.67722e+06	3.40484e+07	1.51717e+08	6.36854e+07	4.23665e+06	4.91575e+06	3.30444e+06	8.56598e+06	3.5964e+06	6.92355e+06	1.01736e+07	6.32317e+06	8.4532e+06	7.97211e+06	2.51745e+07	3.04211e+06	4.25893e+06	3.51072e+06	5.69983e+06	1.00305e+07	1.93676e+07	7.77044e+06	2.35852e+08	6.96712e+07
	High	[K].RVAWHYDEEK.[I]		1	32	P04114	P04114 [1164-1173]		1	1332.63	4	0.815459	0.98179	0.995668	1.25377e+07	2.73627e+06	4.30613e+06	2.54826e+06	2.9091e+06	1.03346e+06	2.09209e+06	1.79814e+06	1.57078e+06	553827	1.58007e+06	597036	1.44897e+06	2.17686e+07	5.01223e+06	580337	802029	1.26016e+06	363101	1.20164e+06	811022	1.56388e+06	1.23218e+06	1.02559e+06	910338	2.91367e+06	3.46569e+07	710352	3.29178e+06	1.98507e+06	2.60571e+06		1.2725e+06	1.25568e+07	4.63432e+06
	High	[K].IDDIWNLEVK.[E]		1	162	P04114	P04114 [3538-3547]		0	1244.65	22	0.766674	0.939325	0.979732	9.07201e+06	1.77902e+07	7.70807e+07	2.35447e+07	5.04499e+07	6.01705e+06	4.78037e+06	7.84392e+06	5.54614e+06	3.6465e+06	2.36911e+06	1.18263e+07	5.38897e+07	3.49914e+08	1.12541e+08	1.06605e+07	1.50616e+07	2.16612e+06	6.26654e+06	7.34205e+06	3.55791e+06	1.01707e+07	7.49339e+06	5.06645e+06	5.63719e+06	2.36642e+07	2.06336e+06	5.14901e+06	9.19791e+06	7.77756e+06	6.95495e+06	3.59399e+06	7.65312e+06	3.06695e+08	1.73524e+07
	High	[R].LLDHRVPQTDMTFR.[H]	1xOxidation [M11]	1	58	P04114	P04114 [1211-1224]		1	1744.88	2	0.867562	6.36817e-09	0.987881		694394	331073	1.99987e+06	540080		148923						5.93685e+06	7.12521e+07	1.81778e+07	164451		101261		48745.3	888966	1.46611e+06	32884.2				1.46314e+07					364692		2.04205e+07	1.54604e+07
	High	[K].VLVDHFGYTK.[D]		1	185	P04114	P04114 [733-742]		0	1178.62	16	0.959895	0.983174	0.891682	5.62673e+06	6.74178e+06	1.16681e+07	7.97014e+06	1.65936e+07	1.27039e+07	1.46091e+07	1.23722e+07	3.27129e+06	3.16239e+06	2.70391e+06	5.79149e+06	6.61871e+06	1.49121e+07	1.75041e+07	3.37288e+06	1.5566e+07	6.21914e+06	5.71138e+06	7.24322e+06	8.26257e+06	1.18337e+07	1.14729e+07	9.33348e+06	4.65472e+06	1.35751e+07	3.87515e+06	4.09053e+06	7.34066e+06	8.85809e+06	1.0907e+07	2.75362e+07	1.07877e+07	1.00576e+07	1.89669e+08
	High	[K].VQGVEFSHR.[L]		1	396	P04114	P04114 [1859-1867]		0	1058.54	19	0.655093	0.577394	0.373978	7.65807e+07	8.28332e+07	3.20146e+08	3.80412e+07	2.14948e+08	2.82046e+07	7.65063e+07	5.39366e+07	2.69664e+07	2.69613e+07	4.19998e+07	5.69214e+07	1.81527e+08	5.88593e+08	4.25435e+08	7.27233e+07	6.57759e+07	4.00944e+07	9.40896e+07	2.74878e+07	5.6004e+07	8.88391e+07	2.67635e+07	7.26395e+07	9.70281e+07	2.52893e+08	1.69525e+08	7.48559e+07	5.58648e+07	6.10988e+07	1.05315e+08	2.37008e+08	7.38723e+07	1.2803e+08	5.50637e+08
	High	[K].SISAALEHK.[V]		1	404	P04114	P04114 [1959-1967]		0	955.521	19	0.618795	0.432259	0.448556	7.36417e+08	4.41951e+08	6.95006e+08	4.38464e+08	1.08866e+09	3.72193e+08	2.09265e+08	1.53352e+08	1.14666e+08	1.2852e+08	1.6851e+08	1.71871e+08	2.82076e+08	1.27069e+09	4.20741e+08	1.29387e+08	1.84885e+08	2.06576e+08	1.21977e+08	1.6969e+08	1.98569e+08	2.59376e+08	1.37032e+08	1.82743e+08	2.10784e+08	3.32504e+08	1.5759e+08	1.43931e+08	2.16451e+08	1.72233e+08	1.9798e+08	2.08379e+08	1.97098e+08	1.51801e+08	5.28279e+08
	High	[R].MYQMDIQQELQR.[Y]	1xOxidation [M1]	1	13	P04114	P04114 [2523-2534]		0	1598.73	0	0.362792	4.58126e-17	0.509287			328134										414775	1.45691e+06	1.21046e+06																	177504			1.10116e+06
	High	[R].SATRINCK.[V]	1xCarbamidomethyl [C7]	1	11	P04114	P04114 [72-79]		1	949.488	0	4.74369e-17		3.66332e-17												62197																					398842	5.43518e+06
	High	[K].SKPTVSSSMEFK.[Y]		1	344	P04114	P04114 [3450-3461]		0	1327.66	17	0.953243	0.985735	0.303514	6.17168e+07	7.77341e+07	1.7907e+08	7.61057e+07	1.47633e+08	3.30415e+07	5.76451e+07	5.23348e+07	1.7478e+07	2.26445e+07	2.56911e+07	2.74632e+07	2.06013e+08	7.98145e+08	4.90714e+08	4.08828e+07	4.44035e+07	2.66616e+07	6.02307e+07	5.21809e+06	4.54765e+07	1.59945e+07	9.39402e+06	7.90862e+07	7.42241e+07	1.65563e+08	3.36884e+07	5.15418e+07	3.6672e+07	2.91913e+07	6.40346e+07	6.2275e+07	3.13978e+07	7.27206e+08	2.70729e+08
	High	[K].QHIEAIDVR.[V]		1	110	P04114	P04114 [2287-2295]		0	1080.58	5	1.99938e-14	0.00038159	0.974239	7.43583e+07	1.08055e+08	1.27003e+08	9.63611e+07	4.39176e+07	1.93916e+08	7.63778e+07	3.71989e+07	3.07188e+07	3.15664e+07	1.55916e+07	1.27049e+06	4.11981e+07	1.67854e+08	6.62934e+07	1.2781e+06	893421	2.01387e+06	922868	751532	3.33105e+06	2.87133e+06	1.68237e+06	1.16418e+07	1.62167e+07	4.43603e+07	1.34034e+07	1.23772e+07	7.21318e+06	5.28639e+06	1.22184e+07	3.10814e+07	1.00122e+07	2.34786e+08	1.18703e+08
	High	[K].TEVIPPLIENR.[Q]		1	502	P04114	P04114 [950-960]		0	1280.72	20	0.118527	0.968103	0.645872	2.90286e+07	6.96794e+07	2.22561e+08	6.53816e+07	1.26315e+08	2.70733e+07	3.43093e+07	4.0902e+07	2.01161e+07	2.57853e+07	1.27014e+07	4.71015e+07	1.95024e+08	6.0659e+08	4.00125e+08	6.95453e+07	1.01402e+08	2.62466e+07	1.22125e+08	4.23307e+07	6.40664e+07	7.4054e+07	4.08296e+07	3.57836e+07	3.01217e+07	1.52434e+08	2.0671e+07	6.49736e+07	2.04852e+07	3.56773e+07	6.45765e+07	1.25586e+08	4.76844e+07	1.42452e+08	7.39631e+08
	High	[K].PTVSSSMEFK.[Y]		1	72	P04114	P04114 [3452-3461]		0	1112.53	5	0.893924	0.676901	0.748064	5.08127e+06	4.80076e+06	1.60077e+07	7.00312e+06	8.12831e+06	3.27469e+06	2.79876e+06	2.2448e+06	747134	1.8639e+06	942808	948318	6.23426e+06	2.17481e+07	1.40977e+07	2.04892e+06	2.21557e+06	1.38053e+06	2.61988e+06	2.18227e+06	3.64464e+06	1.904e+06	2.12785e+06	2.46204e+06	1.30507e+06	7.48449e+06	808633	1.96612e+06	950751	1.44739e+06	2.61272e+06	5.66754e+06	3.75579e+06	1.58163e+07	1.8007e+07
	High	[K].SFDRHFEK.[N]		1	31	P04114	P04114 [3203-3210]		1	1065.51	4	0.987624	0.72769	0.943281	2.07924e+06	1.24658e+06	2.07108e+06	907427	1.41464e+07		2.28921e+06	1.41474e+06	830805	533393	1.72393e+06	3.68635e+06	3.43164e+06	4.06641e+07	5.72352e+06		1.03916e+06	782533			1.46265e+06	1.14752e+06	284571	1.56755e+06	2.7738e+06	2.87396e+06	3.79438e+07		3.78553e+06	1.82119e+06	2.07295e+06	1.74112e+06	906134	2.29948e+08	7.83281e+06
	High	[R].KYTYNYEAESSSGVPGTADSR.[S]		1	2	P04114	P04114 [51-71]		1	2282.02	0
	High	[R].VIGNMGQTMEQLTPELK.[S]		1	25	P04114	P04114 [491-507]		0	1888.95	0	0.00161471	0.00207029	0.00104969	1.17872e+06	1.91638e+06	1.25167e+07	1.95503e+06	8.46302e+06	564412														128612	42262.2	140249	87777.5				144197
	High	[K].GNVATEISTER.[D]		1	343	P04114	P04114 [197-207]		0	1176.59	6	0.398492	0.825771	0.999981	6.33757e+07	1.69749e+08	4.70986e+08	1.19477e+08	1.42887e+08	9.88462e+07	6.98539e+07	5.36752e+07	2.23961e+07	3.06592e+07	3.51776e+07	7.17532e+07	1.41369e+08	4.69192e+08	4.4382e+08	1.36857e+08	1.01776e+08	6.35741e+07	1.67645e+08	7.84172e+07	8.08099e+07	1.15617e+08	3.6909e+07	8.8102e+07	6.63749e+07	2.38075e+08	6.76685e+07	8.91931e+07	5.42248e+07	8.96432e+07	1.04672e+08	1.43174e+08	8.75754e+07	9.76641e+08	6.13131e+08
	High	[R].ESDEETQIK.[V]		1	184	P04114	P04114 [4047-4055]		0	1078.49	5	0.752554	0.640106	0.537171	2.78122e+06	3.98881e+06	1.93565e+07	3.23059e+06	9.18959e+06	597696	1.16774e+07	3.31677e+06	4.45536e+06	859933	2.28052e+06	1.21215e+06	1.69582e+06			4.87955e+06	994324	1.59804e+06	921664	1.74582e+06		4.85552e+06	1.13566e+06	1.19699e+06	2.45842e+06	321901	2.10104e+06	3.66205e+06	233842	1.3242e+06	2.79648e+06	2.60916e+06	3.07348e+06		724340
	High	[K].FRETLEDTR.[D]		1	79	P04114	P04114 [2512-2520]		1	1166.58	5	0.795886	0.46367	0.80489	3.42843e+06	4.31433e+06	8.61798e+06	3.04364e+06	1.17599e+07	3.17785e+06	5.3205e+06	4.54199e+06	1.81729e+06	5.15325e+06	3.24546e+06	5.1601e+06	1.69634e+07	8.51675e+07	5.04259e+07	3.6835e+06	6.16865e+06	4.08423e+06	8.97651e+06	1.40042e+06	2.40845e+06	5.98607e+06	364682	1.06169e+07	9.11949e+06	2.18213e+07	8.08096e+06	3.25362e+06	6.19676e+06	6.41752e+06	8.81791e+06	1.75744e+07	8.82016e+06	1.92437e+06	4.32022e+07
	High	[K].IEFEWNTGTNVDTKK.[M]		1	28	P04114	P04114 [1174-1188]		1	1781.87	1	0.947608	0.274368	0.556891	462482	1.57281e+06	4.5019e+06	1.04046e+06	8.7223e+06		60199.4	135843	70575.9		30725.2	396936	5.55251e+06	3.90796e+07	8.98182e+06	12431.5	339093	13198.9		5251.15				131859	609380	839917	62883.9	147339	46826.7	135009	299001	779630	345432	3.69559e+06	6.99588e+06
	High	[K].QAEAVLK.[T]		1	405	P04114	P04114 [321-327]		0	758.441	26	0.877122	0.967793	0.336762	1.99397e+07	7.03061e+07	6.89766e+07	2.26715e+07	3.55727e+07	9.40702e+07	4.95102e+07	3.39219e+07	2.16873e+07	3.87422e+07	4.56842e+07	4.26411e+07	7.0092e+07	6.9473e+07	2.42966e+07	2.72734e+07	3.93877e+07	3.03868e+07	3.10815e+07	4.73303e+07	7.04981e+07	6.79808e+07	3.46843e+07	3.2964e+07	6.49266e+07	4.41526e+07	2.61052e+07	4.49766e+07	5.21895e+07	3.762e+07	3.3825e+07	1.81855e+08	1.09861e+08	6.33767e+08	2.24507e+07
	High	[R].VTQEFHMK.[V]		1	206	P04114	P04114 [4178-4185]		0	1019.5	6	0.993016	0.991332	0.835225	2.36988e+07	2.40491e+07	1.05021e+08	1.18151e+07	9.08367e+07	1.3013e+08	2.41385e+07	2.47252e+07	1.13612e+07	1.28087e+07	1.55896e+07	1.04632e+07	4.25786e+07	3.19469e+08	1.62591e+08	1.79534e+07	1.87472e+07	1.08328e+07	1.87347e+07	5.61731e+06	2.34838e+07	3.00588e+07	3.67688e+06	2.00927e+07	2.12134e+07	1.04748e+08	1.38375e+07	2.11456e+07	1.66778e+07	5.7435e+07	3.70559e+07	5.16542e+07	2.93971e+07	2.14457e+07	3.4844e+08
	High	[R].VSTAFVYTK.[N]		1	330	P04114	P04114 [3704-3712]		0	1015.55	13	0.772521	0.859614	0.935976	1.00132e+08	7.29758e+07	6.69173e+07	2.42844e+07	7.97703e+07	5.12089e+07	6.37132e+07	5.16521e+07	2.53741e+07	3.40682e+07	1.93662e+07	2.36746e+07	1.23605e+08	2.57438e+08	1.59875e+08	1.23709e+07	6.19105e+07	1.60325e+07	4.0296e+07	2.35846e+07	4.66464e+07	2.35686e+07	1.85582e+07	8.034e+07	8.01591e+07	1.46887e+08	4.74868e+07	4.1262e+07	9.96026e+07	4.95093e+07	3.91799e+07	8.34946e+07	6.78611e+07	1.06795e+09	1.95247e+08
	High	[R].EFQVPTFTIPK.[L]		1	343	P04114	P04114 [1334-1344]		0	1306.7	20	0.223491	0.96535	0.337199	9.54562e+06	1.90907e+07	1.21481e+08	1.41874e+07	4.62211e+07	1.62941e+07	6.87777e+06	9.2621e+06	4.06472e+06	1.54713e+07	1.65707e+06	7.03017e+06	4.14499e+07	2.54035e+08	1.13922e+08	3.92054e+07	1.51399e+07	1.36117e+07	4.80484e+07	2.01759e+07	8.79685e+06	2.3383e+07	2.62432e+07	1.20785e+07	5.33326e+06	4.38366e+07	6.92923e+06	2.108e+07	2.63492e+06	1.1554e+07	1.43069e+07	2.43829e+07	1.02499e+07	1.79521e+08	2.41209e+08
	High	[K].GISTSAASPAVGTVGMDMDEDDDFSK.[W]		1	19	P04114	P04114 [3996-4021]		0	2603.11	0	0.389118	0.24137	0.289573	214089	309925	1.50736e+06	311402	4.68564e+06	288154	12730.2	9418.15	51608.5	50525.2	43614.2	19973.4		617270		11638.6		31266.9	36644.8	20977.7	29085.9	89005.7	45234	29567.6	14176.2	73914	54715.1	24647.9	24751.7	35477.3	33232.1	30296.5	48623.2		138201
	High	[K].YGMVAQVTQTLK.[L]		1	59	P04114	P04114 [276-287]		0	1338.71	2	0.946538	0.878602	0.639054	1.13529e+06	615698	6.11064e+06	2.56465e+07	8.47865e+06	1.52601e+07	540519	883804	145266	131023	32916.4	88759.2	4.26655e+06	1.35997e+07	3.02691e+06	73588.9	722284	148080	181447		872718	927805	60189.2	535638	220778	1.60743e+06	899422	102684	104998	1.09137e+06	665790	1.3137e+06	593727	4.47546e+07	5.98473e+06
	High	[K].NTFTLSYDGSLR.[H]		1	6	P04114	P04114 [1416-1427]		0	1373.67	1	0.00168498	0.119161	0.857586	4.13768e+06	5.59882e+06	64443	5.24417e+06	174571	1.33411e+07		1.45022e+06	951690	2.9405e+06	512774	108994	4.6752e+06	849464	3.8781e+06	33761.7	3.2664e+06	144924	64193.2	42809.5	72733.2	55499.2	43414.5	709589	38504.7	1.46813e+06	657342	9312.61	22569.9	576079	480736		1.07107e+06	1.10176e+07
	High	[K].GSVLSREYSGTIASEANTYLNSK.[S]		1	2	P04114	P04114 [3502-3524]		1	2447.2	0
	High	[K].NPNGYSFSIPVK.[V]		1	229	P04114	P04114 [3713-3724]		0	1322.67	9	0.00426934	0.906721	0.475775	7.77577e+06	2.06147e+07	5.68109e+07	1.61286e+07	7.26248e+07	1.09236e+07	1.03954e+07	7.80416e+06	1.72351e+06	4.08346e+06	6.05634e+06	1.48399e+07	1.71093e+08	4.68134e+08	3.51633e+08	3.36713e+07	3.61942e+07	4.50407e+06	3.5243e+07	2.55418e+07	1.74206e+07	4.94905e+07	2.52906e+07	1.13271e+07	1.5007e+07	3.7545e+07	4.7672e+06	1.26284e+07	6.15302e+06	1.11963e+07	2.52503e+07	3.76105e+07	2.38268e+07	8.25825e+08	3.00627e+08
	High	[K].LQSTTVMNPYMK.[L]		1	101	P04114	P04114 [4542-4553]		0	1412.69	1	0.639538	0.0901824	0.234904	3.07946e+06	4.85192e+06	8.49227e+06	3.66481e+06	6.00998e+06	1.5631e+06	303144	449811		42634.2	143243	71100.1	6.28039e+06	1.32079e+07	1.05392e+07	344842			973540		629507	996799	58624.3	654147	1.46998e+06	2.76136e+06	421018	418296	404482	199989	1.14971e+06	3.57108e+06	609833	3.2063e+07	1.799e+07
	High	[K].QSFDLSVK.[A]		1	60	P04114	P04114 [3167-3174]		0	923.483	3	0.645185	0.897374	0.943588	6.56141e+07	7.86596e+07	2.37079e+08	9.6529e+07	1.35027e+08	5.56764e+07	3.46015e+07	4.17536e+07	1.51437e+07	2.70053e+07	2.0513e+07	4.77039e+07	1.16019e+08	3.16524e+08	3.70421e+08	9.00402e+07	8.00557e+07	2.61413e+07	1.34432e+08	3.01405e+07	5.20049e+07	6.46514e+07	4.50359e+07	6.58178e+07	6.39993e+07	1.50916e+08	3.3047e+07	6.74301e+07	3.47194e+07	4.93694e+07	7.75145e+07	1.37523e+08	9.49636e+07	2.8501e+06	3.91228e+08
	High	[K].YNALDLTNNGK.[L]		1	269	P04114	P04114 [1803-1813]		0	1222.61	6	0.0109453	0.976073	0.878215	5.45372e+07	9.19636e+07	2.94288e+08	8.43976e+07	1.22672e+08	6.20919e+07	3.91337e+07	4.33661e+07	1.44585e+07	2.90167e+07	2.43587e+07	3.16725e+07	1.98777e+08	7.1418e+08	7.23163e+08	1.47066e+08	4.70708e+07	2.4063e+08	7.23112e+07	1.93083e+08	8.77462e+07	2.81378e+08	4.66322e+07	5.41674e+07	4.34746e+07	3.99198e+08	3.53187e+07	4.1597e+07	3.45554e+07	1.63479e+08	7.18983e+07	1.28838e+08	7.57615e+07	5.98366e+08	6.72036e+08
	High	[K].GTYGLSCQR.[D]	1xCarbamidomethyl [C7]	1	417	P04114	P04114 [1499-1507]		0	1041.48	9	0.896542	0.76916	0.835088	9.72751e+07	1.06122e+08	2.36489e+08	1.04683e+08	1.07756e+08	8.56902e+07	4.89334e+07	3.58805e+07	2.12132e+07	2.71531e+07	3.06807e+07	4.66202e+07	8.06121e+07	2.38644e+08	1.88294e+08	6.45649e+07	4.91065e+07	3.2937e+07	8.49233e+07	4.34959e+07	5.25245e+07	7.42357e+07	3.40806e+07	6.42591e+07	6.00358e+07	1.75648e+08	4.56303e+07	5.58773e+07	4.36606e+07	5.59476e+07	8.70344e+07	1.15048e+08	7.76878e+07	3.04836e+08	3.24093e+08
	High	[K].PSLMIQK.[A]		1	44	P04114	P04114 [519-525]		0	816.465	3	0.532534	0.891901	0.108886	4.38231e+07	1.05097e+08	4.43603e+08	1.4897e+08	3.74586e+08	7.85063e+07	6.29524e+07	7.4661e+07	1.53902e+07	2.34434e+07	2.45002e+07	2.9363e+07	4.84971e+08	1.38432e+09	1.10376e+09	1.01743e+08	1.08149e+08	3.38385e+07	1.59011e+08	1.54335e+07	1.26482e+08	9.46297e+07	5.4249e+07	9.34261e+07	7.22487e+07	4.45711e+08	4.60181e+07	3.43199e+07	2.77558e+07	3.1021e+07	8.90258e+07	2.20691e+08	1.21762e+08	9.62763e+06	1.34655e+09
	High	[K].WNFYYSPQSSPDKK.[L]		1	8	P04114	P04114 [4022-4035]		1	1746.81	0
	High	[K].LHVAGNLK.[G]		1	429	P04114	P04114 [1821-1828]		0	851.51	22	0.97522	0.790129	0.631334	1.75649e+08	1.30316e+08	2.17332e+08	5.14856e+07	4.44824e+08	1.31843e+08	2.79691e+08	1.68901e+08	9.22216e+07	1.40696e+08	1.03889e+08	7.26637e+07	7.50393e+08	2.80279e+09	1.18472e+09	1.08941e+08	1.42544e+08	1.09705e+08	8.16002e+07	5.71362e+07	7.70987e+07	1.14726e+08	6.40334e+07	1.43408e+08	2.01292e+08	4.34018e+08	2.24753e+08	1.58324e+08	1.77164e+08	1.37403e+08	1.93441e+08	3.96114e+08	1.81088e+08	2.07426e+09	1.00437e+09
	High	[K].LDNIYSSDK.[F]		1	946	P04114	P04114 [1770-1778]		0	1054.51	22	0.94496	0.999895	0.780012	1.99455e+08	1.5866e+08	9.32241e+08	1.90726e+08	3.31935e+08	2.0342e+08	1.16664e+08	8.77085e+07	5.80211e+07	7.43844e+07	5.41503e+07	1.32713e+08	2.79495e+08	9.10381e+08	6.05815e+08	1.74279e+08	1.48262e+08	8.53436e+07	2.36835e+08	1.04544e+08	1.28583e+08	1.47519e+08	8.90701e+07	1.4941e+08	1.543e+08	3.91312e+08	1.12968e+08	1.75934e+08	8.13478e+07	1.20868e+08	1.69049e+08	3.20254e+08	1.67849e+08	4.70835e+08	8.84395e+08
	High	[K].KLQSTTVMNPYMK.[L]	1xOxidation [M]	1	6	P04114	P04114 [4541-4553]		1	1556.78	0	4.74369e-17		3.66332e-17													850472	1.92047e+06	1.48564e+06																				1.53833e+06
	High	[K].NRNNALDFVTK.[S]		1	216	P04114	P04114 [3211-3221]		1	1291.68	16	0.983422	0.0666679	0.899137	2.11699e+07	2.20641e+07	1.85481e+07	2.10254e+07	1.97922e+08	1.72684e+07	5.19411e+07	6.65997e+07	1.95164e+07	2.9297e+07	1.28903e+07	5.87177e+06	1.77445e+08	5.27365e+08	2.95866e+08	7.20888e+06	1.86828e+07	1.17617e+07	1.60915e+07	7.81766e+06	2.71125e+07	1.39715e+07	5.40291e+07	7.08353e+07	7.9699e+07	1.00681e+08	6.97426e+07	1.9316e+07	4.66001e+07	5.50951e+07	5.09491e+07	1.19642e+08	7.03934e+07	2.28143e+07	5.69064e+08
	High	[K].LIVAMSSWLQK.[A]	1xOxidation [M5]	1	406	P04114	P04114 [1230-1240]		0	1291.71	9	0.991595	0.888829	0.723336	1.81414e+07	2.10928e+07	9.78029e+07	5.31241e+07	7.48371e+07	5.47494e+07	5.95811e+06	6.03047e+07	4.22689e+07	6.22892e+07	3.93206e+07	3.70596e+07	2.17771e+08	1.81922e+08	4.67076e+08	3.51721e+07	5.38448e+07	2.09551e+07	7.84514e+07	8.99824e+06	7.89208e+07	1.9388e+07	1.14956e+07	4.26719e+07	3.84753e+07	1.15561e+08	1.38272e+06	1.64301e+07	9.25874e+07	1.32938e+08	9.77578e+07	9.41002e+07	5.72663e+07	3.01962e+08	3.86414e+08
	High	[K].QGFFPDSVNK.[A]		1	268	P04114	P04114 [708-717]		0	1138.55	19	0.771824	0.994201	0.937306	5.91276e+07	1.26719e+08	3.75347e+08	1.05877e+08	1.48059e+08	4.40035e+07	5.68048e+07	3.76094e+07	1.30589e+07	2.17682e+07	1.34516e+07	3.76374e+07	3.13561e+08	1.27941e+09	4.39392e+08	7.59577e+07	8.53412e+07	2.15591e+07	2.01697e+08	2.04058e+07	4.79953e+07	5.69379e+07	4.5379e+07	7.64065e+07	9.97592e+07	2.59829e+08	3.7555e+07	3.84236e+07	2.34895e+07	4.04616e+07	7.66306e+07	1.36153e+08	9.2205e+07	8.40532e+08	5.55291e+08
	High	[K].NSEEFAAAMSR.[Y]	1xOxidation [M9]	1	767	P04114	P04114 [118-128]		0	1228.53	19	0.420019	0.532252	0.832403	6.33245e+07	5.59747e+07	1.85111e+08	5.73305e+07	5.56578e+07	5.29068e+07	7.38795e+07	4.28968e+07	3.5636e+07	4.4576e+07	3.48563e+07	9.04638e+07	8.94686e+07	1.54502e+08	2.19965e+08	1.18923e+08	6.26471e+07	3.72056e+07	1.50851e+08	8.07262e+07	7.70802e+07	7.69134e+07	4.2698e+07	6.26471e+07	7.22823e+07	2.10653e+08	8.70964e+07	9.50873e+07	6.33315e+07	1.00313e+08	1.14115e+08	1.38316e+08	9.00836e+07	4.28166e+08	3.40908e+08
	High	[K].QTEATMTFK.[Y]	1xOxidation [M6]	1	448	P04114	P04114 [1044-1052]		0	1072.5	16	0.119082	0.268885	0.371463	2.25605e+07	4.06245e+07	1.2095e+08	2.37894e+07	4.00887e+07	7.13258e+07	7.18216e+07	4.73847e+07	3.16946e+07	3.70273e+07	3.81186e+07	7.7242e+07	1.20046e+08	2.93939e+08	2.07083e+08	1.02468e+08	6.80899e+07	6.48501e+07	9.08446e+07	6.36536e+07	7.07286e+07	1.18235e+08	3.85389e+07	4.36223e+07	7.10807e+07	1.3286e+08	8.14741e+07	1.00839e+08	5.15733e+07	8.2386e+07	1.0863e+08	1.26142e+08	7.86715e+07	5.6604e+08	2.02456e+08
	High	[K].NSEEFAAAMSRYELK.[L]		1	3	P04114	P04114 [118-132]		1	1745.82	1	4.74369e-17	0.818619	0.285742			102812		804841		87056.6	78140.2																	184054	46177.2	214646					512716		3.24756e+06
	High	[K].LGNNPVSK.[G]		1	736	P04114	P04114 [1443-1450]		0	828.457	33	0.266108	0.162428	0.515335	7.35198e+07	8.98279e+07	2.15729e+08	5.80738e+07	5.78281e+07	5.86044e+07	5.29079e+08	2.93337e+08	1.87122e+08	1.59716e+08	2.32123e+08	2.9723e+07	1.31841e+08	1.335e+08	5.2978e+07	6.69041e+08	3.95674e+08	3.34339e+08	7.58478e+07	3.07432e+08	4.4116e+08	5.793e+08	2.51464e+08	3.60409e+08	4.12332e+08	4.54684e+07	4.55098e+08	3.78742e+08	2.94554e+08	3.28985e+08	6.25461e+08	6.86506e+08	5.16164e+08	2.87114e+09	6.13193e+07
	High	[K].GLLIFDASSSWGPQMSASVHLDSK.[K]	1xOxidation [M15]	1	4	P04114	P04114 [1451-1474]		0	2549.23	0		4.58126e-17	3.66332e-17																								4728.33		7918.57						5244.61	14527		2.22594e+06
	High	[K].LSNDMMGSYAEMK.[F]	1xOxidation [M]	1	275	P04114	P04114 [1738-1750]		0	1492.61	3	0.872329	0.825771	0.853548	5.52542e+06	1.42005e+07	3.59936e+07	1.32304e+07	1.81525e+07	9.50151e+06	3.99906e+06	4.80594e+06	694750	1.30667e+06	2.31805e+06	1.75898e+06	2.93665e+07	9.48298e+07	6.40692e+07	6.03378e+06	6.82591e+06	2.07812e+06	1.23163e+07	1.83282e+06	6.57174e+06	1.171e+07	4.60763e+06	7.36046e+06	6.6466e+06	2.84662e+07	1.38455e+06	3.05997e+06	2.1169e+06	2.3997e+06	4.68915e+06	2.33986e+07	7.9991e+06	6.31893e+07	1.06851e+08
	High	[K].GMALFGEGK.[A]	1xOxidation [M2]	1	533	P04114	P04114 [3006-3014]		0	925.445	35	0.356114	0.823921	0.274188	5.94707e+07	7.204e+07	1.6827e+08	8.6278e+07	1.11499e+08	4.22065e+07	3.43154e+07	3.84592e+07	1.8019e+07	2.35495e+07	2.29313e+07	6.38975e+07	1.41519e+08	3.73699e+08	2.82517e+08	6.62176e+07	6.36919e+07	3.5499e+07	9.07934e+07	5.44984e+07	7.66557e+07	6.94577e+07	3.92951e+07	5.86004e+07	5.91945e+07	1.17333e+08	5.25813e+07	5.43168e+07	3.49459e+07	3.50848e+07	5.34722e+07	1.15531e+08	7.69241e+07	9.43162e+07	3.47567e+08
	High	[K].ESQLPTVMDFRK.[F]		1	30	P04114	P04114 [621-632]		1	1450.74	2	0.341328	0.193307	0.655277	2.44828e+06	4.14376e+06	6.39344e+06	2.78679e+06	1.31964e+07	857748	230571	380738	80224.9	94475.4	34115.6	16880.3	1.05091e+07	4.0596e+07	3.08081e+07	96378.1	200035		224092		481177	277248	93764.6	91443.5	1.30865e+06	1.83668e+06	2.21295e+06	93399	208882	48588.8	257101	2.47641e+06	1.35807e+06	6.53286e+07	3.20142e+07
	High	[R].ATLYALSHAVNNYHK.[T]		1	24	P04114	P04114 [440-454]		0	1701.87	1	0.0346698	0.407043	0.521673	2.75722e+06	1.04074e+06	591412	1.81433e+06	3.54058e+06	223399	1.2401e+06	1.81653e+06					1.30278e+07	9.67049e+06	1.75917e+07		127104	1.7353e+06	3.50723e+06		6.70401e+06	357191	6.6591e+06		1.30153e+06	507533	2.6732e+06	27063.9		295194		1.41164e+07	1.02153e+07	2.03112e+06	8.09408e+07
	High	[K].MGLAFESTK.[S]	1xOxidation [M1]	1	619	P04114	P04114 [306-314]		0	999.482	32	0.942852	0.907126	0.927448	1.29054e+08	1.44312e+08	2.60604e+08	1.321e+08	7.46866e+07	1.09306e+08	5.49268e+07	7.93285e+07	2.48534e+07	9.97695e+07	2.42489e+07	7.2886e+07	1.01929e+08	1.89206e+08	3.75053e+08	1.16063e+08	8.55893e+07	4.66171e+07	1.3671e+08	5.01143e+07	1.35269e+08	7.7368e+07	4.42777e+07	5.12033e+07	7.60478e+07	1.4652e+08	4.46445e+07	8.15335e+07	7.46714e+07	1.1125e+08	9.99331e+07	1.0249e+08	7.80523e+07	2.48781e+08	4.95149e+08
	High	[K].NMEVSVATTTK.[A]	1xOxidation [M2]	1	868	P04114	P04114 [3420-3430]		0	1196.58	32	0.678735	0.917234	0.617591	1.24792e+08	1.08879e+08	3.31888e+08	1.01465e+08	1.27842e+08	1.17307e+08	1.03861e+08	7.92355e+07	6.14201e+07	8.99624e+07	6.59537e+07	9.28374e+07	1.19093e+08	1.96833e+08	2.18993e+08	1.47751e+08	1.28029e+08	1.02996e+08	1.61935e+08	1.24464e+08	1.33758e+08	1.86802e+08	9.02993e+07	1.10249e+08	1.16811e+08	1.7499e+08	1.10433e+08	1.36595e+08	1.18558e+08	1.14956e+08	1.65195e+08	2.1553e+08	1.20534e+08	4.35232e+08	2.90265e+08
	High	[K].FVTQAEGAK.[Q]		1	773	P04114	P04114 [1035-1043]		0	950.494	27	0.24098	0.64155	0.706637	1.54913e+08	4.02617e+08	2.00759e+09	1.99988e+08	1.32519e+08	4.1387e+08	3.22401e+08	2.61389e+08	1.31893e+08	1.56017e+08	1.51724e+08	3.34113e+08	7.66444e+08	2.51763e+09	1.71608e+09	4.65527e+08	2.88692e+08	2.21493e+08	6.53919e+08	2.74348e+08	3.39997e+08	3.75336e+08	1.86471e+08	2.48979e+08	3.07343e+08	7.18233e+08	2.88634e+08	3.25508e+08	2.17448e+08	2.92929e+08	4.23879e+08	6.04281e+08	3.60894e+08	3.90763e+09	1.63743e+09
	High	[R].EEYFDPSIVGWTVK.[Y]		1	24	P04114	P04114 [4386-4399]		0	1669.81	1	0.65063	0.63189	0.958204	45279.3	11214.4	106838	22600.1	103414		9854.77	40600.1	26550.4	6722.06	9842.34		143793	827652	108695					286963		15902.6	24582.5	169575	160323	105289	44025.9	60453.2	17993.8	104999	33100.6	85743.9	65341.3	1.25066e+06	201100
	High	[K].NMEVSVATTTK.[A]		1	251	P04114	P04114 [3420-3430]		0	1180.59	7	0.806883	0.922557	0.580361	5.76256e+07	1.15468e+08	1.74162e+08	1.01415e+08	8.88727e+07	5.46828e+07	5.46906e+07	5.71987e+07	2.86663e+07	4.51787e+07	3.04287e+07	3.68579e+07	9.2022e+07	7.26432e+07	3.89618e+07	6.42505e+07	8.04012e+07	2.98544e+07	8.78349e+07	2.73654e+07	6.38234e+07	6.54776e+07	2.70008e+07	5.54903e+07	1.19402e+08	1.51498e+07	4.30203e+07	8.0408e+07	4.97242e+07	2.175e+07	4.07631e+07	1.3333e+08	2.09668e+07	1.5701e+08	3.77764e+08
	High	[K].EVYGFNPEGK.[A]		1	371	P04114	P04114 [101-110]		0	1139.54	24	0.557379	0.785448	0.852251	5.82981e+07	1.37653e+08	3.77857e+08	1.32519e+08	2.22798e+08	9.45776e+07	7.0291e+07	6.10105e+07	2.7524e+07	4.04164e+07	2.34686e+07	4.3712e+07	2.99318e+08	7.24619e+08	5.64454e+08	1.00907e+08	8.51824e+07	4.15098e+07	1.3628e+08	6.27228e+07	9.31037e+07	1.32513e+08	7.61265e+07	9.14035e+07	9.4738e+07	2.53957e+08	6.63995e+07	7.15203e+07	5.36843e+07	9.46079e+07	1.15088e+08	2.05723e+08	1.09904e+08	1.22547e+09	6.78348e+08
	High	[K].LVGFIDDAVK.[K]		1	289	P04114	P04114 [2393-2402]		0	1076.6	14	0.758854	0.624657	0.195596	1.0593e+07	1.24302e+07	9.08986e+07	1.16551e+07	3.54795e+07	1.10852e+07	2.62643e+07	1.12117e+07	2.63753e+06	7.9139e+06	6.36838e+06	7.35251e+06	9.14737e+06	9.06576e+07	4.45324e+07	1.88861e+07	2.06807e+07	2.55184e+06	2.22637e+07	3.54723e+06	8.37185e+06	2.05183e+07	4.19939e+06	2.10217e+07	6.23891e+06	5.38344e+07	4.87127e+06	3.01162e+06	1.43314e+07	2.46838e+07	2.64503e+07	1.23734e+07	1.79441e+07	8.65394e+06	2.57048e+08
	High	[K].ESQLPTVMDFRK.[F]	1xOxidation [M8]	1	180	P04114	P04114 [621-632]		1	1466.73	26	0.97518	0.142411	0.237856	7.56744e+06	2.19956e+07	5.76069e+07	1.40592e+07	3.33519e+07	420094	2.92972e+07	2.63033e+07	5.46215e+06	1.07482e+07	8.99434e+06	6.93669e+06	7.97866e+07	2.47917e+08	2.07877e+08	1.6105e+07	1.09884e+07	5.59783e+06	1.26704e+07	3.51957e+06	9.71753e+07	6.74574e+06	1.8695e+06	3.69823e+07	3.359e+07	9.82174e+07	3.75855e+07	2.43383e+07	2.27758e+07	2.87306e+07	4.81868e+07	6.70982e+07	4.26106e+07	2.08375e+08	2.78737e+08
	High	[K].AHLDIAGSLEGHLR.[F]		1	2	P04114	P04114 [3657-3670]		0	1488.79	1	0.331035	0.795793	0.783557	793083	658119	968207	856332	2.10518e+06	840226	443782		385366	378162	299447			2.48425e+06										412135	442700	961989	389231	336100	536002		407578	404676	527107		1.26919e+06
	High	[K].YENYELTLK.[S]		1	211	P04114	P04114 [1563-1571]		0	1172.58	7	0.937193	0.992099	0.843602	2.89013e+07	9.19828e+07	2.2251e+08	9.41552e+07	1.20569e+08	5.70018e+07	4.48455e+07	5.31858e+07	2.24467e+07	2.33807e+07	3.06136e+07	3.88687e+07	1.35064e+08	4.44006e+08	3.29138e+08	5.05384e+07	3.04706e+07	8.93314e+06	8.24134e+07	2.85766e+07	5.0503e+07	7.9211e+07	3.34044e+07	5.01274e+07	4.83782e+07	2.01953e+08	4.04165e+07	5.63184e+07	2.25845e+07	5.46148e+07	9.06427e+07	1.27825e+08	8.80364e+07	5.37209e+07	3.81716e+08
	High	[K].FPEVDVLTK.[Y]		1	165	P04114	P04114 [3791-3799]		0	1047.57	3	0.0163214	0.501145	0.227594	1.46508e+07	3.50349e+07	2.27117e+08	4.61032e+07	1.71752e+08	3.02424e+07	1.28499e+07	1.82593e+07	5.51112e+06	1.06652e+07	6.47941e+06	1.14083e+07	1.33831e+08	5.64609e+08	2.33102e+08	5.58182e+07	4.71207e+07	6.09143e+06	5.76615e+07	1.74295e+07	6.91176e+07	8.02713e+07	1.96674e+07	3.22294e+07	5.31362e+07	1.20084e+08	1.78907e+07	3.17626e+07	9.7735e+06	2.43901e+07	3.86592e+07	1.03393e+08	1.94666e+07	6.39496e+08	5.32885e+08
	High	[K].PSLMIQK.[A]	1xOxidation [M4]	1	172	P04114	P04114 [519-525]		0	832.46	14	0.758608	0.342206	0.15276	1.85674e+09	1.9856e+09	2.34572e+09	1.83825e+09	4.2182e+09	1.36903e+09	7.92818e+08	7.20451e+08	4.14001e+08	5.52041e+08	5.07139e+08	5.05799e+08	1.62067e+09	5.0733e+09	2.4947e+09	4.33704e+08	1.0647e+09	7.77169e+08	5.02289e+08	4.99712e+08	8.05487e+08	1.11122e+09	7.62557e+08	9.4521e+08	1.02107e+09	1.66445e+09	8.67013e+07	5.72147e+08	6.39698e+08	6.61164e+08	5.38371e+08	8.23259e+08	1.04572e+09	2.74304e+07	2.38177e+09
	High	[K].ENLCLNLHK.[F]	1xCarbamidomethyl [C4]	1	62	P04114	P04114 [4350-4358]		0	1140.58	3	0.811705	0.692292	0.747596	3.74189e+07	2.41642e+07	3.36412e+06	2.29489e+07	8.26181e+07	1.98982e+07	8.98886e+06	1.89724e+07	1.71357e+07	1.69091e+07	2.25614e+07	1.37237e+07	4.66675e+07	4.32378e+07	5.79144e+07	1.32346e+07	2.95746e+07	7.61813e+06	1.3847e+07		2.11939e+07	3.89696e+07	1.21279e+07	4.13234e+07	2.82288e+07	3.80755e+07	2.90273e+07	2.90265e+07	4.01313e+07	1.55657e+07	2.67509e+07	2.20365e+07	2.86319e+07	9.0405e+06	5.39831e+07
	High	[R].FFGEGTK.[K]		1	336	P04114	P04114 [298-304]		0	785.383	18	0.778348	0.999895	0.785848	1.73068e+08	1.91439e+08	2.84346e+08	1.54741e+08	5.65481e+08	1.77512e+08	9.81277e+07	9.35548e+07	7.54994e+07	7.97709e+07	8.62941e+07	1.86783e+08	3.38981e+08	9.08784e+08	4.50808e+08	1.07782e+08	1.64476e+08	1.41817e+08	1.02661e+08	1.66973e+08	2.39924e+08	2.11701e+08	1.6947e+08	1.32516e+08	1.746e+08	2.19894e+08	1.58158e+08	1.03011e+08	1.52196e+08	1.40403e+08	1.08067e+08	1.71295e+08	1.63733e+08	7.53781e+07	3.52581e+08
	High	[R].IPSVQINFK.[D]		1	211	P04114	P04114 [2626-2634]		0	1045.6	5	0.896894	0.74967	0.958204	1.63148e+07	4.1254e+07	2.24512e+08	6.11113e+07	1.1053e+08	2.83367e+07	1.30117e+07	4.73919e+07	6.7791e+06	1.19609e+07	1.05302e+07	1.49564e+07	2.32954e+08	9.32921e+08	9.65251e+07	3.17744e+07	2.08213e+07	9.00995e+06	1.89899e+07	2.03998e+07	5.91052e+07	5.30604e+07	2.56935e+07	2.72966e+07	1.47967e+07	3.52546e+07	118501	2.14906e+07	9.27792e+06	1.36962e+07	2.39303e+07	6.26963e+07	6.60724e+07	1.01212e+09	7.46908e+08
	High	[K].DEPTYILNIK.[R]		1	161	P04114	P04114 [148-157]		0	1205.64	2	0.958894	0.866589	0.993828	2.52162e+07	3.45257e+07	2.00836e+08	4.31035e+07	1.15429e+08	5.87064e+07	4.82566e+07	2.88285e+07	3.51696e+06	2.88443e+06	7.10374e+06	1.42318e+07	1.36987e+08	5.62019e+08	3.6923e+08	2.25144e+07	3.6443e+07	2.88108e+07	9.65146e+07	2.53457e+07	3.82211e+07	2.49774e+07	2.80624e+07	5.42206e+07	2.75967e+07	7.46837e+07	2.50974e+07	2.72747e+07	2.06218e+07	2.17075e+07	2.37546e+07	6.19168e+07	1.91012e+07	5.35793e+08	4.72743e+08
	High	[K].IEIPLPFGGK.[S]		1	403	P04114	P04114 [1296-1305]		0	1070.62	3	0.349445	0.639223	0.361453	1.44803e+07	1.81322e+07	8.05086e+07	2.38737e+07	2.62278e+07	9.10015e+06	1.89032e+07	9.59479e+06	1.78844e+06	3.00131e+06	2.27446e+06	1.7147e+07	6.11539e+07	3.30267e+08	9.71466e+07	2.46696e+07	3.96424e+07	7.57971e+06	2.05983e+07	1.56528e+07	1.14292e+07	3.78162e+07	1.30862e+07	3.91179e+06	6.70072e+06	1.23754e+07	1.52713e+07	1.13062e+07	4.73181e+06	7.89998e+06	7.74746e+06	1.88819e+07	7.70931e+06	6.47455e+06	9.91989e+07
	High	[R].NNALDFVTK.[S]		1	63	P04114	P04114 [3213-3221]		0	1021.53	3	0.985029	0.841802	0.449673	1.4446e+07	2.58953e+07	6.71241e+07	2.42565e+07	2.90424e+07	7.89384e+06	1.57482e+07	1.36419e+07	4.53809e+06	6.90158e+06	4.29338e+06	3.66196e+06	5.82275e+07	2.50368e+08	8.80077e+07	1.01827e+07	1.38853e+07	1.38762e+06	1.13774e+07	1.61612e+06	1.71415e+07	1.04497e+07	977011	1.84406e+07	1.74793e+07	5.04029e+07	1.12745e+07	1.48063e+07	1.02632e+07	1.80073e+07	1.98437e+07	3.66646e+07	2.15445e+07	2.08186e+07	1.39977e+08
	High	[R].LTLDIQNKK.[I]		1	96	P04114	P04114 [1092-1100]		1	1072.64	8	0.797645	0.981304	0.866348	1.25713e+07	1.61591e+07	2.26493e+07	6.24548e+06	2.32802e+07	1.63726e+07	7.63521e+06	6.69308e+06	6.80167e+06	9.51993e+06	4.55712e+06	5.32551e+06	1.742e+07	6.10603e+07	2.56166e+07	1.34453e+07	9.8721e+06	6.50916e+06	1.33375e+07	5.75283e+06	1.10594e+07	1.15748e+07	5.83794e+06	1.01888e+07	9.06249e+06	1.62781e+07	9.78895e+06	1.09727e+07	9.41557e+06	3.82986e+06	9.46762e+06	1.22739e+07	9.89241e+06	9.02115e+07	4.18471e+07
	High	[K].DFSLWEK.[T]		1	40	P04114	P04114 [3149-3155]		0	924.446	1	4.22736e-08	0.941572	0.00556991	164490	335914	996423	429952	737600	86773.7	78197.3	224498	70623.7	172495	57227.3	1.90282e+06	9.57424e+07	2.10647e+08	1.6274e+08	9.75421e+06	3.99425e+06	2.55118e+06	9.87475e+06	2.4072e+06	6.02452e+06	1.05927e+07	4.3751e+06	565957	188167	1.29931e+06	20039	193285	182091	239235	980250	5.58828e+07	6.97551e+06	2.10336e+06	2.11292e+08
	High	[K].DNVFDGLVR.[V]		1	126	P04114	P04114 [4169-4177]		0	1034.53	7	0.886417	0.454079	0.187048	4.34229e+06	7.14831e+06	2.54292e+07	1.30793e+07	4.75588e+07	5.09836e+06	3.69962e+06	1.27476e+07	5.26695e+06	1.18896e+07	4.03837e+06	3.97583e+06	1.58099e+08	3.17971e+08	2.74155e+08	4.15312e+06	1.02685e+07	987632	8.05735e+06	3.75144e+06	5.55887e+06	1.06112e+07	8.09623e+06	3.25329e+07	1.36692e+07	4.31649e+07	8.3116e+06	9.38361e+06	9.1245e+06	1.29676e+07	4.31594e+07	1.02433e+08	2.0131e+07	3.42561e+06	4.26004e+07
	High	[K].LAPGELTIIL.[-]		1	18	P04114	P04114 [4554-4563]		0	1039.64	0	0.412484	0.776269	0.927533	1.01824e+07	1.44221e+07	2.58523e+07	5.45612e+06	2.17725e+06	2.15474e+06	8.59622e+06	3.30488e+06	2.46112e+06	2.9204e+06	1.97291e+06	4.3293e+06	7.10625e+06	1.71284e+07	1.58547e+07	5.99584e+06	7.43162e+06	6.50874e+06	2.29282e+07	6.43527e+06	6.04609e+06	3.46559e+06	3.05504e+06	1.97907e+06	2.03295e+06	3.94721e+06	674598	2.73084e+06	1.32856e+06	1.59567e+06	2.46449e+06	2.57536e+06	1.47192e+06	1.81894e+07	8.69511e+06
	High	[K].SLHMYANR.[L]		1	175	P04114	P04114 [1203-1210]		0	991.478	12	0.968214	0.300285	0.523249	8.97964e+06	1.01959e+07	1.43669e+07	1.09432e+07	7.7776e+07	4.2925e+06	2.44703e+07	2.04038e+07	2.92988e+06	5.61521e+06	9.35732e+06	3.51579e+06	1.15701e+08	6.43072e+08	2.40092e+08	8.11307e+06	8.37272e+06	2.26665e+06	3.90181e+06	1.98876e+06	7.82281e+06	8.22804e+06	1.0048e+06	2.55671e+07	2.50789e+07	5.39289e+07	2.7759e+07	1.09033e+07	1.25363e+07	7.96129e+06	1.76638e+07	5.2804e+07	1.60471e+07	1.68718e+08	3.41026e+08
	High	[K].ESQLPTVMDFR.[K]	1xOxidation [M8]	1	177	P04114	P04114 [621-631]		0	1338.64	15	0.999728	0.997728	0.785624	1.53589e+07	2.63822e+07	1.06074e+08	3.6043e+07	1.05338e+08	1.438e+07	5.48142e+06	1.27134e+07	4.51022e+06	6.68056e+06	3.6548e+06	4.86029e+06	8.95714e+07	4.04399e+08	8.82208e+07	8.01049e+06	9.82396e+06	8.0711e+06	1.30092e+07	7.2876e+06	1.45601e+07	1.63422e+07	3.63426e+06	1.6382e+07	1.04169e+07	4.8229e+07	8.09106e+06	9.94936e+06	9.0727e+06	1.66571e+07	1.96804e+07	2.41593e+07	1.21515e+07	3.72993e+08	1.65561e+08
	High	[R].QIDDIDVR.[F]		1	371	P04114	P04114 [4122-4129]		0	973.495	12	0.820102	0.969264	0.973891	1.39937e+08	2.45347e+08	5.80258e+08	2.30321e+08	2.3715e+08	1.42913e+08	1.13234e+08	8.36647e+07	3.67519e+07	4.91771e+07	4.50956e+07	1.14578e+08	4.31027e+08	1.45497e+09	8.02862e+08	1.42085e+08	1.5723e+08	7.48875e+07	3.5772e+08	1.03387e+08	1.36514e+08	2.29928e+08	1.51027e+08	1.33052e+08	1.14568e+08	3.73304e+08	8.82241e+07	1.58849e+08	7.43405e+07	9.18257e+07	1.52345e+08	3.01228e+08	1.67291e+08	9.94698e+07	1.26145e+09
	High	[K].RHIQNIDIQHLAGK.[L]		1	1	P04114	P04114 [2271-2284]		1	1642.91	0
	High	[K].LSNDMMGSYAEMK.[F]		1	14	P04114	P04114 [1738-1750]		0	1476.62	0	4.74369e-17	0.087609	0.825156	2.2114e+06	4.42545e+06	1.34396e+07	3.74274e+06	1.19462e+07	2.38835e+06			122778																422209	1.50764e+06	2.32637e+06				71752.6	862924			8.65751e+06
	High	[R].VTQEFHMK.[V]	1xOxidation [M7]	1	225	P04114	P04114 [4178-4185]		0	1035.49	4	0.686384	0.80799	0.891148	1.13199e+07	5.1792e+07	1.79824e+08	2.60493e+07	2.43107e+07	1.2722e+07	5.52673e+07	3.74914e+07	2.00459e+07	1.98839e+07	3.07602e+07	5.64294e+06	8.73143e+06	6.26389e+07	3.42999e+07	8.38731e+07	3.13353e+07	2.76309e+07	4.15508e+07	1.61029e+07	4.86799e+07	7.28082e+07	2.34066e+07	2.0354e+07	3.36248e+07	1.81827e+07	2.45851e+07	4.35633e+07	3.41603e+07	3.93964e+07	7.59684e+07	5.50412e+07	5.04241e+07	1.09426e+08	4.35259e+07
	High	[R].VPQTDMTFR.[H]		1	40	P04114	P04114 [1216-1224]		0	1094.53	0	0.994473	0.936248	0.954685	5.08157e+06	9.50343e+06	2.32394e+07	7.84088e+06	2.8877e+07	9.56013e+06	3.76339e+06	3.67906e+06	901518	1.36745e+06	2.31725e+06	735249	1.96184e+07	5.70876e+07	4.17902e+07	2.36351e+06	4.14618e+06	1.55387e+06	5.69152e+06	1.02705e+06	4.24818e+06	5.56309e+06	2.36874e+06	6.69985e+06	5.73468e+06	1.89131e+07	1.70561e+06	2.9906e+06	3.11049e+06	2.83381e+06	5.64541e+06	1.43578e+07	7.50362e+06	6.56368e+07	5.43631e+07
	High	[K].GAYQNNEIK.[H]		1	389	P04114	P04114 [1829-1837]		0	1036.51	5	0.835611	0.736294	0.651659	1.84868e+07			3.77026e+06	1.11317e+07		1.19082e+06	1.38241e+06	2.83469e+06	1.01372e+06	3.41754e+06	2.82413e+06	2.8303e+07	3.6312e+07	2.52356e+07	1.90996e+06	2.08347e+06		1.51616e+06	242776	9.09787e+06	4.29167e+06	8.5781e+07	5.75563e+06	1.33158e+07	6.67972e+06	2.33875e+06	3.76185e+06	7.80497e+06	2.27242e+06	4.13439e+06	5.34931e+06	4.8445e+06	9.83798e+07	8.98798e+06
	High	[K].SLHMYANR.[L]	1xOxidation [M4]	1	369	P04114	P04114 [1203-1210]		0	1007.47	14	0.559133	0.213333	0.255493	7.08349e+07	3.74719e+07	2.10472e+08	2.74335e+07	2.89645e+08	1.03649e+07	1.14457e+08	7.4304e+07	3.66367e+07	4.42481e+07	5.25058e+07	5.72605e+07	2.72468e+08	2.07651e+08	2.4324e+08	1.01006e+08	7.04375e+07	6.20975e+07	7.42065e+07	1.29715e+07	7.57775e+07	4.70555e+07	1.70136e+07	7.32266e+07	1.32351e+08	2.79495e+08	1.41378e+08	6.57504e+07	7.99003e+07	9.78798e+07	1.33498e+08	3.0627e+08	1.0649e+08	1.09461e+09	2.04514e+08
	High	[K].TFIEDVNK.[F]		1	233	P04114	P04114 [2411-2418]		0	965.494	6	0.16495	0.530509	0.890389	8.5772e+07	1.0348e+08	2.57839e+08	8.57014e+07	2.0104e+08	4.21062e+07	5.40979e+07	5.62543e+07	2.62602e+07	4.37895e+07	4.42443e+07	6.38631e+07	1.90746e+08	4.43762e+08	4.31961e+08	1.03336e+08	8.77788e+07	3.09711e+07	1.62123e+08	2.51545e+07	1.19054e+08	1.16855e+08	2.94476e+07	7.2619e+07	8.89804e+07	3.08853e+08	6.23893e+07	9.54468e+07	4.21313e+07	1.0834e+08	9.92876e+07	2.68934e+08	1.15419e+08	6.77259e+08	5.75363e+08
	High	[K].LTALTK.[K]		1	54	P04114	P04114 [2142-2147]		0	646.413	4	0.00863095	0.150907	0.0368157	1.14744e+07	3.55669e+07	1.23042e+08	1.4056e+07	1.87514e+07	4.5786e+07	5.13322e+07	3.63196e+07	1.91009e+07	2.2205e+07	3.24213e+07	5.63274e+07	2.03524e+08	3.4922e+08	2.02184e+08	1.18524e+08	7.31635e+07	5.37135e+07	1.53527e+08	9.04396e+07	7.20953e+07	1.92178e+08	3.37533e+07	7.52498e+07	7.71544e+07	2.38071e+08	7.14369e+07	6.93899e+07	4.7208e+07	9.26199e+07	9.73471e+07	1.43984e+06	187072	3.36857e+07	9.12932e+06
	High	[K].LQSTTVMNPYMK.[L]	1xOxidation [M]	1	100	P04114	P04114 [4542-4553]		0	1428.69	3	0.488141	0.93194	0.92686	1.1488e+07	1.27645e+07	3.71318e+07	5.2533e+06	2.63661e+07	6.59695e+06	5.80758e+06	6.39439e+06	1.89653e+06	2.61244e+06	3.96322e+06	3.21806e+06	3.08636e+07	8.59438e+07	5.28435e+07	1.0326e+07	1.05347e+07	3.82488e+06	1.14861e+07	2.10907e+06	1.62908e+07	1.23345e+07	3.23675e+06	8.50112e+06	1.27149e+07	3.66896e+07	6.0278e+06	5.95731e+06	5.38277e+06	4.9374e+06	1.35147e+07	3.47603e+07	1.18288e+07	6.90883e+07	1.02172e+08
	High	[R].EVTQRLNGEIQALELPQK.[A]		1	4	P04114	P04114 [2445-2462]		1	2066.12	0	0.00014343	0.564137	0.987881				109966	72773.5		20039.3	16855.1		4450.65			684681		999640									170673			32851.2							36605.7	784516
	High	[K].VEDIPLAR.[I]		1	482	P04114	P04114 [2698-2705]		0	912.515	11	0.52566	0.976299	0.990076	2.48947e+08	4.17511e+08	1.05448e+09	4.22864e+08	5.34556e+08	2.74193e+08	2.30761e+08	1.8995e+08	9.25099e+07	1.24786e+08	1.14248e+08	1.86628e+08	7.25403e+08	2.10042e+09	1.60677e+09	3.70335e+08	3.33594e+08	1.46506e+08	5.23948e+08	1.57855e+08	3.1706e+08	4.14259e+08	5.53828e+07	2.39857e+08	2.77041e+08	8.4134e+08	1.77059e+08	2.35302e+08	1.65179e+08	2.68065e+08	3.92586e+08	5.56606e+08	3.54997e+08	6.23978e+07	2.2767e+09
	High	[K].MGLAFESTK.[S]		1	68	P04114	P04114 [306-314]		0	983.487	2	0.590904	0.983627	0.569869	3.62654e+07	1.01913e+08	2.74965e+08	9.96496e+07	1.80572e+08	5.77493e+07	3.01036e+07	3.81256e+07	8.79432e+06	1.81394e+07	1.4976e+07	8.06039e+06	2.59545e+08	7.57926e+08	5.93926e+08	3.14289e+07	7.56828e+07	1.27707e+07	5.17676e+07	1.48437e+07	5.13358e+07	8.53816e+07	3.25981e+07	4.94671e+07	4.62425e+07	1.70195e+08	2.93647e+07	3.21852e+07	2.24576e+07	3.01241e+07	6.03274e+07	1.15863e+08	7.11648e+07	5.15543e+07	7.39981e+08
	High	[R].LTLDIQNK.[K]		1	101	P04114	P04114 [1092-1099]		0	944.541	4	0.816169	0.985164	0.860768	7.46269e+07	1.22235e+08	5.89933e+08	1.39805e+08	3.25717e+08	1.00333e+08	9.87147e+07	5.95847e+07	6.22561e+07	6.1823e+07	1.92894e+07	3.25701e+07	4.70745e+08	7.0092e+08	4.68634e+08	6.39413e+07	6.13441e+07	5.7777e+07	1.09936e+08	5.91135e+07	1.45019e+08	1.281e+08	1.08428e+08	6.38272e+07	1.11631e+08	2.10222e+08	5.11298e+07	7.22619e+07	4.98904e+07	1.38529e+08	1.3711e+08	2.38203e+08	1.15133e+08	8.07445e+06	6.79677e+08
	High	[R].DPNTGRLNGESNLR.[F]		1	117	P04114	P04114 [1508-1521]		1	1542.76	2	0.983422	0.999895	0.772208	2.3114e+06	2.83875e+06	1.14572e+07	2.2831e+06	2.9624e+06	1.13175e+06	2.44223e+06	2.0288e+06	334199	557262	1.20112e+06	2.08181e+06	2.45474e+06	4.8143e+06	9.16965e+06	3.58114e+06	1.5991e+06	1.0556e+06	5.25073e+06	1.11706e+06	1.56667e+06	2.66806e+06	780066	2.35368e+06	2.44309e+06	7.47719e+06	4.1664e+06	1.35609e+06	1.30732e+06	2.32304e+06	1.93193e+06	3.62116e+06	2.57372e+06	4.01599e+07	7.89602e+06
	High	[K].KLQSTTVMNPYMK.[L]		1	7	P04114	P04114 [4541-4553]		1	1540.79	0		4.58126e-17	3.66332e-17																									1.59029e+06		955451		118198	117064	84649.3		204492		1.93714e+06
	High	[K].IEDGTLASK.[T]		1	949	P04114	P04114 [3936-3944]		0	933.489	31	0.235209	0.785982	0.608271	1.82154e+08	3.95691e+08	1.44362e+09	1.3078e+08	2.24851e+08	5.21869e+08	3.86845e+08	2.55617e+08	1.35453e+08	1.74265e+08	1.54129e+08	3.3246e+08	6.03178e+08	2.09749e+09	1.43087e+09	4.34667e+08	3.21417e+08	1.86848e+08	6.61712e+08	2.75782e+08	3.7574e+08	4.48418e+08	2.29939e+08	2.93987e+08	2.841e+08	7.90931e+08	3.00495e+08	3.57465e+08	2.44074e+08	2.50304e+08	4.91181e+08	5.84119e+08	2.75339e+08	2.29485e+09	1.54431e+09
	High	[R].VSSFYAK.[G]		1	512	P04114	P04114 [1492-1498]		0	801.414	9	0.969825	0.922557	0.797023	2.10722e+07	1.40249e+07	2.04259e+07	2.96662e+07	2.66139e+07	2.45922e+07	8.65711e+06	1.28203e+07	8.7901e+06	7.50927e+06	1.0127e+07	7.28085e+06	1.56522e+07	3.05406e+07	2.34089e+07	6.00185e+06	1.14945e+07	8.36408e+06	8.79295e+06	8.0274e+06	1.16837e+07	1.02115e+07	1.02689e+07	1.4649e+07	1.91017e+07	1.98114e+07	1.46525e+07	1.62746e+07	1.60735e+07	7.69386e+06	1.36844e+07	1.23955e+07	1.64654e+07	1.08417e+09	3.43633e+07
	High	[K].VSQEGLK.[L]		1	216	P04114	P04114 [1731-1737]		0	760.42	9	0.62114	0.686047	0.106361	6.25963e+06	4.96442e+06	4.43431e+07	3.3295e+06	2.44648e+07	5.88742e+06	3.05146e+06	1.91149e+06	996086	654534	655462		1.72175e+06	1.87841e+07	9.40477e+06	4.90376e+06	5.98245e+06	873558	528094	904612		1.80432e+07	6.56374e+06	338688	1.77003e+06						1.88447e+06	1.55221e+07	1.82391e+06	8.10804e+07	2.1785e+06
	High	[K].MDMTFSK.[Q]	1xOxidation [M]	1	863	P04114	P04114 [1587-1593]		0	875.364	26	0.917023	0.686923	0.656871	7.76319e+07	3.02727e+07	1.3528e+08	9.33991e+07	6.92797e+07	1.78253e+08	3.06583e+07	2.29824e+07	1.00732e+07	1.81337e+07	1.82455e+07	2.01962e+07	1.01272e+08	2.89727e+08	1.4625e+08	1.79628e+07	3.46485e+07	2.62864e+07	1.87045e+07	2.21278e+07	4.88588e+07	6.25163e+07	2.58861e+07	4.6038e+07	4.45766e+07	1.05999e+08	3.74914e+07	4.84987e+07	1.1495e+07	2.97502e+07	4.97902e+07	8.84368e+07	5.92493e+07	6.09076e+08	2.3714e+08
	High	[K].LIDVISMYR.[E]	1xOxidation [M7]	1	149	P04114	P04114 [4262-4270]		0	1125.6	3	0.0371835	0.456516	0.32173	7.90714e+06	2.24548e+07	3.91794e+07	1.11817e+07	3.27951e+07	1.15849e+07	6.27735e+06	1.00332e+07	6.89149e+06	3.5771e+06	5.98282e+06	7.38816e+06	1.47016e+08	3.91399e+08	3.19969e+08	2.30903e+07	1.08933e+07	6.88725e+06	3.67165e+07	9.29193e+06	3.4886e+07	2.79568e+07	1.25549e+07	1.51471e+07	2.44803e+07	8.62809e+07	1.17856e+07	1.9284e+07	1.61502e+07	1.69637e+07	2.42586e+07	8.86979e+07	3.53639e+07	1.16814e+07	1.12951e+08
	High	[K].NFATSNK.[M]		1	432	P04114	P04114 [1580-1586]		0	781.384	14	0.999846	0.604365	0.347861	5.56557e+06	4.43253e+06	3.70745e+07	3.90553e+06	2.27597e+06	1.0273e+07	2.22019e+07	8.20875e+06	2.00582e+07	2.64784e+06	6.75984e+06	2.85532e+06	2.70591e+06	8.32305e+06	3.39224e+06	9.12492e+06	6.07546e+06	1.45727e+07	4.4541e+06	9.22655e+06	3.2903e+06	5.8133e+06	1.06136e+07	1.04528e+07	1.17854e+07	1.67341e+06	9.07281e+06	1.71676e+07	1.32316e+07	1.07285e+07	1.5204e+07	1.14603e+07	1.18229e+07	2.79129e+08	5.442e+06
	High	[K].ESQLPTVMDFR.[K]		1	25	P04114	P04114 [621-631]		0	1322.64	0	0.0147575	0.0128792	0.15973	988076	3.83418e+06	4.61765e+06	3.02991e+06	9.20401e+06	2.10929e+06	10813.2		32257		3436.13	122416	1.64516e+07	4.95591e+07	2.35254e+07				152943	89241.6		167048			677965	197810	208551	328617	366090	333082	466371	594562			3.19894e+06
	High	[K].TLQELKK.[L]		1	181	P04114	P04114 [328-334]		1	859.525	5	0.508359	0.561275	0.928995	3.76302e+07	1.57056e+07	8.36294e+07	1.78391e+07	2.69062e+07	1.49232e+07	2.11225e+07	1.08747e+07	1.20819e+07	1.07144e+07	1.50127e+07	1.19607e+07	4.7278e+07	6.7983e+07	6.12434e+07	3.08989e+07	2.18403e+07	1.28844e+07	1.66163e+07	9.98982e+06	2.1393e+07	2.47072e+07	6.38457e+06	2.22869e+07	3.52051e+07	5.01349e+07	2.41343e+07	1.33922e+07	2.52636e+07	1.42425e+07	3.11901e+07	5.05986e+07	2.72165e+07	3.23592e+08	8.04169e+07
	High	[K].FIIPSPK.[R]		1	186	P04114	P04114 [924-930]		0	801.487	11	0.895208	0.412405	0.746874	3.07583e+07	5.97359e+07	1.37268e+08	5.15938e+07	1.49948e+08	2.35012e+07	3.84129e+07	2.89448e+07	1.12581e+07	1.65215e+07	1.5196e+07	2.45136e+07	1.64572e+07	2.27502e+07	1.87401e+07	2.57971e+07	9.49343e+06	7.41083e+06	4.24867e+07	7.81875e+06	4.85043e+07	3.33591e+07	3.36732e+06	7.67605e+07	4.31906e+07	1.84345e+08	3.76698e+07	7.28469e+07	2.11239e+07	8.0741e+07	4.12007e+07	1.38258e+08	9.93727e+07	5.32274e+07	8.41254e+08
	High	[K].LDFSSQADLR.[N]		1	38	P04114	P04114 [2898-2907]		0	1151.57	3	5.32953e-08	4.58126e-17	2.92143e-07								68087.1				797491	7.57377e+06	7.54027e+06	2.2131e+07	1.3188e+06	407459	176497	1.46163e+07	1.13756e+06	6.78457e+06	6.23813e+06	4.93174e+06									7.04451e+06			3.84206e+07
	High	[K].YYELEEK.[I]		1	355	P04114	P04114 [4400-4406]		0	973.451	17	0.114672	0.681446	0.896853	6.65623e+07	1.15848e+08	2.9586e+08	7.03076e+07	2.17593e+08	7.77638e+07	4.97913e+07	4.56127e+07	1.96701e+07	4.03143e+07	4.16657e+07	6.99931e+07	2.26731e+08	4.81589e+08	4.05073e+08	1.40688e+08	9.77239e+07	4.92517e+07	1.92976e+08	5.7585e+07	1.397e+08	1.47199e+08	8.32964e+07	8.92779e+07	1.00921e+08	3.00262e+08	9.2477e+07	1.10984e+08	6.4972e+07	8.90204e+07	1.30891e+08	2.94184e+08	1.43445e+08	7.49766e+08	6.17422e+08
	High	[K].NIILPVYDK.[S]		1	310	P04114	P04114 [3674-3682]		0	1074.62	9	0.931029	0.97227	0.225701	1.0608e+07	2.32091e+07	9.58873e+07	2.96855e+07	9.07141e+07	1.5811e+07	3.24394e+07	2.24965e+07	4.08287e+06	6.26571e+06	5.42223e+06	7.9282e+06	2.12448e+08	6.33381e+08	4.42554e+08	3.12895e+07	2.18062e+07	2.877e+06	2.7874e+07	4.73555e+06	1.93625e+07	1.97189e+07	7.92648e+06	3.51031e+07	2.42727e+07	7.60833e+07	6.76667e+06	9.42517e+06	7.36815e+06	1.43e+07	4.05075e+07	6.51017e+07	1.70067e+07	7.20987e+08	3.50904e+08
	High	[K].AAIQALRK.[M]		1	378	P04114	P04114 [526-533]		1	870.552	27	0.680091	0.0204717	0.961925	2.06875e+07	1.79496e+07	2.24906e+07	1.73979e+07	3.09825e+07	4.5497e+07	1.88226e+07	1.12859e+07	5.86623e+06	3.76009e+06	7.64391e+06	5.48206e+06	8.35213e+06	3.14293e+07	1.33247e+07	6.57981e+06	9.26173e+06	7.0172e+06	5.14938e+06	9.32767e+06	1.00364e+07	1.9673e+07	8.29564e+06	3.13566e+06	5.17577e+06	1.12984e+07	6.9267e+06	3.09542e+06	4.61178e+06	2.26945e+06	3.228e+06	6.33019e+06	8.40145e+06	9.32035e+09	3.06882e+07
	High	[R].NYQLYK.[S]		1	282	P04114	P04114 [636-641]		0	828.425	13	0.973567	0.919447	0.503606	1.82578e+07	1.92511e+07	1.5916e+07	1.51816e+07	3.70745e+07	2.40814e+07	8.24284e+06	1.35866e+07	6.55732e+06	1.09432e+07	3.17748e+06	9.02284e+06	2.93684e+07	2.84101e+07	2.86746e+07	2.2539e+07	1.2681e+07	1.27345e+07	1.25218e+07	6.69644e+06	1.21463e+07	1.10414e+07	5.5431e+06	2.13605e+07	9.47507e+06	1.66714e+07	8.50933e+06	1.07868e+07	1.05996e+07	2.12956e+07	1.21584e+07	1.65165e+07	2.19451e+07	2.90512e+08	1.27515e+07
	High	[K].LFLEETK.[A]		1	91	P04114	P04114 [2468-2474]		0	879.482	7	0.869433	0.950531	0.656515	9.17079e+07	1.22358e+08	2.66214e+08	1.24686e+08	2.08956e+08	9.78022e+07	8.28278e+07	8.91143e+07	4.33982e+07	6.31939e+07	4.21991e+07	5.78017e+07	3.39355e+08	1.08877e+09	5.73497e+08	8.34127e+07	8.37816e+07	3.71616e+07	1.45016e+08	4.01738e+07	1.13431e+08	1.08266e+08	5.24855e+07	1.03295e+08	9.38002e+07	2.84502e+08	6.57106e+07	1.27121e+08	5.30181e+07	8.27796e+07	1.0161e+08	2.11724e+08	1.42158e+08	3.96928e+06	5.36201e+08
	High	[K].NLLVALK.[D]		1	91	P04114	P04114 [4413-4419]		0	770.513	8	0.238091	0.917831	0.0619398	1.05571e+06	415164	2.87794e+06	1.60682e+06	3.9727e+06	2.36529e+06	87978.9	35119.8	495183	169616	205540	1.02622e+06	1.82371e+07	4.25929e+07	3.56653e+07	1.52781e+06	1.52804e+06	315413	2.57696e+06	8.76884e+06	1.4843e+06	4.2143e+06	1.94476e+06	946653	386511	2.40666e+06	210480	314485	971539	1.07862e+06	312946	1.57764e+07	2.79554e+06	3.87029e+06	4.33983e+07
	High	[K].EAQEVFK.[A]		1	322	P04114	P04114 [4279-4285]		0	850.431	17	0.0642292	0.512518	0.562816	3.55877e+07	9.48034e+07	2.72391e+08	3.53034e+07	2.52443e+07	1.39017e+08	8.60329e+07	7.82621e+07	4.01247e+07	4.85231e+07	7.41436e+07	1.38364e+08	2.47528e+08	7.10958e+08	5.9391e+08	1.94332e+08	1.5579e+08	7.14265e+07	2.40465e+08	7.22497e+07	1.49887e+08	2.13938e+08	5.51177e+07	1.36883e+08	1.6096e+08	4.21508e+08	1.07255e+08	1.11213e+08	1.01568e+08	9.95833e+07	2.16249e+08	4.30727e+08	1.89936e+08	1.55551e+09	6.70466e+08
	High	[R].TPALHFK.[S]		1	192	P04114	P04114 [1318-1324]		0	813.462	10	0.950382	0.25109	0.995231	2.0803e+07	3.54718e+07	1.25127e+08	1.95983e+07	1.17387e+08	2.3339e+08	8.84823e+07	6.21612e+07	3.88444e+07	4.54931e+07	2.61686e+07	7.81702e+07	3.12516e+08	1.04557e+09	9.38031e+08	3.8664e+07	4.64292e+07	2.90264e+07	3.41175e+07	2.46687e+07	5.20362e+07	2.21698e+07	3.93298e+07	9.45154e+07	1.1533e+08	1.56714e+08	1.22834e+08	6.60887e+07	6.1097e+07	5.96274e+07	9.47941e+07	1.49796e+08	7.70782e+07	1.34837e+09	6.08578e+08
	High	[K].LDVTTSIGR.[R]		1	152	P04114	P04114 [3690-3698]		0	961.531	4	0.758037	0.999895	0.9851	7.41837e+07	1.22357e+08	2.57522e+08	1.06694e+08	1.25727e+08	6.66097e+07	6.71303e+07	4.62065e+07	2.61301e+07	3.3146e+07	2.31918e+07	5.00726e+07	1.87901e+08	3.7206e+08	3.22239e+08	7.8924e+07	7.46802e+07	4.06963e+07	1.47903e+08	7.63107e+07	1.1998e+08	6.30236e+07	7.89156e+07	6.96373e+07	6.69778e+07	2.26837e+08	4.06634e+07	5.56783e+07	3.88695e+07	6.0644e+07	1.00477e+08	1.17846e+08	7.16246e+07	4.65043e+08	3.47875e+08
	High	[R].LLDHRVPQTDMTFR.[H]		1	9	P04114	P04114 [1211-1224]		1	1728.88	0	0.942852	0.653771	0.961097	2.27065e+06	1.01918e+06	512793	571315	1.27357e+06	554644	426048	1.01503e+06	342393	402549	512769		2.02248e+06	1.63316e+07	2.78006e+06	364824	971774	268067	368164	523571	736167			1.07758e+06	1.2029e+06	1.31849e+06		616203	1.41919e+06	654205	660723	1.20707e+06	828215	1.21961e+07	5.73379e+06
	High	[R].ITLPDFR.[L]		1	46	P04114	P04114 [2706-2712]		0	861.483	2	0.0592088	0.222931	0.883376	2.17004e+06	2.13761e+06	1.40957e+07	5.69002e+06	2.82317e+07	2.80112e+06	2.6434e+06	2.42309e+06	905254	1.36361e+06	1.54153e+06	3.89765e+06	3.54742e+07	2.48886e+08	7.40409e+07	7.19462e+06	9.79676e+06	758960	8.55434e+06	7.27683e+06	1.13192e+07	7.92147e+06	4.73041e+06	6.42869e+06	6.87834e+06	4.00199e+07	6.10357e+06	6.47513e+06	2.81383e+06	5.70531e+06	2.1407e+07	8.78892e+06	7.41758e+06		6.63422e+07
	High	[K].FIIPGLK.[L]		1	166	P04114	P04114 [3730-3736]		0	787.508	7	0.742875	0.859233	0.891079	1.32707e+08	1.24565e+08	2.10507e+08	1.26166e+08	6.20598e+07	6.44284e+07	1.67212e+07	9.65913e+06	1.56959e+07	1.14622e+07	2.85736e+07	1.58438e+07	3.62051e+07	6.05682e+07	6.06014e+07	3.44761e+07	1.56429e+08	2.56952e+07	9.30518e+07	2.75997e+07	1.90735e+07	3.18133e+07	5.68224e+07	4.16454e+07	3.70773e+07	9.30675e+07	2.38343e+07	5.22298e+07	4.2631e+07	4.99829e+07	6.92711e+07	4.88826e+07	4.11049e+07	1.10122e+08	1.03161e+08
	High	[R].QSWSVCK.[Q]	1xCarbamidomethyl [C6]	1	372	P04114	P04114 [961-967]		0	894.414	12	0.0357499	0.0303511	0.962612	1.58348e+07	1.1378e+07	1.57807e+07	1.70512e+07	1.02823e+07	5.63553e+07	5.07135e+06	5.18183e+06	4.88808e+06	4.90916e+06	1.31107e+06	1.61312e+06	1.83699e+06	2.37244e+07	5.52502e+06	2.13352e+06	705416	532429	1.65215e+06	2.41902e+06	1.98779e+06	3.16242e+06	661670	3.14709e+06	1.89851e+06	1.29146e+07	6.22317e+06	2.85574e+06	379411	1.73e+06	1.73905e+06	3.87283e+06	3.17141e+06	7.54243e+08	1.74065e+07
	High	[K].IREVTQR.[L]		1	237	P04114	P04114 [2443-2449]		1	901.521	11	0.336172	0.157872	0.598816	8.10384e+07	7.53264e+07	8.8273e+08	4.13117e+07	5.66661e+07	1.69032e+08	7.61847e+07	4.68045e+07	4.45734e+07	8.06249e+06	5.94783e+07	8.41288e+06	1.77091e+07	3.8395e+07	1.08046e+07	1.75143e+08	9.8326e+07	5.53361e+07	2.42835e+08	9.61625e+07	2.93699e+08	2.81216e+08	1.30206e+08	4.13068e+07	2.74187e+07	1.84729e+07	7.79319e+06	1.63463e+08	1.06475e+07	4.84299e+07	1.6588e+07	1.85174e+07	1.80732e+07	5.14688e+08	1.80018e+07
	High	[K].SQAIATK.[K]		1	1	P04114	P04114 [4479-4485]		0	718.409	0			3.66332e-17
	High	[R].FQFPGKPGIYTR.[E]		1	3	P04114	P04114 [4202-4213]		0	1410.75	0			3.66332e-17																																		2.9421e+06
	High	[K].IGVELTGR.[T]		1	90	P04114	P04114 [2005-2012]		0	844.489	2	0.300177	0.983171	0.934589	1.0737e+08	2.60118e+08	7.92898e+08	2.08919e+08	4.77256e+08	1.59417e+08	1.08993e+08	1.00433e+08	2.17523e+07	5.14304e+07	2.6263e+07	6.04932e+07	6.33371e+08	2.09515e+09	1.29286e+09	1.59603e+08	2.4998e+08	4.90358e+07	3.52599e+08	1.49173e+08	1.33847e+08	2.11682e+08	5.41068e+07	1.22803e+08	1.77059e+08	4.72797e+08	9.58908e+07	6.63283e+07	9.76414e+07	7.23556e+07	1.64867e+08	4.58286e+08	1.24504e+08	3.00757e+09	1.62757e+09
	High	[K].QVFLYPEK.[D]		1	307	P04114	P04114 [140-147]		0	1023.55	7	0.973567	0.975154	0.771965	1.17041e+08	1.66033e+08	3.41479e+08	1.33811e+08	1.16641e+08	9.50337e+07	7.07409e+07	6.18747e+07	3.65321e+07	4.80985e+07	1.69697e+07	5.09439e+07	1.37642e+08	3.63365e+08	3.43236e+08	1.00578e+08	8.75127e+07	3.21149e+07	1.44451e+08	3.52892e+07	7.96824e+07	7.77081e+07	3.69585e+07	8.50252e+07	8.3751e+07	2.48742e+08	6.16608e+07	6.81755e+07	5.85425e+07	8.78325e+07	9.58168e+07	1.60946e+08	9.27523e+07	5.04595e+07	2.84165e+08
	High	[K].LVGFIDDAVKK.[L]		1	5	P04114	P04114 [2393-2403]		1	1204.69	0
	High	[K].QHLFVK.[E]		1	76	P04114	P04114 [1477-1482]		0	771.451	4	0.934625	0.0324052	0.997599	455812	2.69704e+06		3.74263e+06	1.11225e+07	2.04211e+06	2.56685e+07	1.81398e+07	1.06127e+06	3.37964e+06	2.40517e+06	3.52046e+06	4.78748e+07	2.65575e+08	7.87966e+07	2.46867e+06	4.18436e+06	2.66141e+06	1.74977e+06	2.46437e+06	3.75747e+06	4.79114e+06	1.88453e+06	1.28816e+07	2.11594e+07	3.41311e+07	2.70102e+07	4.40405e+06	1.13119e+07	6.98708e+06	1.19478e+07	1.62085e+07	1.09087e+07	2.99677e+08	4.23623e+07
	High	[K].AHLNIK.[S]		1	63	P04114	P04114 [3974-3979]		0	695.42	3	0.944833	0.891727	0.706637	6.58978e+06	668323	6.65053e+06	2.84441e+06	1.12448e+06	1.14498e+06	782148		1.48083e+06		637546	1.04204e+06		2.74791e+06		1.52164e+06		5.36981e+06	235670	431232	6.00712e+06	6.51757e+06	415820	371899			748971		1.99475e+06	1.58329e+06	3.0915e+06	2.24585e+06		1.16446e+07	5.07684e+06
	High	[K].TSQCTLK.[E]	1xCarbamidomethyl [C4]	1	67	P04114	P04114 [94-100]		0	837.413	3	0.880793	0.614865	0.827674	5.4583e+07	969294	8.20208e+06	2.83205e+06	11159.6	2.06841e+06	389146	466123	197311	483227	5024.28	139847	177154		310068		121823	1.03358e+06	173521	1.51619e+06		2.83034e+06	853630	2872	355023	4.32908e+06	239366	223444	310934	230076		1.1258e+06		2.64058e+06
	High	[K].LTIFK.[T]		1	74	P04114	P04114 [4036-4040]		0	621.397	7	0.969825	0.490098	0.680959	1.21864e+06	3.22832e+06	2.76201e+06	3.8637e+06	6.10178e+06	4.62549e+06	1.38519e+06	3.54648e+06	1.39037e+06	3.07861e+06	2.05381e+06	2.03726e+06	3.335e+06	1.17116e+07	5.5551e+06	1.48976e+06	3.20385e+06	1.94249e+06	3.2856e+06	5.91989e+06	5.83518e+06	5.95687e+06	2.8553e+06	2.09658e+06	1.29775e+06	3.04607e+06	6.17205e+06	713293	1.13886e+06	879673	859194	6.05947e+06	2.5772e+06	8.74731e+06	1.433e+07
	High	[K].IVSLIK.[N]		1	14	P04114	P04114 [4407-4412]		0	672.465	1	0.903877	0.619943	0.993506	1.38191e+06	18089.2	38277.7	20816.7		482054	189880	446984	432315	221198	316035	375128		37227.2	126218	111824	468425	588018	465394	205803	485477	400303	807479	519033	740370	35935.2	545541		626263			14481.7	20706		51679.9
	High	[R].VPQTDMTFR.[H]	1xOxidation [M6]	1	191	P04114	P04114 [1216-1224]		0	1110.52	4	0.765407	0.999261	0.958204	1.34309e+07	1.26185e+07	6.68143e+07	1.83435e+07	3.28318e+07	1.92666e+07	9.76757e+06	8.93375e+06	2.66108e+06	6.07166e+06	5.58238e+06	7.21531e+06	3.1677e+07	6.41471e+07	5.18974e+07	1.80249e+07	1.00802e+07	5.35026e+06	1.66269e+07	6.56786e+06	1.24265e+07	2.05313e+07	3.35393e+06	7.50729e+06	1.18687e+07	2.42908e+07	1.17816e+07	1.27683e+07	1.01417e+07	1.08732e+07	1.14416e+07	2.46988e+07	1.99157e+07	4.64093e+07	7.78978e+07
	High	[R].KGNVATEISTERDLGQCDR.[F]	1xCarbamidomethyl [C17]	1	1	P04114	P04114 [196-214]		2	2149.03	0
	High	[R].ALVDTLK.[F]		1	116	P04114	P04114 [1028-1034]		0	759.461	15	0.989496	0.95421	0.281641	1.16363e+08	1.84159e+08	5.80188e+08	1.36769e+08	3.67553e+08	1.23709e+08	1.12609e+08	1.06786e+08	1.73044e+07	5.54223e+07	3.81615e+07	5.65046e+07	6.41354e+08	1.41518e+09	1.14104e+09	2.89046e+08	1.01425e+08	2.57037e+07	1.46698e+08	5.7671e+07	7.5233e+07	8.6177e+07	4.86977e+07	1.18103e+08	1.34576e+08	5.26759e+08	9.07314e+07	8.3885e+07	7.3161e+07	1.2795e+08	1.34777e+08	3.71156e+08	1.66065e+08	6.54153e+07	1.02736e+09
	High	[K].KLNELSFK.[T]		1	41	P04114	P04114 [2403-2410]		1	978.562	4	0.559726	0.841209	0.911433		522143	433810		2.68834e+06	851915	3.58262e+06	3.10946e+06	189302	255351	3.13297e+07		1.32592e+07	7.33363e+07	4.74909e+07	85015.4	925123	201546	236146	86358.8	195834	523008		558885	3.4762e+06	8.23472e+06	9.71098e+06	498681	1.44714e+06	1.17189e+06	1.07702e+06	1.10977e+07	698205	1.06429e+08	6.46818e+07
	High	[R].VNDESTEGKTSYR.[L]		1	2	P04114	P04114 [1079-1091]		1	1485.68	0
	High	[R].ANLFNK.[L]		1	64	P04114	P04114 [345-350]		0	706.388	2	0.978294	0.955986	0.680011	4.08559e+07	5.12853e+07	2.50712e+07	3.31341e+07	6.21939e+07	4.2524e+07	1.73689e+07	2.01237e+07	1.37678e+07	1.29696e+07	1.05992e+07	1.14208e+07	3.19184e+07	5.72349e+07	3.57326e+07	9.32103e+06	2.15974e+07	1.82465e+07	1.64745e+07	1.23666e+07	2.37695e+07	1.95953e+07	1.36041e+07	2.3812e+07	1.81333e+07	3.24237e+07	1.15152e+07	1.50803e+07	1.36479e+07	2.7649e+07	2.38525e+07	8.63059e+07	4.61044e+07	5.95204e+07	3.01821e+08
	High	[K].DYFEK.[L]		1	40	P04114	P04114 [2388-2392]		0	701.314	2	0.853066	0.0728531	0.163597	1.65926e+07	1.43494e+07	2.061e+07	1.3281e+07	4.97489e+07	5.91594e+06	1.08863e+07	8.29499e+06	4.74405e+06	6.74036e+06	6.51703e+06	4.40547e+06	1.60278e+07	7.15313e+07	3.03081e+07	3.43374e+06	9.30229e+06	7.71812e+06	1.47933e+06	2.19469e+06	6.06752e+06	9.48117e+06	3.01607e+06	1.78874e+06	4.01548e+06	5.48267e+06	1.93054e+06	2.64182e+06	3.54464e+06	2.43101e+06	2.8772e+06	3.56962e+06	3.5419e+06		6.39247e+06
	High	[K].LSLPDFK.[E]		1	92	P04114	P04114 [3315-3321]		0	819.461	7	0.00841555	0.169416	0.858149	5.32215e+06	9.13429e+06	3.87089e+07	9.89995e+06	4.00633e+07	4.69403e+06	3.33214e+06	6.19053e+06	1.65201e+06	3.76446e+06	6.96706e+06	1.85986e+07	1.82844e+08	3.79967e+08	2.16655e+08	3.30487e+07	2.45259e+07	5.25297e+06	8.38846e+06	9.5731e+06	1.15554e+07	3.33842e+07	9.91054e+06	4.08955e+07	6.93782e+06	1.55411e+08	6.05764e+06	1.10869e+07	2.98778e+06	2.30889e+07	6.87503e+07	7.84952e+07	2.95462e+07	1.3845e+06	2.57358e+08
	High	[K].LTALTKK.[Y]		1	68	P04114	P04114 [2142-2148]		1	774.508	2	0.2464	0.526617	0.57727		405704	5.02072e+06	776330			531751	365201	107800	305016	221369	641175	1.85056e+06	8.53484e+06	3.58943e+06	1.92436e+06		773718	1.39391e+06	441894		1.2814e+06	424429	969003	1.16591e+06	1.93255e+06	618451		288337	489010	841409	5.0245e+06	888523
	High	[K].MDMTFSK.[Q]		1	65	P04114	P04114 [1587-1593]		0	859.369	5	0.877255	0.790859	0.514106	2.86089e+07	4.5164e+07	1.10116e+08	3.61734e+07	1.02284e+08	4.13823e+07	2.66327e+07	3.605e+07	1.79225e+06	7.99086e+06	8.15423e+06	5.80472e+06	2.21125e+08	6.9648e+08	4.42889e+08	2.91658e+07	2.02401e+07	1.14643e+07	3.82878e+07	7.99477e+06	1.41998e+07	4.14919e+07	9.47441e+06	3.43773e+07	4.38562e+07	1.51125e+08	1.99848e+07	1.13004e+07	1.4016e+07	2.12229e+07	2.97683e+07	8.09504e+07	2.87849e+07	4.33306e+08	2.74451e+08
	High	[K].TLLK.[A]		1	133	P04114	P04114 [2912-2915]		0	474.329	6	0.968214	0.556473	0.735072	8.61282e+06	1.84857e+07	3.55812e+07	9.94878e+06	1.00173e+07	8.83483e+06	1.97604e+07	4.10005e+06	7.77062e+06		3.89421e+06	2.03402e+06	3.47759e+06	5.31019e+06	4.99889e+06	1.45343e+07	7.0817e+06	7.69465e+06	5.0818e+06	3.19323e+07	1.02599e+07	2.29771e+07	5.30414e+07	4.35502e+06	5.38065e+06	3.70463e+06	3.09634e+06	1.34222e+07	2.64147e+06	4.94761e+06	5.82496e+06	7.85633e+06	8.32277e+06	4.95798e+07	1.48938e+07
	High	[K].GVISIPR.[L]		1	35	P04114	P04114 [1122-1128]		0	741.462	1	4.74369e-17	0.396208	5.20321e-08	2.74628e+07	5.98406e+07	2.07532e+08	3.51894e+07	752373	6.76137e+07	1.0321e+08	4.90848e+07	5.72567e+07	8.93303e+07	1.36179e+07	705211	3.01943e+06	4.53326e+07	913171	565885	235081	385390	1.51103e+06	2.51942e+06	4.03583e+06	961292	259837	3.79145e+07	4.05588e+07	1.91019e+06	1.72107e+07	422042	2.25794e+07	5.27439e+07	3.47735e+07	1.55063e+06	277337	2.74408e+07	7.39444e+06
	High	[K].FLDSNIK.[F]		1	287	P04114	P04114 [1430-1436]		0	836.451	16	3.57105e-05	0.419897	0.301912	5.96713e+07	5.98784e+07	9.21416e+07	4.41932e+07	4.94345e+07	3.19317e+07	9.78174e+06	9.92242e+06	1.25036e+07	1.20882e+07	1.06152e+07	1.24743e+08	3.9404e+08	7.21881e+08	1.12141e+09	2.0572e+08	1.85734e+08	1.05062e+08	3.1321e+08	7.49003e+07	1.33728e+08	1.91422e+08	8.55693e+07	1.91305e+07	1.47065e+07	4.7566e+07	1.17908e+07	1.3869e+07	1.13076e+07	3.29507e+07	1.61658e+07	4.02897e+08	1.87423e+08	7.44466e+07	1.59548e+09
	High	[K].LRLEPLK.[L]		1	120	P04114	P04114 [1814-1820]		1	868.561	13	0.000590476	0.00495421	4.7291e-05	1.25133e+06	3.48079e+06	6.94828e+06	7.54441e+06	6.77538e+08	6.82922e+06	1.20104e+08	8.79212e+07	3.54593e+07	7.16553e+07	6.76517e+07	2.33516e+06	5.77452e+08	1.34146e+09	9.59245e+08	962544	6.21352e+07	3.27001e+06	2.89281e+06	1.66549e+06	3.88589e+06	6.74452e+06	7.25063e+06	1.95167e+08	1.42338e+08	2.92335e+08	1.58286e+08	7.17584e+07	1.48833e+08	7.15708e+07	7.36877e+07	2.35208e+08	1.41982e+08	9.19744e+08	9.10047e+08
	High	[KA].EALK.[EL]		1	115	P04114	P04114 [617-620]; [2464-2467]		0	460.277	19	0.24743	0.32058	0.193547	8.80947e+06	1.28908e+07	2.7871e+07	6.2144e+06	2.78607e+07	1.03579e+07	5.4523e+07	3.76934e+07	3.47547e+07	5.05364e+07	3.84422e+07	1.12866e+07	4.59802e+07	1.28949e+08	8.66814e+07	4.15634e+07	8.2168e+07	5.03693e+07	1.55378e+07	4.66568e+07	5.60233e+07	1.06395e+08	5.30718e+07	6.91736e+07	5.20373e+07	3.30205e+07	6.30178e+07	5.12162e+07	7.35486e+07	5.33501e+07	5.95913e+07	8.09863e+07	6.25094e+07	8.19332e+08	7.57046e+07
	High	[K].LAIPEGK.[Q]		1	14	P04114	P04114 [133-139]		0	727.435	1	0.108171	0.928166	0.726032					1.41627e+06		515157	449274					1.38114e+06	1.59689e+07	2.78572e+06										722524	615331	506424					1.06839e+06		2.12202e+07	3.40237e+06
	High	[K].LYSILK.[I]		1	62	P04114	P04114 [2758-2763]		0	736.46	2	0.955148	0.493368	0.204083			491312	295767	154654	10933.6			100256	384508	6.90025e+06	165332	31936.3	425045	28720.4	195837	439788	243808	377850	1.22592e+06	469813	366481	439115	1.90135e+06	343484	33552.1	8615.55	1.78722e+06	233544	1.35277e+06	2.3382e+06	2.47932e+07	4.23501e+07	1.58533e+07	9.57085e+06
	High	[K].HINIDQFVR.[K]		1	40	P04114	P04114 [2101-2109]		0	1141.61	3	0.866303	0.910371	0.88813	1.37767e+06	54197.7	1.58371e+06	2.29288e+06	605883	1.58288e+06	966601	1.27107e+06	707223	1.33141e+06	11826.1	511018	1.90026e+06	1.90393e+07	878117	347421	965027	563403	1.21479e+06	556421	749097	723527	1.08683e+06	1.31281e+06	832512	1.76844e+06	719377	1.14943e+06	892740	1.46901e+06	3318.21	45620.5	1.17984e+06	5.9704e+06	2.90013e+06
	High	[R].DLGQCDRFK.[P]	1xCarbamidomethyl [C5]	1	45	P04114	P04114 [208-216]		1	1138.53	6	0.837075	0.759276	0.596616	1.58395e+07	1.09451e+07	3.77359e+07	1.66735e+07	7.49642e+07	4.68196e+06	1.41201e+07	1.04437e+07	6.64688e+06	1.02002e+07	7.70815e+06	1.26029e+07	4.15439e+07	1.70286e+08	7.35575e+07	1.09153e+07	1.3279e+07	5.79381e+06	1.04949e+07	1.80586e+06	8.66515e+06	1.93699e+07	2.8143e+06	1.41418e+07	1.7746e+07	3.28196e+07	1.52665e+07	8.5885e+06	1.48222e+07	1.37816e+07	1.65242e+07	1.48262e+07	6.34761e+06	4.85588e+07	5.87891e+07
	High	[K].FIAESK.[R]		1	61	P04114	P04114 [4513-4518]		0	694.377	1	0.937057	0.90631	0.744397	5.61777e+07	4.06574e+07	1.41238e+07	4.04962e+07	6.44803e+07	4.19961e+07	5.47062e+07	3.85783e+07	2.51673e+07	1.75144e+07	3.94523e+07	883435	4.75709e+06	1.10301e+07	1.80828e+06	6.74029e+07	4.85709e+07	3.50839e+07	1.93694e+06	2.76689e+07	3.64829e+07	4.12779e+07	3.21519e+07	3.78195e+07	4.6671e+07	996982	9.61262e+06	4.65779e+07	1.60751e+07	2.68611e+07	5.18653e+07	1.3633e+07	5.29522e+07	1.05405e+08	2.71081e+06
	High	[K].EFLK.[T]		1	35	P04114	P04114 [3160-3163]		0	536.308	5	0.95839	0.999552	3.66332e-17	1.25681e+09	1.07763e+09	6.41677e+08	5.60732e+08	3.44353e+08	1.31244e+09	3.55283e+08	2.55993e+08	4.29858e+08	4.86984e+08	4.61099e+08	3.34942e+08	1.70468e+08	3.77457e+08	4.46608e+08	3.28574e+08	3.74407e+08	4.75982e+08	5.37957e+08	3.5327e+08	3.89066e+08	3.30134e+08	3.33457e+08	5.47573e+08	4.07568e+08	7.26215e+08	4.01792e+08	4.29143e+08	9.18641e+08	5.04907e+08	4.36769e+08	663123		3.17831e+08	6.13796e+06
	High	[R].YELK.[L]		1	62	P04114	P04114 [129-132]		0	552.303	3	0.81448	0.125879	0.887482	3.63984e+06	8.83896e+06	1.55559e+07	4.1846e+06	3.08653e+06	4.15442e+06	6.62786e+06	2.1499e+06	2.38977e+06	466003	1.51495e+06	284104	2.04315e+06	6.33066e+06	2.60504e+06	3.98207e+06	2.09006e+06	1.668e+06	1.40101e+06	2.215e+06	1.0069e+06	1.58322e+06	2.48306e+06	1.51005e+06	485146	1.05443e+06	2.32895e+06	465251	658293	2.26331e+06	714487	4.1782e+06	4.24258e+06	1.62624e+07	6.32637e+06
	High	[K].VHELIER.[Y]		1	59	P04114	P04114 [2341-2347]		0	895.5	0	4.74369e-17	4.58126e-17	0.501301				897257		3.16606e+06																													592277
	High	[R].SVMAPFTMTIDAHTNGNGK.[L]	1xOxidation [M]	1	5	P04114	P04114 [1898-1916]		0	2007.93	0	0.188325	0.191893	0.92371	636897	928807	2.60533e+06	625876									1.67214e+06	1.21244e+07	3.49762e+06											368352	116175					676172			4.78576e+06
	High	[K].INPLALK.[E]		1	74	P04114	P04114 [2819-2825]		0	768.498	5	0.702882	0.744837	0.853855	2.19921e+07	3.20229e+07	8.02021e+07	5.8309e+07	9.70312e+07	574470	5.88554e+07	6.79619e+07	2.05744e+07	5.13469e+07	2.02244e+07	5.9901e+07	3.32341e+08	9.69779e+08	4.36032e+08	6.20388e+07	1.07978e+08	1.62332e+07	9.83319e+07	1.42595e+07	5.46738e+07	6.46028e+07	2.00236e+07	7.61327e+07	6.563e+07	2.91811e+08	2.3537e+07	1.0363e+08	2.97069e+07	5.30985e+07	8.00393e+07	2.96809e+07	2.26676e+07	3.22065e+08	7.37414e+07
	High	[VK].TELR.[GV]		1	165	P04114	P04114 [353-356]; [4041-4044]		0	518.293	17	0.931918	0.812094	0.000655639	6.07684e+09	4.60285e+09	4.19057e+09	3.28185e+09	3.34695e+09	4.99095e+09	1.95313e+09	1.2785e+09	1.84795e+09	1.96957e+09	1.19466e+09	1.96731e+09	1.04731e+09	4.73331e+09	4.31245e+09	1.28893e+09	2.41036e+09	2.59163e+09	3.40034e+09	2.32294e+09	2.30659e+09	2.34043e+09	2.29598e+09	2.19236e+09	1.83374e+09	3.16313e+09	2.03794e+09	2.72063e+09	2.67418e+09	2.43828e+09	1.76252e+09	1.3449e+08	1.30584e+08	2.22208e+08	3.95227e+08
	High	[K].ATLR.[I]		1	121	P04114	P04114 [1643-1646]		0	460.288	7	0.675922	0.88404	0.890488	2.14028e+07	1.17044e+07	1.24623e+07	8.09279e+06	1.95828e+07	7.51423e+06	1.74885e+07	6.91019e+07	9.9302e+06	1.27703e+07	6.41551e+06	5.89097e+06	3.32695e+07	3.26939e+07	3.50458e+07	7.62398e+06	6.36097e+07	8.16867e+06	7.48817e+06	2.26045e+06	3.24969e+07	1.53368e+07		1.53381e+07	1.77716e+07	9.53705e+07	8.98382e+06	9.00536e+06	1.15591e+07	2.38181e+07	1.43527e+07	2.16268e+07	1.94223e+07	9.29138e+07	4.98097e+07
	High	[RQT].ELLK.[DSK]		1	227	P04114	P04114 [4271-4274]; [4475-4478]; [4537-4540]		0	502.324	16	0.420019	0.948684	0.952048	3.9024e+07	4.34527e+07	3.0791e+07	2.37072e+07	4.42352e+07	6.12083e+07	1.08421e+07	1.4888e+07	1.37443e+07	1.47066e+07	1.28748e+07	1.70046e+06	5.23982e+06	1.0529e+07	6.37703e+06	1.41555e+07	5.15179e+06	2.34044e+07	2.86041e+07	1.56558e+07	837225	8.91048e+06	3.99145e+07	2.05784e+07	1.64547e+07	2.74718e+07	1.92908e+07	1.63332e+07	3.08774e+07	1.85774e+07	1.6614e+07	4.79225e+07	3.00155e+07	4.03949e+08	1.58532e+08
	High	[SK].FLLK.[TA]		1	114	P04114	P04114 [90-93]; [1931-1934]		0	520.349	13	0.815459	0.937389	0.860499	5.23993e+06	6.10934e+06	1.04873e+07	5.3501e+06	2.49002e+07	4.19043e+06	4.73863e+06	5.76891e+06	2.41126e+06	3.50282e+06	1.92968e+06	2.07638e+06	2.7065e+07	4.3756e+07	1.69023e+07	1.64047e+06	3.34787e+06	1.71372e+06	2.92012e+06	1.43169e+06	3.72275e+06	4.29382e+06	1.9327e+06	3.52389e+06	4.84713e+06	6.41582e+06	7.71034e+06	2.91091e+06	4.55639e+06	3.01632e+06	4.12776e+06	5.77841e+06	4.1949e+06	4.74368e+07	1.615e+07
	High	[KL].ALLK.[KG]		1	240	P04114	P04114 [111-114]; [226-229]		0	444.318	22	0.955445	0.95197	0.749732	2.21695e+07	1.60499e+07	1.31767e+07	1.40301e+07	5.60939e+07	1.84194e+07	2.52493e+07	1.74837e+07	1.19452e+07	1.5465e+07	1.07004e+07	1.05134e+07	3.01619e+07	5.73526e+07	2.59437e+07	9.34188e+06	1.55218e+07	1.26282e+07	1.52766e+07	7.36795e+06	1.21404e+07	1.78851e+07	9.95714e+06	1.74963e+07	1.60538e+07	2.44749e+07	1.56584e+07	1.51981e+07	1.9257e+07	1.68472e+07	1.58174e+07	1.69853e+07	1.3852e+07	1.67792e+09	3.64824e+07
	High	[R].LNGESNLR.[F]		1	256	P04114	P04114 [1514-1521]		0	902.469	5	0.0949833	0.314339	0.683103	2.798e+07	2.62648e+07	5.95759e+07	1.67776e+07	3.28803e+07	3.99153e+07	5.8293e+07	4.89185e+07	2.9221e+07	3.36204e+07	2.70929e+07	5.36802e+07	9.31214e+07	2.20801e+08	8.89106e+07	7.17188e+07	6.05699e+07	2.74875e+07	1.07111e+08	3.67823e+07	7.81097e+07	7.20134e+07	2.87875e+07	4.82685e+07	1.03119e+08	7.69574e+07	5.03338e+07	7.21252e+07	5.70981e+07	4.96364e+07	9.45205e+07	1.22118e+08	7.27615e+07	3.59432e+07	3.53092e+07
	High	[K].LDFR.[E]		1	147	P04114	P04114 [3763-3766]		0	550.298	11	0.258874	0.553695	0.974239	1.67307e+07	4.05828e+07	8.40581e+07	2.81228e+07	1.97275e+07	1.73491e+07	1.85666e+07	1.77941e+07	8.74656e+06	1.21893e+07	1.05401e+07	1.99994e+07	8.35806e+07	3.14958e+08	1.15611e+08	2.68413e+07	2.58094e+07	1.57907e+07	6.13026e+07	1.23727e+07	4.21652e+07	3.40569e+07	1.56916e+07	3.57972e+07	3.0809e+07	7.5118e+07	2.52968e+07	2.60915e+07	2.05362e+07	2.45453e+07	3.08273e+07	4.36756e+07	3.16983e+07	3.56634e+08	2.38059e+08
	High	[K].AQIPILR.[M]		1	141	P04114	P04114 [3431-3437]		0	810.52	8	8.66022e-07	7.18664e-06	0.0400016	1.09718e+07	2.43479e+07	4.68802e+07	3.20287e+07	6.47165e+06	1.84396e+07	2.82231e+06	4.11169e+06	1.66787e+06	490193	1.97479e+06	3.19833e+07	1.42927e+08	3.84287e+08	3.21547e+08	5.56868e+07	1.76879e+07	9.43544e+06	4.6833e+07	1.28024e+07	7.15272e+07	9.69311e+07	1.43015e+07	5.28582e+07	5.16468e+07	1.91319e+08	4.3051e+07	2.64196e+07	2.28674e+07	5.48834e+07	8.55411e+07	1.21297e+08	7.67297e+07	3.19646e+06	3.95917e+08
	High	[K].MLETVR.[T]	1xOxidation [M1]	1	808	P04114	P04114 [1312-1317]		0	764.397	31	0.0216135	0.134217	0.325091	7.45388e+07	6.1278e+07	1.84041e+08	5.35711e+07	1.13716e+08	5.39891e+07	1.3573e+08	9.15539e+07	5.54123e+07	6.35322e+07	5.33795e+07	6.67169e+07	1.14868e+08	3.55643e+08	1.76874e+08	2.28895e+08	2.62321e+08	1.79228e+08	1.41426e+08	1.5132e+08	2.84945e+08	2.44786e+08	1.23567e+08	1.73196e+08	2.01623e+08	1.23187e+08	1.28401e+08	1.3754e+08	1.592e+08	1.47179e+08	2.82395e+08	1.93095e+08	1.41337e+08	2.28865e+09	1.45203e+08
	High	[K].TILGTMPAFEVSLQALQK.[A]		1	3	P04114	P04114 [2592-2609]		0	1947.06	0
	High	[K].FLDMLIK.[K]	1xOxidation [M4]	1	14	P04114	P04114 [2419-2425]		0	895.496	3	0.942852	0.724635	0.806728	57994.3	253862	729023		1.10596e+06		498308	669183	336390	453854	80543.8	34592.6	382173	735357	2.45626e+06	169350	614636	89944		44957.3	523915		302917	513964	632600	2.01359e+06	273273	447959	993237	1.06093e+06	1.08748e+06	2.90578e+06	1.24936e+06	630561	7.88385e+06
	High	[K].AIQSLK.[T]		1	34	P04114	P04114 [4286-4291]		0	659.409	2	0.900031	0.901756	0.995845	9.57121e+06	1.23175e+07	3.8329e+06	5.15231e+06	5.96787e+06	7.5755e+06	4.92099e+06		5.20669e+06	1.02332e+07	3.82674e+06	5.87386e+06	3.62223e+06	2.32817e+07	6.53563e+06	1.4021e+06	2.50944e+06	1.6212e+06	1.28151e+07	3.85898e+06		3.54679e+06	2.76367e+06	8.14742e+06	3.35317e+06	9.82618e+06	9.87338e+06	2.7868e+06	1.12717e+06	5.96193e+06	7.64665e+06	5.46016e+06	2.25941e+06	6.95105e+06
	High	[R].AYLR.[I]		1	24	P04114	P04114 [775-778]		0	522.303	2	0.978138	0.989539	0.296261	724888		876200	357149	821939	771742					209858	56272.7	837592	3.92337e+06	836959	982464						132478	66663.3				766011	642605	1.54415e+06					3.50408e+06	1.03385e+06
	High	[R].EELCTMFIR.[E]	1xCarbamidomethyl [C4]; 1xOxidation [M6]	1	47	P04114	P04114 [4214-4222]		0	1214.55	0	0.959841	0.58857	0.704775	189117	294540	1.49427e+06	256321			67209	130118		68737.8	47132.6				2.33593e+06		203205		121416	335747		163301	63491.5	708826	601791	1.29245e+06	417655	80677.6	281278	216005	333973	395827	260249	8.06669e+06	1.43157e+06
	High	[R].HDAHLNGK.[V]		1	8	P04114	P04114 [3021-3028]		0	891.443	0	0.682104	0.556473	0.878215		4.77445e+06	1.34493e+07	4.92198e+06	1.16053e+07	1.34167e+06	165625	257167		56644.2		40048.4									4.5383e+06	6.49343e+06					1.65528e+06			586016
	High	[K].VIGTLK.[N]		1	72	P04114	P04114 [3029-3034]		0	630.418	4	0.987624	0.934014	0.0190525	6.55522e+06	3.50362e+06	2.53864e+07	3.6375e+06	1.00269e+07	2.23882e+06	2.86322e+06	1.65419e+06	1.20556e+06	2.85686e+06	1.24418e+07	1.33561e+06	2.69317e+06	1.72711e+07	1.52191e+07	2.30539e+06	4.38907e+06	1.9528e+06	1.19645e+06	732273	1.06737e+07	1.00793e+07	9.77732e+06	2.61855e+06	2.27065e+06	2.83982e+06	3.09318e+06	3.00576e+06	5.50361e+06	2.13922e+07	1.14901e+06	1.94498e+08	8.99094e+07	1.59167e+07	5.23711e+08
	High	[R].LTGK.[I]		1	7	P04114	P04114 [3064-3067]		0	418.266	2	0.975062	0.620558	0.926205	2.71752e+07	2.93601e+07	2.6113e+07	1.6946e+07	3.21143e+07	2.1136e+07	8.67424e+06	8.26878e+06	5.27272e+06	6.93218e+06	6.50318e+06	8.2208e+06	1.43444e+07	2.24739e+07	2.01631e+07	7.12086e+06	1.22886e+07	1.20831e+07	8.16042e+06	9.73872e+06	1.4821e+07	1.54207e+07	1.25393e+07	1.01683e+07	9.2129e+06	1.86866e+07	3.96732e+06	8.93123e+06	8.36055e+06	1.01935e+07	8.13929e+06	8.10238e+06	1.06596e+07		2.30774e+07
	High	[K].INSR.[F]		1	30	P04114	P04114 [294-297]		0	489.278	1	0.961027	0.76993	0.941928	189970	248436	270381	148122		334139	60162.6	51627.9	46032.6	62527.8	7042.06		646349	1.15105e+06		26928.3		8075.01	79583.5	34677.1		127536		379559		83067.2	11226		38559.7	41086.6	31162.6			2.06803e+06
	High	[K].LNELSFK.[T]		1	32	P04114	P04114 [2404-2410]		0	850.467	6	0.0149879	0.665688	0.798431	3.62115e+07	6.33633e+07	1.18156e+08	3.76259e+07	1.31245e+08	2.664e+07	2.531e+07	2.36996e+07	8.61878e+06	1.967e+07	1.52334e+07	2.97637e+07	2.3132e+08	6.41968e+08	4.22033e+08	7.2615e+07	8.54453e+07	1.29574e+07	1.18828e+08	1.51705e+07	7.06075e+07	1.09775e+08	3.36873e+07	4.84656e+07	4.66012e+07	2.10741e+08	3.02324e+07	2.92896e+07	2.72402e+07	3.54635e+07	4.49513e+07	1.63308e+08	5.91756e+07	4.09825e+07	5.33828e+08
	High	[K].TLQELK.[K]		1	117	P04114	P04114 [328-333]		0	731.43	13	0.121488	0.548163	0.153655	3.56138e+07	8.08616e+07	3.54098e+08	1.36416e+07	2.03545e+07	3.79423e+07	2.72726e+07	1.88245e+07	1.02454e+07	1.19271e+07	2.13165e+07	4.30053e+07	9.60065e+07	3.22885e+08	2.43685e+08	5.80019e+07	3.48485e+07	3.09186e+07	9.80609e+07	3.3937e+07	3.7176e+07	5.10015e+07	2.91596e+07	3.16343e+07	4.2499e+07	1.12136e+08	2.95925e+07	3.83826e+07	2.24566e+07	3.05147e+07	4.89755e+07	1.05182e+08	3.81652e+07	9.27413e+07	3.81749e+08
	High	[K].QNALLRSEYQADYESLR.[F]		1	1	P04114	P04114 [1594-1610]		1	2056.01	0
	High	[HK].IPSR.[EF]		1	101	P04114	P04114 [1330-1333]; [2641-2644]		0	472.288	12	0.864216	0.787725	0.855162	6.81629e+06	5.60295e+06	4.51789e+06	2.07619e+06	1.42918e+07	3.30587e+06	2.0689e+06	3.15922e+06	2.08655e+06	2.83431e+06	590660	4.65332e+08	2.84124e+06	1.14004e+07	1.09978e+09	3.36212e+08	3.53019e+06	1.32563e+06	2.41304e+06	1.60571e+08	2.54304e+06	4.9275e+06	2.44961e+06	2.73425e+06	2.30395e+06	3.12769e+06	2.09143e+06	163409	864308	1.26494e+06	1.75627e+06	3.57039e+06	2.16002e+06	1.24317e+08	1.17257e+07
	High	[R].IQIQEK.[L]		1	231	P04114	P04114 [2260-2265]		0	758.441	11	0.0245828	0.167464	0.163884	1.44867e+07	2.34231e+07	2.68053e+08	1.35961e+07	1.82659e+07	4.52244e+07	1.9973e+08	1.54043e+08	7.40267e+07	9.04366e+07	1.61657e+08	1.44758e+08	4.00331e+08	9.12694e+07	2.59809e+07	3.20768e+08	2.10155e+08	1.58426e+08	3.79481e+08	1.38581e+08	2.49017e+08	2.91601e+08	1.96952e+08	1.5806e+08	1.78517e+08	1.54186e+08	1.69991e+08	2.29916e+08	1.14588e+08	1.69984e+08	2.83927e+08	3.8584e+08	4.21187e+08	1.24113e+09	1.6551e+07
	High	[R].MYQMDIQQELQR.[Y]		1	2	P04114	P04114 [2523-2534]		0	1582.74	0	4.74369e-17	4.58126e-17	3.66332e-17	56941.6	73017.2	243731			134734
	High	[K].QNALLR.[S]		1	90	P04114	P04114 [1594-1599]		0	714.426	1	0.877715	0.546176	0.938953	4.04111e+07	2.80712e+07	3.88839e+07	2.75622e+07	1.00134e+08	3.28397e+07	1.5797e+07	1.17331e+07	9.46017e+06	1.06795e+07	1.71758e+07	1.41105e+07	5.1507e+07	9.8785e+07	4.67119e+07	7.44468e+06	1.15915e+07	1.58983e+07	1.06837e+07	1.25043e+07	2.17877e+07	1.95022e+07	2.34329e+07	1.48124e+07	3.01107e+07	3.37825e+07	7.28633e+06	1.17249e+07	1.96053e+07	9.31778e+06	1.31244e+07	2.82347e+07	1.996e+07	3.80181e+07	4.3323e+07
	High	[K].LIDVISMYR.[E]		1	6	P04114	P04114 [4262-4270]		0	1109.6	0	0.860881	0.0776113	0.195023	222816	314799	157982	146779	499406	105802	129261	11770.2	36874.3	151983	62924		875716	8.47641e+06	1.1476e+06			9863.28	9809.09	53188		93103.9	30731.9		131275	22347.7	258640	6895.4	7243	13321	10496	11621.1	12150.5
	High	[R].TLQGIPQMIGEVIRK.[G]		1	5	P04114	P04114 [805-819]		1	1682.96	1	0.00464519	4.58126e-17	3.66332e-17	2.01087e+06	2.1495e+06	5.31673e+06	4.42926e+06	3.28842e+06	9.18408e+06		75043.3				269707	768617	161130	986648	116397	143738	75485.4			666128
	High	[R].EIQIYKK.[L]		1	87	P04114	P04114 [3767-3773]		1	921.54	3	0.64226	0.757324	0.867243	1.04855e+07	8.99802e+06	3.54942e+07	1.33258e+07	2.17328e+07	4.54793e+06	8.05189e+06	6.57031e+06	2.45135e+06	2.94127e+06	3.40122e+06	5.58202e+06	2.81517e+07	9.38677e+07	4.55949e+07	1.162e+07	8.09089e+06	4.7739e+06	1.37719e+07	2.99956e+06	1.2508e+07	1.86384e+07	2.83845e+06	1.11839e+07	1.17748e+07	3.47809e+07	1.19576e+07	9.55986e+06	5.78411e+06	6.33066e+06	1.23624e+07	3.48886e+07	1.17823e+07	4.12763e+08	9.17376e+07
	High	[R].FNQYK.[Y]		1	11	P04114	P04114 [3093-3097]		0	699.346	0	0.73063	0.208074	0.107743							343288					337574	2.54858e+06	9.36123e+06	872101	603373		863532		479117			363163			3.2844e+06		471716				2.41777e+06	2.46013e+06	1.68244e+07
	High	[K].TGLK.[E]		1	56	P04114	P04114 [3156-3159]		0	418.266	2	0.429741	0.622254	0.777179	5.44369e+06	3.45236e+06	3.58866e+06	435461	1.0805e+06	3.55791e+06	333503	187389		211954			7.73489e+06	1.77583e+07	1.07636e+07				112242		726216	1.40625e+06			2.12919e+06		2.20567e+06					1.39626e+06		1.53858e+08	1.33048e+06
	High	[R].EIQIYK.[K]		1	28	P04114	P04114 [3767-3772]		0	793.445	4	0.0963187	0.908069	0.000782237	4.69849e+07	1.05472e+08	2.74202e+08	1.01874e+08	1.52657e+08	8.54682e+07	4.17795e+07	3.08053e+07	7.76781e+06	1.00211e+07	2.50839e+07	6.39554e+07	2.55085e+08	7.7858e+08	4.89477e+08	1.18287e+08	9.26751e+07	3.4301e+07	9.59349e+07	6.77354e+07	1.09331e+08	1.37221e+08	5.59877e+07	2.90372e+07	5.14136e+07	2.49729e+08	5.83159e+07	5.65357e+07	3.18168e+07	4.68797e+07	6.81977e+07	854029	363894		3.10866e+06
	High	[R].FFGEGTKK.[M]		1	91	P04114	P04114 [298-305]		1	913.478	3	0.00448634	0.0776766	0.55838	529702	615927	6.89867e+06		1.38481e+07		5.60388e+06	4.14978e+06	1.45055e+06	1.99505e+06	1.60532e+06	2.47765e+06	2.58334e+07	9.77433e+07	4.0492e+07	8.84832e+06	1.14582e+07	3.02949e+06	1.63183e+06	1.6139e+06	1.31302e+07	2.43032e+07		1.42668e+07	6.39575e+06	1.56868e+07	1.30525e+07	5.72454e+06	5.07584e+06	4.51296e+06	7.46935e+06	1.43982e+07	6.71386e+06	8.51646e+07	4.58691e+07
	High	[K].YRAALGK.[L]		1	148	P04114	P04114 [2111-2117]		1	778.457	8	0.874469	0.908868	0.163059	5.60621e+07	6.1235e+07	3.954e+08	6.70517e+07	1.51648e+07	3.23988e+07	6.38102e+07	2.50096e+07	2.07366e+07	3.11017e+07	3.91939e+07	3.5474e+07	8.65356e+07	2.96961e+07	1.5463e+07	1.28359e+08	4.90781e+07	3.52099e+07	8.7211e+07	2.4778e+07	4.9436e+07	1.12865e+08	2.68447e+07	5.32801e+07	1.04509e+08	4.39202e+07	4.62564e+07	4.50541e+07	3.93505e+07	3.94204e+07	8.43943e+07	2.48161e+08	9.73863e+07	1.11265e+08	3.02739e+07
	High	[R].DLGQCDR.[F]	1xCarbamidomethyl [C5]	1	26	P04114	P04114 [208-214]		0	863.368	0	4.74369e-17	0.0117007	0.270843			5.65217e+06		2.08181e+06																						336039							3.15481e+06
	High	[K].DLSK.[E]		1	16	P04114	P04114 [4275-4278]		0	462.256	1	0.00264533	4.58126e-17	0.671465						8.36512e+06																	864688											5.96756e+08
	High	[K].GMALFGEGK.[A]		1	9	P04114	P04114 [3006-3014]		0	909.45	0	0.00924182	8.89935e-09	0.979522	4.90222e+06	1.12785e+07	6.71704e+06	2.17193e+07	4.79811e+07	5.36242e+06	2.91014e+06	9.78333e+06	1.03287e+06	3.29705e+06	6.57786e+06	793476			387087	669727		882584	2.1012e+06		67615.2	467706	892728	187090	137784	364642		136122	232067		562896	5.08183e+07	1.07099e+07	645975	1.79353e+08
	High	[K].DDKHEQDMVNGIMLSVEK.[L]	1xOxidation [M8]	1	2	P04114	P04114 [743-760]		1	2103.97	0	4.74369e-17	4.58126e-17	3.66332e-17																				22938					169263
	High	[K].YQIR.[I]		1	3	P04114	P04114 [2256-2259]		0	579.325	0
	High	[K].ESMLK.[T]	1xOxidation [M3]	1	37	P04114	P04114 [670-674]		0	623.307	3	4.74369e-17	4.58126e-17	0.029492			262048																															1.4995e+07
	High	[K].FSLDGK.[A]		1	77	P04114	P04114 [1697-1702]		0	666.346	7	0.959895	0.866587	0.530526	7.20882e+06	528961	8.58743e+06	1.00923e+06	2.85037e+06	3.26573e+06	1.42536e+06	2.49478e+06	1.25807e+06	1.55903e+06	2.28967e+06	563538	4.23738e+06	1.40108e+07	6.92436e+06	1.25112e+06	1.58677e+06	140870	2.34899e+06	2.12194e+06	1.49146e+06	1.21469e+06	4.52989e+06	535469	1.08271e+06	1.93286e+06	5.50961e+06	2.82874e+06	4.30595e+06	1.11621e+06	657427	4.09816e+06	3.23821e+06	5.91322e+07	4.95031e+06
	High	[K].KLVK.[E]		1	2	P04114	P04114 [613-616]		1	487.36	0
	High	[R].FREHNAK.[F]		1	30	P04114	P04114 [1690-1696]		1	901.464	2	0.11099	0.000348664	0.241694	1.5559e+07	3.97826e+07	3.76549e+07	1.34605e+07	8.33661e+06									7.04105e+06	2.8965e+06						4.21466e+06	1.35071e+07	2.19724e+06				1.96745e+06					1.18403e+06	455230	5.50174e+07
	High	[R].VNDESTEGK.[T]		1	1	P04114	P04114 [1079-1087]		0	978.437	0
	High	[K].YTLNK.[N]		1	34	P04114	P04114 [1287-1291]		0	638.351	0	0.169417	0.0555653	0.0959513		1.19412e+07	1.29266e+07		2.02979e+07	3.67793e+06	1.64677e+06	1.94215e+06	1.25639e+06	8.06787e+06	703376	6229.43				522167		690167	6.01153e+06	538118	3.07062e+06	1.28836e+06	667156	469433	864462		1.43983e+07	675610	618802	1.61799e+06	358185	351735	426256	1.31213e+07
	High	[R].VNLVK.[T]		1	99	P04114	P04114 [2220-2224]		0	572.377	4	0.763582	0.95197	0.81663	2.15393e+06	1.91393e+06	2.08709e+06	1.39614e+06	9.18317e+06	1.06907e+06	1.47567e+06	1.59618e+06	799582	1.28136e+06	1.44622e+06	792546	1.78699e+06	3.81283e+06	2.26429e+06	285936	197055	266451	445567	1.24398e+06	490237		759878	1.35719e+06	1.97288e+06	2.37385e+06	2.72767e+06	1.19928e+06	4942.65	979777	1.20023e+06	1.44831e+06	1.3533e+06		2.80881e+07
	High	[K].NIFNFK.[V]		1	38	P04114	P04114 [1725-1730]		0	782.42	5	0.894825	0.941841	0.86549	3.94067e+06	2.25509e+06	4.11584e+06	4.07566e+06	1.33886e+07	4.66083e+06	1.11106e+06	1.30478e+06	637845	969259	1.05492e+06	238723	4.26337e+06	2.39049e+07	4.10052e+06	246839	611986	114406	1.84347e+06	1.38027e+07	1.32319e+06	118632	1.74406e+07	2.57855e+06	1.89106e+06	3.3399e+06	775949	1.7212e+06	1.47232e+06	1.0298e+06	1.91479e+06	2.36112e+06	3.02991e+06	470241	3.90953e+06
	High	[K].SSILK.[C]		1	102	P04114	P04114 [508-512]		0	547.345	9	0.000185828	0.704969	0.441297	2.92448e+07	4.24008e+07	4.76554e+07	4.24212e+07	2.84606e+07	3.52409e+07	9.12089e+06	1.32981e+07	1.0882e+07	2.05887e+07	8.54449e+06	3.8417e+06	8.97108e+06	3.16451e+07	1.2473e+07	1.99516e+06	6.96964e+06	2.94264e+06	2.43204e+06	1.61774e+06	3.20742e+06	3.1502e+06	2.51092e+06	1.9128e+07	1.46122e+07	1.90732e+07	7.15611e+06	1.50172e+07	3.68482e+07	1.77579e+07	1.69768e+07	2.30289e+06	2.59492e+06	3.66027e+06	2.44458e+07
	High	[K].IDGQFR.[V]		1	21	P04114	P04114 [1486-1491]		0	735.378	2	0.356477	0.235604	0.863865	3.66428e+06	1.15187e+07	4.02834e+07	2.40078e+06	7.29833e+06	1.43946e+07	1.60197e+07	1.32663e+07	6.03586e+06	9.97818e+06	1.17634e+07	1.17162e+07	4.23369e+07	5.48793e+06	4.42081e+06	2.40526e+07	1.68908e+07	1.99345e+07	5.1917e+07	1.40927e+07	1.94883e+07	2.87016e+07	1.1037e+07	3.31868e+07	2.61091e+07	3.78557e+07	1.25776e+07	2.3548e+07	2.03411e+07	2.51323e+07	3.50249e+07	6.44673e+07	2.50034e+07	1.59031e+07	5.5537e+06
	High	[R].EIFNMAR.[D]	1xOxidation [M5]	1	113	P04114	P04114 [428-434]		0	896.429	8	0.969962	0.999895	0.938429	1.25675e+07	1.20303e+07	1.70505e+07	9.39716e+06	2.08147e+07	1.16715e+07	5.5784e+06	6.15088e+06	4.33527e+06	4.47689e+06	4.30651e+06	3.94668e+06	9.30597e+06	2.51883e+07	2.10971e+07	8.92725e+06	6.8946e+06	5.33764e+06	8.79042e+06	8.10591e+06	9.4297e+06	1.56721e+07	3.82457e+06	1.01516e+07	8.39463e+06	2.26188e+07	1.36079e+07	9.46352e+06	7.61409e+06	8.44147e+06	6.25078e+06	1.33892e+07	1.06427e+07	2.74831e+07	4.24339e+07
	High	[K].FSHVEK.[L]		1	8	P04114	P04114 [1437-1442]		0	746.383	0	4.74369e-17	4.58126e-17	3.66332e-17																5.60248e+06	1.10644e+07	2.9412e+07		1.86711e+07	2.76923e+07	4.92367e+07	2.10436e+07	2.56118e+07	2.3553e+07			2.03279e+07	1.00162e+07	1.79106e+07	1.31975e+07		2.23358e+07
	High	[R].LEPLK.[L]		1	11	P04114	P04114 [1816-1820]		0	599.376	3	0.888847	3.53955e-05	0.149449	3.28021e+06	1.99884e+06	2.35231e+06	1.98343e+06		1.71697e+06	851212	554032	716272	937832		679391	2.42055e+06	4.0466e+06				1.2339e+06	2.00379e+06	1.05056e+06	1.03696e+06	1.21108e+06	1.02121e+06	28298.7		49488.9		50364.1	23356.4	87286.2	53096.5	404282	11851.3	1.6658e+06	2.18214e+06
	High	[R].LTRK.[R]		1	7	P04114	P04114 [3387-3390]		1	517.346	1	0.829192	0.941841	0.968053						25145.6														13893.3		15890.1				15971.1					23422.2	18898.8	31789.7	4.05507e+07
	High	[K].HLRK.[Y]		1	2	P04114	P04114 [48-51]		1	553.357	0	0.87409	0.0852091	0.227832					426589								152630	1.46047e+06	451754		60297.7							258008		75860.8	40345.9	56256.4	98149.1		55526.8	193151	96084.1
	High	[K].AAIQALR.[K]		1	4	P04114	P04114 [526-532]		0	742.457	0	0.832489	0.751027	0.893724				698280	614464		606723	422611		317743	333785	221901	1.85105e+06		607806		150473				338446	238294			286972		287483	361167	369099	230710		254321			620816
	High	[K].LTTNGRFREHNAK.[F]		1	9	P04114	P04114 [1684-1696]		2	1543.81	0	4.74369e-17		3.66332e-17													553581	3.20903e+06						732618	1.18233e+06	1.45953e+06										670163	456179	4.54793e+07
	High	[K].INFNEK.[L]		1	304	P04114	P04114 [2165-2170]		0	764.394	18	0.368553	0.896455	0.679947	2.07255e+08	2.99271e+08	1.43622e+09	3.28727e+08	1.6153e+08	2.48362e+08	1.47517e+08	1.20661e+08	6.39287e+07	7.96301e+07	8.40656e+07	1.59925e+08	4.11515e+08	1.68551e+09	7.76133e+08	3.81784e+08	1.56489e+08	1.40651e+08	3.74067e+08	1.61266e+08	2.62202e+08	2.51424e+08	8.36616e+07	1.86411e+08	1.61608e+08	5.88313e+08	1.92763e+08	1.69571e+08	1.32227e+08	1.90694e+08	3.5644e+08	3.90148e+08	2.53236e+08	3.02687e+08	1.29761e+09
	High	[K].LEGTTRLTR.[K]		1	9	P04114	P04114 [3381-3389]		1	1046.6	1	0.914003	4.58126e-17	0.828042								2.37506e+06						3.84008e+06	6.7324e+06	420145	2.43826e+06																		1.7033e+06
	High	[K].LQQLK.[R]		1	5	P04114	P04114 [2266-2270]		0	629.398	0	4.74369e-17	0.961926	0.771332								753439																			1.01414e+06	386500
	High	[K].LNIPK.[L]		1	100	P04114	P04114 [2893-2897]		0	584.377	15	0.289112	0.032438	0.516859	1.17497e+06	1.28096e+06	6.47594e+06	2.59807e+06	6.25585e+06	4.80137e+06	655818	372398	211313	577518	1.26998e+06	284346	3.02245e+07	6.53062e+06		181725	426588		1.04268e+06	51256.4	19393	10565.3	1.36341e+06	519585	10509.9	958414	332848	85156.9	95597.3	111256	725866	810982	612965	1.71749e+08	1.66136e+06
	High	[K].ESMLK.[T]		1	11	P04114	P04114 [670-674]		0	607.312	2	4.74369e-17	4.58126e-17	0.902892								1.00494e+06																									1.31253e+06
	High	[K].RPVK.[L]		1	3	P04114	P04114 [931-934]		0	499.335	0			3.66332e-17
	High	[K].VLADK.[F]		1	10	P04114	P04114 [3725-3729]		0	545.329	1	0.93412	0.835708	0.892763		1.53341e+07	3.99967e+06				1.09678e+06	932819	1.09428e+06	313575	334655					666841	906120			687599	1.5941e+06			379860			364807		635381	1.61616e+06	901408		1.01864e+06
	High	[K].LVTELR.[G]		1	29	P04114	P04114 [351-356]		0	730.446	4	0.787735	0.815134	0.0105122	1.75063e+07	2.2627e+07	6.66844e+07	2.05887e+07	3.97548e+07	1.66845e+07	1.92123e+07	1.36629e+07	7.95328e+06	1.2429e+07	9.56719e+06	1.18347e+07	4.87206e+07	1.87412e+08	9.85986e+07	1.82395e+07	2.01431e+07	1.61207e+07	5.16052e+07	1.41219e+07	1.77982e+07	2.7193e+07	1.08715e+07	2.17687e+07	2.00596e+07	5.02127e+07	1.52817e+07	2.78787e+07	1.36343e+07	2.16041e+07	2.7359e+07	1.66452e+06	1.88369e+06	3.02479e+07	2.53171e+06
	High	[K].INAFR.[A]		1	55	P04114	P04114 [2334-2338]		0	620.351	2	0.87189	0.262967	0.00204327	4.25825e+06	116962			2.42998e+06			339150		746179	401210	617494	3.11126e+06	2.61749e+06	5.43434e+06	425561	1.64465e+06		886909		430308	678582			2.53867e+06		428579	2.41753e+06	1.35555e+06			6.84809e+07	3.21921e+07	6.08869e+06	8.92368e+07
	High	[K].LEDTPK.[I]		1	2	P04114	P04114 [288-293]		0	702.367	0	4.74369e-17	0.867494	0.526315	967843							1.10821e+06	500858																623544							2.1801e+06
	High	[K].SQAIATKK.[I]		1	14	P04114	P04114 [4479-4486]		1	846.504	2	4.74369e-17	4.58126e-17	2.63915e-07											7590.35																					1.80681e+06	1.04652e+06	2.06764e+07	1.39586e+06
	High	[R].LQAEAR.[S]		1	2	P04114	P04114 [1129-1134]		0	687.378	0	0.838432	0.999895	0.693501			3.79004e+06				1.63958e+06	734564	750363	920529	1.07742e+06							1.27741e+06		1.86466e+06		2.95404e+06	1.63238e+06		756723		1.07568e+06		991828
	High	[R].EDRALVDTLK.[F]		1	3	P04114	P04114 [1025-1034]		1	1159.63	0	0.0101496	0.00800503	0.0329364				229659		870186			8783.15	58825.3	80479	2.07221e+06		7.97915e+06		221777	1.69899e+06			335349			624011	541038		2.99627e+06		684216	396261	1.61164e+06	753947		1.10511e+07	6.45312e+06
	High	[R].MNFK.[Q]		1	16	P04114	P04114 [3438-3441]		0	539.265	2	4.74369e-17		3.66332e-17															568004					571060		342190	512437									1.59959e+06		1.43406e+07
	High	[K].LTTNGRFR.[E]		1	4	P04114	P04114 [1684-1691]		1	964.532	1	0.319216	4.58126e-17	0.939035			1.27587e+06											4.02091e+06
	High	[K].LLLMGAR.[T]	1xOxidation [M4]	1	44	P04114	P04114 [798-804]		0	789.465	3	0.166283	0.507166	0.916264	5.78766e+07	7.45223e+07	3.21516e+08	6.68479e+07	9.21677e+07	7.0719e+07	3.97763e+07	4.41882e+07	1.7048e+07	2.95496e+07	2.54186e+07	8.90566e+07	1.49768e+08	3.40952e+08	3.74984e+08	1.06756e+08	4.70284e+07	4.70983e+07	2.45145e+08	5.09815e+07	1.40254e+08	1.19323e+08	4.94289e+07	8.41491e+07	4.19741e+07	3.14669e+08	5.8616e+07	1.40074e+08	4.01342e+07	1.24471e+08	1.11102e+08	1.09093e+08	7.72389e+07	2.91678e+06	2.57822e+08
	High	[R].ETLEDTR.[D]		1	4	P04114	P04114 [2514-2520]		0	863.41	0
	High	[K].WACPR.[F]	1xCarbamidomethyl [C3]	1	12	P04114	P04114 [2931-2935]		0	689.319	0	0.86668	0.908998	0.852251	1.05751e+06	497746	1.22073e+06	301096		1.59359e+06	556316			273823	964323	744014					1.03846e+06	956696	631861	1.1149e+06	5.03929e+06	1.11494e+06	1.34409e+06	970100		915804	2.084e+07	538269	1.08031e+06	739792	715133
	High	[K].QELNGNTK.[S]		1	2	P04114	P04114 [3442-3449]		0	903.453	1	4.74369e-17	0.000731223	0.837924	538428	338067	801892																											25996.7	44682.1			1.3876e+08
	High	[K].NTASLK.[Y]		1	3	P04114	P04114 [1557-1562]		0	633.357	0			3.66332e-17
	High	[K].INAFRAK.[V]		1	4	P04114	P04114 [2334-2340]		1	819.484	0	0.738734	0.688262	0.246694	931849	423043		1.26817e+06			434696		240667		186204	397736	1.99619e+06	9.62756e+06	6.01849e+06	943071		475494	855743		898021	1.29748e+06			875336	1.77137e+06	666063			339204		2.15288e+06	859898		6.14725e+06
	High	[R].TEHGSEMLFFGNAIEGK.[S]		1	2	P04114	P04114 [2837-2853]		0	1866.87	0
	High	[K].FIAESKR.[L]		1	8	P04114	P04114 [4513-4519]		1	850.478	0
	High	[K].MLETVR.[T]		1	4	P04114	P04114 [1312-1317]		0	748.402	0
	High	[K].STRSSVK.[L]		1	3	P04114	P04114 [3525-3531]		1	764.426	1			3.66332e-17
	High	[K].LIVAMSSWLQK.[A]		1	8	P04114	P04114 [1230-1240]		0	1275.71	3	0.216185	0.403358	0.669001	438111	2.09041e+06	2.6675e+06	281550	717579	398715			5190.19	8866.12	111198		61852.6	143683	63053.5		10650.7							192311	77340.1	194129			101074			28064.6	210821	1.45457e+06	191878
	High	[R].ARYHMK.[A]	1xOxidation [M5]	1	13	P04114	P04114 [1387-1392]		1	821.409	0	0.716837	0.341914	0.861491	54381.8	157668	733571	74273.5	173480	31615.1							19215.8	201638	31965.7	12197.7	19515.4	28333.6		43955.1	82991.7	350384	101204				92765.7	17976	9129.8				23514.5	305911	24053
	High	[K].VRFPLR.[L]		1	3	P04114	P04114 [3058-3063]		1	787.494	0			3.66332e-17																																7.11911e+06	2.86804e+06	7.31485e+07	5.02235e+07
	High	[R].YHMK.[A]	1xOxidation [M3]	1	6	P04114	P04114 [1389-1392]		0	594.27	0	0.000591763	1.87737e-05	0.00133171			1.89713e+06									32758.2	93994.8	210911	152995	75011	45718.8	69102.1	107892	66858.6	65931.3	170586	117401	32152.4	81187.3	107484	12624	53368.5	42746.9	74620.9	98884.3	136981	103975		227518
	High	[R].RNLQNNAEWVYQGAIR.[Q]		1	2	P04114	P04114 [4106-4121]		1	1931.98	0			3.66332e-17																																		4.43378e+06
	High	[K].TSYRLTLDIQNK.[K]		1	3	P04114	P04114 [1088-1099]		1	1451.79	0	0.0935052	0.731858	0.690049			653490		1.72884e+06		225879	105423					1.29833e+06	1.21238e+07	4.75593e+06						172370					492533	215147				210045	969098			4.70482e+06
	High	[K].EVPEAR.[A]		1	1	P04114	P04114 [769-774]		0	700.362	0	4.74369e-17	4.58126e-17	0.0827082			3.20886e+06
	High	[K].GSVLSR.[E]		1	4	P04114	P04114 [3502-3507]		0	618.357	0
	High	[K].LQQLKR.[H]		1	2	P04114	P04114 [2266-2271]		1	785.499	0	4.74369e-17		3.66332e-17																						987406
	High	[K].AEALK.[L]		1	1	P04114	P04114 [2463-2467]		0	531.314	0	0.0924701	4.58126e-17	0.802148								292312					3.33167e+06			1.00162e+06
	High	[R].YHMK.[A]		1	2	P04114	P04114 [1389-1392]		0	578.276	0	4.74369e-17	4.58126e-17	0.147693			48083.4																													863370
	High	[R].LLDHR.[V]		1	1	P04114	P04114 [1211-1215]		0	653.373	0
	High	[K].ATLRIGQDGISTSATTNLK.[C]		1	2	P04114	P04114 [1643-1661]		1	1947.05	0
	High	[R].SSVK.[L]		1	3	P04114	P04114 [3528-3531]		0	420.245	1	0.946538	0.912995	0.947354				692824	1.56786e+06	788199	1.43006e+06	1.8665e+06	933909	821432		417384	2.59387e+06		2.40558e+06	443751	1.66351e+06				824014			1.3194e+06	1.17938e+06	2.25678e+06	700835	465562	1.04251e+06	3.33998e+06	2.30225e+06	2.30533e+06	1.79267e+06
	High	[K].YFHK.[L]		1	4	P04114	P04114 [2889-2892]		0	594.303	0	0.00153176	4.58126e-17	0.00021639	202423							96991.8		49756.2	97921	59973.1	590976	6.35146e+06	3.4858e+06	1.65587e+06	1.76854e+06	154484	1.05409e+06	2.08839e+06	1.9808e+06	1.67543e+06	3.25125e+06									399681	279794		2.98462e+06
	High	[R].FQFPGK.[P]		1	2	P04114	P04114 [4202-4207]		0	723.382	0	4.74369e-17	4.58126e-17	3.66332e-17															1.24208e+06				35388.7						363352	833932					353092	983954			3.82787e+06
	High	[K].GTFAHR.[D]		1	1	P04114	P04114 [3947-3952]		0	688.353	0			3.66332e-17
	High	[K].GAVDHK.[L]		1	1	P04114	P04114 [3475-3480]		0	626.326	0
	High	[K].LDFREIQIYK.[K]		1	1	P04114	P04114 [3763-3772]		1	1324.73	0
	High	[K].GSWK.[W]		1	2	P04114	P04114 [2927-2930]		0	477.246	0			3.66332e-17
	High	[K].NSEEFAAAMSRYELK.[L]	1xOxidation [M9]	1	2	P04114	P04114 [118-132]		1	1761.81	0
	High	[K].TSYR.[L]		1	4	P04114	P04114 [1088-1091]		0	526.262	1	0.494298	0.919447	0.575475	1.38305e+07	4.05248e+07	4.30677e+07	1.08541e+07	1.72277e+07	1.06121e+08	5.11101e+07	3.87816e+07	2.70429e+07	3.85261e+07	3.82508e+07	4.24021e+07	7.10596e+07	1.43239e+08	6.76025e+07	2.53202e+07	4.87467e+07	6.39475e+07	3.55497e+07	4.54164e+07	6.21417e+07	6.87525e+07	4.97404e+07	4.7674e+07	4.53923e+07	6.75462e+07	3.04041e+07	3.34903e+07	4.5642e+07	4.00079e+07	4.34644e+07	4.80201e+07	4.6541e+07	1.28426e+06	5.11577e+07
	High	[KY].INSK.[HS]		1	1	P04114	P04114 [2963-2966]; [3521-3524]		0	461.272	0			3.66332e-17
	High	[DK].FSSK.[LY]		1	1	P04114	P04114 [1766-1769]; [2830-2833]		0	468.245	0
	High	[K].LEGTTRLTRK.[R]		1	2	P04114	P04114 [3381-3390]		2	1174.69	0
	High	[K].SLWDFLK.[L]		1	1	P04114	P04114 [3683-3689]		0	908.488	0
	High	[K].INSGAHKATLR.[I]		1	2	P04114	P04114 [1636-1646]		1	1167.66	0
	High	[K].SDGR.[V]		1	1	P04114	P04114 [1281-1284]		0	434.199	0
	High	[K].AQYK.[K]		1	2	P04114	P04114 [3175-3178]		0	509.272	0	4.74369e-17		3.66332e-17													38118.3		91809.2		678519		627822			174745
	High	[K].GTYGLSCQRDPNTGRLNGESNLR.[F]	1xCarbamidomethyl [C7]	1	1	P04114	P04114 [1499-1521]		2	2565.22	0	0.798954	0.405267	0.566895			676273					726582				221073	887487		650422	321949			406398							315103					191344
	High	[R].KGSK.[N]		1	5	P04114	P04114 [819-822]		1	419.261	0	0.0318875	4.58126e-17	0.185196				289640										4.69104e+07									144437											1.26965e+07
	High	[R].MNFK.[Q]	1xOxidation [M1]	1	3	P04114	P04114 [3438-3441]		0	555.26	0	4.74369e-17	0.00652366	0.0741554	412877		1.96865e+06		6.12374e+06		1.28842e+06	2.42775e+06	302253	690711	412063													115983	106249	369446		104547	95116.9	60098.8	92596.7	192412
	High	[K].LKETIQK.[L]		1	1	P04114	P04114 [2370-2376]		1	859.525	0
	High	[K].TKNSEEFAAAMSR.[Y]		1	2	P04114	P04114 [116-128]		1	1441.67	0	0.277084	0.467327	3.66332e-17			698520		1.03463e+06		328198						995441	3.68299e+06	2.55991e+06										222582	906323	155640				319553
	High	[K].GMTR.[P]	1xOxidation [M2]	1	1	P04114	P04114 [230-233]		0	480.223	0	4.74369e-17	4.58126e-17	0.592762					1.9097e+06
	High	[K].AASGTTGTYQEWKDK.[A]		1	1	P04114	P04114 [4133-4147]		1	1642.77	0			3.66332e-17
	High	[K].GISTSAASPAVGTVGMDMDEDDDFSK.[W]	2xOxidation [M16; M18]	1	143	P04114	P04114 [3996-4021]		0	2635.1	2	0.0145577	0.0335841	0.52237	883799	1.73036e+06	7.72881e+06	1.71351e+06	1.93933e+06	1.46178e+06	5.04253e+06	3.91768e+06	1.31957e+06	2.81503e+06	1.68046e+06	3.12243e+06	1.15847e+07	2.00117e+07	3.93233e+07	1.32381e+07	5.35039e+06	3.8271e+06	7.74321e+06	2.62555e+06	8.58013e+06	1.14482e+07	2.16864e+06	7.58232e+06	5.86536e+06	3.93111e+07	1.29206e+06	1.28999e+07	3.9849e+06	6.79325e+06	1.15494e+07	2.35237e+07	7.79681e+06	2.21876e+07	9.00875e+07
	High	[K].HEQDMVNGIMLSVEK.[L]	2xOxidation [M5; M10]	1	57	P04114	P04114 [746-760]		0	1761.81	2	0.65582	0.029164	0.878215	348362	47737.6	3.3557e+06	22048.5	1.69057e+06	4573.08	6.12155e+06	4.44291e+06	463277	1.19956e+06	91023.9	62701.2	1.63406e+07	4.07825e+07	3.62308e+07	106118	132676	166279	169375	109346	5152.55	222816	728659	2.09538e+06	6.16872e+06	1.54234e+07	5.50932e+06	1.35513e+06	2.45037e+06	3.65744e+06	3.23871e+06	1.07006e+07	3.83546e+06	4.20153e+07	6.35645e+07
	High	[R].SVMAPFTMTIDAHTNGNGK.[L]	2xOxidation [M3; M8]	1	27	P04114	P04114 [1898-1916]		0	2023.92	0	0.926876	0.448057	0.488463	294943		3.43773e+06	621660			2.54127e+06	2.31728e+06	647440	1.21114e+06	712825	700286		1.2249e+07	1.18393e+07	1.15209e+06	2.44217e+06	184843	3.06545e+06	412809	1.14712e+06	1.36436e+06		2.47566e+06		5.14398e+06		1.64785e+06	1.23986e+06	2.74121e+06	4.39514e+06		4.38089e+06		871448
	High	[R].VIGNMGQTMEQLTPELK.[S]	2xOxidation [M5; M9]	1	171	P04114	P04114 [491-507]		0	1920.94	10	0.0890737	0.832245	0.7681	3.646e+06	6.61837e+06	2.02766e+07	7.47131e+06	2.63914e+06	6.43066e+06	8.7975e+06	7.74179e+06	3.72783e+06	6.15173e+06	2.81592e+06	1.09242e+07	1.05231e+07	2.6759e+07	5.34733e+07	1.79675e+07	1.55059e+07	6.38657e+06	2.95091e+07	1.57044e+07	1.41646e+07	1.52259e+07	8.06104e+06	7.38608e+06	5.70872e+06	2.29238e+07	2.65334e+06	1.07315e+07	4.56614e+06	9.75086e+06	1.26014e+07	2.65455e+07	1.79461e+07		5.68702e+07
	High	[K].LSNDMMGSYAEMK.[F]	3xOxidation [M5; M6; M12]	1	342	P04114	P04114 [1738-1750]		0	1524.6	11	0.579089	0.890724	0.370058	5.77231e+07	4.0995e+07	1.02935e+08	2.15849e+07	3.13384e+07	1.70907e+07	1.90899e+07	1.29116e+07	1.05446e+07	1.25667e+07	1.01382e+07	6.18629e+07	1.77375e+07	6.89925e+07	2.97217e+07	3.56741e+07	1.95628e+07	1.47472e+07	2.39102e+07	3.10456e+07	2.6073e+07	1.34035e+07	8.96153e+06	7.36048e+06	1.7353e+07	3.26462e+07	3.34924e+07	2.07917e+07	1.19212e+07	2.22437e+07	2.27381e+07	3.67006e+07	2.08845e+07	1.46489e+08	3.37565e+07
	High	[K].LSNDMMGSYAEMK.[F]	2xOxidation [M6; M]	1	264	P04114	P04114 [1738-1750]		0	1508.61	15	0.436164	0.846203	0.933525	1.48953e+07	1.88172e+07	6.14922e+07	1.67387e+07	1.95498e+07	1.3847e+07	1.31891e+07	1.00803e+07	5.10601e+06	7.47265e+06	8.4884e+06	1.34992e+07	3.01126e+07	8.21521e+07	6.45685e+07	2.03493e+07	1.70591e+07	1.79792e+07	2.65122e+07	1.72054e+07	2.06011e+07	2.80457e+07	1.35064e+07	1.75279e+07	1.65994e+07	5.23071e+07	1.2855e+07	3.02646e+07	1.21419e+07	1.57317e+07	2.41319e+07	2.82498e+07	2.0393e+07	8.62991e+07	8.28481e+07
	High	[K].DDKHEQDMVNGIMLSVEK.[L]	2xOxidation [M8; M13]	1	4	P04114	P04114 [743-760]		1	2119.96	0	0.0956494	0.813687	0.891682	816059	463789	575179	488094	1.56302e+06	722417	514952	1.15852e+06	589522	660160			3.20311e+06	1.19666e+07	4.58275e+06					197746				695955	212353	1.14332e+06	961141			1.35241e+06		491796		1.12959e+07	2.26166e+06
	High	[R].MYQMDIQQELQR.[Y]	2xOxidation [M1; M4]	1	25	P04114	P04114 [2523-2534]		0	1614.73	1	0.550497	0.925399	0.661511			609615				313928	378913	102427	142295	398065	702160	575898	1.33303e+06	4.01809e+06	1.82279e+06	822954	335862	2.02332e+06	289331	1.25032e+06	2.04422e+06	521136	1.01707e+06	334288	2.17381e+06	314720	335940	247155	569803	611214	1.47681e+06	570968		4.03504e+06
	High	[K].KLQSTTVMNPYMK.[L]	2xOxidation [M8; M12]	1	18	P04114	P04114 [4541-4553]		1	1572.78	1	0.946538	0.934014	0.824291			1.24606e+06				809171	569732		790600		429257			3.31254e+06	926658	668092		469527		915224	335206		857256	855455	1.98054e+06	834738	964779	799555	955994	1.70077e+06	2.67606e+06	750568		4.16055e+06
	High	[K].LQSTTVMNPYMK.[L]	2xOxidation [M7; M11]	1	112	P04114	P04114 [4542-4553]		0	1444.68	3	0.396453	0.700448	0.805007	6.93893e+06	6.78423e+06	2.01834e+07	3.90155e+06	6.51377e+06	5.50679e+06	6.05896e+06	4.67867e+06	3.59839e+06	5.3541e+06	4.64723e+06	1.03495e+07	7.32917e+06	1.07103e+07	1.28159e+07	1.43942e+07	7.42687e+06	4.4379e+06	1.71442e+07	6.02209e+06	1.06932e+07	1.04931e+07	6.41915e+06	5.45819e+06	5.69186e+06	1.53991e+07	7.75035e+06	1.08035e+07	7.11219e+06	9.02866e+06	1.25052e+07	1.67701e+07	9.84407e+06	2.62705e+07	2.58225e+07
	High	[K].MDMTFSK.[Q]	2xOxidation [M1; M3]	1	126	P04114	P04114 [1587-1593]		0	891.359	12	0.332217	0.889689	0.847119	1.04683e+07	1.12467e+07	1.58988e+07	8.32364e+06	1.62086e+07	1.35972e+07	1.06681e+07	6.48072e+06	4.29629e+06	4.83471e+06	8.37688e+06	1.45334e+07	2.93858e+07	1.00683e+08	5.54261e+07	2.45761e+07	1.00633e+07	1.14806e+07	2.04703e+07	1.12918e+07	1.41852e+07	2.3143e+07	8.41364e+06	8.15175e+06	1.30223e+07	3.37383e+07	8.72468e+06	9.98792e+06	1.22441e+07	1.25216e+07	2.56894e+07	3.02214e+07	1.8365e+07	1.11554e+08	4.45152e+07
	High	[R].LAAYLMLMR.[S]	2xOxidation [M6; M8]	1	1	P04114	P04114 [559-567]		0	1113.58	0	0.768309	0.999895	0.475061							32978.2						827130	1.53357e+06	1.63625e+06	119767			75536	60175.5	22033.5							9791.36			122859	202669
P02768-1	ALB	Serum albumin [OS=Homo sapiens]	n/a	High		0	80	71362	80	609	69.3	6.28	37139.9	cell communication;cell organization and biogenesis;metabolic process;regulation of biological process;response to stimulus;transport	cytoplasm;endoplasmic reticulum;extracellular;Golgi;nucleus;organelle lumen	antioxidant activity;catalytic activity;DNA binding;metal ion binding;protein binding	Pf00273	213	4	ENSG00000163631.16	Thyroid hormone synthesis	Post-translational protein phosphorylation; Regulation of Insulin-like Growth Factor (IGF) transport and uptake by Insulin-like Growth Factor Binding Proteins (IGFBPs); Scavenging of heme from plasma; Platelet degranulation ; Defective SLCO1B1 causes hyperbilirubinemia, Rotor type (HBLRR); HDL remodeling; Defective SLCO1B3 causes hyperbilirubinemia, Rotor type (HBLRR); Transport of organic anions…	Selenium Micronutrient Network; Vitamin B12 Metabolism; Folate Metabolism	32	1	1.05078e+11	1.04353e+11	1.11626e+11	8.3257e+10	1.6185e+11	8.88595e+10	4.78919e+10	4.02067e+10	2.76544e+10	3.44485e+10	3.70583e+10	3.45985e+10	7.66509e+10	2.19247e+11	1.11617e+11	2.71168e+10	4.98878e+10	5.20137e+10	3.91981e+10	3.99873e+10	5.52221e+10	6.33394e+10	5.53084e+10	4.85916e+10
	Confidence	Annotated Sequence	Modifications	# Protein Groups	# PSMs	Master Protein Accessions	Positions in Master Proteins	Modifications in Master Proteins	# Missed Cleavages	Theo. MH+ [Da]	# Razor Quan Results	Abundance Ratio Adj. P-Value: (CP, Sample) / (Control, Control)	Abundance Ratio Adj. P-Value: (IPMN, Sample) / (Control, Control)	Abundance Ratio Adj. P-Value: (PA, Sample) / (Control, Control)	Abundances (Normalized): F1: Control, Control, Patient01	Abundances (Normalized): F2: Control, Control, Patient02	Abundances (Normalized): F3: Control, Control, Patient03	Abundances (Normalized): F4: Control, Control, Patient04	Abundances (Normalized): F5: Control, Control, Patient05	Abundances (Normalized): F6: Control, Control, Patient06	Abundances (Normalized): F7: Control, Control, Patient07	Abundances (Normalized): F8: Control, Control, Patient08	Abundances (Normalized): F9: Control, Control, Patient09	Abundances (Normalized): F10: Control, Control, Patient10	Abundances (Normalized): F11: Control, Control, Patient11	Abundances (Normalized): F12: Sample, CP, Patient12	Abundances (Normalized): F13: Sample, CP, Patient13	Abundances (Normalized): F14: Sample, CP, Patient14	Abundances (Normalized): F15: Sample, CP, Patient15	Abundances (Normalized): F16: Sample, CP, Patient16	Abundances (Normalized): F17: Sample, CP, Patient17	Abundances (Normalized): F18: Sample, CP, Patient18	Abundances (Normalized): F19: Sample, CP, Patient19	Abundances (Normalized): F20: Sample, CP, Patient20	Abundances (Normalized): F21: Sample, CP, Patient21	Abundances (Normalized): F22: Sample, CP, Patient22	Abundances (Normalized): F23: Sample, CP, Patient23	Abundances (Normalized): F24: Sample, IPMN, Patient24	Abundances (Normalized): F25: Sample, IPMN, Patient25	Abundances (Normalized): F26: Sample, IPMN, Patient26	Abundances (Normalized): F27: Sample, IPMN, Patient27	Abundances (Normalized): F28: Sample, IPMN, Patient28	Abundances (Normalized): F29: Sample, IPMN, Patient29	Abundances (Normalized): F30: Sample, IPMN, Patient30	Abundances (Normalized): F31: Sample, IPMN, Patient31	Abundances (Normalized): F32: Sample, PA, Patient32	Abundances (Normalized): F33: Sample, PA, Patient33	Abundances (Normalized): F34: Sample, PA, Patient34	Abundances (Normalized): F35: Sample, PA, Patient35
	High	[K].VHTECCHGDLLECADDRADLAK.[Y]	3xCarbamidomethyl [C5; C6; C13]	1	423	P02768-1	P02768-1 [265-286]		1	2585.12	14	0.864653	0.996478	0.704857	1.97844e+08	1.10922e+08	1.35864e+08	5.85022e+07	6.35528e+08	1.1658e+08	4.68344e+07	4.79001e+07	4.80913e+07	5.94629e+07	3.77535e+07	3.51403e+07	1.93911e+08	2.66754e+09	4.8021e+08	3.54131e+07	6.14752e+07	7.74205e+07	6.06102e+07	4.81208e+07	4.96227e+07	8.34479e+07	6.29305e+07	5.38668e+07	5.37773e+07	9.84526e+07	5.98371e+08	4.64705e+07	9.78442e+07	5.69773e+07	5.20134e+07	6.03336e+07	7.06583e+07	3.44498e+09	4.95155e+08
	High	[K].EFNAETFTFHADICTLSEK.[E]	1xCarbamidomethyl [C14]	1	1060	P02768-1	P02768-1 [525-543]		0	2260.02	13	0.378818	0.95197	0.337518	1.07151e+07	1.68994e+07	1.44096e+07	2.23583e+07	1.16085e+08	2.06162e+07	687817	2.39336e+06	1.44206e+06	2.71156e+06	2.26395e+07	1.88562e+06	1.53431e+07	6.59478e+07	3.1906e+07	4.87878e+06	5.20035e+06	4.68848e+06	6.27649e+06	349995	6.37178e+06	5.97087e+06	1.07115e+06	1.00786e+07	1.96009e+07	5.55042e+07	5.32871e+06	1.81273e+06	1.35951e+07	5.10898e+06	1.61074e+07	1.92353e+07	2.34026e+07	1.03185e+08	2.49863e+07
	High	[K].SHCIAEVENDEMPADLPSLAADFVESK.[D]	1xCarbamidomethyl [C3]; 1xOxidation [M12]	1	688	P02768-1	P02768-1 [311-337]		0	2990.34	7	0.000383109	0.600526	7.67959e-05	4.73976e+07	2.96393e+07	1.95077e+07	1.87783e+07	7.75901e+07	1.37802e+07	4.35522e+06	6.64062e+06	3.56003e+06	9.52909e+06	5.00333e+06	1.28081e+06	7.71414e+06	7.38798e+07	4.24466e+07	3.74364e+06	4.56538e+06	475920	880543	1.37044e+06	977398	76449	238881	6.4337e+06	7.55516e+06	1.32314e+07	5.28608e+07	2.3104e+07	7.39167e+06	5.28689e+06	3.68703e+06	5.57125e+06	9.2098e+06	1.89985e+08	7.39382e+07
	High	[R].LVRPEVDVMCTAFHDNEETFLK.[K]	1xCarbamidomethyl [C10]; 1xOxidation [M9]	1	903	P02768-1	P02768-1 [139-160]		0	2666.26	13	0.0211962	0.496321	0.0977961	3.16348e+07	3.58427e+07	2.06128e+07	2.05642e+07	8.20612e+07	4.78944e+07	4.59596e+06	3.78602e+06	1.68258e+06	4.21342e+06	3.95226e+06	1.71738e+06	3.43854e+07	7.87303e+08	5.23335e+07	2.12411e+06	7.03695e+06	2.29376e+06	3.4513e+06	4.18514e+06	4.15064e+06	3.72855e+06	4.08793e+06	5.67779e+06	1.01461e+07	2.05126e+07	9.69215e+06	1.32604e+07	1.08337e+07	5.24267e+06	5.31801e+06	1.08269e+07	9.25463e+06	1.06177e+09	1.95072e+07
	High	[K].SHCIAEVENDEMPADLPSLAADFVESK.[D]	1xCarbamidomethyl [C3]	1	46	P02768-1	P02768-1 [311-337]		0	2974.34	0	4.74369e-17	0.934073	3.66332e-17					6.58491e+06	587593	2.79608e+06	3.01416e+06	1.53814e+06	2.76572e+06														2.30732e+06	1.29788e+06	3.44663e+06	1.45937e+07	2.02105e+06	1.97118e+06	2.48144e+06	1.95842e+06
	High	[K].CCAAADPHECYAK.[V]	3xCarbamidomethyl [C1; C2; C10]	1	2390	P02768-1	P02768-1 [384-396]		0	1552.6	97	0.816961	0.490098	0.834271	5.37834e+09	4.4337e+09	9.95658e+09	3.79903e+09	1.54165e+10	3.2279e+09	2.12033e+09	2.04953e+09	9.96947e+08	1.15858e+09	1.80618e+09	1.41162e+09	2.99775e+09	1.05929e+10	4.2436e+09	1.37563e+09	1.88442e+09	2.81157e+09	1.39083e+09	1.65269e+09	2.08564e+09	2.74686e+09	1.77351e+09	1.7592e+09	2.4363e+09	3.38885e+09	1.58219e+09	1.16146e+09	1.70119e+09	1.45478e+09	1.75964e+09	2.62445e+09	2.05644e+09	2.19761e+10	4.44137e+09
	High	[K].VFDEFKPLVEEPQNLIK.[Q]		1	1686	P02768-1	P02768-1 [397-413]		0	2045.1	4	0.0266836	0.912995	0.125853	6.49537e+08	5.05256e+08	4.25141e+08	5.39487e+08	1.07057e+09	3.27934e+08	6.14325e+07	7.10479e+07	7.42464e+07	1.67193e+08	1.71223e+08	1.73346e+07	3.95354e+08	1.71602e+09	1.03271e+09	4.5336e+07	2.04349e+08	5.96352e+07	1.8146e+08	8.0601e+07	4.72319e+07	4.43209e+07	8.34775e+07	2.82433e+08	2.98293e+08	6.61089e+08	2.05321e+08	1.65128e+08	2.74941e+08	2.48036e+08	1.7273e+08	1.79974e+08	3.1402e+08	2.66738e+09	8.95114e+08
	High	[K].VHTECCHGDLLECADDR.[A]	3xCarbamidomethyl [C5; C6; C13]	1	69	P02768-1	P02768-1 [265-281]		0	2086.84	3	0.00282126	0.717452	0.292631				964813	6.76694e+06								1.08942e+07	6.56974e+07	1.87939e+07			808180						558902	1.29534e+06	1.78995e+06	1.35714e+06		425966			1.49615e+06	411778	7.30985e+07	5.99228e+06
	High	[K].QNCELFEQLGEYK.[F]	1xCarbamidomethyl [C3]	1	2040	P02768-1	P02768-1 [414-426]		0	1657.75	92	0.0100298	2.11244e-05	0.230324	5.90154e+08	5.20938e+08	4.45787e+08	4.9587e+08	1.08265e+09	3.21208e+08	4.08502e+07	2.09057e+07	1.04956e+07	2.00706e+07	1.05285e+07	9.89467e+06	5.39652e+08	1.36021e+09	7.33247e+08	1.64044e+07	5.05941e+07	4.30885e+07	2.19877e+07	5.29512e+07	1.31207e+08	1.23994e+08	9.18199e+07	3.47731e+07	1.00854e+08	1.61407e+08	9.39709e+07	1.83429e+07	4.34957e+07	2.63746e+07	3.46736e+07	6.03759e+07	5.62477e+07	2.63476e+07	3.63817e+08
	High	[K].TCVADESAENCDK.[S]	2xCarbamidomethyl [C2; C11]	1	1806	P02768-1	P02768-1 [76-88]		0	1498.58	16	0.343005	0.624577	0.287127	9.07914e+08	1.35503e+09	1.24296e+09	4.57606e+08	1.30087e+09	2.68901e+09	2.86049e+09	2.01865e+09	1.65256e+09	1.84225e+09	2.5878e+09	2.25545e+09	3.55618e+09	1.05461e+10	3.13213e+09	1.58968e+09	2.497e+09	3.22612e+09	2.18955e+09	2.37436e+09	2.74909e+09	3.728e+09	2.62506e+09	2.38116e+09	3.22533e+09	4.18042e+09	2.05114e+09	1.7197e+09	2.99754e+09	2.06055e+09	2.65287e+09	3.20575e+09	2.75774e+09	1.91682e+10	1.07101e+09
	High	[K].VPQVSTPTLVEVSR.[N]		1	459	P02768-1	P02768-1 [439-452]		0	1511.84	4	0.995777	0.433338	0.927112	1.49859e+08	2.02064e+08	1.75303e+08	1.43433e+08	4.59404e+08	1.06236e+08	5.23195e+07	3.63032e+07	8.32112e+06	2.31848e+07	3.06065e+07	2.91495e+07	1.98286e+08	8.55053e+08	3.61848e+08	3.19592e+07	5.32883e+07	6.65594e+07	2.53497e+07	4.3266e+07	1.60283e+08	1.12452e+08	1.49981e+08	4.94573e+07	9.09936e+07	1.77678e+08	1.75196e+07	3.30139e+07	5.96793e+07	8.85559e+07	4.39969e+07	7.97981e+07	8.3629e+07	6.28649e+08	3.19681e+08
	High	[R].LVRPEVDVMCTAFHDNEETFLK.[K]	1xCarbamidomethyl [C10]	1	137	P02768-1	P02768-1 [139-160]		0	2650.26	1	0.230798	0.157114	0.0494434	9.90821e+06	1.15203e+07	5.67347e+06	6.04791e+06	2.49472e+08	9.95773e+07	1.72909e+06	1.39756e+06	892482	1.10097e+06	590634	891285	4.56303e+06	8.47731e+06	8.5701e+06	2.64697e+06	2.80882e+06	644316	1.71662e+06	548193	572240	468113	1.27908e+06	512892	1.89723e+06	4.74401e+06	6.54202e+06	2.16712e+06	2.50186e+06	643112	1.69739e+06	12727.1	151813	1.3963e+06	779117
	High	[R].PCFSALEVDETYVPK.[E]	1xCarbamidomethyl [C2]	1	31	P02768-1	P02768-1 [510-524]		0	1754.83	0	0.768101	0.490835	0.446187	247050	209656	214651	231543	2.72163e+06	282122	14010.9	33157.4		19228.9	47786.1		452132	2.68864e+06	266487		43249	17381.1	23861.7	52570.3			94594.8	68097.7	144488	347732	138576	23479.4	29864.3	29720.4	41468	66337.6	52267.3	2.10481e+06	350668
	High	[K].LDELRDEGK.[A]		1	2687	P02768-1	P02768-1 [206-214]		1	1074.54	78	0.547427	0.223325	0.436756	1.04269e+10	7.43352e+09	8.5802e+09	6.89051e+09	8.78947e+09	5.53613e+09	2.60219e+09	2.33326e+09	1.62616e+09	1.86984e+09	2.48469e+09	1.81439e+09	4.01571e+09	1.31346e+10	6.25921e+09	1.71308e+09	2.76472e+09	2.93868e+09	2.50084e+09	2.24712e+09	2.64782e+09	3.36321e+09	2.57858e+09	2.37356e+09	3.29073e+09	5.35745e+09	2.15969e+09	1.39193e+09	2.66243e+09	2.26833e+09	2.31657e+09	2.94615e+09	3.1952e+09	2.49742e+10	7.16754e+09
	High	[K].KVPQVSTPTLVEVSR.[N]		1	4975	P02768-1	P02768-1 [438-452]		1	1639.94	93	0.291906	0.907422	0.932264	5.99166e+08	7.56877e+08	9.39975e+08	7.98323e+08	2.36341e+09	4.11981e+08	4.26762e+08	4.14897e+08	1.28092e+08	1.82435e+08	1.73452e+08	2.65767e+08	6.79652e+08	1.99581e+09	1.15185e+09	2.29017e+08	6.17221e+08	7.73702e+08	4.48089e+08	7.37909e+07	1.06854e+09	8.72021e+08	1.18812e+09	3.31478e+08	5.38777e+08	6.76242e+08	3.44512e+08	1.39212e+08	3.43149e+08	2.7655e+08	2.40128e+08	4.1529e+08	4.10426e+08	2.89421e+09	1.185e+09
	High	[K].YICENQDSISSK.[L]	1xCarbamidomethyl [C3]	1	2512	P02768-1	P02768-1 [287-298]		0	1443.64	23	0.502654	0.147151	0.893797	5.82478e+09	4.61764e+09	4.69043e+09	4.27208e+09	4.81335e+09	4.0799e+09	1.61167e+09	1.28599e+09	1.09089e+09	1.33328e+09	1.28145e+09	1.51149e+09	1.76885e+09	4.00316e+09	3.28899e+09	1.06588e+09	1.78747e+09	2.07991e+09	1.6235e+09	1.84024e+09	2.02584e+09	2.17995e+09	2.32597e+09	1.56359e+09	1.78209e+09	2.69509e+09	1.202e+09	1.40272e+09	1.64685e+09	1.49914e+09	1.56934e+09	1.43025e+09	1.73549e+09	7.17374e+09	3.929e+09
	High	[K].AAFTECCQAADK.[A]	2xCarbamidomethyl [C6; C7]	1	1965	P02768-1	P02768-1 [187-198]		0	1371.57	20	0.502212	0.2439	0.839116	6.43733e+09	5.03869e+09	4.98111e+09	4.95308e+09	1.11875e+10	5.04807e+09	2.14213e+09	1.50418e+09	1.29022e+09	1.49414e+09	1.792e+09	1.72409e+09	2.31751e+09	5.59955e+09	3.90513e+09	1.30137e+09	2.24238e+09	2.47361e+09	1.43557e+09	2.16862e+09	2.36952e+09	2.94804e+09	4.0803e+09	2.18872e+09	2.32356e+09	3.68399e+09	1.29678e+09	1.51082e+09	2.38965e+09	2.02422e+09	2.10192e+09	1.99107e+09	2.21261e+09	9.54694e+09	4.33936e+09
	High	[K].PLVEEPQNLIK.[Q]		1	1167	P02768-1	P02768-1 [403-413]		0	1279.73	39	0.417931	0.558031	0.892338	1.129e+09	1.39225e+09	1.4263e+09	1.20624e+09	3.97908e+09	8.00106e+08	5.77985e+08	6.0383e+08	2.31885e+08	3.2469e+08	3.41028e+08	1.97102e+08	1.41514e+09	4.24558e+09	1.94123e+09	1.97252e+08	6.98161e+08	2.46626e+08	2.65039e+08	3.09385e+08	6.34366e+08	3.93167e+08	3.20698e+08	6.73001e+08	7.57874e+08	1.25688e+09	3.44912e+08	1.9039e+08	4.6937e+08	3.85837e+08	4.36291e+08	7.98748e+08	6.56327e+08	6.21807e+09	1.81128e+09
	High	[K].LCTVATLRETYGEMADCCAK.[Q]	3xCarbamidomethyl [C2; C17; C18]; 1xOxidation [M14]	1	616	P02768-1	P02768-1 [98-117]		1	2365.03	11	0.00119831	0.564705	0.352748	3.68735e+07	3.84929e+07	4.4597e+07	3.52267e+07	2.07093e+08	3.7857e+07	3.18864e+07	1.52436e+07	1.6933e+06	2.27963e+06	2.56699e+06	1.85879e+06	3.00302e+08	1.13271e+09	3.36859e+08	2.82119e+06	1.17868e+07	2.62684e+06	2.02798e+06	1.86489e+06	8.1517e+06	1.52374e+07	4.02509e+06	1.32759e+07	4.10982e+07	4.70759e+07	1.97497e+07	5.52665e+06	2.78119e+07	1.84942e+07	1.11204e+07	4.93455e+07	2.98325e+07	1.26555e+09	1.70501e+08
	High	[K].ETCFAEEGKK.[L]	1xCarbamidomethyl [C3]	1	1397	P02768-1	P02768-1 [589-598]		1	1198.54	54	0.744621	0.851645	0.893758	3.8649e+08	1.43763e+09	1.21837e+09	3.12095e+08	7.52834e+08	1.95346e+09	1.32963e+09	7.59726e+08	5.76835e+08	7.85966e+08	9.61062e+08	6.975e+08	1.79618e+09	5.62231e+08	2.21462e+08	5.43965e+08	9.55764e+08	1.24517e+09	7.53015e+08	9.15857e+08	1.18586e+09	1.72568e+09	1.05513e+09	1.05508e+09	1.61368e+09	1.10524e+09	8.62068e+08	5.04002e+08	1.02948e+09	7.73295e+08	9.11913e+08	1.36221e+09	1.05732e+09	1.52967e+09	2.30711e+08
	High	[K].LCTVATLRETYGEMADCCAK.[Q]	3xCarbamidomethyl [C2; C17; C18]	1	181	P02768-1	P02768-1 [98-117]		1	2349.03	6	2.62716e-08	3.72538e-05	0.000539397	1.39088e+07	1.89156e+07	3.32508e+07	2.07742e+07	1.66039e+08	1.305e+07	809052	961761	668566	1.17086e+06	439236	166127	2.05533e+07	1.73066e+08	2.34707e+06	230740	283618	273064	286765	609226	478202	1.36835e+06	316746	278852	956635	3.65032e+06	8.40851e+06	478390	468510	1.20654e+06	1.30395e+06	358996	2.1638e+06	1.4351e+08	4.22159e+06
	High	[R].RPCFSALEVDETYVPK.[E]	1xCarbamidomethyl [C3]	1	1076	P02768-1	P02768-1 [509-524]		0	1910.93	14	0.00590008	0.115338	0.00847416	3.90448e+07	6.73518e+07	5.02651e+07	5.48941e+07	3.553e+08	9.63123e+07	1.57768e+06	4.78982e+06	888659	3.07502e+06	5.83323e+06	3.86143e+06	2.26986e+08	9.92074e+08	8.30329e+07	4.03398e+06	2.24324e+07	4.50219e+06	1.06051e+07	3.04945e+06	5.58885e+06	3.59242e+06	2.63801e+07	1.30374e+07	1.43012e+07	2.32781e+07	3.44243e+07	3.37475e+06	1.67929e+07	9.07894e+06	7.89995e+06	1.112e+07	1.28974e+07	1.52945e+09	7.09748e+07
	High	[K].QTALVELVK.[H]		1	791	P02768-1	P02768-1 [550-558]		0	1000.6	11	0.886734	0.946397	0.489999	1.46996e+09	1.77298e+09	1.52358e+09	1.44065e+09	3.60975e+09	1.06219e+09	9.5317e+08	7.71003e+08	4.2154e+08	5.48706e+08	5.48609e+08	3.68822e+08	1.84873e+09	4.91831e+09	2.57999e+09	2.12084e+08	7.97023e+08	6.52012e+08	1.87874e+08	7.66328e+07	7.80628e+08	8.1113e+08	3.28456e+08	8.7917e+08	1.01507e+09	1.77122e+09	7.23465e+08	7.04123e+08	9.25184e+08	9.15107e+08	7.14968e+08	1.01721e+09	9.80864e+08	1.92739e+07	2.13966e+09
	High	[K].ETCFAEEGK.[K]	1xCarbamidomethyl [C3]	1	2341	P02768-1	P02768-1 [589-597]		0	1070.45	65	0.40575	0.835863	0.488628	6.56138e+08	1.61548e+09	1.78746e+09	4.93106e+08	8.41419e+08	4.3846e+09	2.04086e+09	1.44109e+09	1.14448e+09	1.41601e+09	1.53672e+09	1.68381e+09	3.27849e+09	6.15491e+09	3.23112e+09	1.0597e+09	2.11389e+09	2.34076e+09	1.4098e+09	1.77297e+09	2.45766e+09	2.81408e+09	2.06474e+09	1.90342e+09	1.88024e+09	3.11379e+09	1.2206e+09	1.33112e+09	1.81133e+09	1.59181e+09	1.81161e+09	2.02027e+09	1.80468e+09	9.89958e+09	1.58028e+09
	High	[K].KQTALVELVK.[H]		1	385	P02768-1	P02768-1 [549-558]		1	1128.7	24	0.286078	0.0249969	0.892143	1.11305e+07	1.17349e+07	1.30454e+07	1.10706e+07	1.69799e+08	2.63007e+07	3.75785e+07	3.7265e+07	9.8595e+06	1.07734e+07	8.88522e+06	7.38992e+06	2.90544e+08	8.71228e+08	2.2718e+08	1.12622e+07	2.66943e+07	1.2113e+07	1.53719e+07	3.27828e+06	1.8473e+07	2.22676e+07	2.23328e+07	4.50307e+07	7.30212e+07	1.30916e+08	5.97827e+07	1.83141e+07	3.12309e+07	1.89915e+07	3.48192e+07	1.05173e+08	4.97426e+07	1.02502e+09	1.96212e+08
	High	[K].QEPERNECFLQHK.[D]	1xCarbamidomethyl [C8]	1	2261	P02768-1	P02768-1 [118-130]		1	1714.8	95	0.586621	0.982259	0.00849346	2.42311e+09	1.57879e+09	1.88184e+09	1.9468e+09	5.90639e+09	1.09457e+09	1.1762e+09	7.76401e+08	3.14549e+08	4.08364e+08	6.03138e+08	2.0516e+08	2.2633e+09	6.80042e+09	3.56231e+09	2.53423e+08	8.79269e+08	5.2624e+08	2.82247e+08	1.0767e+08	6.63942e+08	1.10485e+09	1.53935e+08	1.07597e+09	1.24232e+09	1.55946e+09	1.044e+09	4.21244e+08	1.10319e+09	6.35834e+08	7.42156e+08	1.01515e+09	7.1731e+08	9.6881e+09	3.01685e+09
	High	[K].SLHTLFGDK.[L]		1	373	P02768-1	P02768-1 [89-97]		0	1017.54	20	0.16717	0.54476	0.944819	1.63224e+07	3.62458e+07	2.83989e+07	1.68045e+07	1.26144e+08	3.45307e+07	1.2903e+07	1.57979e+07	3.47786e+06	5.2571e+06	2.0792e+06	1.64591e+06	5.32022e+07	2.65136e+09	1.03397e+08	3.56358e+06	5.32536e+06	603434	1.98291e+06	5.43704e+06	3.7937e+06	5.85187e+06	4.57024e+06	3.33087e+07	5.84652e+07	6.05256e+07	9.07653e+07	1.02698e+07	2.0009e+07	1.12459e+07	1.10118e+07	4.89306e+07	2.01766e+07	2.83781e+09	5.76791e+08
	High	[K].TPVSDRVTK.[C]		1	3398	P02768-1	P02768-1 [491-499]		1	1002.56	83	0.858303	0.964994	0.968053	3.9223e+09	8.66008e+09	9.62134e+09	4.15168e+09	3.45823e+09	6.8523e+09	3.43932e+09	2.58033e+09	2.05618e+09	2.69427e+09	2.5992e+09	1.95977e+09	5.08909e+09	1.32598e+10	6.26794e+09	1.47988e+09	2.31712e+09	3.66405e+09	2.78307e+09	3.4711e+09	3.74408e+09	5.8793e+09	3.62624e+09	3.28818e+09	2.64886e+09	6.78842e+09	2.84124e+09	1.9618e+09	3.21877e+09	2.44805e+09	3.39702e+09	3.72402e+09	3.04566e+09	3.70831e+09	6.67553e+09
	High	[K].AVMDDFAAFVEK.[C]	1xOxidation [M3]	1	2577	P02768-1	P02768-1 [570-581]		0	1358.63	89	0.788717	0.999895	0.421626	2.69882e+08	2.23245e+08	5.39318e+08	3.58372e+08	1.61563e+09	3.532e+08	5.35755e+08	5.10563e+08	2.10702e+08	2.74808e+08	1.79625e+08	2.16342e+08	1.43446e+09	3.75159e+09	1.84785e+09	1.18013e+08	6.2865e+08	1.45595e+08	2.29809e+08	4.48811e+08	3.59911e+08	2.37479e+08	4.77138e+08	4.2745e+08	7.16018e+08	8.1655e+08	3.07428e+08	1.71961e+08	3.67471e+08	2.15154e+08	2.42168e+08	4.52866e+08	2.95369e+08	6.59321e+09	1.3081e+09
	High	[R].ETYGEMADCCAK.[Q]	2xCarbamidomethyl [C9; C10]	1	1209	P02768-1	P02768-1 [106-117]		0	1434.53	15	0.59438	0.0604195	0.679331	6.23278e+08	6.18089e+08	5.9486e+08	6.92289e+08	2.26001e+09	7.54775e+08	1.63344e+08	1.57976e+08	8.90236e+07	9.92751e+07	2.18314e+08	1.28376e+08	5.168e+08	1.83522e+09	9.62595e+08	1.15319e+08	2.82214e+08	3.20659e+08	2.63438e+08	1.86444e+08	2.77984e+08	5.18772e+08	3.91347e+08	3.27137e+08	2.66179e+08	5.04328e+08	7.68348e+07	1.43594e+08	1.94248e+08	1.30905e+08	1.89756e+08	2.63765e+08	2.10347e+08	2.92335e+09	7.58197e+08
	High	[K].TYETTLEK.[C]		1	3807	P02768-1	P02768-1 [376-383]		0	984.488	74	0.60197	0.299413	0.987353	7.77175e+09	5.55044e+09	6.19269e+09	5.99259e+09	7.77419e+09	5.94837e+09	2.34058e+09	1.9042e+09	1.56862e+09	1.82276e+09	1.94412e+09	2.31137e+09	2.7378e+09	7.95007e+09	5.01635e+09	1.61872e+09	2.58113e+09	3.00266e+09	2.8309e+09	2.58622e+09	2.81377e+09	3.27192e+09	3.25229e+09	2.5754e+09	2.48281e+09	4.11507e+09	2.65005e+09	1.79626e+09	3.83297e+09	2.50393e+09	2.47707e+09	2.28162e+09	2.60778e+09	1.36411e+10	5.87516e+09
	High	[R].ETYGEMADCCAK.[Q]	2xCarbamidomethyl [C9; C10]; 1xOxidation [M6]	1	2813	P02768-1	P02768-1 [106-117]		0	1450.53	50	0.483954	0.810789	0.372043	8.01865e+08	2.05508e+09	3.41006e+09	4.39285e+08	7.05599e+08	1.94857e+09	1.02308e+09	6.06028e+08	6.29635e+08	6.90373e+08	7.08589e+08	8.75338e+08	7.66986e+08	2.13043e+09	1.19438e+09	4.8996e+08	6.8807e+08	1.12705e+09	5.14467e+08	1.11157e+09	1.11915e+09	9.54698e+08	1.15777e+09	6.44584e+08	9.69748e+08	1.36118e+09	9.60037e+08	6.58251e+08	9.01319e+08	9.26198e+08	8.1573e+08	8.26173e+08	1.03202e+09	5.63593e+09	1.32472e+09
	High	[K].ADDKETCFAEEGK.[K]	1xCarbamidomethyl [C7]	1	43	P02768-1	P02768-1 [585-597]		1	1499.63	3	0.990886	4.58126e-17	0.981586	818152		3.69602e+06		5.39822e+06	527561			747848			523797			837976								862672										986606		505327
	High	[K].SEVAHRFK.[D]		1	43	P02768-1	P02768-1 [29-36]		1	973.521	0	0.961647	0.996221	0.990076	1.51276e+07		1.04869e+07			7.47703e+06	1.47351e+06	4.01139e+06	1.91278e+06	4.56821e+06	4.01424e+06	32809	9.10163e+06	4.97213e+07	1.09328e+07	1.57037e+06	3.60221e+06	5.00526e+06	6.71224e+06	2.208e+06	5.6149e+06	3.34491e+06	1.90507e+06		4.03032e+06	6.6096e+06	4.40776e+06		2.17633e+06	4.4501e+06	3.7929e+06	7.04728e+06	2.82436e+06	9.37981e+07	1.85581e+07
	High	[K].LVNEVTEFAK.[T]		1	2449	P02768-1	P02768-1 [66-75]		0	1149.62	67	0.961915	0.985164	0.760554	1.1067e+09	3.00261e+09	1.64247e+09	1.41454e+09	4.22116e+09	1.38431e+09	8.72131e+08	1.12185e+09	4.84612e+08	6.33249e+08	6.82892e+08	6.51205e+08	1.51425e+09	4.03135e+09	2.93195e+09	5.71621e+08	1.18941e+09	6.01135e+08	5.96393e+08	7.25384e+08	2.2145e+09	9.55597e+08	1.06062e+09	1.22297e+09	1.27258e+09	2.28764e+09	7.90233e+08	6.3991e+08	9.99515e+08	1.0376e+09	9.00608e+08	1.11673e+09	1.18862e+09	6.81731e+09	3.07026e+09
	High	[K].LDELRDEGKASSAK.[Q]		1	131	P02768-1	P02768-1 [206-219]		2	1518.78	2	0.910315	0.720967	0.670233	4.5489e+06	2.27247e+06	5.61322e+06	1.17669e+06	2.14213e+07	1.35128e+07	1.32844e+07	7.13562e+06	9.52171e+06	5.7073e+06	5.31505e+06	4.41592e+06	3.21186e+07	3.78029e+07	1.34594e+07	5.94403e+06	5.83278e+06	6.91322e+06	4.5904e+06	3.52274e+06	1.057e+07	1.09541e+07	3.7712e+06	8.57351e+06	8.63531e+06	1.17418e+07	9.55939e+06	2.41345e+06	8.57328e+06	7.13844e+06	1.5368e+07	1.70587e+07	1.07218e+07		8.82217e+06
	High	[K].CCTESLVNRR.[P]	2xCarbamidomethyl [C1; C2]	1	60	P02768-1	P02768-1 [500-509]		1	1294.6	1	0.991418	0.8547	0.634373	2.89182e+07	2.79983e+07	3.69187e+07	1.40704e+07	8.36521e+07	1.22465e+07	1.85177e+07	6.01156e+06	4.31912e+06	6.23625e+06	1.12616e+07	8.77887e+06	3.05836e+07	1.02795e+08	4.45124e+07	5.92203e+06	1.24749e+07	9.65666e+06	1.02507e+07	7.80858e+06	1.54831e+07	2.56185e+07	6.81465e+06	1.07485e+07	1.3015e+07	1.37849e+07	1.0876e+07	5.98301e+06	8.19513e+06	7.85905e+06	8.10072e+06	1.01454e+07	9.47688e+06	9.30182e+07	2.34888e+07
	High	[K].CCTESLVNR.[R]	2xCarbamidomethyl [C1; C2]	1	1776	P02768-1	P02768-1 [500-508]		0	1138.5	44	0.716429	0.433768	0.930623	2.94348e+09	2.05823e+09	2.19513e+09	2.08517e+09	2.90047e+09	1.86084e+09	8.85391e+08	7.20496e+08	5.98163e+08	6.71801e+08	7.56438e+08	7.9791e+08	1.15021e+09	3.05584e+09	2.03667e+09	5.08428e+08	1.02673e+09	1.08558e+09	1.01188e+09	8.78521e+08	1.04633e+09	1.12209e+09	9.88562e+08	9.60558e+08	9.57567e+08	1.58408e+09	6.171e+08	6.79956e+08	9.56277e+08	9.47958e+08	8.99161e+08	8.52399e+08	1.00094e+09	5.74712e+09	2.16278e+09
	High	[K].AEFAEVSK.[L]		1	2810	P02768-1	P02768-1 [250-257]		0	880.441	63	0.723406	0.302528	0.877957	1.00507e+10	8.42095e+09	8.31548e+09	6.69168e+09	1.0371e+10	7.46154e+09	2.87079e+09	2.49731e+09	1.80627e+09	2.35628e+09	2.43723e+09	2.50498e+09	4.54295e+09	1.26676e+10	7.60932e+09	1.69619e+09	3.33839e+09	3.67053e+09	2.79669e+09	3.02272e+09	3.83032e+09	4.19117e+09	3.95026e+09	3.26722e+09	3.41765e+09	5.4292e+09	2.50299e+09	2.1354e+09	3.03193e+09	2.83974e+09	3.10974e+09	2.8146e+09	3.37668e+09	3.63146e+09	7.34119e+09
	High	[K].QRLKCASLQK.[F]	1xCarbamidomethyl [C5]	1	19	P02768-1	P02768-1 [220-229]		2	1231.69	0	4.74369e-17	4.58126e-17	0.639208			1.73346e+06		5.40936e+06
	High	[K].CCTESLVNRRPCFSALEVDETYVPK.[E]	3xCarbamidomethyl [C1; C2; C12]	1	147	P02768-1	P02768-1 [500-524]		1	3030.41	0	0.0168344	0.00102795	0.000788511	6.54556e+06	8.64164e+06	4.6185e+06	5.79471e+06	3.5027e+07	3.96797e+06	9678.12	2787.7	6164.92	66016.3	89243.6	229479	2.31463e+06	1.2703e+07	2.72141e+06	41370.8	57612.5	702619	131819	308986		374421		157085	269276	1.19487e+06	2.20784e+06	179698	292616	370607	226448	43678.3	78446.1	1.28065e+07	1.71708e+06
	High	[K].AVMDDFAAFVEK.[C]		1	317	P02768-1	P02768-1 [570-581]		0	1342.63	1	0.00123798	0.000253095	0.000724814	1.93503e+08	2.35961e+08	1.73369e+08	1.57905e+08	4.74615e+08	1.15665e+08	751190	1.29362e+06	1.21333e+06	3.69921e+06	2.00215e+07	5.98071e+06	3.41182e+07	2.77485e+07	3.65943e+07	9.56011e+06	3.3e+07	1.88215e+07	1.57374e+07	1.12374e+07	1.15071e+07	1.97145e+07	2.48656e+07	1.59848e+07	2.02456e+07	2.8971e+07	2.62715e+07	9.6559e+06	2.10971e+07	9.28753e+06	1.33071e+07	1.66704e+07	1.66739e+07	5.29455e+07	2.08139e+07
	High	[K].KLVAASQAALGL.[-]		1	241	P02768-1	P02768-1 [598-609]		1	1141.69	1	0.113381	0.6127	0.943588	2.01676e+07	2.82826e+07	2.71871e+07	5.17159e+07	5.15753e+07	6.502e+07	905188	1.67468e+06	780861	1.50176e+06	5.86952e+06	467361	6.7234e+06	7.89215e+06	4.86899e+06	1.01959e+06	6.06581e+06	1.06669e+07	8.31661e+06	3.54405e+06	1.91837e+06	5.2104e+06	1.6377e+07	1.62e+07	1.56316e+07	2.40011e+07	377806	5.75115e+06	6.38205e+06	9.78691e+06	1.1843e+07	8.00904e+06	1.62041e+07	1.70628e+07	704767
	High	[K].DDNPNLPR.[L]		1	2538	P02768-1	P02768-1 [131-138]		0	940.448	48	0.653052	0.213908	0.987881	8.35682e+09	7.73102e+09	7.4951e+09	6.65486e+09	7.64713e+09	6.66029e+09	2.79033e+09	2.3676e+09	1.75104e+09	2.13701e+09	2.04729e+09	2.3687e+09	3.65263e+09	9.70944e+09	5.96983e+09	1.86075e+09	3.02357e+09	3.58048e+09	2.45111e+09	2.84854e+09	3.45629e+09	3.80233e+09	5.00703e+09	3.16422e+09	3.2637e+09	5.21109e+09	2.38809e+09	2.19129e+09	2.82256e+09	2.66725e+09	2.75298e+09	2.85108e+09	3.39909e+09	1.71215e+10	7.64035e+09
	High	[R].LSQRFPK.[A]		1	1822	P02768-1	P02768-1 [243-249]		1	875.51	99	0.804383	0.8441	0.00934784	1.32896e+09	1.17442e+09	1.63793e+09	1.32562e+09	9.71574e+09	5.49151e+08	2.05525e+09	1.70447e+09	9.46145e+08	1.23874e+09	1.48863e+09	9.15421e+08	3.24749e+09	1.63755e+10	5.46162e+09	8.2331e+08	1.63029e+09	1.47873e+09	8.56762e+08	4.37689e+07	1.50521e+09	1.78169e+09	2.20915e+08	1.84636e+09	2.44049e+09	3.47674e+09	1.53925e+09	1.12938e+09	1.65252e+09	1.45534e+09	1.65334e+09	2.08606e+09	2.15062e+09	5.0982e+08	5.26932e+09
	High	[K].LCTVATLR.[E]	1xCarbamidomethyl [C2]	1	1512	P02768-1	P02768-1 [98-105]		0	933.519	37	0.867792	0.217506	0.779113	5.21509e+09	5.35388e+09	4.73183e+09	4.41304e+09	1.00338e+10	4.12695e+09	1.74041e+09	1.77999e+09	1.31332e+09	1.38448e+09	1.31691e+09	1.61263e+09	3.24071e+09	7.70118e+09	5.47547e+09	1.23442e+09	2.47443e+09	2.59803e+09	2.00292e+09	1.89286e+09	3.30073e+09	2.78746e+09	2.89141e+09	1.82719e+09	1.81525e+09	3.16627e+09	1.16993e+09	1.6676e+09	1.48389e+09	1.80684e+09	1.60432e+09	1.76448e+09	2.08358e+09	8.73256e+09	8.25774e+09
	High	[R].DAHKSEVAHR.[F]		1	6	P02768-1	P02768-1 [25-34]		1	1149.58	0
	High	[K].LVAASQAALGL.[-]		1	516	P02768-1	P02768-1 [599-609]		0	1013.6	4	0.866709	0.619513	0.962577	1.86959e+09	1.86299e+09	1.56622e+09	1.50391e+09	2.02174e+09	1.25564e+09	7.02566e+08	6.029e+08	3.21309e+08	5.4534e+08	4.19367e+08	5.30741e+08	8.92645e+08	2.61373e+09	1.62432e+09	5.19664e+08	9.70499e+08	6.865e+08	5.44374e+08	6.33326e+08	9.13031e+08	8.34928e+08	8.0045e+08	7.4838e+08	7.42755e+08	1.3757e+09	3.44899e+08	4.63353e+08	7.49401e+08	9.04442e+08	5.12002e+08	4.72555e+08	7.34359e+08	3.88368e+09	1.45331e+09
	High	[K].DLGEENFK.[A]		1	1835	P02768-1	P02768-1 [37-44]		0	951.442	53	0.929485	0.454146	0.968311	5.44574e+09	5.37501e+09	4.98041e+09	3.76497e+09	5.79312e+09	4.54893e+09	1.82423e+09	1.78035e+09	1.16369e+09	1.60959e+09	1.52712e+09	1.66472e+09	2.73635e+09	5.86397e+09	4.25412e+09	1.33188e+09	2.49696e+09	2.4982e+09	2.72491e+09	2.10395e+09	2.66009e+09	2.66375e+09	2.7522e+09	2.19435e+09	2.05682e+09	5.68736e+09	8.48051e+08	1.82821e+09	1.79782e+09	2.1399e+09	1.86577e+09	2.13173e+09	2.50161e+09	7.52406e+09	4.94066e+09
	High	[K].AACLLPK.[L]	1xCarbamidomethyl [C3]	1	1148	P02768-1	P02768-1 [199-205]		0	772.439	24	0.768038	0.268885	0.713151	4.19754e+09	4.32788e+09	4.34789e+09	3.80514e+09	4.88346e+09	3.86753e+09	1.57693e+09	1.32845e+09	1.02146e+09	1.30792e+09	1.16237e+09	1.32728e+09	3.95038e+09	1.06394e+10	5.65078e+09	1.07175e+09	2.1128e+09	2.02385e+09	1.73637e+09	2.10893e+09	2.33797e+09	2.67697e+09	2.45452e+09	1.78404e+09	1.69619e+09	3.10076e+09	1.1745e+09	1.42836e+09	1.70015e+09	1.68306e+09	1.45736e+09	1.64962e+09	1.80387e+09	5.60248e+08	4.19403e+09
	High	[K].YLYEIARR.[H]		1	56	P02768-1	P02768-1 [162-169]		1	1083.59	4	0.455459	0.947604	0.851671	1.53642e+07	1.49009e+07	1.68809e+07	7.87813e+06	4.91804e+07	1.71702e+07	1.33373e+07	1.18768e+07	6.71573e+06	8.21402e+06	7.13682e+06	9.84346e+06	5.96541e+07	2.12404e+08	6.51352e+07	1.01592e+07	2.73322e+07	1.74892e+07	1.36351e+07	1.20854e+07	2.32034e+07	2.14276e+07	1.78571e+07	1.42119e+07	1.3944e+07	2.02512e+07	1.78137e+07	1.1612e+07	1.47862e+07	1.4001e+07	1.03727e+07	9.54417e+06	9.22251e+06	1.56202e+08	4.10323e+07
	High	[K].ADDKETCFAEEGKK.[L]	1xCarbamidomethyl [C7]	1	6	P02768-1	P02768-1 [585-598]		2	1627.73	0			3.66332e-17
	High	[K].LVTDLTK.[V]		1	1072	P02768-1	P02768-1 [258-264]		0	789.472	18	0.526765	0.451616	0.56337	5.67345e+09	6.31473e+09	5.96177e+09	5.41318e+09	5.06965e+09	4.51113e+09	2.53654e+09	2.32928e+09	1.59435e+09	2.01808e+09	1.72323e+09	2.13757e+09	3.34658e+09	8.50444e+09	5.10695e+09	1.56651e+09	2.17961e+09	2.16201e+09	2.24364e+09	1.8099e+09	2.08601e+09	2.50949e+09	2.1281e+09	2.48608e+09	2.06302e+09	4.32374e+09	1.84592e+09	2.20042e+09	2.42077e+09	2.72227e+09	2.26566e+09	2.42898e+09	2.65e+09	1.10625e+10	6.82569e+09
	High	[K].YLYEIAR.[R]		1	831	P02768-1	P02768-1 [162-168]		0	927.493	13	0.955148	0.814955	0.767328	2.39192e+09	2.76242e+09	2.54187e+09	2.44409e+09	4.51906e+09	1.85121e+09	1.11904e+09	1.17074e+09	6.84097e+08	9.35508e+08	9.74486e+08	6.68041e+08	2.61166e+09	6.34087e+09	3.91415e+09	5.91539e+08	1.53543e+09	1.04253e+09	8.1054e+08	6.15937e+08	1.32757e+09	1.42056e+09	2.54344e+09	1.51136e+09	1.59108e+09	2.50506e+09	7.81532e+08	8.81569e+08	1.26469e+09	1.35454e+09	1.25245e+09	1.33576e+09	1.62709e+09	1.05455e+10	3.6616e+09
	High	[K].VFDEFK.[P]		1	270	P02768-1	P02768-1 [397-402]		0	784.388	8	0.997479	0.964614	0.413998	9.67727e+08	1.03633e+09	1.07941e+09	8.599e+08	3.85992e+09	5.95608e+08	7.65223e+08	6.24936e+08	4.0889e+08	6.03286e+08	6.01267e+08	3.5492e+08	1.65502e+09	5.36283e+09	2.01023e+09	3.8068e+08	8.01415e+08	6.98402e+08	4.10903e+08	2.13551e+08	5.89979e+08	6.64013e+08	3.5713e+08	7.21571e+08	8.53061e+08	1.65647e+09	3.75516e+08	3.52728e+08	6.768e+08	6.60937e+08	6.16832e+08	6.22211e+08	9.11267e+08	1.39721e+09	1.2849e+09
	High	[K].FQNALLVR.[Y]		1	1499	P02768-1	P02768-1 [427-434]		0	960.563	20	0.950382	0.998843	0.985154	3.05173e+09	2.41841e+09	2.26427e+09	1.84767e+09	7.54114e+09	1.20986e+09	1.51985e+09	1.38284e+09	8.21876e+08	1.08767e+09	9.55845e+08	7.75264e+08	2.70409e+09	7.57442e+09	4.74381e+09	7.864e+08	1.78336e+09	9.8356e+08	9.12753e+08	6.94146e+08	1.49802e+09	1.24973e+09	9.99515e+08	1.69062e+09	1.89007e+09	3.1463e+09	1.183e+09	9.54053e+08	1.36972e+09	1.54074e+09	1.40066e+09	1.76568e+09	1.80213e+09	1.19935e+10	4.50277e+09
	High	[K].PLLEK.[S]		1	804	P02768-1	P02768-1 [306-310]		0	599.376	42	0.926712	0.994201	0.655971	3.407e+08	1.15684e+09	1.50821e+09	3.66928e+08	6.95881e+08	7.61283e+08	6.13512e+08	4.90375e+08	3.47118e+08	4.21376e+08	5.92423e+08	2.9422e+08	1.60042e+09	4.10011e+09	1.03064e+09	4.19502e+08	5.79544e+08	5.6062e+08	3.31098e+08	4.58296e+08	5.59863e+08	2.07248e+09	8.73374e+08	6.82253e+08	9.93511e+08	1.24846e+09	3.33817e+08	3.25233e+08	5.86507e+08	5.1363e+08	4.7983e+08	9.41808e+08	6.17574e+08	1.57029e+08	8.6511e+08
	High	[K].ECCEKPLLEK.[S]	2xCarbamidomethyl [C2; C3]	1	30	P02768-1	P02768-1 [301-310]		0	1305.62	1	0.984959	0.809189	0.989485	704010	657966	795284	682787	3.34164e+06	1.44428e+06	310965		1.72736e+06	414100	700874		673417	3.49148e+06			679857	734673	196279	234591	187231	918895				203089	333306	511188			728688	1.66332e+06		5.61615e+06	2.10836e+06
	High	[R].NECFLQHK.[D]	1xCarbamidomethyl [C3]	1	162	P02768-1	P02768-1 [123-130]		0	1075.5	3	0.973478	0.94708	0.32378	3.83286e+07	2.30845e+07	3.95702e+07	2.89495e+07	1.16994e+08	1.76901e+06	1.93878e+07	1.30035e+07	6.76936e+06	8.76448e+06	1.27872e+07	442776	2.99505e+07	1.10365e+08	5.01842e+07	794525	1.75264e+07	1.06188e+07	683010	9.59984e+07	1.26986e+07	1.58702e+07	4.49989e+06	2.08582e+07	2.25879e+07	4.12687e+07	1.52689e+07	1.48031e+07	2.28009e+07	1.86529e+07	1.64559e+07	1.9737e+07	1.35886e+07	9.45454e+06	4.97627e+07
	High	[R].LKCASLQK.[F]	1xCarbamidomethyl [C3]	1	159	P02768-1	P02768-1 [222-229]		1	947.534	3	0.937452	0.660917	0.813715	6.23557e+06	2.14176e+06	8.20912e+06	3.64003e+06	3.35631e+07	4.68086e+06	5.97322e+06	3.42738e+06	3.79158e+06	6.26531e+06	7.46563e+06	2.45871e+06	1.12662e+07	2.75461e+07	1.44257e+07	4.4537e+06	2.85896e+06	6.24854e+06	3.56336e+06	1.7904e+06	3.88728e+06	6.04018e+06	3.38177e+06	1.17545e+07	1.00248e+07	9.81477e+06	9.38399e+06	5.14611e+06	7.02754e+06	3.99421e+06	1.1414e+07	4.4744e+06	4.46179e+06	5.73081e+07	7.36631e+06
	High	[K].LDELR.[D]		1	15	P02768-1	P02768-1 [206-210]		0	645.357	1	4.74369e-17	4.58126e-17	3.66332e-17												86782.8					227794		177083									18040.3					34062	1.74172e+06
	High	[K].VGSKCCK.[H]	2xCarbamidomethyl [C5; C6]	1	4	P02768-1	P02768-1 [457-463]		1	838.391	0	4.74369e-17	4.58126e-17	3.66332e-17														34914.6													9881
	High	[K].FGER.[A]		1	83	P02768-1	P02768-1 [230-233]		0	508.251	4	0.0197113	1.05934e-08	0.479133	1.11398e+07	7.58651e+06	7.96102e+06	4.45005e+06	1.27605e+07	516582						1.2357e+06				1.17153e+06		2.15046e+06	1.23173e+06	454578		869960			562172		3.45129e+06	80330.2	198456					2.17736e+07
	High	[K].LVAASQAALG.[L]		1	22	P02768-1	P02768-1 [599-608]		0	900.515	1	0.96928	0.932239	0.859972	1.0473e+06	802262	842516	281150	1.93245e+06	1.84492e+06	591607	544859	677889	829760	238954	366244	6.76395e+06		3.47672e+06	183762	1.09226e+06	281698	724912	487907	2.8968e+06	132794	1.73409e+06	436174	3.28257e+06	1.00767e+06	247103	1.4441e+06	1.16603e+06	871579	544467	1.96656e+06	2.07911e+06		3.93768e+06
	High	[K].NYAEAK.[D]		1	18	P02768-1	P02768-1 [342-347]		0	695.336	0			3.66332e-17
	High	[R].DEGK.[A]		1	6	P02768-1	P02768-1 [211-214]		0	448.204	1			3.66332e-17																																			3.81773e+06
	High	[R].NLGK.[V]		1	12	P02768-1	P02768-1 [453-456]		0	431.261	0	4.74369e-17	4.58126e-17	0.602841	1.09364e+07		4.32601e+06	2.55734e+06	1.36777e+07																													3.11596e+07
	High	[K].CASLQK.[F]	1xCarbamidomethyl [C1]	1	9	P02768-1	P02768-1 [224-229]		0	706.355	0	0.00136662	5.76494e-07	0.431916	5.08781e+06	3.35277e+06	5.06001e+06	1.85374e+06	1.27992e+07	5.13579e+06						113019	561931				143908	238125		285575		310585	554869			147824	133969		355820	156774	135560		262295	1.99711e+06
	High	[K].FGERAFK.[A]		1	25	P02768-1	P02768-1 [230-236]		1	854.452	0	0.589504	0.758593	3.66332e-17					929222		621193	327313	203053				1.14104e+06	8.91864e+06		280262									295488	721388	935089		994247		567558
	High	[R].FKDLGEENFK.[A]		1	1	P02768-1	P02768-1 [35-44]		1	1226.61	1			3.66332e-17																																	140154	3.03833e+06
	High	[K].HPEAK.[R]		1	33	P02768-1	P02768-1 [464-468]		0	581.304	0	0.694787	0.121294	0.878909	2.20883e+07	1.59577e+07	2.12336e+07	1.2799e+07	2.7787e+07	1.27205e+07	5.12395e+06	4.17532e+06	3.16615e+06	2.63853e+06	4.92581e+06	4.13865e+06	8.45071e+06	3.55253e+07	1.48393e+07	3.26184e+06	4.64885e+06	6.95749e+06	3.23838e+06	5.31187e+06	6.99245e+06	7.80886e+06	5.99944e+06	4.14369e+06	6.63614e+06	9.16199e+06	3.4793e+06	2.72459e+06	4.39335e+06	3.43588e+06	4.05089e+06	8.86744e+06	7.62291e+06	5.39421e+07	3.11786e+07
	High	[K].AWAVAR.[L]		1	445	P02768-1	P02768-1 [237-242]		0	673.378	14	0.937291	0.513672	0.796878	9.14824e+08	8.36198e+08	9.8148e+08	7.17828e+08	2.03203e+09	5.36104e+08	2.81377e+08	2.54817e+08	1.45769e+08	1.85592e+08	2.18165e+08	2.16257e+08	7.6134e+08	3.01104e+09	1.14942e+09	1.78838e+08	4.33196e+08	3.90449e+08	2.53344e+08	1.92032e+08	3.76242e+08	5.10598e+08	3.38158e+08	3.81787e+08	4.67638e+08	6.85822e+08	4.09778e+07	2.08463e+08	2.97462e+08	2.87834e+08	2.27043e+08	4.31644e+08	4.55588e+08	1.47803e+08	1.16333e+09
	High	[R].NLGKVGSK.[C]		1	10	P02768-1	P02768-1 [453-460]		1	802.478	2	0.358251	0.143065	0.00032587	472466	189458		257841				386223		288009	699512	42845.7	1.06388e+07	1.80266e+07	1.44167e+07		5.28807e+06			842493	807968	711696	1.18092e+06		1.37817e+06							739158	9.10527e+06	4.1213e+07
	High	[K].KLVAASQAALG.[L]		1	9	P02768-1	P02768-1 [598-608]		1	1028.61	4	1.01163e-07	0.632866	0.496472							2.93914e+06	2.52552e+06	2.89965e+06	3.23665e+06	1.24642e+06		2.07917e+07	1.33829e+08	4.63279e+07		410319							781515	735701	1.51588e+06	9.7156e+06	1.22402e+06	1.2147e+06	3.20411e+06	3.87153e+06	1.2304e+07	723787	1.03609e+09	1.40824e+07
	High	[K].TPVSDR.[V]		1	1	P02768-1	P02768-1 [491-496]		0	674.347	0
	High	[K].ATKEQLK.[A]		1	3	P02768-1	P02768-1 [563-569]		1	817.478	0			3.66332e-17
	High	[K].SEVAHR.[F]		1	44	P02768-1	P02768-1 [29-34]		0	698.358	2	0.0075891	4.58126e-17	0.747596							3.91606e+06	2.95463e+06	2.16814e+06		1.08181e+06	26423.1						1.80613e+06	11622.9	1.86478e+06
	High	[K].LKECCEK.[PK]	2xCarbamidomethyl [C4; C5]	2	7	P02768-1; P43652	P02768-1 [299-305]; P43652 [299-305]		1	966.438	0	0.54255	0.373453	0.891356	683735	322624	484333													146794		234415	108669	804721	2740.23	142672	592286						181872	173698	154344		97044
	High	[K].ERQIK.[K]		1	10	P02768-1	P02768-1 [544-548]		1	673.399	1	0.986782	0.149346	0.984202	4.55171e+06		3.7939e+06	2.13473e+06	2.35734e+06	2.81205e+06	6.18225e+06	3.76836e+06	4.44844e+06	1.55044e+06	3.62361e+06	692544	3.70822e+06			3.38831e+06		4.25649e+06	914768	4.437e+06	2.88454e+06	4.51668e+06			744171	1.15784e+06			1.40574e+06	468831		2.6742e+06	2.69812e+06	3.06804e+08	1.16073e+06
	High	[K].VPQVSTPTLVEVSRNLGK.[V]		1	2	P02768-1	P02768-1 [439-456]		1	1924.09	0
	High	[K].ERQIKK.[Q]		1	22	P02768-1	P02768-1 [544-549]		2	801.494	0	0.150664	0.00337297	0.0369697		330174	800923	235159	626708	423850						12432.8				12264.8	42826.4	69900.2	14978.2	69790.2		133921	437825	12060.5	26062.2			15128.8	39226.2	18231.8		27234.5	51033.8
	High	[K].VGSK.[C]		1	9	P02768-1	P02768-1 [457-460]		0	390.235	1	0.0350202	0.643279	0.0959513	3.4226e+06	3.34469e+06	2.83029e+06	2.35057e+06	3.12722e+06	4.36856e+06	1.14044e+06	1.19887e+06				70962	552856		2.34369e+06	40721.9	242224	54194.3	4.06052e+06	2.96273e+06	265914	548589					1.27709e+06	1.50381e+06		2.0926e+06					1.54849e+06
	High	[K].ASSAK.[Q]		1	1	P02768-1	P02768-1 [215-219]		0	463.251	0
	High	[K].YICENQDSISSKLK.[E]	1xCarbamidomethyl [C3]	1	1	P02768-1	P02768-1 [287-300]		1	1684.82	1	0.931298	0.486144	0.693672	216797		1.042e+06	965922	214500			854473	31863	22729.3			320269	2.29595e+06	1.27749e+06		283327	25259.5	48234.6	13697.6	313415			552908	655234	829162	213660	28945		469917	522932	786809	479953		1.03238e+06
	High	[R].LAKTYETTLEK.[C]		1	1	P02768-1	P02768-1 [373-383]		1	1296.7	0
	High	[K].ADDK.[E]		1	1	P02768-1	P02768-1 [585-588]		0	448.204	0
P01024	C3	Complement C3 [OS=Homo sapiens]	n/a	High		0	72	19474	129	1663	187	6.4	12396.8	cell organization and biogenesis;defense response;metabolic process;regulation of biological process;response to stimulus;transport	extracellular;membrane;organelle lumen	catalytic activity;enzyme regulator activity;protein binding	Pf00207, Pf01759, Pf01821, Pf01835, Pf07677, Pf07678, Pf07703, Pf10569, Pf11974	718	19	ENSG00000125730.16	Chagas disease (American trypanosomiasis); Staphylococcus aureus infection; Complement and coagulation cascades; Tuberculosis; Viral carcinogenesis; Legionellosis; Systemic lupus erythematosus; Pertussis; Herpes simplex infection; Phagosome; Leishmaniasis	Post-translational protein phosphorylation; Regulation of Insulin-like Growth Factor (IGF) transport and uptake by Insulin-like Growth Factor Binding Proteins (IGFBPs); Alternative complement activation; Peptide ligand-binding receptors; Regulation of Complement cascade; Activation of C3 and C5; Neutrophil degranulation; Immunoregulatory interactions between a Lymphoid and a non-Lymphoid cell; G …	Allograft Rejection; TYROBP Causal Network; Complement Activation; Complement and Coagulation Cascades	36	0	3.13313e+09	2.82424e+09	2.69633e+09	2.36567e+09	7.90024e+09	1.92587e+09	1.68186e+09	1.43386e+09	9.16422e+08	1.45241e+09	1.66975e+09	1.16645e+09	4.00387e+09	1.15477e+10	4.95938e+09	1.05907e+09	1.92343e+09	1.41961e+09	1.16778e+09	1.07416e+09	1.87662e+09	2.31458e+09	1.10814e+09	1.92654e+09
	Confidence	Annotated Sequence	Modifications	# Protein Groups	# PSMs	Master Protein Accessions	Positions in Master Proteins	Modifications in Master Proteins	# Missed Cleavages	Theo. MH+ [Da]	# Razor Quan Results	Abundance Ratio Adj. P-Value: (CP, Sample) / (Control, Control)	Abundance Ratio Adj. P-Value: (IPMN, Sample) / (Control, Control)	Abundance Ratio Adj. P-Value: (PA, Sample) / (Control, Control)	Abundances (Normalized): F1: Control, Control, Patient01	Abundances (Normalized): F2: Control, Control, Patient02	Abundances (Normalized): F3: Control, Control, Patient03	Abundances (Normalized): F4: Control, Control, Patient04	Abundances (Normalized): F5: Control, Control, Patient05	Abundances (Normalized): F6: Control, Control, Patient06	Abundances (Normalized): F7: Control, Control, Patient07	Abundances (Normalized): F8: Control, Control, Patient08	Abundances (Normalized): F9: Control, Control, Patient09	Abundances (Normalized): F10: Control, Control, Patient10	Abundances (Normalized): F11: Control, Control, Patient11	Abundances (Normalized): F12: Sample, CP, Patient12	Abundances (Normalized): F13: Sample, CP, Patient13	Abundances (Normalized): F14: Sample, CP, Patient14	Abundances (Normalized): F15: Sample, CP, Patient15	Abundances (Normalized): F16: Sample, CP, Patient16	Abundances (Normalized): F17: Sample, CP, Patient17	Abundances (Normalized): F18: Sample, CP, Patient18	Abundances (Normalized): F19: Sample, CP, Patient19	Abundances (Normalized): F20: Sample, CP, Patient20	Abundances (Normalized): F21: Sample, CP, Patient21	Abundances (Normalized): F22: Sample, CP, Patient22	Abundances (Normalized): F23: Sample, CP, Patient23	Abundances (Normalized): F24: Sample, IPMN, Patient24	Abundances (Normalized): F25: Sample, IPMN, Patient25	Abundances (Normalized): F26: Sample, IPMN, Patient26	Abundances (Normalized): F27: Sample, IPMN, Patient27	Abundances (Normalized): F28: Sample, IPMN, Patient28	Abundances (Normalized): F29: Sample, IPMN, Patient29	Abundances (Normalized): F30: Sample, IPMN, Patient30	Abundances (Normalized): F31: Sample, IPMN, Patient31	Abundances (Normalized): F32: Sample, PA, Patient32	Abundances (Normalized): F33: Sample, PA, Patient33	Abundances (Normalized): F34: Sample, PA, Patient34	Abundances (Normalized): F35: Sample, PA, Patient35
	High	[R].TMQALPYSTVGNSNNYLHLSVLR.[T]	1xOxidation [M2]	1	262	P01024	P01024 [440-462]		0	2594.3	8	0.94496	0.661813	0.888746	1.15407e+06	2.43208e+06	1.21757e+06	2.47532e+06	3.71121e+06	1.70222e+06	101024	184259	54812.6	39634.2	398524	1.47515e+06	1.18691e+06	3.60481e+06	315945	1.24109e+06	3.03781e+06	1.63407e+06	1.82376e+06	340235	3.53234e+06	1.62224e+06	1.4798e+06	245504	319008	492662	180175	546000	630274	902008	793820	499957	98267.3	5.29837e+06	1.34374e+06
	High	[K].DTWVEHWPEEDECQDEENQK.[Q]	1xCarbamidomethyl [C13]	1	92	P01024	P01024 [1625-1644]		0	2603.03	0	0.179136	0.634182	0.883782	1.50592e+06	1.40385e+06	1.53253e+06	2.7048e+06	9.52432e+06	1.10335e+06	248904	393581	65830	134248	173559		4.69051e+06	1.25289e+07	3.85267e+06	7890.45	180919				206180	133818		583262	930778	1.33999e+06		160493	160773	504726	209027	688199	344556	5.00397e+07	5.99399e+06
	High	[K].DYAGVFSDAGLTFTSSSGQQTAQR.[A]		1	270	P01024	P01024 [634-657]		0	2494.15	1	0.937978	0.751873	0.997956	991763	917686	556148	835399	1.54415e+06	729832	156050	185651	238860	1.05587e+06	238170	314266	1.15282e+06	2.32659e+06	684477	618746	643263	375689	458094	433676	548768	575625	533807	595319	345049	684966	417675	601378	373147	305676	315765	579393	251431	5.42224e+06	1.18801e+06
	High	[R].VPVAVQGEDTVQSLTQGDGVAK.[L]		1	210	P01024	P01024 [387-408]		0	2198.13	1	0.477726	0.710941	0.624775	3.21347e+06	3.51465e+06	6.5573e+06	4.59389e+06	2.96893e+07	3.4536e+06	1.89809e+06	2.10968e+06	641930	1.4268e+06	1.31169e+06	608204	3.51018e+06	5.17737e+06	7.87054e+06	800838	705358	997064	2.05084e+06	1.04929e+06	1.05989e+06	858903	2.45941e+06	4.63215e+06	3.58908e+06	3.7988e+06	834228	1.8564e+06	1.50612e+06	1.66386e+06	1.17279e+06	1.6659e+06	1.20809e+06	7.05346e+07	9.92359e+06
	High	[R].LESEETMVLEAHDAQGDVPVTVTVHDFPGK.[K]	1xOxidation [M7]	1	76	P01024	P01024 [36-65]		0	3266.55	5	0.405762	0.856509	0.773332	351673	141767	151326	154227	2.09004e+06	390753	211722	376473	80130.5	140448	134785	430846	1.96243e+06	4.92459e+06	2.95809e+06	254943	447153	764913	650860	227156	240696	1.73866e+06	391807	411900	47834.1	62540.3	25349	219710	309303	19154.8	111084	285728	87431.9	4.25977e+06	2.91539e+06
	High	[K].RIPIEDGSGEVVLSRK.[V]		1	34	P01024	P01024 [290-305]		2	1754.98	2	1.19305e-09	0.112861	0.119592					2846.38	6146.64		113532	135121	92679.7	133079		4.60601e+06	2.91107e+07	7.35873e+06										412664	597419	5.043e+06				155599	964744	361326	9.24617e+07	6.17706e+06
	High	[K].QKPDGVFQEDAPVIHQEMIGGLR.[N]	1xOxidation [M18]	1	6	P01024	P01024 [1112-1134]		0	2580.29	0	0.00262146	4.58126e-17	0.0299727	220989						16295.6						1.20007e+06
	High	[K].KQELSEAEQATR.[T]		1	426	P01024	P01024 [428-439]		1	1389.7	22	0.959895	0.979893	0.665856	1.88733e+08	1.30324e+08	1.70901e+08	8.8238e+07	9.37766e+08	1.51417e+07	1.38934e+08	8.37148e+07	7.02311e+07	8.47497e+07	1.46781e+08	1.05638e+08	1.88975e+08	7.27571e+08	2.47461e+08	1.1658e+08	1.26065e+08	9.09984e+07	3.94979e+07	3.25427e+07	7.26747e+07	7.47662e+07	2.4582e+07	1.02028e+08	1.94131e+08	2.04796e+08	1.33092e+08	8.29044e+07	1.62544e+08	9.32544e+07	9.66523e+07	1.74494e+08	1.0516e+08	2.99662e+09	4.42826e+08
	High	[K].DICEEQVNSLPGSITK.[A]	1xCarbamidomethyl [C3]	1	319	P01024	P01024 [1156-1171]		0	1789.86	3	0.454206	0.388073	0.613973	1.57301e+07	1.24366e+07	7.47491e+06	9.94002e+06	2.42147e+07	5.56705e+06	1.09471e+06	1.55642e+06	1.9668e+06	4.56648e+06	2.85783e+06	704520	8.15489e+06	4.24051e+07	1.12781e+07	1.213e+06	7.10589e+06	1.23016e+06	1.17878e+06	589705	3.40723e+06	5.95721e+06	806319	6.61126e+06	4.24775e+06	5.08775e+06	769616	1.53041e+06	5.85428e+06	1.58939e+06	1.25424e+06	3.97774e+06	3.23146e+06	5.58797e+07	2.25073e+07
	High	[R].SNLDEDIIAEENIVSR.[S]		1	387	P01024	P01024 [749-764]		0	1816.89	5	0.986782	0.994929	0.688686	6.96971e+06	4.06269e+06	4.42276e+06	7.52269e+06	1.02632e+07	713127	470967	1.05881e+06	1.55236e+06	1.74547e+06	1.6524e+06	3.2442e+06	6.0239e+06	2.81114e+07	1.0073e+07	682124	1.90803e+06	610406	537546	914940	1.6851e+06	1.5431e+06	855027	2.4895e+06	2.29411e+06	3.17931e+06	464154	1.42342e+06	1.58347e+06	1.60458e+06	1.51189e+06	2.2575e+06	1.83682e+06	1.45734e+07	7.87726e+06
	High	[K].EDIPPADLSDQVPDTESETR.[I]		1	487	P01024	P01024 [960-979]		0	2214	8	0.959895	0.6373	0.748895	6.52798e+06	7.57925e+06	4.66624e+06	7.46783e+06	1.62873e+07	4.63944e+06	2.75965e+06	2.445e+06	1.45776e+06	2.67996e+06	1.10831e+06	1.7953e+06	3.52994e+06	1.62081e+07	7.7339e+06	1.22066e+06	4.19668e+06	2.11613e+06	3.75046e+06	3.19528e+06	5.55741e+06	4.88743e+06	2.35691e+06	3.88546e+06	5.73779e+06	5.42237e+06	1.07205e+06	1.80161e+06	2.54692e+06	2.87608e+06	1.9808e+06	5.6912e+06	3.58837e+06	5.89017e+07	2.0119e+07
	High	[K].SGQSEDRQPVPGQQMTLK.[I]		1	154	P01024	P01024 [567-584]		1	1985.97	0	0.462013	0.347611	0.305213	1.70916e+07	1.69417e+07	1.81249e+07	1.98621e+07	3.5471e+07	1.51821e+07	5.19406e+06	4.75903e+06	3.20832e+06	6.41074e+06	5.2532e+06	3.879e+06	7.46943e+06	2.90669e+07	1.90644e+07	3.81699e+06	7.27998e+06	4.51434e+06	5.69536e+06	1.30675e+06	6.85117e+06	1.28472e+07	3.49494e+06	7.33646e+06	7.10537e+06	1.17284e+07	2.3632e+06	6.16793e+06	6.44573e+06	4.04043e+06	4.1311e+06	8.28208e+06	4.50228e+06	6.94989e+07	2.84861e+07
	High	[K].VSHSEDDCLAFK.[V]	1xCarbamidomethyl [C8]	1	172	P01024	P01024 [1451-1462]		0	1407.62	7	0.00954851	0.816678	0.887231	8.81759e+06	1.38559e+07	1.14306e+07	1.45949e+07	4.58581e+07	1.92835e+06	7.26171e+06	9.00297e+06	4.07602e+06	1.90417e+07	7.46128e+06	3.97657e+07	9.76416e+07	2.48548e+08	8.74861e+07	1.31569e+07	3.59532e+07	2.27306e+07	2.12289e+07	2.11988e+06	1.91519e+07	3.42942e+07	2.5501e+06	6.23944e+06	1.26254e+07	2.99548e+07	7.65037e+06	1.08134e+07	2.4631e+07	1.67688e+07	7.49585e+06	5.50571e+07	3.44259e+07	7.86122e+08	1.78583e+08
	High	[K].SGSDEVQVGQQR.[T]		1	528	P01024	P01024 [1571-1582]		0	1289.61	7	0.840109	0.915679	0.410822	5.15425e+07	2.17967e+08	1.71725e+08	4.26737e+07	3.4465e+07	1.48612e+08	1.14006e+08	8.22319e+07	5.24978e+07	1.06989e+08	9.40027e+07	8.83175e+07	1.53013e+08	3.79581e+08	1.86515e+08	7.11289e+07	9.33283e+07	1.02739e+08	1.19165e+08	7.38092e+07	9.98053e+07	1.44903e+08	7.85277e+07	1.13091e+08	1.50375e+08	1.44889e+08	8.04941e+07	1.00815e+08	1.37338e+08	7.94791e+07	8.26349e+07	1.51865e+08	9.35343e+07	1.86723e+09	2.90912e+08
	High	[K].VHQYFNVELIQPGAVK.[V]		1	133	P01024	P01024 [1463-1478]		0	1841.99	1	0.540157	0.222268	0.362358	3.35562e+06	3.23702e+06	4.83277e+06	7.40668e+06	1.67256e+07	5.97863e+06				168966	835299	404652	1.63579e+06	1.20043e+06	2.9237e+06	895884	1.71085e+06	984393	1.35421e+06	3.49663e+06	3.49733e+06	43798.8	6.66165e+06	1.17621e+06	1.46099e+06	3.42224e+06	742785	1.22382e+06	1.0542e+06	779926	1.25672e+06	1.1304e+06	1.65118e+06	2.37599e+07	2.64293e+06
	High	[K].SLYVSATVILHSGSDMVQAER.[S]	1xOxidation [M16]	1	124	P01024	P01024 [323-343]		0	2279.13	0	0.937452	0.871492	0.784055	801836	135367	395488	556264	141110	261604	479883	564226	400153	702626	552946	162382	340550	360124	543189	281465	93171.9	509008	443214	172232	408993	386477		997444	604810	1.09061e+06	55527.3	487605	776936	701409	518139	205932	116139	2.88203e+06	1.36329e+06
	High	[K].SGQSEDRQPVPGQQMTLK.[I]	1xOxidation [M15]	1	539	P01024	P01024 [567-584]		1	2001.97	6	0.942852	0.993473	0.937244	7.92078e+07	4.19644e+07	4.41369e+07	3.43714e+07	7.09698e+07	2.61128e+07	1.8629e+07	1.31082e+07	1.46505e+07	2.13808e+07	2.2761e+07	3.13978e+07	1.83288e+07	5.02118e+07	2.88192e+07	1.81017e+07	2.25114e+07	2.62095e+07	1.98213e+07	2.04272e+07	2.59162e+07	2.82511e+07	1.30453e+07	1.82411e+07	2.5432e+07	2.48418e+07	2.55166e+07	2.29247e+07	3.46485e+07	1.9946e+07	2.14762e+07	2.51109e+07	1.38948e+07	2.59174e+08	4.71474e+07
	High	[R].AYYENSPQQVFSTEFEVK.[E]		1	164	P01024	P01024 [208-225]		0	2166	0	0.953974	0.987034	0.955868	1.39407e+06	828819	2.03842e+06	1.28297e+06	8.42453e+06	507096	280204	47991	30016	293656	203328	276109	1.45423e+06	2.07076e+07	2.8248e+06	127510	593003	141403	271600	853242	694656	1.53238e+06	205316	476455	595255	551490	221282	315754	728410	590574	181345	686106	203089	3.62564e+07	7.38302e+06
	High	[K].FVTVQATFGTQVVEK.[V]		1	920	P01024	P01024 [105-119]		0	1653.88	47	0.38586	0.255218	0.0277846	743325	2.54566e+06	4.45672e+06	1.34644e+06	3.05779e+06	1.15114e+06	837799	612320	526506	1.29338e+06	1.65153e+06	1.65128e+06	5.65292e+06	9.69009e+06	8.90725e+06	3.16593e+06	4.55254e+06	1.78211e+06	7.75627e+06	4.32417e+06	3.0092e+06	2.90386e+06	2.15707e+06	4.95143e+06	4.15868e+06	9.35867e+06	612432	3.17547e+06	3.73649e+06	3.47523e+06	4.4285e+06	1.19768e+07	2.22231e+06	2.62587e+08	1.19225e+08
	High	[K].GYTQQLAFRQPSSAFAAFVK.[R]		1	61	P01024	P01024 [1052-1071]		1	2217.15	1	0.723406	0.964467	0.898994	1.16004e+06	972207	309852	686868	3.09634e+06	100895	138310	492649	17947.6	3052.43	119458		854847	6.19015e+06	988551		440596		511912		386781			423222	434145	2.28727e+06	32584.6	307528	416999	291238	83964.8	570590	415041	1.16526e+07	4.67082e+06
	High	[R].ILLQGTPVAQMTEDAVDAER.[L]	1xOxidation [M11]	1	385	P01024	P01024 [980-999]		0	2173.08	6	0.924261	0.774448	0.932264	3.08895e+06	5.34766e+06	8.82946e+06	5.38747e+06	2.32929e+07	5.46829e+06	1.0406e+07	7.68024e+06	6.40196e+06	1.01584e+07	6.13277e+06	1.79125e+06	2.28599e+07	9.3379e+07	1.81606e+07	1.27274e+06	5.46213e+06	7.33355e+06	3.27638e+06	3.78325e+06	4.01017e+06	4.7753e+06	1.74641e+06	1.00371e+07	9.61394e+06	1.97608e+07	1.31914e+06	6.16624e+06	1.05156e+07	8.03795e+06	8.63381e+06	9.31402e+06	5.15843e+06	2.56592e+08	3.95974e+07
	High	[K].LSINTHPSQK.[P]		1	343	P01024	P01024 [409-418]		0	1124.61	15	0.991418	0.928661	0.236112	4.54358e+08	2.50679e+08	3.6957e+08	1.80775e+08	9.11372e+08	1.59351e+08	1.40191e+08	1.03871e+08	8.15953e+07	1.38578e+08	1.44943e+08	1.03071e+08	2.0626e+08	8.52387e+08	3.06275e+08	7.75867e+07	1.1557e+08	1.55616e+08	1.04076e+08	7.93974e+07	1.8299e+08	1.80456e+08	7.27715e+07	1.23876e+08	1.57826e+08	2.08735e+08	8.04152e+07	1.37441e+08	1.64956e+08	1.02011e+08	1.13643e+08	6.5325e+08	6.74352e+08	2.96209e+09	7.42765e+08
	High	[K].RIPIEDGSGEVVLSR.[K]		1	143	P01024	P01024 [290-304]		1	1626.88	0	0.363759	0.442047	0.750497	53452	449067	72976.9	488364	6.07434e+06	471125	5.52249e+06	2.68646e+06	43402.6	84822.5		691360	7.22688e+06	2.47589e+07	3.28386e+06	191692	1.96721e+06	329634	1.11566e+06		1.72718e+06	244570	5.48196e+06	164994	407828	177066	2.44662e+06		25058.2			123906		1.32206e+08	8.698e+06
	High	[R].CAEENCFIQK.[S]	2xCarbamidomethyl [C1; C6]	1	262	P01024	P01024 [1513-1522]		0	1298.55	9	0.664656	0.56484	0.919251	3.31849e+07	4.35657e+07	4.74597e+07	3.59926e+07	1.1019e+08	3.45707e+07	1.35182e+07	1.21729e+07	8.72581e+06	1.71113e+07	1.76675e+07	1.42151e+07	2.7981e+07	7.61159e+07	4.40966e+07	1.00809e+07	1.77406e+07	1.63866e+07	1.56309e+07	1.4549e+07	2.77296e+07	3.25206e+07	1.69476e+07	2.07014e+07	2.75269e+07	3.56002e+07	8.50875e+06	1.86528e+07	1.62587e+07	1.72336e+07	1.40703e+07	2.81474e+07	1.83266e+07	4.09496e+07	8.67503e+07
	High	[K].IRAYYENSPQQVFSTEFEVK.[E]		1	58	P01024	P01024 [206-225]		1	2435.19	2	0.0701669	0.75605	0.881369		324316	8267.92	102398	221088	322793	3398.06		178726	547241	106601	280631	107143	2.42009e+06	1.30436e+06	455507	51325	1.43777e+06	2.88155e+06	634073	1.87224e+06	1.57407e+06	1.88423e+06	200151		123526		45617.7	141947	45518.7	22827.8	394220	316041	99497.4	1.0828e+06
	High	[R].ILLQGTPVAQMTEDAVDAERLK.[H]	1xOxidation [M11]	1	74	P01024	P01024 [980-1001]		1	2414.26	3	0.681902	0.43958	0.455407	32123.9	48845.7	94150	20756.8	469449	267280	420776	423209	51232.2	308614	89882.3	23515.9	616055	2.40131e+06	633535	22702.2		132296	521647	21584.3		838460	11721.8	4326.41	37369.4	10566.3	18528.4			145760		7271.41	164015	907595	976774
	High	[R].TVMVNIENPEGIPVK.[Q]	1xOxidation [M3]	1	452	P01024	P01024 [162-176]		0	1655.87	11	0.879707	0.499164	0.671838	3.6098e+06	5.06775e+06	6.28144e+06	4.52772e+06	3.0578e+07	1.03865e+07	2.31475e+06	4.11291e+06	2.24583e+06	4.07467e+06	4.85211e+06	2.58861e+06	1.93615e+07	6.72822e+07	2.00777e+07	2.04719e+06	5.45928e+06	718310	2.65295e+06	4.83569e+06	1.91933e+06	3.32895e+07	8.41099e+06	1.81392e+07	1.86922e+07	2.66442e+07	2.12681e+06	6.70926e+06	1.10631e+07	4.08102e+06	3.18617e+06	1.57877e+07	8.47215e+06	2.06611e+06	8.81589e+06
	High	[R].TELRPGETLNVNFLLR.[M]		1	124	P01024	P01024 [463-478]		0	1872.03	0	3.26453e-05	0.00461201	0.219209	1.08969e+06	1.46188e+06	1.32753e+06	1.33165e+06	1.14931e+07	1.1473e+06	119565	85462.3	68121.1	90639.8	2944.82		706184		70904.6	24038.6	21564.9	41804	57327.2		28064.4	11006	13173.5	285605	134605	265060	13168.9	19674.1	137525	107767	37832.5	243819	114342	244322	1.09525e+06
	High	[R].LVAYYTLIGASGQR.[E]		1	361	P01024	P01024 [531-544]		0	1511.82	3	0.83634	0.994201	0.499811	3.42733e+06	5.74056e+06	2.11069e+06	2.93595e+06	3.28874e+07	4.16634e+06	959823	1.16923e+06	2.17888e+06	2.12224e+06	879999	2.17542e+06	1.92491e+07	5.25842e+07	1.52028e+07	1.17669e+06	1.62626e+06	3.68604e+06	3.26434e+06	1.37067e+06	4.21801e+06	2.45389e+06	3.4423e+06	3.3598e+06	4.43519e+06	3.62535e+06	585497	1.73558e+06	3.04834e+06	1.52488e+06	1.2411e+06	2.0784e+06	1.47865e+06	1.18376e+08	6.76613e+06
	High	[R].ILLQGTPVAQMTEDAVDAER.[L]		1	24	P01024	P01024 [980-999]		0	2157.09	1	4.74369e-17	0.684824	0.0165069	1.01887e+06	784387	773178	895230	2.51849e+06	530580																					423168
	High	[K].EYVLPSFEVIVEPTEK.[F]		1	120	P01024	P01024 [226-241]		0	1878.97	1	0.719437	0.999895	0.634373	2.58489e+06	1.06591e+06	2.38324e+06	2.11502e+06	9.40461e+06	398299	103148	195967	177743	329727	106563	120371	2.00787e+06	7.08792e+06	5.73941e+06	212381	81455.6	1.11181e+06		715668				152017	455859	304789	1.25661e+06	457021	350706	605802	146818	366355	213033	5.34211e+07	1.51424e+07
	High	[K].QELSEAEQATR.[T]		1	260	P01024	P01024 [429-439]		0	1261.6	2	0.870077	0.265943	0.944059	1.80989e+07	1.14738e+07	1.55653e+07	1.20384e+07	2.12911e+07	8.28699e+06	3.84438e+06	2.20514e+06	2.19446e+06	3.85455e+06	6.06805e+06	4.76104e+06	6.48973e+06	2.34785e+07	6.66e+06	3.66264e+06	3.65755e+06	5.8856e+06	1.08804e+07	3.52269e+06	4.38136e+06	8.17432e+06	2.94345e+06	3.24697e+06	2.62462e+06	5.73879e+06	2.38021e+06	3.80088e+06	2.7639e+06	3.09932e+06	3.91192e+06	7.65765e+06	2.74476e+06	1.3706e+07	1.22853e+07
	High	[K].DAPDHQELNLDVSLQLPSR.[S]		1	192	P01024	P01024 [1285-1303]		0	2147.07	11	0.955148	0.999895	0.951877	1.89008e+06	994980	1.21232e+06	1.37883e+06	9.47166e+06	534646	438076	743498	425792	1.36149e+06	1.11934e+06	632308	337159	1.60958e+07	752003	878895	1.00172e+06	1.44594e+06	2.27147e+06	704210	1.14263e+06	947755	210712	756620	579689	3.22957e+06	70482.9	1.02776e+06	1.36731e+06	1.56527e+06	1.32826e+06	1.25834e+06	896233	5.62412e+07	2.58386e+06
	High	[R].SYTVAIAGYALAQMGR.[L]	1xOxidation [M14]	1	236	P01024	P01024 [1186-1201]		0	1687.85	6	0.554685	0.90631	0.660513	2.52633e+06	2.97898e+06	1.95463e+06	2.59943e+06	3.5721e+06	1.06269e+06	229980	182819	141556	360647	644321	686150	1.56248e+06	2.79418e+06	5.70096e+06	409356	2.51578e+06	1.55497e+06	1.92587e+06	3.30182e+06	3.21088e+06	4.10207e+06	2.98421e+06	764563	1.09188e+06	2.1828e+06	246085	596341	1.38046e+06	537864	658587	1.17593e+06	266861	5.25693e+07	4.03741e+06
	High	[R].HQQTVTIPPK.[S]		1	507	P01024	P01024 [882-891]		0	1148.64	33	0.834767	0.810254	0.984347	4.279e+07	4.02733e+07	5.32549e+07	3.85406e+07	9.74751e+07	5.40408e+07	4.64932e+07	3.80547e+07	3.25988e+07	2.74622e+07	5.09997e+07	2.47032e+07	8.06549e+07	1.83189e+08	9.22554e+07	3.48182e+07	6.10126e+07	5.85138e+07	3.25557e+07	1.8148e+07	4.52748e+07	4.84464e+07	2.72136e+07	8.05703e+07	5.3036e+07	5.84638e+07	5.7502e+07	2.85337e+07	7.18507e+07	4.1143e+07	4.86249e+07	5.07474e+07	2.79223e+07	3.32347e+08	1.0073e+08
	High	[R].AVLYNYRQNQELK.[V]		1	67	P01024	P01024 [849-861]		1	1638.86	2	0.670582	0.129242	0.529269	220577	1.22444e+06	318995	3.58128e+06	7.59085e+06	3.98843e+06	3.21667e+06	3.47459e+06	2.46402e+06	5.45306e+06	1.0152e+06		1.33416e+06	2.249e+06	1.99818e+06	45143.7	1.43844e+06				118491		80355.1	1.00296e+06	674561	882172		591079		548505	660795	2.63273e+06	1.66701e+06	1.3474e+08	5.14268e+06
	High	[K].VLLDGVQNPRAEDLVGK.[S]		1	28	P01024	P01024 [306-322]		1	1823	0	0.897322	0.646552	0.470458	206607	388257		406974	125908			2585.52	11137.4		61672		6802.59		9914.66					281209		78985.8	73277.3	7151.66			17054.9	40981.1	45552.1	76750	80449.5	9662.55		4.79753e+06	55297.4
	High	[K].TGLQEVEVK.[A]		1	397	P01024	P01024 [905-913]		0	1002.55	15	0.871494	0.654192	0.975995	2.23862e+08	2.28525e+08	1.71635e+08	2.29665e+08	4.42351e+08	1.32833e+08	6.41537e+07	6.58328e+07	4.05136e+07	6.75137e+07	7.14789e+07	7.79799e+07	4.89093e+08	7.61961e+08	5.97304e+08	1.0068e+08	3.12995e+08	1.02172e+08	7.96121e+07	7.57999e+07	1.85147e+08	2.38449e+08	6.31904e+07	1.06184e+08	1.10942e+08	1.24506e+08	5.05388e+07	6.77821e+07	9.72333e+07	4.85937e+07	3.87294e+07	1.09619e+08	7.90677e+07	2.08083e+07	3.00849e+08
	High	[R].TVMVNIENPEGIPVK.[Q]		1	43	P01024	P01024 [162-176]		0	1639.87	0			3.66332e-17																																		5.35653e+06
	High	[K].IEGDHGAR.[V]		1	201	P01024	P01024 [585-592]		0	854.412	7	0.997795	0.946409	0.265898		746695	1.2743e+06	1.26832e+07	9.02481e+06		2.92399e+06	803206	738974	415945	1.00089e+06	148010				1.00213e+06		917548	218860	2.46246e+06	775378	3.29568e+06	3.58703e+06	718347	1.20725e+06			2.71528e+06	111590	748923		441331	12138.3	1.10324e+07
	High	[R].SGIPIVTSPYQIHFTK.[T]		1	252	P01024	P01024 [344-359]		0	1787.97	2	0.403476	0.941103	0.442124	2.26411e+06	5.52805e+06	3.97302e+06	3.70279e+06	6.15132e+06	3.54541e+06	302336	392313	921410	1.56555e+06	3.5329e+06	375784	4.70142e+06	520378	8.51661e+06	350586	3.48304e+06	474777	1.545e+06	1.56624e+06	791276	980184	1.0536e+06	6.61656e+06	7.20103e+06	6.59178e+06	184938	3.13591e+06	4.79079e+06	3.49882e+06	3.60491e+06	4.85995e+06	5.44063e+06	2.90988e+07	3.43198e+06
	High	[K].VYAYYNLEESCTR.[F]	1xCarbamidomethyl [C11]	1	344	P01024	P01024 [1479-1491]		0	1667.74	2	0.737138	0.118643	0.875497	9.78009e+06	1.21302e+07	8.98274e+06	1.12201e+07	1.85085e+07	4.53238e+06	1.39954e+06	1.41782e+06	393826	1.05163e+06	544042	696200	1.35779e+07	4.90964e+07	1.12517e+07	1.44211e+06	4.46277e+06	921923	2.0116e+06	1.25004e+06	2.72799e+06	2.43309e+06	2.2563e+06	1.13082e+06	5.0169e+06	7.00013e+06	1.11671e+06	1.10228e+06	1.25226e+06	1.21359e+06	2.20806e+06	4.8488e+06	2.61507e+06	1.37379e+08	1.30869e+07
	High	[K].AGDFLEANYMNLQR.[S]	1xOxidation [M10]	1	266	P01024	P01024 [1172-1185]		0	1657.76	14	0.973567	0.952698	0.0623359	3.47341e+06	2.79206e+06	3.84955e+06	4.81553e+06	1.11408e+07	2.29156e+06	1.68374e+06	1.88071e+06	884181	1.13018e+06	1.7546e+06	983362	8.70494e+06	2.45671e+07	1.44812e+07	846111	2.55838e+06	351828	1.32193e+06	2.34985e+06	1.68671e+06	4.6319e+06	2.49417e+06	3.54713e+06	3.78647e+06	1.15413e+07	1.15675e+06	2.37747e+06	2.81158e+06	2.1313e+06	2.21066e+06	5.28974e+06	2.8027e+06	2.14893e+09	1.6315e+07
	High	[R].EVVADSVWVDVK.[D]		1	342	P01024	P01024 [545-556]		0	1345.7	4	0.310897	0.394301	0.935487	1.12299e+07	9.8867e+06	7.1598e+06	9.36772e+06	3.78054e+07	5.41401e+06	1.75137e+06	2.12292e+06	788750	1.55476e+06	853796	1.17398e+06	1.47817e+07	3.39427e+07	9.31061e+06	735254	2.90943e+06	1.34551e+06	1.64448e+06	923723	1.93884e+06	1.07785e+06	1.54884e+06	3.15681e+06	4.49672e+06	5.98617e+06	719867	1.6927e+06	3.08529e+06	1.7935e+06	2.12223e+06	4.9961e+06	3.05144e+06	1.41327e+08	1.58448e+07
	High	[K].ENEGFTVTAEGK.[G]		1	348	P01024	P01024 [1326-1337]		0	1281.6	5	0.695815	0.717452	0.9603	8.10131e+07	6.94424e+07	6.30687e+07	9.82457e+07	1.95493e+08	6.8464e+07	2.35015e+07	2.7538e+07	1.84805e+07	3.44099e+07	2.9203e+07	2.84252e+07	8.05895e+07	1.67856e+08	1.05935e+08	1.67171e+07	3.67424e+07	2.38019e+07	3.1097e+07	2.43247e+07	4.46146e+07	4.91217e+07	3.23911e+07	4.44577e+07	4.69332e+07	6.85669e+07	2.8363e+07	4.06586e+07	4.07019e+07	2.59952e+07	3.01844e+07	4.28276e+07	3.57799e+07	6.60261e+08	1.55072e+08
	High	[K].VTLEERLDK.[A]		1	198	P01024	P01024 [1527-1535]		1	1102.61	5	0.939335	0.472446	0.909604	2.91327e+06	1.55653e+06	1.44397e+07		1.33152e+07	7.02644e+06		2.04971e+06	91363.3		421693	1.64492e+06	5.77541e+06	1.25637e+07	6.05417e+06	1.81297e+06	2.88752e+06	524971	1.81602e+06	1.94452e+06	964242	1.32355e+06	661401		874137	3.38926e+06		305853			859781	6.22886e+06	606502	4.19066e+08	8.11842e+06
	High	[K].CCEDGMRENPMR.[F]	2xCarbamidomethyl [C1; C2]	1	111	P01024	P01024 [693-704]		1	1554.59	3	0.37767	0.103932	0.766278	7.52353e+06	5.69373e+06	9.14249e+06	4.68448e+06	3.22617e+07	7.24296e+06	2.58758e+06	904551	967552	702743	2.49417e+06	1.11969e+06	6.22723e+06	3.05604e+07	9.94365e+06	913168	1.86909e+06	1.12657e+06	1.34876e+06	1.36154e+06	2.2271e+06	5.15655e+06	617663	4.37203e+06	2.63282e+06	4.71886e+06	1.26211e+06	904624	1.23632e+06	278017	1.31699e+06	4.06392e+06	687297	3.92682e+07	1.48291e+07
	High	[K].NTMILEICTR.[Y]	1xCarbamidomethyl [C8]	1	35	P01024	P01024 [1382-1391]		0	1250.62	3	0.192424	0.0174149	0.12818	1.83593e+06	1.47007e+06	3.96759e+06	3.81314e+06	1.82918e+07	972073		22596.4	4264.47	106761	35402.6	11775.1	3.22176e+06	9.38835e+06	2.33395e+06		608033	75467.8	1.64874e+06	187741	251798	101099	31274.4		132549	226054	184435	146718	45885.8			255627		4.41743e+07	4.33554e+06
	High	[K].QLANGVDRYISK.[Y]		1	25	P01024	P01024 [1420-1431]		1	1363.73	0	0.0584413	0.738063	0.498954	494005	384104	399126		5.63975e+06		1.33535e+06	976780	324413	1.13196e+06	466097		2.87023e+06	4.09364e+06	3.43611e+06									759285	1.09841e+06	1.39838e+06	582117		866108	940388		1.54127e+06	1.3073e+06	2.91383e+07	5.41978e+06
	High	[K].GQGTLSVVTMYHAK.[A]		1	33	P01024	P01024 [1338-1351]		0	1491.76	2	0.866279	0.121995	0.365795					8.30439e+06	1.29165e+06	1.09674e+06	1.09434e+06				1.80176e+06	1.26077e+07	4.70833e+07	1.01552e+07	888513	243722			457825	5.25772e+06		342543	131917	3.05099e+06	248627	911787		117319			448592	251036	2.88515e+07	1.64254e+07
	High	[K].VTIKPAPETEK.[R]		1	51	P01024	P01024 [1365-1375]		0	1212.68	1	0.937193	0.884889	0.974081				1.72151e+06	8.15311e+06		728001		568668			1.2371e+06	1.32162e+06	7.26972e+06		2.36879e+06				2.36772e+06	1.24865e+06	1.76194e+06	1.06352e+06		620877				987843			908887			1.68917e+06
	High	[K].TIYTPGSTVLYR.[I]		1	462	P01024	P01024 [137-148]		0	1370.73	20	0.97518	0.684824	0.880226	2.38004e+07	2.83507e+07	3.55804e+07	4.21441e+07	1.0621e+08	1.97121e+07	2.91642e+06	7.45093e+06	4.07119e+06	7.08623e+06	6.92823e+06	3.51403e+06	5.19264e+07	1.54124e+08	3.85747e+07	1.72618e+06	2.55045e+07	6.39294e+06	1.13524e+07	9.44043e+06	2.27432e+07	1.77551e+07	1.18805e+07	1.71206e+07	2.91875e+07	3.50086e+07	2.81704e+06	7.95358e+06	6.87919e+06	1.32582e+07	9.46118e+06	1.75634e+07	1.15946e+07	6.29737e+08	4.8027e+07
	High	[K].RAPSTWLTAYVVK.[V]		1	35	P01024	P01024 [1072-1084]		1	1491.83	3	0.871704	0.982869	0.956526	2.5431e+06	1.34531e+06	1.6896e+06	2.72437e+06	3.54814e+06	2.76255e+06	691374	771788	857725	1.11203e+06	1.17837e+06	576485	566204	6.38586e+06	843264	606705	1.67533e+06		1.06649e+06	258281	1.46301e+06	548741	2.94016e+06	1.99739e+06	1.28478e+06	3.17725e+06	13887.6	1.46311e+06	1.7869e+06	1.43614e+06	1.45007e+06	875240	1.201e+06	719094	2.78588e+06
	High	[K].PNLSYIIGK.[D]		1	74	P01024	P01024 [1616-1624]		0	1004.58	2	0.810482	0.968587	0.395716	1.23232e+06	1.65874e+06	1.92637e+06	2.46374e+06	3.74207e+06	2.10438e+06	214735	128149	157944	206796	561406	1.99175e+06	846892	2.13637e+06	1.19394e+06	1.23372e+06	371267	1.48727e+06	4.7158e+06	2.10681e+06	1.4566e+07	9.50696e+06	6.52081e+06	1.08672e+06	1.19642e+06	2.9895e+06	581315	1.96426e+06	864972	1.19998e+06	841976	519853	105892		464974
	High	[K].KVEGTAFVIFGIQDGEQR.[I]		1	15	P01024	P01024 [264-281]		1	1994.03	0	0.975067	0.978821	0.969309	656579	673959	358509	90415	244063			399391	12900.7		242823	250759	483578		66938.4	159518	376461	276481	284341	187901	258436	236383		337113	245284	458748		244774	327723	360567	368018	290950			871690
	High	[K].GYTQQLAFR.[Q]		1	170	P01024	P01024 [1052-1060]		0	1083.56	4	0.998318	0.955986	0.855298	5.20181e+07	5.00686e+07	3.39483e+07	4.43334e+07	8.70311e+07	1.52728e+07	1.23342e+07	1.48044e+07	1.08103e+07	2.05218e+07	1.30826e+07	7.33893e+06	8.0094e+07	2.98058e+08	6.58269e+07	5.45247e+06	1.75521e+07	1.14052e+07	1.55899e+07	3.88179e+06	1.68151e+07	2.79758e+07	9.25717e+06	2.22778e+07	2.72635e+07	3.13327e+07	1.05824e+07	1.71706e+07	1.58401e+07	1.10665e+07	7.66797e+06	1.71751e+07	1.78889e+07	4.36787e+08	4.46939e+07
	High	[K].VEGTAFVIFGIQDGEQR.[I]		1	16	P01024	P01024 [265-281]		0	1865.94	0	0.977612	0.8547	0.877957		191506	13824.1		247631		72873	21094.1	9015.05	6666.88	8499.74			29918.6				13001.9	32109	16508.8		20388.5					60423.4	35134	58927.6	2761.3	12491.8	19144		320066
	High	[K].DSITTWEILAVSMSDK.[K]	1xOxidation [M13]	1	7	P01024	P01024 [797-812]		0	1811.87	0	0.217554	0.319128	0.917768							47527	24759.2	12103.5	9762.09			41457.1	472873					7872.97			210475	226962				106042						61238.7		78805.8
	High	[R].LESEETMVLEAHDAQGDVPVTVTVHDFPGK.[K]		1	2	P01024	P01024 [36-65]		0	3250.56	0	0.485056	4.58126e-17	0.333098					331319								54102.3	156940				75315.4
	High	[K].LCRDELCR.[C]	2xCarbamidomethyl [C2; C7]	1	178	P01024	P01024 [1505-1512]		1	1121.52	14	0.938253	0.884468	0.218897	9.37156e+07	4.71293e+07	5.74932e+07	4.66865e+07	2.59658e+08	2.0428e+07	4.39007e+07	3.5621e+07	1.92792e+07	4.48629e+07	4.67063e+07	2.9447e+07	5.83195e+07	4.07393e+08	1.47569e+08	2.77295e+07	3.94619e+07	4.58764e+07	2.86727e+07	2.12001e+07	2.98239e+07	4.659e+07	1.43373e+07	4.52948e+07	6.6769e+07	6.46833e+07	2.72316e+07	3.34323e+07	3.82098e+07	3.28766e+07	2.97918e+07	5.48352e+07	3.75379e+07	2.45098e+08	1.54465e+08
	High	[K].AGDFLEANYMNLQR.[S]		1	29	P01024	P01024 [1172-1185]		0	1641.77	3	0.448845	0.0189891	0.212014	545477	814813	715448	477934	8.31314e+06	426802							377724	188325	301317		216864		10750.7		47209.5		64439.4			252426	77626.2	9493.48	10588.7	114878	168102		7850.9
	High	[R].MDRAHEAK.[I]		1	74	P01024	P01024 [479-486]		1	957.457	1	0.0885124	5.7089e-05	0.392823	1.7696e+06	2.17336e+06	3.01647e+06	1.14918e+06	2.4362e+06	2.96568e+06	112394	52309	22369.4	39033.9	70398.1	34875.6				19764.4	81445.9	157841	54075.6	226288	313384	1.53158e+06	1.31312e+06	60438.2	105414	56965.7	36018.5	83549.9	110269	57195.2	61828.8	96906.1	150714
	High	[K].SSLSVPYVIVPLK.[T]		1	123	P01024	P01024 [892-904]		0	1401.84	7	1.4047e-05	0.562012	0.520554	7.33196e+06	5.59735e+06	4.05876e+06	4.45039e+06	1.58881e+07	372975	3.29062e+06	3.96103e+06	1.72548e+06	6.20369e+06	2.27866e+06	29205.6	1.38673e+07	5.94418e+07	4.28092e+06	56022.9	51112.2		86892					4.03886e+06	2.18071e+06	2.10085e+06	1.86919e+06	536796	2.04481e+06	1.14798e+06	2.5836e+06	867077	1.04478e+06	5.25795e+06	1.73248e+07
	High	[R].ASHLGLAR.[S]		1	241	P01024	P01024 [741-748]		0	824.474	12	0.922083	0.470929	0.0711658	2.19521e+07	1.59784e+07	4.12743e+07	1.70379e+07	3.76511e+08	3.30872e+07	6.66614e+07	4.90936e+07	2.6786e+07	2.79048e+07	4.62972e+07	2.15591e+07	1.19227e+08	4.05778e+08	1.39138e+08	2.29782e+07	3.92948e+07	2.41571e+07	1.28895e+07	1.49382e+06	2.30494e+07	2.6551e+07	4.32429e+06	5.1246e+07	9.66853e+07	9.30368e+07	4.9517e+07	6.23914e+07	7.71256e+07	3.84731e+07	3.7998e+07	1.00239e+08	5.33939e+07	1.50998e+09	2.9257e+08
	High	[K].VFLDCCNYITELR.[R]	2xCarbamidomethyl [C5; C6]	1	49	P01024	P01024 [723-735]		0	1702.79	1	0.258672	0.275155	0.832403	211649	229206	246712	172173	786111	50441					14031.6	11219.2	121212	230229	97286.1	13511.8	24117.7	7497.04			19495.8	10470.2	44197.1		32780.3	99447	44682	15045.6	3619.78			19272.3	9283.59	1.31809e+06	199700
	High	[K].CCEDGMRENPMR.[F]	2xCarbamidomethyl [C1; C2]; 1xOxidation [M]	1	388	P01024	P01024 [693-704]		1	1570.59	6	0.246281	0.893323	0.9744	3.1324e+07	2.90114e+07	2.32298e+07	2.34549e+07	4.11745e+07	3.28823e+07	1.7432e+07	8.83554e+06	8.99457e+06	2.59593e+07	1.20691e+07	7.98229e+06	2.39679e+07	1.14308e+08	3.69658e+07	4.74646e+06	6.86325e+06	7.2969e+06	2.38411e+07	7.13949e+06	6.98201e+06	1.62861e+07	8.15327e+06	1.98092e+07	2.70955e+07	3.44148e+07	2.09646e+07	9.65199e+06	1.19513e+07	8.70063e+06	1.40645e+07	2.33756e+07	1.03048e+07	3.00751e+08	6.13605e+07
	High	[R].QPSSAFAAFVK.[R]		1	60	P01024	P01024 [1061-1071]		0	1152.6	1	0.758037	0.982259	0.00914361	1.5263e+07	1.69165e+07	1.42069e+07	1.65931e+07	2.45757e+07	6.49526e+06	5.23326e+06	8.84386e+06	1.39081e+06	4.6109e+06	2.28867e+06	2.17373e+06	2.84227e+07	1.12363e+08	2.5543e+07	1.7926e+06	4.10826e+06				1.14588e+07			1.17686e+07	5.80652e+06	1.82659e+07	1.9859e+06	9.18762e+06	5.21756e+06	8.36263e+06	7.48239e+06	8.86275e+06	7.32527e+06		3.27511e+07
	High	[K].ADIGCTPGSGK.[D]	1xCarbamidomethyl [C5]	1	449	P01024	P01024 [623-633]		0	1062.49	14	0.222047	0.236685	0.127428	1.96172e+07	2.65728e+07	2.51745e+07	1.03339e+07	1.49936e+07	3.97024e+07	9.5082e+07	1.24599e+08	6.33138e+07	9.3443e+07	8.98468e+07	4.63235e+07	7.54443e+07	1.32395e+08	4.68053e+06	4.4641e+07	7.75313e+07	8.06648e+07	4.42105e+07	6.37557e+07	1.02926e+08	1.49491e+08	6.93301e+07	1.04239e+08	1.26762e+08	2.24475e+07	6.80149e+07	1.03158e+08	9.0828e+07	7.74256e+07	6.81667e+07	1.35556e+08	7.63985e+07	2.44398e+07	1.05112e+07
	High	[R].SYTVAIAGYALAQMGR.[L]		1	2	P01024	P01024 [1186-1201]		0	1671.85	0
	High	[R].IPIEDGSGEVVLSR.[K]		1	38	P01024	P01024 [291-304]		0	1470.78	1	0.906777	0.966346	0.525394	103019	544091	354820	612244	2.78301e+06		79597.3	456562	76640.2	1.12887e+06	1.60058e+06	90484.3	2.68167e+06	4.54381e+06	2.58004e+06	93004.5	522848	243763	356083	89748.4	347471		211964	1.71418e+06	1.17395e+06	2.07909e+06	123900	328801	321970	429880	653148	1.43558e+06	290758	8.36242e+06	3.10309e+06
	High	[K].GQGTLSVVTMYHAK.[A]	1xOxidation [M10]	1	143	P01024	P01024 [1338-1351]		0	1507.76	6	0.319216	0.789753	0.599956	1.37284e+07	1.77983e+07	1.1466e+07	2.31593e+07	5.48008e+07	1.26595e+07	1.30215e+07	7.3245e+06	3.66576e+06	5.37126e+06	8.355e+06	3.34328e+06	3.82355e+07	7.24471e+07	4.86149e+07	1.05896e+06	1.29334e+07	4.57138e+06	3.43769e+06	1.62834e+06	4.50242e+06	5.09945e+06	3.1069e+06	2.11943e+07	1.77518e+07	2.79472e+07	5.84114e+06	1.16316e+07	1.86907e+07	1.54725e+07	6.26171e+06	2.24523e+07	1.06929e+07	4.12655e+07	6.50124e+07
	High	[K].QCQDLGAFTESMVVFGCPN.[-]	2xCarbamidomethyl [C2; C17]; 1xOxidation [M12]	1	21	P01024	P01024 [1645-1663]		0	2175.91	0	0.944458	0.945984	0.949815		133898		96309.8		42600.3	29760.9	21659.6	2593.99	2964.31	1974.02		591671	500456		35132.6	81032.8		31758.1	44573.9	46511.9	52350.8	51015.9		25327.6	31401.4	19852.8	18746.6		12078.8		64395.4		3.00491e+06	321567
	High	[K].NTMILEICTR.[Y]	1xCarbamidomethyl [C8]; 1xOxidation [M3]	1	107	P01024	P01024 [1382-1391]		0	1266.62	3	0.958206	0.976087	0.96463	9.89111e+06	1.10423e+07	1.03939e+07	9.37231e+06	1.97836e+07	7.92379e+06	7.60943e+06	1.00019e+07	4.43484e+06	1.11048e+07	8.63233e+06	4.56662e+06	2.00237e+07	4.1617e+07	2.06528e+07	5.30457e+06	1.38027e+07	9.01206e+06	8.35932e+06	5.3409e+06	9.84221e+06	1.27751e+07	6.00167e+06	1.46771e+07	1.95417e+07	2.05214e+07	9.5304e+06	6.35408e+06	8.66382e+06	1.05435e+07	8.15397e+06	1.44754e+07	1.05515e+07	3.03759e+07	3.33718e+07
	High	[K].ACEPGVDYVYK.[T]	1xCarbamidomethyl [C2]	1	218	P01024	P01024 [1536-1546]		0	1300.59	13	0.889627	0.924708	0.768894	6.06819e+07	8.38011e+07	5.72253e+07	7.21886e+07	1.07695e+08	462566	1.74908e+07	1.97619e+07	136718	2.59571e+07	2.55953e+07	1.80657e+07	3.77892e+07	1.06126e+08	5.54024e+07	571008	2.56611e+07	1.06681e+06	2.87114e+07	1.80006e+07	2.7111e+07	1.99982e+06	6.24267e+07	2.79697e+07	3.25395e+07	2.71394e+07	8.81263e+06	1.80152e+07	2.29944e+07	9.31682e+06	1.01597e+07	3.07324e+07	2.86711e+07	4.77518e+08	1.08077e+08
	High	[K].DSCVGSLVVK.[S]	1xCarbamidomethyl [C3]	1	67	P01024	P01024 [557-566]		0	1063.55	1	0.835057	0.0378499	0.919251	8.23612e+07	6.69391e+07	5.6385e+07	9.15846e+07	2.06366e+08	6.45295e+07	6.91172e+06	1.8017e+07	5.75886e+06	9.49932e+06	7.246e+06	1.40795e+07	8.56715e+07	2.75335e+08	9.02626e+07	1.10595e+07	4.64745e+07	7.19588e+06	1.67679e+07	3.95704e+07	3.06478e+07	5.05989e+07	3.2031e+07	1.76355e+07	5.25651e+07	1.96889e+07	8.11518e+06	9.39303e+06	1.77507e+07	1.04819e+07	1.45944e+07	3.81556e+07	1.95463e+07	8.22099e+08	1.10198e+08
	High	[R].AELQCPQPAAR.[R]	1xCarbamidomethyl [C5]	1	35	P01024	P01024 [658-668]		0	1240.61	1			3.66332e-17																																2.29991e+06	1.10623e+06	6.71033e+06	2.34288e+06
	High	[R].TRFISLGEACK.[K]	1xCarbamidomethyl [C10]	1	20	P01024	P01024 [711-721]		1	1281.66	2	0.892289	0.821648	0.945114	751301		324129	1.07921e+06	2.29369e+06		945771	1.09887e+06	147206	113093	379231		7.5414e+06	1.84935e+07	8.5147e+06		673338	518536		248386	481836	467550	236571	1.21077e+06	3.25094e+06	2.84696e+06	793844		1.30327e+06	556537	409373	4.69449e+06	500982	5.50218e+07	1.36561e+07
	High	[R].FISLGEACK.[K]	1xCarbamidomethyl [C8]	1	159	P01024	P01024 [713-721]		0	1024.51	8	0.881852	0.926797	0.916264	2.70583e+07	4.17029e+07	2.36371e+07	4.1669e+07	2.12433e+08	1.99421e+07	5.87619e+07	5.98696e+07	8.65413e+06	1.23301e+07	1.5344e+07	6.19281e+06	2.23995e+08	5.80277e+08	4.65107e+08	7.51116e+06	2.01281e+07	8.24139e+06	6.13259e+06	5.41812e+06	2.11225e+07	2.67688e+07	1.52615e+07	2.29474e+07	4.52266e+07	6.17672e+07	5.67541e+06	1.27944e+07	2.01965e+07	2.41874e+07	1.42776e+07	7.17076e+07	2.77041e+07	3.81359e+08	4.96805e+08
	High	[R].VVLVAVDK.[G]		1	60	P01024	P01024 [593-600]		0	842.535	0	0.979258	0.780501	0.93909	8.12525e+07	1.13333e+08	8.91396e+07	8.78656e+07	2.3337e+08	5.70348e+07	3.57881e+07	3.50402e+07	2.54641e+07	4.02935e+07	3.46845e+07	2.75611e+07	1.42728e+08	3.55842e+08	1.69962e+08	2.43507e+07	4.75675e+07	2.77904e+07	4.20732e+07	2.69669e+07	7.57396e+07	5.39173e+07	4.03863e+07	5.25002e+07	6.80653e+07	1.01542e+08	1.86539e+07	2.50251e+07	5.50689e+07	2.93556e+07	2.23211e+07	6.99236e+07	3.20787e+07	5.08415e+07	2.13156e+08
	High	[K].GLEVTITAR.[F]		1	124	P01024	P01024 [250-258]		0	959.552	3	0.603654	0.968208	0.731512	5.08713e+07	5.01323e+07	4.63733e+07	5.32321e+07	7.09522e+07	2.46383e+07	2.2536e+07	2.21507e+07	1.34225e+07	1.90696e+07	1.49165e+07	7.52302e+06	3.2196e+07	7.32303e+07	3.72444e+07	1.07859e+07	1.68502e+07	7.13867e+06	1.28984e+07	3.96609e+06	1.44121e+07	9.61218e+06	8.97377e+06	2.26018e+07	2.24152e+07	3.07393e+07	1.0189e+07	1.92727e+07	2.64807e+07	1.86281e+07	1.43973e+07	2.59165e+07	1.9592e+07	2.46668e+08	6.33931e+07
	High	[K].DFDFVPPVVR.[W]		1	279	P01024	P01024 [1245-1254]		0	1190.62	1	0.917577	0.893323	0.706142	1.00329e+07	1.33269e+07	6.19442e+06	7.01846e+06	3.61585e+07	6.21235e+06	1.31443e+07	9.90845e+06	2.53576e+06	5.68562e+06	2.17257e+06	3.85965e+06	1.89883e+07	1.57466e+08	1.44968e+07	4.5421e+06	4.21213e+06	5.83192e+06	4.45137e+06	1.91059e+06	5.35142e+06	1.72802e+07	3.19187e+06	4.55173e+06	1.62354e+07	8.01885e+06	2.9642e+06	1.00935e+07	6.04272e+06	4.35208e+06	1.17241e+06	7.45679e+06	4.58198e+06	3.70738e+08	3.76892e+07
	High	[R].TFISPIK.[C]		1	77	P01024	P01024 [1583-1589]		0	805.482	5	0.448374	0.692271	0.6348	5.88216e+06	5.60075e+06	4.58776e+06	3.08511e+06	1.65354e+06	5.03593e+06	4.47293e+06	4.03781e+06	4.29108e+06	4.60244e+06	2.16252e+06	1.32559e+06	714507	3.57181e+06	207487	1.10093e+06	109025	2.51492e+06	3.09553e+06	1.95732e+06	2.59074e+06	5.66509e+06	1.34776e+06	2.55361e+06	2.47533e+06	4.15131e+06	8.36678e+06	2.99912e+06	2.64445e+06	2.85459e+06	2.08461e+06	3.86009e+06	3.84373e+06	4.02678e+07	9.62805e+06
	High	[K].FLTTAK.[D]		1	139	P01024	P01024 [1210-1215]		0	680.398	4	0.942852	0.886614	0.823963	1.78598e+07	1.16576e+07	1.9647e+07	1.12959e+07	2.79984e+07	7.48445e+06	5.61559e+06	2.96399e+06	3.36942e+06	3.03537e+06	3.8274e+06	4.60097e+06	8.36389e+06	3.24056e+07	1.77714e+07	3.85593e+06	5.69371e+06	5.37866e+06	3.61043e+06	3.95554e+06	6.80296e+06	1.1405e+07	2.0389e+06	3.64155e+06	7.32454e+06	1.02251e+07	5.7218e+06	3.2174e+06	5.31906e+06	5.13466e+06	5.89793e+06	7.24616e+06	7.84049e+06	8.77262e+07	1.96715e+07
	High	[R].QPVPGQQMTLK.[I]		1	10	P01024	P01024 [574-584]		0	1226.66	2	0.746261	0.27336	0.206012			1.37361e+06	2.13294e+06	2.32176e+06	2.18434e+06	330124				277139	242642		2.22064e+06	607864		895151	563114	1.16418e+06		958248			535551	574589	699917			480252					2.97827e+06
	High	[R].SVQLTEK.[R]		1	107	P01024	P01024 [672-678]		0	804.446	11	0.325867	0.787234	0.321777	2.58476e+07	1.91385e+07	3.05223e+07	1.35895e+07	3.56548e+07	4.41022e+07	7.95495e+07	6.76577e+07	4.20541e+07	4.69998e+07	7.94315e+07	2.69303e+07	8.86406e+07	2.84839e+07		4.85163e+07	6.93558e+07	7.20632e+07	2.95308e+07	8.25027e+07	8.13244e+07	1.09107e+08	6.18284e+07	5.59177e+07	1.19241e+08	1.48647e+07	4.94845e+07	7.26547e+07	9.32458e+07	4.89122e+07	5.51718e+07	1.12099e+08	6.84167e+07	4.06216e+07	1.12821e+07
	High	[K].VLLDGVQNPR.[A]		1	378	P01024	P01024 [306-315]		0	1110.63	10	0.746913	0.655941	0.0800283	1.98412e+07	2.55631e+07	1.178e+07	2.10351e+07	5.88973e+07	1.87433e+07	2.86834e+06	5.50601e+06	2.74316e+06	6.72711e+06	3.96001e+06	2.9132e+06	9.5295e+06	2.99465e+07	2.41161e+07	4.89265e+06	8.77637e+06	3.36485e+06	4.3254e+06	1.35138e+06	1.10748e+07	8.51761e+06	2.20711e+06	8.06374e+06	8.10007e+06	8.20609e+06	3.88772e+06	6.03533e+06	7.5674e+06	5.03553e+06	4.96654e+06	4.01909e+07	4.38156e+07	5.87858e+07	3.24459e+08
	High	[R].IHWESASLLR.[S]		1	5	P01024	P01024 [1311-1320]		0	1211.65	0	0.535965	0.920819	0.907496		159814	78531.2	117501		138963		3390.03		108518	24038.2	23905.3	1483.89		3330.41	18682.5		27199.5	56529.6	37771.1		31178.6							81909.7		63331.4			1.48539e+07
	High	[R].FYHPEK.[E]		1	205	P01024	P01024 [1492-1497]		0	820.399	13	0.946538	0.900014	0.336708	1.03964e+08	4.50147e+07	7.53012e+07	3.81069e+07	4.78476e+08	1.5853e+07	5.62987e+07	2.90347e+07	2.49536e+07	4.1199e+07	7.43942e+07	2.77293e+07	1.10484e+08	5.40482e+08	1.27038e+08	2.78491e+07	3.09846e+07	3.69785e+07	2.54638e+07	8.31242e+06	3.75813e+07	7.08992e+07	7.9165e+06	6.16786e+07	1.34183e+08	1.258e+08	4.43424e+07	3.00932e+07	6.85712e+07	3.7726e+07	4.0252e+07	1.18085e+08	6.0705e+07	1.77558e+09	2.11873e+08
	High	[K].FYYIYNEK.[G]		1	174	P01024	P01024 [242-249]		0	1139.54	19	0.345772	0.941841	0.0154574	1.90103e+07	2.08971e+07	4.02492e+06	3.69278e+06	6.71482e+07	1.17942e+06	6.0007e+06	3.05273e+06	1.23272e+06	3.15879e+06	3.79062e+06	24543.7	988607		2.29854e+06	575601	396553	346505	1.20376e+06	953104	991648	2.11816e+06	3.25161e+06	7.07226e+06	610872	1.42557e+06	2.78307e+06	5.47863e+06	3.61353e+06	4.76656e+06	1.88805e+06	3.08022e+07	1.87058e+07	2.93446e+07	7.66735e+07
	High	[K].GVFVLNKK.[N]		1	65	P01024	P01024 [601-608]		1	904.561	0	0.881852	0.628301	0.465778		896952	791136		2.02428e+06	859920	538551	2.4367e+06						936607	3.84182e+06							347645	398380	298668	426708	730511	605800	145957	270382	763319		8.52298e+07	1.21952e+08	3.70217e+07	7.36778e+07
	High	[R].YYTYLIMNK.[G]	1xOxidation [M7]	1	89	P01024	P01024 [489-497]		0	1224.6	4	0.89401	0.989704	0.996569	2.34746e+06	3.66814e+06	5.4341e+06	1.8368e+06	7.43462e+06	1.45777e+06	1.32531e+06	1.28469e+06	531299	1.39833e+06	2.0759e+06	416987	6.14389e+06	1.47879e+07	6.17644e+06	1.04488e+06	3.38696e+06	592123	1.09364e+06	1.54851e+06	2.79418e+06	3.97363e+06	2.39265e+06	2.4132e+06	3.54703e+06	4.80299e+06	734933	581256	1.46975e+06	1.04189e+06	2.83717e+06	3.43516e+06	1.7015e+06	1.85543e+07	1.16369e+07
	High	[K].IWDVVEK.[A]		1	54	P01024	P01024 [616-622]		0	888.483	3	0.899029	0.922557	0.00227188	1.49708e+07	1.51802e+07	1.55544e+07	1.89009e+06	1.85471e+08	694970	8.304e+06	1.13727e+07	8.34193e+06	2.18186e+07	1.61529e+07	1.72279e+07	7.32162e+07	2.76009e+08	8.52866e+07	1.04306e+07	2.57519e+07	1.75495e+06	8.80428e+06	309450	2.08659e+07	1.20371e+07	287116	2.37913e+07	1.88018e+07	4.47881e+07	959344	1.07838e+07	1.58659e+07	9.17207e+06	1.68396e+07	36302.6	129007	8.3223e+08
	High	[R].LPYSVVRNEQVEIR.[A]		1	12	P01024	P01024 [835-848]		1	1701.93	0	0.00223914	0.786702	0.0994483							320387	299058	32962.3	124176			2.08873e+06	1.00418e+07	2.94626e+06										502858		228495					1.09205e+06		3.34813e+07	2.12807e+06
	High	[K].NRWEDPGK.[Q]		1	91	P01024	P01024 [1218-1225]		1	1001.48	10	0.517655	0.990681	0.852076	1.94521e+07	1.70514e+07	2.41488e+07	1.23169e+07	2.97478e+08	8.93479e+06	2.72505e+07	1.41358e+07	8.29945e+06	1.30352e+07	1.27242e+07	3.73813e+06	2.78133e+07	1.20533e+08	5.50643e+07	7.84037e+06	8.87401e+06	1.05005e+07	3.05746e+06	1.80974e+06	2.90695e+06	4.76437e+06	3.72239e+06	1.60789e+07	3.24942e+07	2.77244e+07	4.59572e+06	9.80253e+06	2.45335e+07	8.21168e+06	8.57287e+06	3.01638e+07	1.44736e+07	2.72311e+10	1.0735e+08
	High	[R].NEQVEIR.[A]		1	404	P01024	P01024 [842-848]		0	887.458	18	0.881852	0.753224	0.519924	4.49429e+07	9.92466e+07	1.03364e+08	2.72638e+07	4.32002e+07	1.29012e+08	7.48272e+07	5.45264e+07	4.05946e+07	6.66061e+07	1.70041e+08	6.66134e+07	2.55569e+08	5.08124e+08	1.95608e+08	4.79832e+07	6.88204e+07	6.52269e+07	5.93801e+07	6.33477e+07	1.16208e+08	1.57984e+08	5.8311e+07	9.48848e+07	1.40616e+08	1.68068e+08	5.60376e+07	8.71418e+07	1.08311e+08	5.9521e+07	6.73499e+07	1.40633e+08	5.98154e+07	7.6524e+07	2.84523e+08
	High	[K].KLVLSSEK.[T]		1	101	P01024	P01024 [66-73]		1	903.551	2	0.804383	0.761281	0.877957	1.99425e+06	1.70791e+06	797245		2.31431e+07		3.9702e+06	4.69672e+06	2.50379e+06	3.87042e+06	3.26656e+06	1.49421e+06	9.21471e+06	3.04084e+07	1.08254e+07	2.05779e+06	3.41498e+06	1.00573e+06		249807	541755	536434		6.11141e+06	7.5352e+06	5.99105e+06	4.59219e+06	4.02673e+06	5.37533e+06	3.22723e+06	2.93081e+06	6.79615e+06	4.15327e+06	1.02956e+08	1.50694e+07
	High	[R].TLDPERLGR.[E]		1	43	P01024	P01024 [946-954]		1	1056.58	3	0.911254	0.467051	0.948534	7.24077e+07	7.33602e+07	6.79303e+07	5.72891e+07	1.05315e+08	5.82387e+07	2.42117e+07	2.35437e+07	1.90028e+07	2.17545e+07	2.08883e+07	2.13408e+07	8.87648e+07	2.25702e+08	1.15074e+08	2.0793e+07	4.4947e+07	3.53007e+07	2.80533e+07	2.86342e+07	3.93176e+07	5.27917e+07	4.0054e+07	3.66078e+07	4.35387e+07	5.5557e+07	2.17608e+07	2.54478e+07	3.38518e+07	2.75007e+07	2.33177e+07	3.22828e+07	3.34553e+07	2.88723e+08	8.80238e+07
	High	[R].MDRAHEAK.[I]	1xOxidation [M1]	1	58	P01024	P01024 [479-486]		1	973.452	1	0.428661	0.211807	0.805974	699996	541706	575498	330457	707539	742931	54051.9	24559	23745	29532.3	32408.8	37936.4	39708.2	193517	17470.4	16107.2	45243.7	100614	27099.6	132673	101503	445272	187822	30217.8	100384	54278.1	25566.1	56881.1	93432	59006.1	40621.8	78137.4	52083.9		95973.8
	High	[K].VVPEGIR.[M]		1	241	P01024	P01024 [931-937]		0	769.457	5	0.73505	0.544968	0.967365	1.58796e+08	1.12729e+08	1.16368e+08	1.2947e+08	3.15419e+08	1.47756e+08	4.84261e+07	4.14836e+07	3.1953e+07	5.31912e+07	4.8052e+07	4.37148e+07	1.17262e+08	3.7065e+08	1.74921e+08	4.09175e+07	6.31628e+07	6.42978e+07	4.79555e+07	4.97212e+07	6.96756e+07	9.08201e+07	3.84624e+07	7.99651e+07	8.60202e+07	8.25173e+07	3.97094e+07	5.59628e+07	6.83648e+07	5.83339e+07	5.13887e+07	6.6331e+07	5.52922e+07	4.16034e+09	2.03681e+08
	High	[K].GVFVLNK.[K]		1	43	P01024	P01024 [601-607]		0	776.466	3	0.685697	0.113212	3.66332e-17	301172			23112.5	923406		312708	349583	294662	124498	8677.99	64217.1	34766	1.43363e+06	85586.2	757509	206342	643336	852902	1.2137e+06	681542	534234	701924	106946	66924.4	34184.1	122293		23530.6	22716	13663.1	309253	485555	5.61498e+08	1.06025e+06
	High	[R].QPVPGQQMTLK.[I]	1xOxidation [M8]	1	34	P01024	P01024 [574-584]		0	1242.65	1	0.762789	0.917234	0.240209			291477				154224			230470		52445.9			2.03515e+06	185224						1.12664e+06		527223					192577
	High	[K].AAVYHHFISDGVR.[K]		1	3	P01024	P01024 [914-926]		0	1471.74	1	4.74369e-17	4.58126e-17	0.962612							350510	864595	175290																									4.10954e+06
	High	[K].RQGALELIK.[K]		1	56	P01024	P01024 [1042-1050]		1	1027.63	5	0.596215	9.61907e-05	0.323032		1.05976e+06		1.20841e+06	798185	1.1304e+06	1.11568e+07	1.21837e+07	944112	3.83699e+06	2.06828e+06		7.31551e+07	2.32256e+08	5.82495e+07		193155	300803	416618		526940			1.80582e+07	1.52701e+07	2.39473e+07	1.62075e+07	347553	9.67387e+06	2.26937e+06	6.17033e+06	1.8444e+07	1.18973e+07	7.50385e+08	7.92894e+07
	High	[R].AEDLVGK.[S]		1	16	P01024	P01024 [316-322]		0	731.393	5	0.969825	4.58126e-17	6.51003e-06	859358	470334	332301	389861																467176			528213										5.01373e+06	4.20565e+06
	High	[R].YYTYLIMNK.[G]		1	7	P01024	P01024 [489-497]		0	1208.6	0	0.629294	0.211302	0.588215	193418	297902	364703	495703	3.72815e+06	210819		195291					881937	3.82419e+06	745584	48920.5	146719	21145.8	139203	16259.9	47822.9	82692.9	51614.7		177403		49860.6		24560.7			139884		2.29967e+07	1.3173e+06
	High	[K].LVLSSEK.[TL]		1	230	P01024	P01024 [67-73]		0	775.456	9	0.750178	0.423252	0.952598	3.25898e+08	2.14995e+08	1.8849e+08	2.49852e+08	2.8248e+08	1.83625e+08	8.1971e+07	6.00324e+07	5.05208e+07	8.63162e+07	8.32788e+07	8.67039e+07	1.56848e+08	4.95996e+08	2.21101e+08	6.04473e+07	1.13882e+08	8.84065e+07	4.08134e+07	1.0376e+08	1.0669e+08	1.1777e+08	7.29872e+07	1.0099e+08	1.03658e+08	1.57642e+08	6.84083e+07	7.27672e+07	1.10094e+08	8.60428e+07	6.26913e+07	1.13449e+08	8.01256e+07	2.11407e+09	2.69793e+08
	High	[K].GPLLNK.[F]		1	62	P01024	P01024 [1204-1209]		0	641.398	2	0.905087	0.686134	0.56407	1.7662e+07	3.34305e+07	2.90177e+07	1.4911e+07	1.97091e+07	2.71369e+07	1.83674e+07	1.22654e+07	7.56238e+06	1.32186e+07	2.03955e+07	1.16538e+07	4.36394e+07	1.27885e+08	3.61979e+07	1.37231e+07	1.72994e+07	1.71527e+07	1.47284e+07	1.49283e+07	1.95666e+07	4.47349e+07	1.7432e+07	3.32766e+07	3.51986e+07	4.82053e+07	1.3804e+07	2.03832e+07	2.42853e+07	2.74324e+07	1.56626e+07	2.1119e+06	2.29291e+06	9.94182e+07	5.75139e+06
	High	[R].YISK.[Y]		1	70	P01024	P01024 [1428-1431]		0	510.292	5	0.699752	0.889689	0.93909	5.17465e+06	6.98609e+06	6.86402e+06	4.70708e+06	7.67665e+06	3.49718e+06	3.29835e+06	3.49608e+06	3.32439e+06	4.17538e+06	4.71022e+06	1.81699e+07	8.54971e+06	2.76475e+07	6.26467e+06	1.32908e+07	3.89098e+06	1.57539e+07	2.21754e+06	6.03363e+06	6.24307e+06	1.17945e+07	5.43371e+06	3.11753e+06	2.56777e+06	5.66118e+06	6.39677e+06	4.64308e+06	1.11071e+07	5.97362e+06	1.12038e+07	8.91042e+06	3.44181e+06	6.76281e+06	7.17854e+06
	High	[KRF].FDLK.[VP]		2	27	P01024; Q8WZ42-12	P01024 [1361-1364]; Q8WZ42-12 [1476-1479]; [7517-7520]; [8458-8461]		0	522.292	3	0.614259	0.280598	3.66332e-17							31775		31277	76666.9	38597.8		608157					146900		160196				203503			208802			90506.5		263304	1.90126e+07	1.70793e+08
	High	[K].WLILEK.[Q]		1	23	P01024	P01024 [1106-1111]		0	801.487	2	0.785056	0.671962	0.983146	1.00088e+06	1.67585e+06	1.58731e+06	115881	1.22026e+06	348686	92420.8	153048	106383	13295.6	133110	132528	640387	672715	948250	475336	94839.7	127708	206820	49433.1	163802	1.42509e+06	5.25798e+06	324958	357630	462186	95939	275246	214575	583028	352938	548550	438063		225746
	High	[K].QLANGVDR.[Y]		1	190	P01024	P01024 [1420-1427]		0	872.458	12	0.987624	0.782103	0.921569	9.76596e+06	6.20372e+06	6.95142e+06	2.6652e+06	1.6296e+08	1.14193e+07	8.05299e+07	5.73464e+07	3.23629e+07	3.24915e+07	5.76272e+07	1.82935e+07	4.23424e+07	9.26667e+07	6.60494e+07	2.87201e+07	2.6937e+07	2.20748e+07	1.42617e+07	1.89434e+07	3.99334e+07	4.70471e+07	1.6897e+07	5.60316e+07	7.95917e+07	3.42074e+07	4.46812e+07	4.29126e+07	5.9016e+07	4.20739e+07	4.25342e+07	3.61497e+07	3.85019e+07	1.22661e+07	5.98365e+07
	High	[R].FLYGK.[K]		1	68	P01024	P01024 [259-263]		0	627.35	6	0.820102	0.668822	0.992899	1.42358e+07	1.60981e+07	1.1422e+07	8.07929e+06	4.5159e+07	6.45369e+06	6.32376e+06	6.64603e+06	5.29165e+06	8.36019e+06	9.44818e+06	6.0964e+06	1.98462e+07	9.67891e+07	2.48203e+07	4.84024e+06	1.32014e+07	7.92201e+06	7.72153e+06	7.46547e+06	1.06727e+07	1.37154e+07	1.00041e+07	1.25864e+07	1.75964e+07	1.61232e+07	1.47634e+07	9.05589e+06	1.2616e+07	8.59592e+06	6.8818e+06	1.43882e+07	1.04023e+07	1.9349e+07	5.83621e+07
	High	[K].IRYYTYLIMNK.[G]	1xOxidation [M9]	1	1	P01024	P01024 [487-497]		1	1493.78	0
	High	[R].ISLPESLK.[R]		1	8	P01024	P01024 [282-289]		0	886.524	1	4.74369e-17	4.58126e-17	3.66332e-17		228831		257734		282666	8351.71		10685.5		13509.5																					3.47433e+07	1.78498e+07
	High	[K].YELDK.[A]		1	8	P01024	P01024 [1432-1436]		0	667.33	0	0.979258	0.994201	0.960588	2.90534e+06	4.96467e+06	2.90627e+06	2.26967e+06	6.51605e+06	540613		1.59296e+06	1.4223e+06		1.39101e+06	2.16724e+06	1.79694e+06	8.28535e+06	2.69067e+06	778732	1.68232e+06	1.4224e+06		1.13758e+06	2.42012e+06	2.35671e+06		1.66017e+06	2.19543e+06	3.08474e+06	3.00153e+06		2.19127e+06	3.32381e+06	1.52855e+06		2.08727e+06		2.9944e+06
	High	[R].AVLYNYR.[Q]		1	208	P01024	P01024 [849-855]		0	898.478	8	0.946538	0.883627	0.958241	8.68427e+07	9.76397e+07	9.61928e+07	8.10279e+07	2.27877e+08	6.5651e+07	3.94368e+07	3.87813e+07	3.09204e+07	3.87463e+07	4.102e+07	2.47194e+07	1.29729e+08	3.4544e+08	1.72101e+08	2.03223e+07	5.07913e+07	3.12671e+07	4.82256e+07	2.12067e+07	5.65171e+07	4.78994e+07	2.67642e+07	6.58168e+07	4.74555e+07	9.57311e+07	3.8322e+07	5.8925e+07	5.27547e+07	4.52126e+07	3.67259e+07	7.98467e+07	5.71687e+07	9.50756e+08	2.48989e+08
	High	[K].LMNIFLK.[D]	1xOxidation [M2]	1	7	P01024	P01024 [790-796]		0	894.512	0	0.818757	4.58126e-17	0.0519089			319549	141299		403877													144365	175895
	High	[R].LGREGVQK.[E]		1	18	P01024	P01024 [952-959]		1	886.51	0	0.881811	0.934014	0.550178								411451								140688	562660				260607			624253					394675					5.88344e+06
	High	[R].LPYSVVR.[N]		1	34	P01024	P01024 [835-841]		0	833.488	2	0.942852	0.94708	0.958204	3.10872e+07	3.86358e+07	3.1958e+07	3.14117e+07	1.8351e+08	1.59935e+07	1.13771e+07	1.33697e+07	5.1449e+06	7.11482e+06	1.00561e+07	8.09885e+06	7.53827e+07	2.57363e+08	1.1991e+08	7.96258e+06	2.0623e+07	7.43357e+06	6.60704e+06	1.3167e+07	1.78133e+07	1.52589e+07	1.02033e+07	2.38415e+07	5.99026e+07	6.73224e+07	1.62044e+07	1.21608e+07	1.70945e+07	1.32062e+07	1.26647e+07	4.17051e+07	1.68924e+07		1.62055e+08
	High	[R].IFTVNHK.[L]		1	280	P01024	P01024 [149-155]		0	858.483	8	0.926774	0.297293	0.964321	1.76996e+08	1.12744e+08	1.18353e+07	1.03738e+08	1.35419e+07	1.39475e+07	1.79833e+07	1.74164e+07	1.60504e+07	1.36473e+07	4.5226e+06	6.01214e+06	2.53225e+07	7.16388e+07	5.75836e+07	9.47318e+06	2.05201e+07	1.06196e+07	1.53122e+06	8.27328e+06	2.36537e+07	3.70375e+07	7.72602e+06	3.91381e+06	4.25116e+06	2.12706e+07	1.6566e+07	7.32763e+06	1.30653e+07	4.04855e+06	5.38662e+06	2.6058e+08	1.80997e+07	1.04024e+09	1.48771e+07
	High	[K].FGLEK.[R]		1	37	P01024	P01024 [1037-1041]		0	593.329	2	0.85813	0.889689	0.977883	2.90586e+06	2.48995e+06	3.41728e+06	1.34892e+06	1.13518e+06	3.48226e+06	790434	1.56256e+06	638994	1.56529e+06	555664	996441	2.30588e+06	4.44748e+06	2.86547e+06	532422	919669	712142	1.04049e+06	473863	31512.6	1.45781e+06	1.36737e+06	1.13298e+06	1.24527e+06	4.31967e+06	470587	700349	698703	2.50636e+06	1.21278e+06	1.57159e+06	1.79443e+06	72195.8	2.4606e+06
	High	[R].APSTWLTAYVVK.[V]		1	2	P01024	P01024 [1073-1084]		0	1335.73	0
	High	[K].DQLTCNK.[F]	1xCarbamidomethyl [C5]	1	63	P01024	P01024 [1354-1360]		0	878.404	1	0.586286	4.58126e-17	0.934482	3.37554e+06	2.35253e+06	2.17747e+06	610490	3.84343e+06	1.43583e+06														935635
	High	[K].LLPVGR.[T]		1	27	P01024	P01024 [156-161]		0	654.43	2	0.425853	0.946632	0.665856	1.08415e+06	2.44359e+06	993497	1.61012e+06		604245	1.67204e+06	1.24961e+06	590149	657238	434588	324753				285360		135403			458001					1.12014e+06		2.02492e+06		1.0156e+06	1.47323e+06	751517		2.94204e+07
	High	[K].ITHR.[I]		1	3	P01024	P01024 [1307-1310]		0	526.31	0			3.66332e-17																																	8879.4		42881.6
	High	[R].WLNEQR.[Y]		1	256	P01024	P01024 [1255-1260]		0	845.426	4	0.97518	0.913062	0.471181	2.78044e+07	2.04869e+07	1.39073e+07	1.21364e+07	4.11373e+07	1.17004e+07	1.33173e+07	1.20489e+07	1.17146e+07	1.61219e+07	1.58406e+07	6.46997e+06	4.16778e+06	1.61447e+07	4.03982e+07	5.76004e+06	1.50332e+07	1.4386e+07	1.59143e+07	7.33364e+06	1.03529e+06	1.6341e+07	6.73494e+06	2.8608e+07	1.78489e+06	3.33065e+07	1.49725e+07	1.31471e+07	2.84358e+07	1.59258e+07	1.42627e+07	1.27997e+06	3.72841e+06	2.59375e+07	4.06713e+07
	High	[K].PLSITVR.[T]		1	7	P01024	P01024 [419-425]		0	785.488	0	0.166807	4.58126e-17	0.0044554	4.6242e+06	7.69419e+06	5.01939e+06		7.5701e+06	8.40197e+06										1.1922e+06	1.90322e+06			1.04551e+07		1.98628e+06	2.52163e+06	15558.8	10972.2		5367.6	35560.6	15325.8	14387.4	10204.4	8105.17		7.51228e+06
	High	[K].SLYVSATVILHSGSDMVQAER.[S]		1	3	P01024	P01024 [323-343]		0	2263.14	0	0.506573	0.268325	0.460255		270074	542550										104486	75472.3	188526											162175	27695.7	88683.7	87505		11878.9
	High	[R].QNQELK.[V]		1	3	P01024	P01024 [856-861]		0	759.4	0
	High	[K].CREALK.[L]	1xCarbamidomethyl [C1]	1	27	P01024	P01024 [1590-1595]		1	776.408	3	0.366999	4.58126e-17	0.458081	1.45411e+06			2.88065e+06	468718	3.00519e+06	843483		480324		729327					329188		6.94834e+06		5.57661e+06	765388	1.36953e+06	5.76766e+06											7.08228e+07	310467
	High	[R].FISLGEACKK.[V]	1xCarbamidomethyl [C8]	1	2	P01024	P01024 [713-722]		1	1152.61	0	0.92594	0.989704	0.538098			877206	750102	6.15597e+06		1.06151e+06	1.04109e+06	338741	440092	364689	184943	2.27234e+06	3.75556e+06	5.41085e+06	163394	860055	159344			446553			819373	2.17993e+06	1.53053e+06	667439	382720	1.0147e+06	507953	608997	1.81369e+06	902795	1.69962e+07	6.77694e+06
	High	[K].TVAVR.[T]		1	2	P01024	P01024 [941-945]		0	545.341	0
	High	[R].FSCQRR.[T]	1xCarbamidomethyl [C3]	1	20	P01024	P01024 [705-710]		1	853.41	1			3.66332e-17																																		5.46793e+07
	High	[R].ILLQGTPVAQMTEDAVDAERLK.[H]		1	1	P01024	P01024 [980-1001]		1	2398.26	0			3.66332e-17																																	229528
	High	[K].GRLLK.[A]		1	3	P01024	P01024 [498-502]		1	586.404	0
	High	[R].PQDAK.[N]		1	1	P01024	P01024 [1377-1381]		0	558.288	0	4.74369e-17		3.66332e-17																				326521			552808
	High	[R].QGALELIK.[K]		1	1	P01024	P01024 [1043-1050]		0	871.525	0
	High	[R].NNNEK.[D]		1	1	P01024	P01024 [1135-1139]		0	618.284	0
	High	[K].SDDK.[V]		1	3	P01024	P01024 [1523-1526]		0	464.199	0	4.74369e-17	4.58126e-17	0.102836								2.42809e+06
	High	[K].AFSDR.[N]		1	2	P01024	P01024 [1437-1441]		0	595.283	0	0.995958	0.971527	0.92306		2.14532e+06				2.58165e+06	1.05048e+06	703628	845401		949201					813974	539898			944161		1.89049e+06	966723		898275			846161		486602
	High	[R].RHQQTVTIPPK.[S]		1	1	P01024	P01024 [881-891]		1	1304.74	0
	High	[R].ENPMR.[F]		1	1	P01024	P01024 [700-704]		0	646.298	1	0.871704	0.998843	0.921879		1.76661e+06			1.06321e+06		1.1258e+06	352332		594751	500952			2.89998e+06		368879	388484	438091	529234	1.13639e+06		514541		402462	783577		656175	2.10441e+06	786088	606623	833578	721151
	High	[R].YRGDQDATMSILDISMMTGFAPDTDDLK.[Q]	3xOxidation [M9; M16; M17]	1	2	P01024	P01024 [1392-1419]		1	3155.39	0
	High	[K].CCEDGMRENPMR.[F]	2xCarbamidomethyl [C1; C2]; 2xOxidation [M6; M11]	1	75	P01024	P01024 [693-704]		1	1586.58	3	0.874316	0.093532	0.0139598	149520		117331	1.84815e+06	319818							18063.4	2.20136e+06	1.19911e+07	3.40713e+06	158279				360585		21304.1			931266	1.22915e+06			42652			1.41313e+06	222526	2.58941e+07	1.91162e+06
	High	[K].VFLDCCNYITELRR.[Q]	2xCarbamidomethyl [C5; C6]	1	1	P01024	P01024 [723-736]		1	1858.89	0	4.74369e-17	4.58126e-17	0.815598			3572.17		7304.64	2476.73				179157																						1392.18			4677.2
P02671-1	FGA	Fibrinogen alpha chain [OS=Homo sapiens]	n/a	High		0	65	26646	81	866	94.9	6.01	17519.4	cell organization and biogenesis;coagulation;defense response;metabolic process;regulation of biological process;response to stimulus;transport	cell surface;extracellular;membrane;organelle lumen	metal ion binding;protein binding;structural molecule activity	Pf00147, Pf02414, Pf08702, Pf12160	2243	4	ENSG00000171560.14	Platelet activation; Complement and coagulation cascades	Post-translational protein phosphorylation; Integrin cell surface interactions; Regulation of Insulin-like Growth Factor (IGF) transport and uptake by Insulin-like Growth Factor Binding Proteins (IGFBPs); Signaling by BRAF and RAF fusions; Amyloid fiber formation; MAP2K and MAPK activation; GRB2:SOS provides linkage to MAPK signaling for Integrins ; Signaling by RAS mutants; Signaling by high-kin…	Blood Clotting Cascade; VEGFA-VEGFR2 Signaling Pathway	42	0	1.22417e+10	7.34823e+09	4.73098e+09	4.67046e+09	1.24766e+10	5.46232e+09	3.081e+09	3.66754e+09	4.11637e+09	3.44708e+09	4.95166e+09	2.36703e+09	6.64703e+09	1.27333e+10	7.97285e+09	3.93546e+09	6.33619e+09	3.73209e+09	3.17831e+09	2.4859e+09	4.50179e+09	6.77861e+09	3.15746e+09	6.04947e+09
	Confidence	Annotated Sequence	Modifications	# Protein Groups	# PSMs	Master Protein Accessions	Positions in Master Proteins	Modifications in Master Proteins	# Missed Cleavages	Theo. MH+ [Da]	# Razor Quan Results	Abundance Ratio Adj. P-Value: (CP, Sample) / (Control, Control)	Abundance Ratio Adj. P-Value: (IPMN, Sample) / (Control, Control)	Abundance Ratio Adj. P-Value: (PA, Sample) / (Control, Control)	Abundances (Normalized): F1: Control, Control, Patient01	Abundances (Normalized): F2: Control, Control, Patient02	Abundances (Normalized): F3: Control, Control, Patient03	Abundances (Normalized): F4: Control, Control, Patient04	Abundances (Normalized): F5: Control, Control, Patient05	Abundances (Normalized): F6: Control, Control, Patient06	Abundances (Normalized): F7: Control, Control, Patient07	Abundances (Normalized): F8: Control, Control, Patient08	Abundances (Normalized): F9: Control, Control, Patient09	Abundances (Normalized): F10: Control, Control, Patient10	Abundances (Normalized): F11: Control, Control, Patient11	Abundances (Normalized): F12: Sample, CP, Patient12	Abundances (Normalized): F13: Sample, CP, Patient13	Abundances (Normalized): F14: Sample, CP, Patient14	Abundances (Normalized): F15: Sample, CP, Patient15	Abundances (Normalized): F16: Sample, CP, Patient16	Abundances (Normalized): F17: Sample, CP, Patient17	Abundances (Normalized): F18: Sample, CP, Patient18	Abundances (Normalized): F19: Sample, CP, Patient19	Abundances (Normalized): F20: Sample, CP, Patient20	Abundances (Normalized): F21: Sample, CP, Patient21	Abundances (Normalized): F22: Sample, CP, Patient22	Abundances (Normalized): F23: Sample, CP, Patient23	Abundances (Normalized): F24: Sample, IPMN, Patient24	Abundances (Normalized): F25: Sample, IPMN, Patient25	Abundances (Normalized): F26: Sample, IPMN, Patient26	Abundances (Normalized): F27: Sample, IPMN, Patient27	Abundances (Normalized): F28: Sample, IPMN, Patient28	Abundances (Normalized): F29: Sample, IPMN, Patient29	Abundances (Normalized): F30: Sample, IPMN, Patient30	Abundances (Normalized): F31: Sample, IPMN, Patient31	Abundances (Normalized): F32: Sample, PA, Patient32	Abundances (Normalized): F33: Sample, PA, Patient33	Abundances (Normalized): F34: Sample, PA, Patient34	Abundances (Normalized): F35: Sample, PA, Patient35
	High	[K].PGSSGPGSTGSWNSGSSGTGSTGNQNPGSPRPGSTGTWNPGSSER.[G]		1	25	P02671-1	P02671-1 [323-367]		0	4232.85	0	0.613049	0.957378	0.631662	332676			181561		243404		153665	204763	43038.8			772977	1.16576e+06		80828.2	853621				231458	313377		295253	39885.6				1.27285e+06	180085		398656		4.06785e+06
	High	[R].GGSTSYGTGSETESPRNPSSAGSWNSGSSGPGSTGNRNPGSSGTGGTATWK.[P]		1	12	P02671-1	P02671-1 [272-322]		2	4819.11	0			3.66332e-17
	High	[R].NPSSAGSWNSGSSGPGSTGNRNPGSSGTGGTATWK.[P]		1	14	P02671-1	P02671-1 [288-322]		1	3265.45	0	0.482899	0.980676	0.923424	713737	191966			1.11118e+06	172647		238847	96426.8							23247.9	148992						38500.9	173152	186295			119140	262851				325679		1.23263e+06
	High	[K].MADEAGSEADHEGTHSTK.[R]		1	1803	P02671-1	P02671-1 [603-620]		0	1872.77	33	0.963818	0.811674	0.947537	1.25818e+09	4.47028e+08	2.21033e+08	3.75238e+08	1.26508e+08	4.69313e+08	1.24981e+08	1.70553e+08	2.3975e+08	1.74614e+08	3.11122e+08	1.25966e+08	4.02537e+08	9.98255e+08	3.11579e+08	1.91901e+08	2.22544e+08	2.7281e+08	1.46911e+08	1.24941e+08	2.07364e+08	4.57886e+08	1.96631e+08	3.63312e+08	3.62402e+08	4.1066e+08	1.73334e+08	1.50381e+08	6.75868e+08	1.35489e+08	2.6328e+08	4.29637e+08	2.84291e+08	5.24509e+09	7.91089e+08
	High	[R].GGSTSYGTGSETESPRNPSSAGSWNSGSSGPGSTGNR.[N]		1	46	P02671-1	P02671-1 [272-308]		1	3517.51	1	4.74369e-17	0.571191	0.780012	692430					688110			14278		77137.8																		68160.5			329849
	High	[K].MADEAGSEADHEGTHSTK.[R]	1xOxidation [M1]	1	2136	P02671-1	P02671-1 [603-620]		0	1888.76	50	0.333594	0.82277	0.138127	1.54198e+08	5.42805e+07	5.54152e+07	3.85787e+07	2.43434e+07	1.59414e+08	8.22982e+07	6.63973e+07	1.77887e+08	1.83122e+07	9.85137e+07	2.62479e+07	7.31877e+07	2.3244e+08	1.0459e+08	1.33698e+08	9.24343e+07	1.19037e+08	2.57512e+07	9.44305e+07	1.13197e+08	1.40757e+08	1.15241e+08	5.04597e+07	4.4414e+07	5.32349e+07	2.83219e+07	7.86249e+07	8.04531e+07	3.57805e+07	3.77461e+07	5.46877e+07	4.46857e+07	7.18777e+08	9.03793e+07
	High	[K].QFTSSTSYNRGDSTFESK.[S]		1	764	P02671-1	P02671-1 [582-599]		1	2041.91	22	0.993148	0.915679	0.978102	2.47217e+08	1.38269e+08	6.99193e+07	8.64939e+07	2.43086e+08	8.03334e+07	3.60698e+07	4.7365e+07	5.78444e+07	6.01466e+07	7.82014e+07	4.36152e+07	1.35957e+08	1.44824e+08	1.62055e+08	6.45413e+07	1.15738e+08	5.24383e+07	4.74318e+07	2.86506e+07	6.21915e+07	1.04845e+08	3.78481e+07	8.35809e+07	1.22685e+08	1.56197e+08	8.55978e+07	9.21663e+07	1.97116e+08	5.60521e+07	7.00434e+07	1.09348e+08	8.25097e+07	9.37662e+08	3.34088e+08
	High	[R].HPDEAAFFDTASTGK.[T]		1	186	P02671-1	P02671-1 [513-527]		0	1593.72	6	0.648673	0.877168	0.718986	5.30296e+06	3.48309e+06	3.4234e+06	1.95479e+06	2.82041e+06	1.75288e+06	1.17677e+06	1.83825e+06	529588	793514	860507	526030	4.1186e+06	4.17405e+06	3.91347e+06	1.26171e+06	2.63252e+06	3.89713e+06	5.45629e+06	632053	6.44736e+06	4.95613e+06	1.14498e+06	2.52006e+06	4.41837e+06	2.73075e+06	6.26483e+06	1.16968e+06	3.29287e+06	1.59119e+06	1.21047e+06	6.01753e+06	1.66785e+06	4.52058e+07	1.82235e+07
	High	[R].NPSSAGSWNSGSSGPGSTGNR.[N]		1	434	P02671-1	P02671-1 [288-308]		0	1963.85	2	0.942852	0.928083	0.980625	2.04859e+07	7.03592e+06	4.42241e+06	6.14276e+06	1.45784e+07	8.00072e+06	2.58655e+06	2.8158e+06	5.06157e+06	2.42956e+06	7.54627e+06	3.09165e+06	4.78867e+06	1.22409e+07	8.08741e+06	3.26101e+06	5.39483e+06	4.08402e+06	2.4902e+06	4.47587e+06	4.16235e+06	5.6658e+06	2.1571e+06	5.24944e+06	5.41624e+06	6.0471e+06	475211	4.3822e+06	1.11397e+07	2.85823e+06	4.60797e+06	5.32486e+06	4.45658e+06	4.56052e+07	1.09709e+07
	High	[R].PNNPDWGTFEEVSGNVSPGTRR.[E]		1	3	P02671-1	P02671-1 [405-426]		1	2416.13	0			3.66332e-17																																		4.30329e+06	637810
	High	[K].PGSSGPGSTGSWNSGSSGTGSTGNQNPGSPR.[P]		1	7	P02671-1	P02671-1 [323-353]		0	2819.22	0			3.66332e-17
	High	[K].GLIDEVNQDFTNRINK.[L]		1	395	P02671-1	P02671-1 [72-87]		1	1875.96	11	0.955148	0.958702	0.803936	5.66894e+06	3.52221e+06	1.57737e+06	4.33579e+06	9.75292e+06	7.15306e+06	79843.9	378722	183379	565063	1.02939e+06	2.87391e+06	2.92857e+06	9.64684e+06	1.60811e+06	808131	7.72761e+06	2.29769e+06	1.82764e+06	1.93987e+06	447340	807852	1.86513e+06	3.44503e+06	1.5168e+06	3.66306e+06	945512	1.00407e+06	3.07213e+06	1.30225e+06	1.96775e+06	1.39917e+06	1.70436e+06	8.82703e+07	6.37989e+06
	High	[K].ESSSHHPGIAEFPSR.[G]		1	497	P02671-1	P02671-1 [559-573]		0	1637.77	20	0.779127	0.763756	0.890563	1.14406e+08	1.04653e+08	9.94747e+07	8.03212e+07	3.43695e+08	1.32876e+08	5.27542e+07	6.4471e+07	3.54786e+07	5.72057e+07	5.40324e+07	2.19165e+07	1.74123e+08	3.89327e+08	2.20151e+08	3.23971e+07	8.96273e+07	4.77297e+07	4.72468e+07	3.49912e+07	4.30224e+07	7.20303e+07	4.59516e+07	1.16921e+08	1.00129e+08	1.46781e+08	1.20347e+08	7.15865e+07	1.26953e+08	8.85849e+07	7.22374e+07	9.07621e+07	7.82222e+07	1.78958e+09	3.19596e+08
	High	[K].EVVTSEDGSDCPEAMDLGTLSGIGTLDGFR.[H]	1xCarbamidomethyl [C11]; 1xOxidation [M15]	1	340	P02671-1	P02671-1 [481-510]		0	3144.4	12	0.988808	0.869845	0.927448	1.31555e+07	4.0857e+06	1.75112e+06	2.95009e+06	3.83062e+06	1.91943e+06	164169	160053	320276	226960	1.15572e+06	706496	2.68302e+06	2.20599e+06	2.24076e+06	1.68029e+06	4.42794e+06	1.6387e+06	1.40794e+06	845131	1.25253e+06	2.76412e+06	1.62138e+06	814460	1.87023e+06	1.42387e+06	632561	968186	1.86499e+06	970745	1.79445e+06	1.0783e+06	1.66674e+06	3.023e+07	2.5586e+06
	High	[R].PGSTGTWNPGSSER.[G]		1	133	P02671-1	P02671-1 [354-367]		0	1432.65	5	0.961027	0.998688	0.880234	8.52057e+06	4.17326e+06	5.97318e+06	4.36666e+06	8.82518e+06	5.83253e+06	2.41228e+06	3.02875e+06	2.94116e+06	2.79079e+06	3.49251e+06	2.61595e+06	4.24815e+06	1.35208e+07	7.97296e+06	1.96786e+06	3.49649e+06	3.07804e+06	1.08383e+06	2.66579e+06	2.2564e+06	4.79019e+06	4.6693e+06	4.08478e+06	5.13715e+06	5.07265e+06	1.57252e+06	4.0401e+06	6.28622e+06	4.54091e+06	3.51952e+06	5.31171e+06	4.43485e+06	3.38357e+07	1.36113e+07
	High	[K].MADEAGSEADHEGTHSTKR.[G]		1	2	P02671-1	P02671-1 [603-621]		1	2028.87	0		4.58126e-17	3.66332e-17																										97735.9									244654
	High	[K].TFPGFFSPMLGEFVSETESR.[G]	1xOxidation [M9]	1	58	P02671-1	P02671-1 [528-547]		0	2281.05	1	0.942852	0.951604	0.288703	4.23296e+06	990498		324949	604286					365017			672608			364482								304272	776531		93890.6		841039			688658		7.13024e+06
	High	[R].GGSTSYGTGSETESPR.[N]		1	821	P02671-1	P02671-1 [272-287]		0	1572.68	7	0.892015	0.945984	0.626881	6.91244e+08	2.00703e+08	1.36579e+08	1.57668e+08	4.43198e+08	2.05142e+08	9.05058e+07	7.0547e+07	1.14132e+08	8.56795e+07	1.77168e+08	8.99342e+07	1.18235e+08	2.3181e+08	1.74991e+08	9.97494e+07	1.38177e+08	1.04754e+08	9.17527e+07	9.66038e+07	1.08254e+08	1.57292e+08	7.84101e+07	1.64087e+08	1.7571e+08	1.77344e+08	1.84223e+08	1.34221e+08	2.89187e+08	9.24956e+07	1.48925e+08	1.79787e+08	9.44417e+07	1.69759e+09	3.09578e+08
	High	[R].GDFSSANNRDNTYNR.[V]		1	1327	P02671-1	P02671-1 [115-129]		1	1730.75	33	0.981786	0.994201	0.96515	1.59498e+09	3.98498e+08	4.25716e+08	3.59432e+08	1.3806e+09	2.60674e+08	2.09717e+08	1.94755e+08	2.39728e+08	2.07e+08	3.93219e+08	1.98883e+08	3.20796e+08	7.55114e+08	5.10847e+08	3.09665e+08	3.90887e+08	2.32518e+08	1.82149e+08	1.70424e+08	2.58757e+08	4.84877e+08	1.79397e+08	2.77711e+08	4.72791e+08	4.12568e+08	4.09697e+08	2.40012e+08	6.48649e+08	1.82363e+08	3.0209e+08	4.22062e+08	2.49592e+08	3.81715e+09	8.96531e+08
	High	[K].DSHSLTTNIMEILR.[G]	1xOxidation [M10]	1	692	P02671-1	P02671-1 [101-114]		0	1645.82	12	0.990886	0.696679	0.974193	3.0146e+07	2.31915e+07	1.16263e+07	1.32171e+07	1.79436e+07	2.26487e+07	817236	1.76361e+06	1.74485e+06	2.67576e+06	1.05451e+07	1.06926e+07	4.73612e+07	8.08336e+07	1.49355e+07	4.19757e+06	4.8672e+07	7.97748e+06	1.87948e+07	3.40037e+06	4.92293e+06	3.39346e+06	6.47959e+06	1.37978e+07	1.56971e+07	2.83817e+07	6.05678e+06	2.19918e+07	2.28806e+07	9.09327e+06	1.81183e+07	1.09604e+07	1.86101e+07	2.75662e+08	8.87208e+06
	High	[K].MKPVPDLVPGNFK.[S]	1xOxidation [M1]	1	933	P02671-1	P02671-1 [226-238]		0	1457.78	41	0.815478	0.804953	0.957302	4.3105e+07	2.51452e+07	3.96051e+07	3.61589e+07	1.1672e+08	1.22377e+07	6.37833e+06	1.70344e+07	6.3443e+06	7.98095e+06	5.04902e+06	5.43959e+06	3.32036e+07	8.49558e+07	1.42935e+07	1.66194e+06	5.69324e+07	2.56229e+06	2.43387e+07	1.85901e+06	2.47641e+06	6.89114e+06	1.34104e+07	2.19101e+07	4.17433e+07	4.01725e+07	3.1396e+07	1.19581e+07	1.68127e+07	2.09839e+07	1.221e+07	1.75625e+07	1.53604e+07	3.65452e+08	4.93125e+07
	High	[K].DSDWPFCSDEDWNYK.[C]	1xCarbamidomethyl [C7]	1	286	P02671-1	P02671-1 [49-63]		0	1963.74	5	0.864653	0.433958	0.893724	5.36982e+06	1.99163e+06	818790	1.00946e+06	3.64904e+06	712187	32982.7	78040.3	73511.8	93047.1	165010	112409	2.57904e+06	4.28034e+06	1.57009e+06	277637	638029	270961	362134	143308	829528	729661	268144	224468	339761	659623	75741	185288	584966	414167	138829	286632	248932	3.36161e+07	2.12373e+06
	High	[K].GLIDEVNQDFTNR.[I]		1	1413	P02671-1	P02671-1 [72-84]		0	1520.73	21	0.742875	0.853976	0.0159175	4.71302e+07	4.57535e+07	2.50744e+07	2.39999e+07	1.28354e+08	2.51461e+07	2.52707e+06	3.35151e+06	6.44673e+06	1.15896e+07	1.80456e+07	1.16165e+07	8.56127e+07	1.30596e+08	8.81734e+07	1.3517e+07	5.29005e+07	1.64592e+07	1.96332e+07	3.12741e+07	2.48319e+07	3.33078e+07	2.65765e+07	2.76843e+07	1.87971e+07	5.3598e+07	9.0679e+06	1.05981e+07	1.40039e+07	1.3429e+07	1.96234e+07	4.4587e+07	2.08682e+07	7.51932e+08	1.71331e+08
	High	[R].NPGSSGTGGTATWK.[P]		1	307	P02671-1	P02671-1 [309-322]		0	1320.62	10	0.762698	0.730208	0.900112	1.98619e+08	6.51111e+07	5.50901e+07	5.2072e+07	1.17847e+08	6.08365e+07	2.05146e+07	2.26434e+07	2.86871e+07	1.83096e+07	4.83152e+07	2.43877e+07	6.55982e+07	1.03665e+08	8.08614e+07	3.12014e+07	4.06631e+07	2.39333e+07	1.57533e+07	2.02979e+07	3.06701e+07	4.35826e+07	1.9254e+07	3.20071e+07	4.89578e+07	5.27998e+07	1.02983e+07	3.35095e+07	7.06007e+07	2.72593e+07	3.44773e+07	5.30936e+07	2.8e+07	8.07091e+08	1.15301e+08
	High	[K].DSHSLTTNIMEILR.[G]		1	13	P02671-1	P02671-1 [101-114]		0	1629.83	0	0.817052	0.912995	0.513636		417659		75883.5	23684.6	116777			29553.4	108851					188770									105519	22630.1		1.49999e+06	86615.3	35654.6		38482.4		61132.9
	High	[R].DCDDVLQTHPSGTQSGIFNIK.[L]	1xCarbamidomethyl [C2]	1	4	P02671-1	P02671-1 [631-651]		0	2332.09	0
	High	[K].VQHIQLLQK.[N]		1	553	P02671-1	P02671-1 [149-157]		0	1106.67	19	0.222047	0.267355	0.779477	8.95935e+07	7.37923e+07	5.49456e+07	4.14956e+07	4.07968e+08	4.14572e+07	6.1128e+07	7.83203e+07	6.19567e+07	6.03284e+07	6.74989e+07	1.77836e+07	1.42579e+07	2.11819e+07	2.57532e+07	3.00919e+07	4.24477e+07	1.73427e+07	2.77674e+07	9.41924e+06	1.49174e+08	4.84157e+07	2.21504e+07	9.42802e+07	1.29159e+08	1.26033e+08	1.27631e+08	7.94563e+07	1.38327e+08	6.07416e+07	1.50896e+08	1.15448e+08	7.69767e+07	1.82813e+09	4.52971e+08
	High	[K].ESSSHHPGIAEFPSRGK.[S]		1	11	P02671-1	P02671-1 [559-575]		1	1822.88	1	4.74369e-17	4.58126e-17	3.66332e-17													852823	1.88191e+06													2.73572e+06							2.75632e+07
	High	[R].VVERHQSACK.[D]	1xCarbamidomethyl [C9]	1	75	P02671-1	P02671-1 [39-48]		1	1213.61	4	0.813809	0.999895	0.00217311	58102.9	35820.4	525671				924325	283223	312769	123153	239201	9925.2		654884		282687	330923			1.92242e+06	650567	1.10355e+07	306884		561623		566133	143233	317548	216315	12261.5	570250	1.76614e+06	8.86161e+06	616895
	High	[R].GSESGIFTNTK.[E]		1	762	P02671-1	P02671-1 [548-558]		0	1140.55	39	0.938153	0.897124	0.830559	8.30189e+08	7.03406e+08	2.53975e+08	3.50735e+08	7.66261e+08	2.98315e+08	1.22616e+08	2.30175e+08	2.36592e+08	2.16749e+08	2.93072e+08	1.81167e+08	4.61924e+08	1.24892e+09	7.65119e+08	2.64149e+08	4.64925e+08	2.2947e+08	2.27213e+08	1.43486e+08	2.91869e+08	3.57387e+08	2.13062e+08	5.49033e+08	3.40437e+08	5.67442e+08	3.12873e+08	3.42996e+08	4.63287e+08	2.39194e+08	2.80024e+08	2.91567e+08	3.23994e+08	2.84256e+09	6.42563e+08
	High	[K].TVIGPDGHK.[E]		1	1201	P02671-1	P02671-1 [468-476]		0	923.495	35	0.991418	0.853099	0.95993	6.16491e+08	1.00811e+09	6.70829e+08	2.74043e+08	2.65719e+08	8.56912e+08	5.13917e+08	5.11115e+08	6.74892e+08	6.1517e+08	9.20242e+08	2.5949e+08	2.67727e+08	1.09037e+08	7.13938e+07	6.73893e+08	8.77023e+08	5.94211e+08	5.83888e+08	3.59452e+08	5.89866e+08	1.079e+09	4.23776e+08	9.91286e+08	1.34877e+09	7.61845e+07	8.05213e+08	5.51557e+08	1.44292e+09	4.44397e+08	7.14544e+08	1.09821e+09	7.81231e+08	2.24796e+09	2.27982e+08
	High	[R].MELERPGGNEITR.[G]		1	412	P02671-1	P02671-1 [259-271]		0	1501.74	14	0.000433698	0.763341	0.0590585	4.48541e+08	3.01368e+08	1.43808e+08	1.5477e+08	6.09449e+08	1.22891e+08	7.44402e+07	1.11384e+08	1.06908e+08	1.00832e+08	1.4596e+08	6.20978e+06	8.79687e+07	1.35861e+08	1.44739e+08	1.79475e+07	5.16778e+07	1.73567e+07	1.25918e+07	5.08665e+06	2.52393e+07	4.6033e+07	1.12893e+07	2.56785e+08	2.16652e+08	2.84281e+08	1.46863e+08	1.73312e+08	3.19708e+08	1.15973e+08	1.57635e+08	2.02351e+08	1.64753e+08	6.69411e+08	6.27496e+08
	High	[K].QFTSSTSYNR.[G]		1	535	P02671-1	P02671-1 [582-591]		0	1190.54	16	0.959895	0.947926	0.713151	3.05521e+08	9.59566e+07	5.46692e+07	8.31615e+07	1.88507e+08	8.23013e+07	4.32976e+07	4.63421e+07	5.58511e+07	4.36499e+07	6.04776e+07	3.10906e+07	6.46305e+07	9.3811e+07	9.81373e+07	3.94042e+07	7.18837e+07	4.27946e+07	3.20141e+07	3.35942e+07	4.82522e+07	7.1852e+07	3.43863e+07	7.52487e+07	6.20086e+07	8.55661e+07	6.34675e+07	5.22773e+07	1.03687e+08	5.02053e+07	6.58672e+07	7.01133e+07	4.74461e+07	5.93363e+08	1.36615e+08
	High	[R].GDFSSANNRDNTYNRVSEDLR.[S]		1	41	P02671-1	P02671-1 [115-135]		2	2430.1	1	0.00300272	0.573223	0.962612					8.0856e+06		1.4242e+06	1.9329e+06	329356	835269	873271		7.59987e+06	1.59398e+07	9.60137e+06		563228				279326			2.94096e+06	3.47413e+06	1.93578e+06	6.78764e+06		2.24492e+06		1.34662e+06	1.87963e+06	1.44361e+06	1.00074e+08	1.42713e+07
	High	[R].GDSTFESK.[S]		1	89	P02671-1	P02671-1 [592-599]		0	870.384	7	4.74369e-17	4.58126e-17	0.789125	320335	2.0679e+06				2.03445e+06																										407447		1.40122e+07
	High	[K].QLEQVIAK.[D]		1	751	P02671-1	P02671-1 [203-210]		0	928.546	30	0.868183	0.982259	0.894921	1.46585e+09	9.61425e+08	5.88973e+08	7.36112e+08	1.66461e+09	5.90236e+08	2.68164e+08	3.77007e+08	4.17158e+08	4.06816e+08	4.94888e+08	4.07449e+08	8.31814e+08	1.2847e+09	9.90004e+08	5.52283e+08	9.37963e+08	4.76683e+08	4.65962e+08	2.99236e+08	6.79834e+08	1.0466e+09	4.44048e+08	7.1378e+08	6.34855e+08	7.77896e+08	5.5451e+08	5.3962e+08	1.13838e+09	4.68637e+08	5.17148e+08	6.36389e+08	4.73572e+08	5.72764e+09	1.43722e+09
	High	[K].VTSGSTTTTRR.[S]		1	191	P02671-1	P02671-1 [449-459]		1	1166.61	8	4.74369e-17	0.0618874	3.66332e-17	78718.5		36032.5		39164.5																				684186	180647								2.93706e+07
	High	[K].NSLFEYQK.[N]		1	496	P02671-1	P02671-1 [90-97]		0	1028.5	22	0.230282	0.0745613	0.0779902	9.86661e+07	6.8502e+07	3.11436e+07	4.72474e+07	4.35653e+07	7.4024e+07	7.17582e+06	6.74239e+06	5.06042e+06	1.08134e+07	9.01312e+06	9.27641e+06	5.41407e+07	1.17992e+08	7.22874e+07	9.93614e+06	2.60876e+07	1.44802e+07	3.72898e+07	6.07924e+07	1.20303e+08	9.10579e+07	5.87617e+07	1.12526e+07	8.59752e+06	1.18047e+07	9.34164e+06	7.78637e+06	1.01491e+07	6.09551e+06	5.87546e+06	3.50925e+07	3.34442e+07	3.10893e+09	9.97395e+07
	High	[K].MKPVPDLVPGNFK.[S]		1	94	P02671-1	P02671-1 [226-238]		0	1441.79	0	0.00863622	0.113465	0.0232862	5.21714e+06	7.03869e+06	1.803e+06	3.73878e+06	3.87757e+06	4.0367e+06	245441	426799	267378	431608	108578	44248.1	736279	4.6632e+06	388583	123412	165606	113674	94314.2	184935	186821	84126.5	123196	421325	410412	128918	794126	133894	62421.3	673054	421284	137462	438652	3.42237e+07	1.0316e+06
	High	[R].MELERPGGNEITR.[G]	1xOxidation [M1]	1	1405	P02671-1	P02671-1 [259-271]		0	1517.74	60	0.773648	0.724769	0.980973	6.03643e+08	3.56139e+08	1.81487e+08	2.12559e+08	6.16284e+08	1.46743e+08	1.66716e+08	1.95285e+08	2.31561e+08	2.09006e+08	2.45067e+08	2.01199e+08	4.15895e+08	8.83708e+08	4.48346e+08	2.74027e+08	2.85528e+08	2.73301e+08	2.20492e+08	8.36733e+07	2.09591e+08	2.08174e+08	1.10829e+08	2.51376e+08	3.30171e+08	3.65941e+08	2.67943e+08	3.45695e+08	4.67305e+08	1.82638e+08	2.25526e+08	2.8341e+08	2.18622e+08	2.9109e+09	4.42358e+08
	High	[R].DNTYNRVSEDLR.[S]		1	193	P02671-1	P02671-1 [124-135]		1	1481.7	5	0.993016	0.652883	0.672442	9.31285e+06	1.29635e+07	6.36831e+06	7.97316e+06	2.81893e+07	8.61506e+06	5.59847e+06	8.30509e+06	7.49732e+06	7.56244e+06	6.81776e+06	3.73369e+06	2.07962e+07	3.50097e+07	2.55721e+07	4.59387e+06	1.4214e+07	4.13797e+06	6.85425e+06	2.2192e+06	9.05421e+06	6.6655e+06	2.26701e+06	1.31255e+07	1.26077e+07	1.2371e+07	1.1288e+07	1.27059e+07	1.81716e+07	8.68366e+06	9.51139e+06	1.26369e+07	1.47872e+07	1.40298e+08	3.53903e+07
	High	[K].PVPDLVPGNFK.[S]		1	545	P02671-1	P02671-1 [228-238]		0	1182.65	9	0.976127	0.961931	0.153577	7.17906e+07	6.14069e+07	5.63167e+07	2.9675e+07	1.16121e+08	2.79079e+07	2.79735e+07	6.73803e+07	2.00697e+07	3.18357e+07	2.28653e+07	7.19641e+06	4.26854e+07	1.48881e+08	1.11959e+08	2.01714e+07	3.65305e+07	1.53157e+07	2.14261e+07	1.87142e+07	4.41055e+07	2.42711e+07	3.24293e+07	2.33557e+07	2.21029e+07	4.23413e+07	2.22873e+07	3.76168e+07	6.52539e+07	1.87078e+07	3.3332e+07	5.71688e+07	3.01337e+07	8.74337e+08	2.0808e+08
	High	[K].RLEVDIDIK.[I]		1	150	P02671-1	P02671-1 [168-176]		1	1100.63	15	0.835162	0.943341	0.993506	1.31824e+07	9.31051e+06	3.75513e+06	1.69716e+06	1.61039e+07	4.7686e+06	4.03838e+06	4.55029e+06	1.02921e+06	1.63808e+06	1.88839e+06	1.94987e+06	4.53361e+07	6.68385e+07	1.69504e+07	1.36779e+06	5.21897e+06	2.34743e+06	4.73211e+06	1.79741e+06	1.94609e+06	5.66167e+06	1.30275e+07	3.5601e+06	1.00054e+07	1.29135e+07	3.05961e+07	1.68787e+06	3.44368e+06	3.31195e+06	2.75709e+06	1.09942e+07	6.72576e+06	2.99613e+07	6.13536e+07
	High	[K].TVIGPDGHKEVTK.[E]		1	11	P02671-1	P02671-1 [468-480]		1	1380.75	0
	High	[K].ALTDMPQMR.[M]	1xOxidation [M]	1	1224	P02671-1	P02671-1 [250-258]		0	1078.5	50	0.830307	0.968726	0.754667	6.47861e+08	4.28049e+08	1.90623e+08	2.83817e+08	7.11326e+08	3.1797e+08	1.32852e+08	1.64636e+08	1.4243e+08	1.75245e+08	2.49138e+08	1.23055e+08	5.01503e+08	8.20529e+08	6.16879e+08	1.90367e+08	3.93745e+08	2.37027e+08	2.10452e+08	1.66714e+08	2.62296e+08	4.97174e+08	2.81054e+08	3.75597e+08	3.21014e+08	2.69287e+08	1.92569e+08	2.44242e+08	5.32661e+08	1.68613e+08	2.06619e+08	3.17752e+08	2.3176e+08	1.33511e+09	8.96941e+08
	High	[R].EYHTEK.[L]		1	171	P02671-1	P02671-1 [427-432]		0	806.368	9	0.815633	0.44806	0.0172525	1.37041e+07	776285	1.13811e+06	408945	2.54298e+06	625821	3.0599e+06	1.61924e+06	3.0218e+06	294346	569846	156001	1.82208e+06	2.77932e+06	3.53077e+06	1.28977e+06	166565			161702		330904		422199	1.64022e+07	359755	249080	1.16136e+06	680663	317044		1.27043e+06	484876	1.02034e+08	878435
	High	[R].DRQHLPLIK.[M]		1	39	P02671-1	P02671-1 [217-225]		1	1119.66	3	0.737138	0.623191	0.623238	1.31042e+07	9.13014e+06	3.51653e+06	3.33017e+06	9.12612e+06	8.57156e+06	5.56914e+06	1.43312e+06	2.9726e+06	2.44264e+06	700007	1.50641e+06	1.38187e+07	3.27828e+07	7.71321e+06	624207	1.63764e+06	1.83972e+06	985840	1.02287e+06	917418	1.70394e+06	1.71514e+06	920065	2.7444e+06	861232	4.27726e+06	3.82017e+06	1.7742e+06	555554	1.73185e+06	1.26296e+06	1.84161e+06	1.05498e+08	5.17296e+06
	High	[R].EVDLKDYEDQQK.[Q]		1	33	P02671-1	P02671-1 [191-202]		1	1509.71	1	4.74369e-17	4.58126e-17	3.66332e-17																				245231			447083			310734		292878		169551	145250	2.85518e+06	2.3353e+06
	High	[R].GDFSSANNR.[D]		1	122	P02671-1	P02671-1 [115-123]		0	967.423	2	0.854586	0.759294	0.329113	6.93612e+06	1.19363e+06	898606		5.07239e+06		462264			68694.7						586815				769394							3.92433e+06	778487
	High	[K].ALTDMPQMR.[M]		1	57	P02671-1	P02671-1 [250-258]		0	1062.51	1	0.804394	0.940684	0.999353	1.16723e+08	9.77124e+07	3.40296e+07	6.18157e+07	3.71731e+08	1.06865e+08	1.6845e+07	2.9503e+07	8.27888e+06	1.59449e+07	2.09014e+07	2.6857e+06	1.12811e+08	1.28549e+08	1.86779e+08	9.45146e+06	3.96805e+07	7.00568e+06	1.98273e+07	5.55947e+06	2.19814e+07	9.06488e+07	1.93862e+07	8.29281e+07	5.88315e+07	5.36543e+07	8.55903e+06	1.63233e+07	3.44344e+07	7.901e+06	2.41521e+07	7.88725e+07	3.84085e+07	1.94501e+08	2.64289e+08
	High	[R].QHLPLIK.[M]		1	146	P02671-1	P02671-1 [219-225]		0	848.535	8	0.255994	0.999895	0.172632	4.91977e+07	4.60827e+07	5.38839e+07	3.37075e+07	5.45842e+08	7.29809e+06	6.32241e+07	6.85923e+07	1.17158e+07	1.77592e+07	2.38994e+07	7.94326e+06	4.02202e+08	1.16376e+09	3.34282e+08	9.996e+06	2.78731e+07	1.71423e+07	1.45261e+07	3.87377e+06	1.8992e+07	2.53978e+07	4.20829e+06	6.24618e+07	5.7894e+07	1.03732e+08	3.17507e+07	2.10349e+07	5.54226e+07	3.32405e+07	3.5399e+07	1.17235e+08	8.13768e+07	1.31274e+09	3.59105e+08
	High	[K].EKVTSGSTTTTR.[R]		1	4	P02671-1	P02671-1 [447-458]		1	1267.65	1			3.66332e-17																																		7.30086e+06
	High	[R].AQLVDMK.[R]		1	316	P02671-1	P02671-1 [161-167]		0	804.428	4	0.953056	0.992211	0.941159	6.99222e+08	4.1868e+08	2.82021e+08	3.17706e+08	1.37788e+09	4.31614e+08	1.60071e+08	2.04345e+08	1.63804e+08	1.95072e+08	2.28422e+08	8.99382e+07	5.61651e+08	8.92869e+08	6.73126e+08	2.3071e+08	4.61527e+08	2.33922e+08	2.16434e+08	1.15844e+08	2.87169e+08	6.35835e+08	1.85655e+08	4.09429e+08	3.30043e+08	3.90126e+08	1.32149e+08	2.05152e+08	3.71581e+08	1.11404e+08	1.64422e+08	3.31757e+08	2.20425e+08	3.0219e+09	1.16412e+09
	High	[R].VSEDLRSR.[I]		1	68	P02671-1	P02671-1 [130-137]		1	961.506	1	0.945933	0.981304	0.752075						3.85195e+06	1.4871e+06	3.7769e+06	2.97363e+06		3.29457e+06					2.40474e+06	4.20411e+06	3.02375e+06			3.6814e+06	4.96013e+06	3.70298e+06	3.38212e+06	2.18615e+06		3.05884e+06	3.32637e+06	7.06177e+06	2.56078e+06	2.85211e+06	2.09341e+06
	High	[K].VTSGSTTTTR.[R]		1	16	P02671-1	P02671-1 [449-458]		0	1010.51	0			3.66332e-17
	High	[K].VPPEWK.[A]		1	626	P02671-1	P02671-1 [244-249]		0	755.409	20	0.986782	0.870255	0.863687	5.92143e+08	3.69776e+08	3.26649e+08	3.66331e+08	4.99964e+08	3.07021e+08	1.09413e+08	2.10461e+08	1.44882e+08	1.35359e+08	1.66139e+08	1.55113e+08	3.98582e+08	5.01972e+08	5.47814e+08	1.49053e+08	3.983e+08	1.62839e+08	1.69778e+08	1.21759e+08	3.53531e+08	5.11457e+08	1.50522e+08	2.29595e+08	2.44916e+08	3.84708e+08	4.95768e+07	1.78733e+08	4.56648e+08	2.00775e+08	2.31943e+08	2.08107e+08	2.48304e+08	1.98241e+09	5.40786e+08
	High	[R].PGGNEITR.[G]		1	16	P02671-1	P02671-1 [264-271]		0	843.432	2	4.74369e-17	0.181447	0.927124			1.22512e+06					847077																					269437					2.89554e+07
	High	[R].AQLVDMK.[R]	1xOxidation [M6]	1	1553	P02671-1	P02671-1 [161-167]		0	820.423	65	0.97518	0.758999	0.390429	1.92637e+08	9.41959e+07	2.14104e+08	6.35724e+07	2.92215e+08	2.65024e+08	2.4828e+08	2.38085e+08	3.61702e+08	5.17123e+07	2.55988e+08	7.40398e+07	1.14093e+08	3.13726e+08	2.4303e+08	2.62416e+08	2.68619e+08	2.06946e+08	4.91322e+07	2.41322e+08	2.06369e+08	1.7013e+08	2.10125e+08	1.48898e+08	1.74082e+08	1.38823e+08	1.11131e+08	1.91296e+08	1.70722e+08	2.3825e+08	1.28317e+08	1.04813e+08	1.41585e+08	6.39783e+08	4.83672e+08
	High	[K].NVRAQLVDMK.[R]	1xOxidation [M9]	1	21	P02671-1	P02671-1 [158-167]		1	1189.64	0	0.966542	0.980676	0.512829									524648	1.29695e+06	921985	256917	1.81666e+06		1.02386e+06									601667	1.7346e+06									1.02719e+07
	High	[K].VIEK.[V]		1	21	P02671-1	P02671-1 [145-148]		0	488.308	1	0.983422	0.000949238	0.930591	768477	1.11351e+06	599076			286049	23432.6	14050.9		533681	519268					181489			259534	7.31809e+06			1.33769e+06	768027			58839.7	7905.9	105376	21921.9	18203.1	204149		1.33197e+07
	High	[K].VTSGSTTTTRRSCSK.[T]	1xCarbamidomethyl [C13]	1	5	P02671-1	P02671-1 [449-463]		2	1628.8	0			3.66332e-17
	High	[R].GADYSLR.[A]		1	155	P02671-1	P02671-1 [848-854]		0	781.384	3	0.751246	0.443339	0.465685		2.73167e+06				3.44689e+06			1.24958e+06	1.14829e+06	1.09989e+06	2.15977e+06	2.58795e+06	7.0145e+06	7.83288e+06	2.08835e+06	5.16278e+06	2.11631e+06	1.80093e+06	1.80313e+06	1.4131e+06	3.04185e+06	3.8512e+06	3.37248e+06	6.24095e+06	3.11594e+06	5.73017e+06	2.29807e+06	4.79612e+06	1.83081e+06	2.57796e+06	5.04681e+06	4.6188e+06	5.68327e+06	1.95022e+07
	High	[K].LVTSK.[G]		1	43	P02671-1	P02671-1 [433-437]		0	547.345	2	0.988937	0.683162	0.878329	748764	186601		150507	681915		32607.3	429080	59722.9	326640	814948		461983	2.07882e+06	323775	16176.2	46236					279139		190446	150658	142836	176950		55689.5	108883	144401	202178	709181		1.68568e+06
	High	[R].REYHTEK.[L]		1	31	P02671-1	P02671-1 [426-432]		1	962.469	3	0.944691	4.58126e-17	0.921131	3.99931e+06	1.46344e+06	646722	465380																1.08357e+06		1.57499e+06												1.75371e+07
	High	[R].EVDLK.[D]		1	40	P02671-1	P02671-1 [191-195]		0	603.335	4	0.879129	0.999731	0.962612	1.45502e+07	1.0261e+07	3.5714e+06	4.71331e+06	1.00076e+07	1.53569e+07	7.11068e+06	7.09077e+06	4.72587e+06	3.79477e+06	5.02524e+06	2.09166e+06	1.0668e+07		2.25418e+06	5.08919e+06	4.47994e+06	3.66149e+06	4.63789e+06	4.2328e+06	9.77212e+06	8.29287e+06	5.26246e+06	5.0818e+06	7.71675e+06	7.4961e+06	4.83014e+06	3.57098e+06	6.02771e+06	9.69887e+06	1.05357e+07	1.01152e+07	5.68564e+06	6.52901e+07	1.30296e+07
	High	[R].ALAR.[E]		1	18	P02671-1	P02671-1 [187-190]		0	430.277	2	4.74369e-17	0.0131541	0.927533	483728	149984	795276	299412	39219.5	31588.7					15857.8														6476.57							51609.8	39419.9		454012
	High	[K].EKVTSGSTTTTRR.[S]		1	1	P02671-1	P02671-1 [447-459]		2	1423.75	0
	High	[R].PNNPDWGTFEEVSGNVSPGTR.[R]		1	1	P02671-1	P02671-1 [405-425]		0	2260.03	0	4.74369e-17	4.58126e-17	0.87811		62096.6			426330		75597.3
	High	[R].TWQDYK.[AR]		1	29	P02671-1	P02671-1 [688-693]		0	840.389	1	0.942852	0.928661	0.721621	1.23001e+06	376375	382624	277501	798444	1.18474e+06										372257	566244								1.28875e+06	721504	614304		273622
	High	[R].IEVLK.[R]		1	79	P02671-1	P02671-1 [138-142]		0	601.392	8	0.67494	0.747011	0.0692823	7.86074e+06	4.74606e+06	4.20422e+06	2.6103e+06	4.54921e+06	5.05387e+06	502066	3.06227e+06	494183	1.22151e+06	702699	795130	1.49567e+07	1.69986e+07	1.92447e+06	1.10663e+06	1.19312e+06	1.19615e+06	1.34636e+06	525640	1.67597e+06	1.71635e+06	1.0598e+06	1.1703e+06	746594	2.48468e+06	2.05376e+06	1.02586e+06	1.89947e+06	1.62529e+06	1.85132e+06	2.80834e+07	2.45028e+07	4.51181e+06	8.36661e+07
	High	[R].SRIEVLK.[R]		1	181	P02671-1	P02671-1 [136-142]		1	844.525	19	0.16848	0.189003	0.624775	2.44088e+07	8.95449e+06	6.16106e+06	2.29868e+06	1.64865e+08	7.00798e+06	8.28457e+07	9.7637e+07	8.20138e+07	6.96458e+07	1.13096e+08	8.52763e+06	2.75027e+08	6.65683e+08	2.85065e+08	3.79433e+07	1.65713e+08	1.5348e+07	1.23507e+07	6.68898e+06	2.90983e+07	2.03422e+07	5.58324e+06	1.44629e+08	1.67499e+08	2.04206e+08	2.72724e+08	1.02411e+08	2.61812e+08	1.14459e+08	1.10201e+08	2.15792e+08	1.41923e+08	6.55088e+09	4.74241e+08
	High	[K].DLLPSRDR.[Q]		1	496	P02671-1	P02671-1 [211-218]		1	971.527	39	0.808246	0.670074	0.669755	5.59197e+08	4.13894e+08	2.48714e+08	2.43572e+08	5.97898e+08	1.0983e+08	1.29156e+08	1.44504e+08	1.57178e+08	1.50505e+08	2.10133e+08	8.11607e+07	2.92574e+08	5.84175e+08	4.19748e+08	9.70234e+07	2.59516e+08	1.28531e+08	1.14037e+08	3.1811e+07	1.2673e+08	1.6215e+08	8.74904e+07	3.14265e+08	3.63329e+08	3.61278e+08	3.01566e+08	2.24834e+08	3.9079e+08	1.52814e+08	1.91813e+08	2.70261e+08	2.22791e+08	6.69294e+07	7.32842e+08
	High	[R].GSCSRALAR.[E]	1xCarbamidomethyl [C3]	1	6	P02671-1	P02671-1 [182-190]		1	977.495	1	4.74369e-17		3.66332e-17																						238984												4.18343e+06
	High	[K].DYEDQQK.[Q]		1	41	P02671-1	P02671-1 [196-202]		0	925.39	0	4.74369e-17	4.58126e-17	0.569846	408611	219225	217923	129064	477153	44328.9																											1.29757e+06	1.91979e+07
	High	[K].IRPLVTQ.[-]		1	13	P02671-1	P02671-1 [860-866]		0	826.515	1	0.61761	0.804873	0.852262	1.11914e+07	1.13684e+07	1.48643e+07	1.01151e+07	1.66531e+07	1.6451e+07	9.60982e+06	8.52959e+06	4.76838e+06	6.07149e+06	4.88498e+06	4.42645e+06	9.0926e+06	1.93923e+07	1.20209e+07	4.16463e+06	4.81625e+06	4.61647e+06	4.92747e+06	3.43335e+06	3.46966e+06	5.56982e+06	6.38007e+06	9.14741e+06	1.04899e+07	1.15932e+07	4.92189e+06	5.82368e+06	7.82331e+06	5.77966e+06	5.1309e+06	6.6691e+06	8.64039e+06		1.79448e+07
	High	[R].VSEDLR.[S]		1	16	P02671-1	P02671-1 [130-135]		0	718.373	0	4.74369e-17	4.58126e-17	3.66332e-17																1.84615e+06		2.21724e+06		809572		886633							1.05408e+06		2.03842e+06	841685
	High	[K].LVTSKGDK.[E]		1	12	P02671-1	P02671-1 [433-440]		1	847.488	1	4.74369e-17		3.66332e-17													45526.6
	High	[K].DLLPSR.[D]		1	152	P02671-1	P02671-1 [211-216]		0	700.399	5	0.998006	0.989539	0.411729	1.12991e+08	5.98667e+07	3.38578e+07	3.99984e+07	6.85974e+07	3.38979e+07	1.29207e+07	2.19596e+07	1.83737e+07	1.87169e+07	2.52266e+07	8.87124e+06	5.47617e+07	1.07956e+08	5.60297e+07	1.77843e+07	3.15622e+07	2.66403e+07	2.90042e+07	1.72134e+07	2.26963e+07	4.03122e+07	2.71109e+07	4.32883e+07	5.04252e+07	5.23387e+07	2.25675e+07	2.62849e+07	6.31881e+07	2.0475e+07	2.2578e+07	3.15351e+06	2.61327e+07	2.04917e+07	2.8882e+07
	High	[R].LEVLKR.[K]		1	12	P02671-1	P02671-1 [138-143]		1	757.493	0			3.66332e-17
	High	[K].TVTK.[T]		1	4	P02671-1	P02671-1 [464-467]		0	448.277	0
	High	[R].ALAREVDLK.[D]		1	1	P02671-1	P02671-1 [187-195]		1	1014.59	0
	High	[K].NSLFEYQKNNK.[D]		1	1	P02671-1	P02671-1 [90-100]		1	1384.69	0			3.66332e-17																																		3.51362e+06
	High	[R].VVER.[H]		1	1	P02671-1	P02671-1 [39-42]		0	502.298	0			3.66332e-17
	High	[K].EVTK.[E]		1	3	P02671-1	P02671-1 [477-480]		0	476.271	3	0.815478	4.58126e-17	0.954597	40043.4			29053																	18182.8												8899.26	1.221e+07
	High	[R].SCSK.[T]	1xCarbamidomethyl [C2]	1	2	P02671-1	P02671-1 [460-463]		0	481.208	1	4.74369e-17	4.58126e-17	0.984865	1.70919e+06	1.59633e+06	1.82232e+06	1.5184e+06		2.1528e+06		402732		108218
	High	[R].GKSSSYSK.[Q]		1	1	P02671-1	P02671-1 [574-581]		1	843.421	0
	High	[R].PDSPGSGNAR.[P]		1	1	P02671-1	P02671-1 [395-404]		0	957.438	0	0.651433	0.850083	0.917826								87185.8	42882.7		127456					32352.3		19367.1						141376	153014			42931.3	40205.7	28398.6			129233
	High	[K].ALTDMPQMR.[M]	2xOxidation [M5; M8]	1	702	P02671-1	P02671-1 [250-258]		0	1094.5	48	0.817052	0.840978	0.38422	1.68383e+08	1.75603e+08	1.00922e+08	4.5861e+07	7.35916e+07	1.03281e+08	1.66784e+08	1.53701e+08	2.68174e+08	2.43095e+08	1.62489e+08	1.09077e+08	8.27867e+07	1.0493e+08	8.5164e+07	1.30387e+08	1.7893e+08	9.49644e+07	5.60999e+07	1.16553e+08	1.10315e+08	7.5444e+07	6.51518e+07	5.80486e+07	1.39563e+08	1.20963e+08	2.02866e+08	1.15172e+08	2.78697e+08	1.10579e+08	1.00045e+08	1.20313e+08	9.51528e+07	1.26305e+09	1.13962e+08
P02549-1	SPTA1	spectrin alpha chain, erythrocytic 1 [OS=Homo sapiens]	n/a	High		0	64	5659	174	2419	279.8	5.05	3772.47	cell organization and biogenesis;cellular component movement;metabolic process;regulation of biological process;response to stimulus;transport	cytoplasm;cytoskeleton;cytosol;membrane	metal ion binding;protein binding;structural molecule activity	Pf00018, Pf00435, Pf07653, Pf08726, Pf14604	6708	1	ENSG00000163554.12	Apoptosis	Interaction between L1 and Ankyrins; COPI-mediated anterograde transport; RAF/MAP kinase cascade; NCAM signaling for neurite out-growth; Interleukin-20 family signaling		22	0	4.01699e+08	2.72244e+08	3.31696e+08	1.92085e+08	6.33571e+08	1.96636e+08	1.78895e+08	1.48773e+08	1.29769e+08	1.31046e+08	1.36876e+08	1.91983e+08	3.05861e+09	3.40326e+09	1.37721e+09	1.38019e+08	2.01808e+08	1.77748e+08	2.34176e+08	1.45579e+08	6.66807e+08	2.84051e+08	4.59057e+08	2.10819e+08
	Confidence	Annotated Sequence	Modifications	# Protein Groups	# PSMs	Master Protein Accessions	Positions in Master Proteins	Modifications in Master Proteins	# Missed Cleavages	Theo. MH+ [Da]	# Razor Quan Results	Abundance Ratio Adj. P-Value: (CP, Sample) / (Control, Control)	Abundance Ratio Adj. P-Value: (IPMN, Sample) / (Control, Control)	Abundance Ratio Adj. P-Value: (PA, Sample) / (Control, Control)	Abundances (Normalized): F1: Control, Control, Patient01	Abundances (Normalized): F2: Control, Control, Patient02	Abundances (Normalized): F3: Control, Control, Patient03	Abundances (Normalized): F4: Control, Control, Patient04	Abundances (Normalized): F5: Control, Control, Patient05	Abundances (Normalized): F6: Control, Control, Patient06	Abundances (Normalized): F7: Control, Control, Patient07	Abundances (Normalized): F8: Control, Control, Patient08	Abundances (Normalized): F9: Control, Control, Patient09	Abundances (Normalized): F10: Control, Control, Patient10	Abundances (Normalized): F11: Control, Control, Patient11	Abundances (Normalized): F12: Sample, CP, Patient12	Abundances (Normalized): F13: Sample, CP, Patient13	Abundances (Normalized): F14: Sample, CP, Patient14	Abundances (Normalized): F15: Sample, CP, Patient15	Abundances (Normalized): F16: Sample, CP, Patient16	Abundances (Normalized): F17: Sample, CP, Patient17	Abundances (Normalized): F18: Sample, CP, Patient18	Abundances (Normalized): F19: Sample, CP, Patient19	Abundances (Normalized): F20: Sample, CP, Patient20	Abundances (Normalized): F21: Sample, CP, Patient21	Abundances (Normalized): F22: Sample, CP, Patient22	Abundances (Normalized): F23: Sample, CP, Patient23	Abundances (Normalized): F24: Sample, IPMN, Patient24	Abundances (Normalized): F25: Sample, IPMN, Patient25	Abundances (Normalized): F26: Sample, IPMN, Patient26	Abundances (Normalized): F27: Sample, IPMN, Patient27	Abundances (Normalized): F28: Sample, IPMN, Patient28	Abundances (Normalized): F29: Sample, IPMN, Patient29	Abundances (Normalized): F30: Sample, IPMN, Patient30	Abundances (Normalized): F31: Sample, IPMN, Patient31	Abundances (Normalized): F32: Sample, PA, Patient32	Abundances (Normalized): F33: Sample, PA, Patient33	Abundances (Normalized): F34: Sample, PA, Patient34	Abundances (Normalized): F35: Sample, PA, Patient35
	High	[K].VTILGETAERLSESHPDATEDLQR.[Q]		1	9	P02549-1	P02549-1 [1239-1262]		1	2667.32	0	4.74369e-17		3.66332e-17													1.48321e+06	5.91882e+06																				7.40802e+07
	High	[R].QEAFLENEDLGNSLGSAEALLQK.[H]		1	23	P02549-1	P02549-1 [495-517]		0	2476.22	0	4.74369e-17	4.58126e-17	3.66332e-17													2.01373e+06	1.27604e+06	1.22537e+06						32148.3				1.12995e+06			169614	156398			465012	943455	5.16619e+07	333302
	High	[K].HEALENDFAVHETR.[V]		1	24	P02549-1	P02549-1 [1861-1874]		0	1667.78	2	0.942852	0.89799	0.999981							688996	3.16179e+06	219649			185759	7.11476e+06	3.30051e+07	1.67779e+06	558706	531439	953549	144925		353011	623130	435065			1.07072e+06	4.24265e+06		455718		766806	1.25227e+06	484206	2.07796e+08	1.64623e+07
	High	[R].VVEVNQYANECAEENHPDLPLIQSK.[Q]	1xCarbamidomethyl [C11]	1	16	P02549-1	P02549-1 [214-238]		0	2896.38	0	4.74369e-17	4.58126e-17	3.66332e-17													1.98257e+06												129337							89006	16843.4	2.97989e+07
	High	[R].LSESHPDATEDLQR.[Q]		1	114	P02549-1	P02549-1 [1249-1262]		0	1597.75	2	4.74369e-17	4.58126e-17	3.66332e-17												2.29387e+06	6.34299e+07	6.68206e+07	2.64041e+07	107509	157856				8.26623e+06		6.68346e+06		2.42693e+07			6.48426e+06	6.25122e+06	372625		2.73985e+06	2.53614e+06	1.79973e+08	2.53284e+06
	High	[K].MVEEGHFAAEDVASR.[V]	1xOxidation [M1]	1	80	P02549-1	P02549-1 [859-873]		0	1663.74	2	0.902005	0.999895	0.934482	5.04152e+06	4.01615e+06	2.93615e+06	2.68165e+06	1.51798e+06	4.88411e+06	2.11086e+06	1.07783e+06	2.74008e+06	2.13248e+06	821614	3.26691e+06	1.25458e+07	9.65253e+06	7.1067e+06	1.32288e+06	2.76836e+06	3.30438e+06	4.17507e+06	3.44394e+06	6.87908e+06	2.89709e+06	3.48909e+06	2.04978e+06	5.64714e+06	2.97723e+06	1.64347e+06	3.05028e+06	2.56623e+06	2.63031e+06	1.88637e+06	4.76111e+06	5.81783e+06	1.02625e+08	3.82561e+06
	High	[K].MVEEGHFAAEDVASR.[V]		1	33	P02549-1	P02549-1 [859-873]		0	1647.74	1	9.19606e-06	0.0802977	0.0551148											136482		1.30183e+07	7.09931e+06	4.10172e+06						1.64218e+06				2.93195e+06		162620					2.53915e+06	1.6913e+06	1.68141e+08	1.40514e+06
	High	[K].ALRNQANACQQQQAAPVEGVAGEQR.[V]	1xCarbamidomethyl [C9]	1	21	P02549-1	P02549-1 [957-981]		1	2694.31	1	4.74369e-17	4.58126e-17	3.66332e-17													3.48453e+06	1.97867e+06	2.4147e+06										1.85192e+06				216194			501765	855172	5.38669e+07
	High	[R].FTMGHSAHEETK.[A]		1	72	P02549-1	P02549-1 [119-130]		0	1374.61	4	0.956752	0.961931	0.638275	4.86226e+06	1.33019e+06	2.31206e+06	1.35382e+06	8.92321e+06	1.92288e+06	650128	1.75028e+06	524398	551451	835088	788133	6.12627e+07	1.31904e+08	1.84657e+07	200511	2.23439e+06			139868	599517	1.6173e+06			3.05702e+07	2.99003e+06	938624	773197	5.21396e+06	359386	1.20939e+06	2.46459e+07	1.00744e+07	1.58966e+09	1.60625e+07
	High	[K].VEAADHQGIVPAVYVR.[R]		1	23	P02549-1	P02549-1 [1017-1032]		0	1723.91	0	4.74369e-17	0.98583	0.912934										13405.5			4.61092e+06	3.25399e+06									303363	18511.6	1.06343e+06					12805.7		287603	139975	4.07401e+07
	High	[R].NQANACQQQQAAPVEGVAGEQR.[V]	1xCarbamidomethyl [C6]	1	61	P02549-1	P02549-1 [960-981]		0	2354.09	0	0.392324	0.419409	0.943281	1.82628e+07	1.66197e+07	5.99925e+07	1.22048e+07	4.51771e+07	7.11455e+06	1.15784e+07	9.29249e+06	3.56125e+06	7.94613e+06	9.66096e+06	1.21234e+07	9.07364e+07	2.74829e+08	1.06568e+08	1.87258e+07	1.60592e+07	1.30453e+07	4.30784e+07	1.19479e+07	1.70219e+07	2.61623e+07	1.18271e+07	2.39884e+07	2.42661e+07	5.90343e+07	1.51762e+07	1.9458e+07	1.08605e+07	1.96166e+07	2.75668e+07	5.26831e+07	2.43546e+07	4.00608e+07	1.98597e+08
	High	[K].QDTLDASLQSFQQER.[L]		1	44	P02549-1	P02549-1 [1970-1984]		0	1765.84	0	0.13309	0.532252	4.5334e-05	10326.2	28293.1						16385.5	4553.76			57081.4	4.64048e+06	1.36285e+06			33858.6	7902.14	51031.1	3.59242e+06	197475	205458	2.5984e+06		625843			53631	41951.5			211530	138968	2.09691e+07	2.69351e+06
	High	[K].HQSLEAEVQTK.[S]		1	59	P02549-1	P02549-1 [94-104]		0	1269.64	1	0.969825	0.0755387	0.927112	6.88103e+06	1.69245e+06	2.94055e+06		7.18828e+06					1.13763e+06		2.47214e+06	1.05048e+08	1.76354e+08	7.75662e+07	482145		494152			4.609e+06	2.21375e+06	210967	5.67804e+06	5.05902e+07	1.20685e+07	1.27522e+07	7.97161e+06	1.57509e+07	4.80077e+06	6.35761e+06	4.15777e+07	2.62968e+07	8.72512e+08	3.97889e+07
	High	[K].TAAINADELPTDVAGGEVLLDR.[H]		1	35	P02549-1	P02549-1 [390-411]		0	2240.14	0	0.310018	0.210776	0.898305	11162.4			17611.9						5634.68		95313.3	1.25331e+06	1.63712e+06	542368	10496.2		27223.9	48878.5		233226	33844.8	174340	27123.6	209599	18796.9	113863	149338	71931.2			46115.9	73336.8	181525	113308
	High	[R].MQHNLEQQIQAK.[D]		1	53	P02549-1	P02549-1 [2252-2263]		0	1467.74	0	4.74369e-17	4.58126e-17	3.66332e-17													9.8518e+06	1.20322e+07	6.41414e+06						1.45049e+06				4.3754e+06							2.83375e+06	1.27421e+06	2.08795e+08	1.78787e+06
	High	[K].CQALSAADPGSDLFSVQALQR.[R]	1xCarbamidomethyl [C1]	1	25	P02549-1	P02549-1 [1203-1223]		0	2234.09	1	0.832208	0.978952	0.453955	11712	19336.2	149140	78936.3	193023				9442.29	9170.19		62730.4	271104	547575	117933	15010	27187.5		8910.17	42689.7	213433	50974.4	120413	5282.49	69664.5	9243.57	56615.2	26593.7	2867.26	32637.2	14282.3	36984.1	51807.4	2.62106e+06	162128
	High	[K].MEENLSEPVHCVSLNEIR.[Q]	1xCarbamidomethyl [C11]; 1xOxidation [M1]	1	28	P02549-1	P02549-1 [2062-2079]		0	2172.01	0	4.74369e-17	4.58126e-17	3.66332e-17													1.23522e+07	9.26382e+06	4.99769e+06										2.48683e+06							903143	864617	2.00483e+08	2.88667e+06
	High	[K].HEDFEEAFTAQEEK.[I]		1	10	P02549-1	P02549-1 [518-531]		0	1709.73	1	4.74369e-17	4.58126e-17	3.66332e-17													2.89493e+06	3.78899e+06	1.31123e+06										688583							548861		5.71629e+07
	High	[K].KGDVLTLLSSINK.[D]		1	17	P02549-1	P02549-1 [1000-1012]		1	1387.82	2	4.74369e-17	0.982259	0.989485						2346.45	3485.54	5767.13	2364.57	70159.1																3721.6							6354.2	3.69471e+06
	High	[R].MQHNLEQQIQAK.[D]	1xOxidation [M1]	1	63	P02549-1	P02549-1 [2252-2263]		0	1483.73	1	0.696468	0.673617	0.736854	2.33312e+07	2.06339e+07	1.58016e+07	2.39498e+07	2.90017e+07	2.73508e+07	1.16229e+07	7.75495e+06	6.86544e+06	7.33448e+06	5.9741e+06	5.57238e+06	3.0243e+07	4.73802e+07	2.44656e+07	4.44614e+06	6.43384e+06	8.48824e+06	5.61795e+06	6.47459e+06	8.1792e+06	7.59845e+06	8.30615e+06	9.06172e+06	2.45309e+07	1.28323e+07	5.30168e+06	8.1084e+06	1.16287e+07	7.11549e+06	6.75465e+06	2.1165e+07	1.51131e+07	3.79326e+08	2.07455e+07
	High	[K].TGQEMIEGGHYASDNVTTR.[L]		1	33	P02549-1	P02549-1 [643-661]		0	2065.92	0	2.49471e-09	0.762196	0.89116			590678					310467	37340.6				5.43643e+07	9.91198e+06	4.40694e+06										3.02761e+06		552855	212305	338214	522311		3.14298e+06	1.73506e+06	3.04934e+07	2.63016e+06
	High	[K].TGQEMIEGGHYASDNVTTR.[L]	1xOxidation [M5]	1	68	P02549-1	P02549-1 [643-661]		0	2081.92	2	0.281354	0.210776	0.785422	419017											1.35746e+06	1.31338e+07	3.82247e+06	4.1837e+06		241864		563414		2.7344e+06	46039.9	1.77912e+06		9.83844e+06			1.46846e+06	1.6434e+06			5.29274e+06	5.13379e+06	5.49119e+07	1.31904e+06
	High	[K].VLETAEEIQERR.[Q]		1	2	P02549-1	P02549-1 [17-28]		1	1472.77	0			3.66332e-17																																		7.35129e+06
	High	[K].LIGDDHYDSENIK.[A]		1	66	P02549-1	P02549-1 [542-554]		0	1518.71	5	0.932263	0.717452	0.799498	2.58563e+06	2.12553e+06	1.46408e+06	1.34459e+06	1.78407e+06	3.02336e+06	3.04419e+06	4.59269e+06	7.33615e+06	1.93932e+06	1.07285e+06	2.96505e+06	1.04569e+08	8.78734e+07	3.45303e+07	1.22998e+06	2.36223e+06	1.81542e+06	1.67506e+06	1.87603e+06	7.40688e+06	3.75833e+06	902394	2.1691e+06	2.60455e+07	5.3465e+06	1.30587e+06	5.84009e+06	5.17082e+06	2.55494e+06	2.00156e+06	1.80995e+07	1.9398e+07	1.18551e+07	1.63389e+07
	High	[K].SSDEIENAFQALAEGK.[S]		1	46	P02549-1	P02549-1 [2353-2368]		0	1708.8	0	3.70305e-06	0.234104	0.414287	119644	20220.2	121112	14120.3	57573.7	131015	20718.9	9464.62	2492.28	9219.56			2.38667e+06	1.11033e+06	105474										703323	16568	5323.85	567770	196108	88275		187934	298562	1.8575e+07	164270
	High	[K].HQTFAHEVDGR.[S]		1	32	P02549-1	P02549-1 [1541-1551]		0	1296.61	4	0.942936	0.985735	0.580986	1.75008e+07	5.69424e+06	1.29902e+07	9.01498e+06	7.36806e+06		8.7185e+06	4.99187e+06	4.02779e+06	3.5554e+06	6.38389e+06	2.43542e+06	4.67321e+06	3.32332e+07	9.52172e+06	4.71798e+06	6.4991e+06	5.61556e+06	4.04535e+06	1.87674e+06	6.40264e+06	7.88574e+06	882237	5.45369e+06	7.43936e+06	6.68832e+06	2.4073e+07	6.61344e+06	4.61959e+06	4.7695e+06	5.82997e+06	5.36646e+06	4.24261e+06	5.76093e+07	2.08777e+07
	High	[R].FTMGHSAHEETK.[A]	1xOxidation [M3]	1	61	P02549-1	P02549-1 [119-130]		0	1390.61	3	0.000112643	0.00301311	0.360111			946513		39464.6	58115.7			346376			5792.49	1.45411e+07	1.58737e+07	3.34599e+06				38469.3		4.83382e+06				6.3594e+06			1.56279e+06	582165			1.74835e+06		1.03069e+08
	High	[K].AENTGVELDDVWELQK.[K]		1	23	P02549-1	P02549-1 [1103-1118]		0	1845.89	0	0.381427	0.924708	0.9744	28928.3											15454.5	2.91936e+06	1.67539e+06	425572						96269.2		88437.3		188570			32333.5	45878			155452	70973.5	3.20963e+07	537349
	High	[K].LTLSHPSDAPQIQEMK.[E]	1xOxidation [M15]	1	35	P02549-1	P02549-1 [330-345]		0	1810.9	1	0.457007	0.314571	0.974081	312583	344836		499788			978732	606810	1.08985e+06	757783	765271	767934	3.18395e+07	1.679e+07	1.3045e+07		148697	472609			4.64531e+06		974560		1.14353e+07	1.57698e+06	547213	3.58792e+06	3.36517e+06	1.99472e+06	1.87885e+06	7.89121e+06	9.65663e+06	2.0368e+08	8.7624e+06
	High	[K].QDTLDASLQSFQQERLPEITDLK.[D]		1	12	P02549-1	P02549-1 [1970-1992]		1	2675.35	0	4.74369e-17	4.58126e-17	3.66332e-17													399064	76882.5	48515.4		136060								56615.8							41184.9	55266.8	3.39955e+06
	High	[R].SHLSGYDYVGFTNSYFGN.[-]		1	2	P02549-1	P02549-1 [2402-2419]		0	2027.88	0			3.66332e-17																																		607062
	High	[K].GTQLHEANQQLQFENNAEDLQR.[W]		1	29	P02549-1	P02549-1 [680-701]		0	2583.22	3	0.999834	0.998843	0.512591	714292	1.33231e+06	1.52028e+06	1.84936e+06	1.04087e+06	1.31625e+06	339760	277304	126260	230330	277555	608387	2.17544e+07	2.81421e+07	8.97255e+06	256611	847710	366941	466173	1.73113e+06	511765	634239	4.24466e+06	913622	3.54894e+06	694838	776568	234916	388930	472325	718405	1.36901e+06	1.04058e+06	2.6275e+08	3.15673e+06
	High	[R].VILENIASHEPR.[I]		1	35	P02549-1	P02549-1 [837-848]		0	1377.75	2	0.946438	0.385941	0.0207612	514006	963558	3.5883e+07	763429		358019	329918	383121	246158	234743	212485	371792	4.3472e+07	3.34608e+07	1.69048e+07	471776	480375	351430	528141	151627	435836		426616		1.19539e+07	1.17226e+06	256955	937700	2.1939e+06		680730	2.51328e+07	1.28363e+07	4.90539e+08	8.21534e+07
	High	[K].EKEPVLTSEDYGK.[D]		1	64	P02549-1	P02549-1 [282-294]		1	1494.73	5	0.886417	0.624577	0.473173	5.27416e+06	7.45605e+06	5.36532e+06	4.72244e+06	8.12421e+06	5.10011e+06	1.79351e+06	1.61504e+06	1.70043e+06	1.18072e+06	1.05541e+06	3.03092e+06	2.89616e+07	3.01963e+07	1.59667e+07	1.44234e+06	2.6551e+06	2.94976e+06	2.36326e+06	2.26224e+06	6.05411e+06	3.24213e+06	3.73492e+06	2.89887e+06	1.43644e+07	4.48903e+06	1.4661e+06	5.26395e+06	1.38543e+06	2.46891e+06	2.61229e+06	7.65226e+06	8.26537e+06		8.57615e+06
	High	[K].LISAQHNQSK.[A]		1	139	P02549-1	P02549-1 [1995-2004]		0	1125.6	3	0.712487	0.901926	0.624553					3.55446e+06		1.49781e+06	640997	512448	484637		848507	3.82503e+06	6.3922e+06	2.91533e+06	708301		145135	680320	663382	3.78434e+06	1.33674e+06	1.7729e+07	714847	1.41689e+06	1.2794e+06	978347	298774		652407		573638	1.48171e+06	4.28112e+07	2.78522e+06
	High	[R].FSSDFDELSGWMNEK.[T]	1xOxidation [M12]	1	17	P02549-1	P02549-1 [375-389]		0	1807.75	1	4.74369e-17	4.58126e-17	3.66332e-17												12570.3	847643	770079	292517				18070.1		98981.6		186856		12850.3							76080.1	13427.5	1.66723e+07	90842.8
	High	[R].GDCGDTLAATQSLLMK.[H]	1xCarbamidomethyl [C3]; 1xOxidation [M15]	1	30	P02549-1	P02549-1 [1845-1860]		0	1696.79	1	0.338716	0.958272	0.909604	141006											21157.2	6.38211e+06	3.35003e+06	1.53433e+06						202061	12998.9			309198		17685.6	167727	67304.8			550996	267386	4.60001e+07
	High	[K].IVDLGDNLEDALILDIK.[Y]		1	4	P02549-1	P02549-1 [2216-2232]		0	1869.02	0	4.74369e-17		3.66332e-17													241038																					1.76174e+06
	High	[K].ETGTLESQLEANK.[R]		1	105	P02549-1	P02549-1 [2188-2200]		0	1419.7	1	0.783862	0.128837	0.0175883	1.72371e+06	503415	495628		3.61738e+06	444003	198913	231298	158124	340655		845256	3.08887e+07	2.35571e+07	9.52136e+06	8476.26		408432	891790	193577	6.87062e+06	527039	2.35425e+06		1.94014e+07	1.0591e+06		3.17384e+06	3.45639e+06	411843	340028	1.49717e+07	9.51793e+06	4.08777e+08	8.77295e+06
	High	[K].MELNEAWEDLQGR.[T]	1xOxidation [M1]	1	58	P02549-1	P02549-1 [1265-1277]		0	1606.72	3	0.772111	0.985164	0.893763			1.30991e+06		919404		182683	297659	64046	93306.3		151648	1.12827e+07	9.33751e+06	5.34371e+06	206668	471198	153532	441114	100310	1.5106e+06	510776	393204	253213	1.66393e+06			149736	315965	207546		1.73114e+06	1.2344e+06	1.00304e+08	5.56267e+06
	High	[K].EPIVDNTNYGADEEAAGALLK.[K]		1	24	P02549-1	P02549-1 [919-939]		0	2190.06	1	0.794174	0.481575	0.952048	32115.1		13144.8	97191.4	206701							62931.8	1.98251e+06	3.4537e+06	812231	297754	64213.9	38569.8	39357	64009.2	137975	365579	173808		656428			166903	274846		25129.2	1.50517e+06	433925	3.48983e+07	498907
	High	[R].QEQIENQYR.[S]		1	83	P02549-1	P02549-1 [1057-1065]		0	1207.57	5	0.0135151	0.701745	0.87811					2.38412e+06			503656				1.99358e+06	2.99324e+07	2.89063e+07	1.81885e+07	751086			1.58417e+06		9.26531e+06		5.04729e+06		1.42468e+07	943148	1.03069e+06	2.35558e+06	2.36817e+06		1.5678e+06	1.29246e+07	6.33614e+06	4.35133e+08	1.65314e+07
	High	[K].EAIATSVELGEDWER.[T]		1	2	P02549-1	P02549-1 [178-192]		0	1704.81	0			3.66332e-17																																		8.81125e+06
	High	[K].HFDENLTGR.[L]		1	22	P02549-1	P02549-1 [2282-2290]		0	1088.51	3	0.879574	0.604287	0.99804						1.80624e+06	585282	2.23829e+06		601344			5.46149e+06	3.12792e+06	5.92633e+06		1.65833e+06	586771		559887	1.36239e+06				3.03155e+06	3.17403e+06	1.07597e+07	393606		1.51506e+06	536170	1.6572e+06	810986	2.33701e+07	1.35353e+07
	High	[K].HGLLESAVAAR.[Q]		1	17	P02549-1	P02549-1 [729-739]		0	1123.62	0	4.74369e-17	0.198488	0.00240687							565365	189278					2.37895e+07	3.24374e+07	7.70453e+06										1.37107e+06		988934					5.3486e+06	2.75582e+06	1.73428e+08	9.58211e+06
	High	[R].VQNVCAQGEDILNK.[EV]	1xCarbamidomethyl [C5]	1	123	P02549-1	P02549-1 [1875-1888]		0	1587.78	2	0.115776	0.151252	0.143968	304866	1.23036e+06	1.47291e+06	296276								497510	1.13261e+07	1.04277e+07	4.07669e+06					60925.5	3.40475e+06		1.96087e+06	2.95521e+06	5.02572e+06	4.21009e+06		1.58789e+06	2.72988e+06	2.76989e+06	2.70865e+06	1.64632e+06	7.69684e+06	1.20791e+08	1.18655e+07
	High	[K].LERDDLEK.[A]		1	70	P02549-1	P02549-1 [1375-1382]		1	1017.52	7	6.04505e-05	1.81904e-05	0.0171515	976183	305556	1.1437e+06	230245	1.73215e+07	3.12261e+06	2.98483e+06	2.24342e+06	880151	1.69202e+06	3.7577e+06	1.24597e+07	1.32931e+08	1.14456e+08	4.32809e+07	5.70761e+06	7.69238e+06	1.31455e+07	1.19792e+07	9.67468e+06	3.40833e+07	1.93281e+07	2.81547e+07	9.67081e+06	8.28497e+07	1.41125e+07	2.16193e+07	2.11968e+07	2.64778e+07	7.99307e+06	7.35368e+06	5.9048e+07	5.28853e+07	6.47275e+07	2.6082e+07
	High	[R].DSEQVDSWMSR.[Q]		1	32	P02549-1	P02549-1 [484-494]		0	1339.56	1	0.864653	0.0692291	0.767148	969231	3.32621e+06	4.65245e+06	1.38225e+06	935039	247924	1.34153e+06	88371.2	105352			124076	7.27625e+06	1.0679e+07	2.64025e+06		327952	153017	283711		1.11091e+06	703178	562304	534609	3.05392e+06	41594.2		229653	144976	18053.9		1.16272e+06	1.09747e+06	9.81948e+07	1.07219e+06
	High	[K].AAVGQEEIQLR.[L]		1	83	P02549-1	P02549-1 [1783-1793]		0	1213.65	3	0.0444787	0.0180324	0.0230341	1.27504e+06			277992			193345	366992		302791	177088	1.57161e+06	8.20528e+07	8.40069e+07	3.50134e+07	303807	211440	569298	1.10465e+06	2.05778e+06	7.62379e+06	2.78267e+06	9.4296e+06	612659	2.53602e+07			2.00461e+06	2.11655e+06		83346	1.95883e+07	6.61961e+06	9.23591e+08	1.72221e+07
	High	[K].KLADDEDYK.[D]		1	52	P02549-1	P02549-1 [603-611]		1	1096.52	2	0.000911553	0.21835	0.955815	662246												2.18158e+07	8.45446e+06	6.18461e+06						3.15587e+06				1.36568e+07			1.05748e+06	2.2118e+06					3.06162e+08
	High	[K].DHEDFLASLAR.[A]		1	4	P02549-1	P02549-1 [2084-2094]		0	1273.62	0	4.74369e-17	0.463523	3.66332e-17								9225.71					810265	3.23571e+06											123860		17982.8
	High	[K].QALTPEQVSFCATHMQQYMDPR.[G]	1xCarbamidomethyl [C11]; 1xOxidation [M15]	1	2	P02549-1	P02549-1 [2378-2399]		0	2654.18	0
	High	[R].ENSLRSDDK.[S]		1	14	P02549-1	P02549-1 [1415-1423]		1	1063.5	0			3.66332e-17																																		8.55671e+06
	High	[K].ADVVEAWIADK.[E]		1	23	P02549-1	P02549-1 [1937-1947]		0	1216.62	0	0.136462	0.0485779	0.553858	157124	41873.1	104232	55952.8		171256	108623	23964.9	86993.8	13499.1		68893.8	1.52213e+07	1.60938e+07	3.78735e+06		22697.7	9587.37			587682			34059.2	3.9392e+06			525492	556023	930804	171925	1.95723e+06	1.00143e+06	2.66844e+08	1.51972e+06
	High	[K].QNEVNAAWER.[L]		1	74	P02549-1	P02549-1 [239-248]		0	1216.57	0	0.0418562	0.00109447	0.0401074	1.32163e+06							211034		62033.5		1.16284e+06	3.53404e+07	2.95383e+07	1.14534e+07		146761	385784	527556		6.26004e+06	1.04687e+06	3.26696e+06		9.78946e+06			1.72959e+06	2.23771e+06			9.58888e+06	8.84031e+06	4.29176e+08	8.12736e+06
	High	[R].VSSQDYGRDLQGVQNLLK.[K]		1	5	P02549-1	P02549-1 [1736-1753]		1	2020.05	0	4.74369e-17		3.66332e-17														26467.9							756827		1.14243e+06
	High	[R].WLEDVEWQVTSEDYGK.[G]		1	2	P02549-1	P02549-1 [702-717]		0	1983.9	0			3.66332e-17																																		769156
	High	[R].ARQESLVCR.[F]	1xCarbamidomethyl [C8]	1	79	P02549-1	P02549-1 [766-774]		1	1118.57	1	0.0024199	0.0136581	0.834092	4.36974e+06						361029					2.46178e+06	4.95295e+07	5.03739e+07	1.77452e+07				1.23758e+06		7.72865e+06		8.47095e+06		3.06669e+07		2.36007e+06	4.39258e+06	8.38914e+06			2.51346e+07	1.97252e+07	1.21362e+09	1.53131e+07
	High	[K].ALSNAANLQR.[F]		1	215	P02549-1	P02549-1 [259-268]		0	1057.57	9	0.338824	0.93336	0.577237	1.04043e+07	6.62063e+06	5.19601e+06	7.86407e+06	3.43156e+06	6.11576e+06	3.50977e+06	2.33368e+06	1.78437e+06	2.97519e+06	1.4333e+06	6.56545e+06	1.14158e+08	1.08432e+08	3.19903e+07	2.09841e+06	3.53952e+06	3.7379e+06	6.82346e+06	3.80587e+06	2.71362e+07	8.80963e+06	1.43877e+07	3.26729e+06	4.61349e+07	5.40035e+06	3.12657e+06	1.18745e+07	1.36727e+07	2.86313e+06	2.45886e+06	3.11344e+07	3.25428e+07	2.43143e+08	2.8895e+07
	High	[R].GLNYYLPMVEEDEHEPK.[F]	1xOxidation [M8]	1	20	P02549-1	P02549-1 [2302-2318]		0	2078.94	1	4.74369e-17	4.58126e-17	3.66332e-17													3.99934e+06	6.32002e+06	1.82428e+06		215199			1.14165e+06		78327.6	164051		500427				27861.7			268663	202885	1.28484e+08	1.09536e+06
	High	[K].EGRVVEVNQYANECAEENHPDLPLIQSK.[Q]	1xCarbamidomethyl [C14]	1	2	P02549-1	P02549-1 [211-238]		1	3238.54	0
	High	[K].SYEDPTNIQGK.[Y]		1	129	P02549-1	P02549-1 [80-90]		0	1251.59	3	0.593603	0.0131891	0.935487	6.91155e+06	2.88139e+06	2.10194e+06	1.7377e+06	1.58457e+06	2.5897e+06	1.40967e+06	2.50453e+06	1.03225e+07	974745	635135	4.36788e+06	6.20075e+07	5.73158e+07	2.57703e+07	1.259e+06	4.46244e+06	2.54788e+06	3.19949e+06	2.06987e+06	1.77351e+07	2.84701e+06	1.18263e+07	1.02102e+06	2.43006e+07	1.54123e+07	3.54101e+06	1.32378e+07	7.53625e+06	1.02586e+07	9.07245e+06	2.09842e+07	2.04916e+07	8.88864e+08	1.72305e+07
	High	[K].HLSDIIEER.[E]		1	4	P02549-1	P02549-1 [2133-2141]		0	1111.57	0
	High	[R].EEPGNITQRQEQIENQYR.[S]		1	3	P02549-1	P02549-1 [1048-1065]		1	2232.06	0		4.58126e-17	3.66332e-17																									264551									7.46193e+06
	High	[K].LEESLEYLQFMQNAEEEEAWINEK.[N]	1xOxidation [M11]	1	2	P02549-1	P02549-1 [1815-1838]		0	2988.35	0			3.66332e-17																																		143165
	High	[K].LTLSHPSDAPQIQEMK.[E]		1	12	P02549-1	P02549-1 [330-345]		0	1794.91	0	4.74369e-17	4.58126e-17	3.66332e-17													2.89497e+07	5.46348e+07	3.13329e+07	19934.7	1.64835e+07	20447.4		7.26199e+06	2.23927e+07		41163.9		1.33809e+06				16499			1.36752e+06	149355	1.16352e+08	1.46209e+06
	High	[K].DATNIQRK.[Y]		1	13	P02549-1	P02549-1 [1530-1537]		1	945.511	0
	High	[K].ETVVESSGPK.[V]		1	157	P02549-1	P02549-1 [7-16]		0	1032.52	3	0.673185	0.391604	0.00820672	5.56937e+06		3.20156e+06	452381	4.22579e+06	2.89594e+06	995160		4.92916e+06	1.21177e+07		8.19655e+06	9.45533e+07	5.49137e+06	3.01644e+06	2.7955e+06	996533	3.95889e+06	6.44255e+06	2.51344e+06	2.82861e+07	5.55582e+06	2.31707e+07	5.17818e+06	5.89826e+07	4.75123e+06	1.01145e+07	1.60791e+07	1.59675e+07	5.85957e+06	5.91526e+06	4.93842e+07	5.81671e+07	4.82593e+08
	High	[K].LEDSYHLQVFK.[R]		1	2	P02549-1	P02549-1 [49-59]		0	1378.7	0
	High	[K].VLETAEEIQER.[R]		1	123	P02549-1	P02549-1 [17-27]		0	1316.67	3	0.457519	0.553063	0.549375	1.6956e+06						551342	510155		257097	133539	1.36812e+06	6.52682e+07	5.52705e+07	2.96286e+07	112874	456504	965337	1.42671e+06	45626.8	1.02047e+07	1.4823e+06	6.20638e+06		3.04681e+07	1.12576e+06	859855	5.01446e+06	4.04278e+06	308400	169203	1.77666e+07	1.50697e+07	2.22173e+08	1.49979e+07
	High	[K].SLNQNMESLR.[A]		1	52	P02549-1	P02549-1 [876-885]		0	1191.58	3	0.0101676	0.0503419	0.782204	1.09925e+06	578517					318330	453968				991619	2.19909e+07	1.31443e+07	9.77275e+06			370372	416875		5.37375e+06	945367	4.74545e+06		9.75178e+06			3.18108e+06	2.59629e+06			7.59022e+06	6.5911e+06	1.16635e+08	1.13621e+07
	High	[R].ALATSRYEK.[L]		1	38	P02549-1	P02549-1 [357-365]		1	1038.56	3	0.413127	0.695144	0.627052	5.80253e+06		709046			485767	6.58314e+06	2.77537e+06	3.81018e+06		1.03746e+07	3.1574e+06	5.46608e+07	7.13622e+07	1.84254e+07	4.83485e+06	4.61887e+06	6.5888e+06	1.85047e+06	3.13327e+06	1.74502e+07	9.14331e+06	1.36487e+07	3.77139e+06	4.96626e+07			8.2521e+06	1.31331e+07	4.32995e+06	4.05862e+06	2.77548e+07	2.54763e+07	1.64437e+09	1.30341e+07
	High	[K].CLLELDQQIK.[A]	1xCarbamidomethyl [C1]	1	31	P02549-1	P02549-1 [2101-2110]		0	1259.67	2	0.723406	0.924493	0.932956				191608								80201.7	2.40005e+07	9.73729e+06	3.91847e+06	25250.7		15860.6	94216.5		645643		452475	99554.6	2.76531e+06			474226	516638	88581.4	142197	1.16993e+06	1.98614e+06	1.7106e+08	2.54724e+06
	High	[K].ASALNNWCEK.[M]	1xCarbamidomethyl [C8]	1	66	P02549-1	P02549-1 [2052-2061]		0	1192.54	1	0.527991	0.514106	0.704775	3.16051e+06	2.7604e+06	2.47816e+06	2.4049e+06		1.08886e+06	506144	800438	572556	951410	1.18918e+06	2.91234e+06	5.62651e+07	4.16451e+07	1.54608e+07	2.72563e+06	2.41976e+06	996708	3.05742e+06	651213	8.99518e+06	2.55547e+06	5.95703e+06	1.30281e+06	1.01653e+07	3.10042e+06	1.30184e+06	3.36909e+06	3.50979e+06	2.55396e+06	1.62736e+06	1.26404e+07	1.09278e+07	5.23014e+08	8.51643e+06
	High	[K].EDLVSSWEHIR.[A]		1	5	P02549-1	P02549-1 [346-356]		0	1370.67	1	0.779127	0.652883	0.774519		159167	182389	186623	499135	298635									133149	32389.3								63481.7	58821.4		65544.6		58528.2				15873	1.08397e+08
	High	[R].IQEITERGNK.[M]		1	32	P02549-1	P02549-1 [849-858]		1	1187.64	0	0.336172	4.58126e-17	3.66332e-17							8127.6						50177.8	211502											1.07024e+06							1.52842e+06	549131	2.48965e+07
	High	[K].VLQEESQNK.[E]		1	43	P02549-1	P02549-1 [1889-1897]		0	1074.54	2	0.956233	4.58126e-17	6.47326e-05							350077	205094	207606	157982	213771					141643																2.04229e+06	3.14149e+06	1.46589e+08
	High	[R].REEPGNITQR.[Q]		1	23	P02549-1	P02549-1 [1047-1056]		1	1199.61	1			3.66332e-17																																		4.16978e+08
	High	[R].DSEQVDSWMSR.[Q]	1xOxidation [M9]	1	36	P02549-1	P02549-1 [484-494]		0	1355.55	2	0.976212	0.961926	0.9744	1.62845e+06					471241						376341	3.95635e+06		1.2769e+06		670776				1.67812e+06		512530	694072	2.26879e+06			528070	1.49231e+06			1.8508e+06	1.67222e+06	2.90033e+07
	High	[R].VMALYDFQAR.[S]		1	8	P02549-1	P02549-1 [982-991]		0	1213.6	0	0.221832	0.287502	0.177523									1.98076e+06		387129	196203	1.73101e+06	5.87428e+06				60946.1	128008	285263		87680.9	229670		536404	371566		117713		211388	262453	300316	90721.8
	High	[K].GLAEVQNR.[L]		1	85	P02549-1	P02549-1 [718-725]		0	886.474	4	0.000514335	0.882938	0.152556	1.17797e+06	3.58888e+06	4.10631e+06	2.44547e+06	1.55328e+08	742449	1.98778e+06	2.32474e+06		415950	1.10824e+06	211478	1.1521e+08	2.13997e+08	6.2472e+07	1.57952e+07	6.65133e+06	1.9677e+06	1.276e+06		4.30617e+07	831108	1.70815e+07	2.13833e+06	4.53679e+07	2.34508e+06	1.18288e+06	577009	1.47234e+06	1.33636e+06	780313	3.93133e+07	3.50493e+07		5.13509e+07
	High	[R].VMALYDFQAR.[S]	1xOxidation [M2]	1	33	P02549-1	P02549-1 [982-991]		0	1229.6	2	0.042075	0.568901	0.0121135	3.08062e+06			7.8755e+06	2.1108e+06				8.38237e+06			256381	4.29712e+07		1.27644e+07	24068	90236.8			654144	3.81624e+06	591727	3.56726e+06		1.586e+07	9.03762e+06	582936			50452.7	2.73455e+06	1.05472e+07	1.49633e+07	1.58531e+07	2.20265e+07
	High	[K].EPVLTSEDYGK.[D]		1	45	P02549-1	P02549-1 [284-294]		0	1237.59	3	0.28858	0.0314385	0.67113	1.29484e+06								114054	409338		1.4596e+06	1.87936e+07	1.28062e+07	7.31228e+06	350960	1.47289e+06	196508	740980	567719	5.17785e+06	1.26349e+06	3.42195e+06	1.57783e+06	6.5884e+06	3.24076e+06	5.52248e+06	2.92114e+06	2.49994e+06			6.00049e+06	6.05495e+06	6.31619e+07	4.73936e+06
	High	[R].DTEDEEAWIQETEPSATSTYLGK.[D]		1	3	P02549-1	P02549-1 [801-823]		0	2600.15	0	4.74369e-17	4.58126e-17	3.66332e-17													50360.8	28685.9	79133.7										8989.88				11235.1			4630.22		1.1157e+06
	High	[R].LAQFVEHWEK.[L]		1	2	P02549-1	P02549-1 [1794-1803]		0	1286.65	0
	High	[K].VADDLLFEGLLTPEGAQIR.[Q]		1	1	P02549-1	P02549-1 [1140-1158]		0	2057.09	1	4.74369e-17	4.58126e-17	1.08513e-07	12959.7									56862.1																						217360		5.09904e+06
	High	[R].LAHDEFPMLPQR.[R]	1xOxidation [M8]	1	4	P02549-1	P02549-1 [1034-1045]		0	1469.72	0
	High	[K].LQLEDDYAFQEFNWK.[A]		1	5	P02549-1	P02549-1 [1922-1936]		0	1945.9	2	0.108611	0.56381	0.532531										2384.54			48351.9	61692.9		28642.5			321341			214554			9731.14		24125				4030.93	15747.8		953913	27962.7
	High	[K].LQATYWYHR.[F]		1	2	P02549-1	P02549-1 [366-374]		0	1237.61	0
	High	[R].AYFLDGSLLK.[E]		1	13	P02549-1	P02549-1 [2178-2187]		0	1126.61	1	0.999846	0.0329777	0.673132			221951	7905.37	429795	320437						236305	30026.2	87814.4	79609.4	277958	434834	768435	492900		1.23928e+06	258926	58285.5				16532.6
	High	[K].LADDEDYK.[D]		1	95	P02549-1	P02549-1 [604-611]		0	968.421	4	4.74369e-17	4.58126e-17	3.66332e-17												1.42229e+06	2.17849e+07					613409			1.14998e+07	1.42267e+06	8.73739e+06	760135	2.15715e+07			6.00819e+06	4.56205e+06	1.50724e+06		1.39472e+07	1.24049e+07	5.68591e+07
	High	[K].SLNQNMESLR.[A]	1xOxidation [M6]	1	50	P02549-1	P02549-1 [876-885]		0	1207.57	2	0.1367	0.0157241	0.576769	2.90179e+06		3.09127e+06		596892	643729			414327	262621	196692	3.07215e+06	2.2307e+07	1.19797e+07	8.2216e+06	425189		1.46839e+06	1.21434e+06	618329	9.67562e+06	683854	7.75852e+06	1.43986e+06	1.58657e+07			4.6519e+06	4.12189e+06		216806	1.05654e+07	7.8703e+06	4.41588e+08	7.20012e+06
	High	[K].VTILGETAER.[L]		1	65	P02549-1	P02549-1 [1239-1248]		0	1088.59	4	0.988901	0.951604	0.542094	1.53605e+06	1.4997e+06	956829	181372	5.35689e+06			578512	209060	219673	546702	146056	3.62854e+07	4.62162e+06		210356	889792	224751	1.02823e+06	105152	381967	933230	626867	350951	1.19468e+07	662617		145802	584795	152811			453362	3.5955e+07
	High	[K].LYEDSDDLK.[N]		1	160	P02549-1	P02549-1 [587-595]		0	1097.5	3	0.0461584	6.79823e-06	0.101985	3.24883e+06		553752				612379	574172				5.75195e+06	6.71249e+07	5.53342e+07	2.63092e+07	721505	883866	1.72654e+06	3.18681e+06	1.59819e+06	2.18788e+07	2.80234e+06	1.74375e+07		3.47149e+07		828146	8.66942e+06	7.60192e+06			2.40344e+07	2.37485e+07	2.10696e+07	2.16996e+07
	High	[K].SSLDSLEALMK.[K]	1xOxidation [M10]	1	30	P02549-1	P02549-1 [1424-1434]		0	1209.6	0	0.0911168	0.0841165	0.00211938	14399.7	21994.3				34525.8			15972.1	7334.9	18871.9	117121	1.07799e+06			115110	406128	7365.77	258724		339710	213235	334549	138217	196006	582879		31869	189132	360777	362048	361949	9602.45	9.26035e+06
	High	[K].LGDYANLK.[Q]		1	44	P02549-1	P02549-1 [1496-1503]		0	893.473	2	0.0722644	0.86815	0.849379	414736	2.37524e+06	1.04924e+06		3.92301e+06	398626	480870	1.39462e+06	1.17046e+06	27410.6	590858	4.54326e+06	1.45166e+08	8.49306e+07	5.2058e+07	1.10921e+06	2.21732e+06	1.94579e+06	3.0794e+06	1.37184e+06	3.08596e+07	4.16689e+06	2.31241e+07	1.01867e+06	527097	1.21475e+06		403308	322072	1.03411e+06	306139	2.61108e+07	2.76662e+07	4.4602e+07	2.66587e+07
	High	[K].TQLENIQK.[T]		1	92	P02549-1	P02549-1 [635-642]		0	973.531	4	0.466629	0.241358	0.688971	3.95129e+06	4.04431e+06			3.05711e+06	1.0587e+06	3.01311e+06			346489	2.07085e+06		893413	8.32264e+06	533610	416364	979584	2.03285e+06			457596	1.78825e+06	2.6106e+06	1.376e+06	454309	156838	204036		1.53679e+06	1.30075e+06			1.43464e+06	1.61907e+09
	High	[R].EEPGNITQR.[Q]		1	26	P02549-1	P02549-1 [1048-1056]		0	1043.51	1			3.66332e-17																																		6.60032e+06
	High	[K].FLDAVDPGRK.[G]		1	31	P02549-1	P02549-1 [2322-2331]		1	1117.6	0	4.74369e-17	4.58126e-17	3.66332e-17												609347	1.66833e+07	8.7368e+06	8.41565e+06	402271	1.13545e+06	968402		406097	865809	616231	662624	1.30833e+06	5.26033e+06	7.35512e+06	2.10452e+06	996272	1.06609e+06		855206	2.6323e+06	2.03817e+06		3.68837e+06
	High	[K].KFEDFQVELVAK.[E]		1	3	P02549-1	P02549-1 [199-210]		1	1452.77	0
	High	[R].NLAVMSDK.[V]		1	32	P02549-1	P02549-1 [312-319]		0	877.445	0	0.0382104	4.58126e-17	0.995231	664129			342972	710475										4.77236e+06																			4.24454e+08
	High	[K].NALAVRGDCGDTLAATQSLLMK.[H]	1xCarbamidomethyl [C9]; 1xOxidation [M21]	1	2	P02549-1	P02549-1 [1839-1860]		1	2321.16	0	4.74369e-17	8.03336e-07	3.78981e-07									11205.1				1.33135e+06	1.19588e+06													550576
	High	[R].RREEPGNITQR.[Q]		1	57	P02549-1	P02549-1 [1046-1056]		2	1355.71	1	0.792314	0.75858	0.950424	735331	709352	741471	365777	2.66138e+06	1.25256e+06	1.78674e+06	1.05092e+06	793776	911142	2.03567e+06	283556	3.00631e+07	8.11523e+07	8.2229e+06	733863	6320.55	2.10309e+06	800528	1.16791e+06	2.05338e+06	3.06311e+06	1.45319e+06	1.53544e+06	2.86292e+06	789157	7.42005e+06	665631	1.84391e+06	1.18844e+06	1.55474e+06	3.81957e+06	2.76494e+06	1.22535e+09	1.12729e+07
	High	[K].EFSTIYK.[H]		1	59	P02549-1	P02549-1 [2275-2281]		0	887.451	5	0.378815	0.802943	0.141322	335576	1.53571e+06	1.63922e+06	237089		3.98027e+06	229706	686265	204342	130340	593768	2.26601e+06	6.26394e+06	2.32265e+07	8.4002e+06	605141	1.40661e+06	505209	1.18767e+06	402908	6.69072e+06	402823	664086	33133.4	2.38718e+07	682576	253995	3.90165e+06	3.14545e+06		77656.5	1.73395e+07	1.3741e+07	5.28581e+08	157638
	High	[K].AIRDGLLAR.[R]		1	19	P02549-1	P02549-1 [555-563]		1	984.595	4	4.21123e-15	0.987034	0.0479785	605798												3.87872e+07	2.41756e+07	8.59369e+06										5.10176e+06		434091		621630			3.53008e+06	1.63425e+06	3.37507e+08	6.44753e+06
	High	[-].MEQFPK.[E]	1xAcetyl [N-Term]	1	2	P02549-1	P02549-1 [1-6]	P02549-1 1xAcetyl [N-Term]	0	821.386	1		4.58126e-17	3.66332e-17																									2.76991e+06						1.60534e+06	861822	2.48956e+06		799186
	High	[K].RDVTEAIQWIK.[E]		1	13	P02549-1	P02549-1 [271-281]		1	1358.74	0	4.74369e-17	4.58126e-17	3.66332e-17													1.03615e+06	4.08654e+06											34148.5							19242.6	12777.4		608643
	High	[R].LRGLALQR.[Q]		1	5	P02549-1	P02549-1 [249-256]		1	926.589	0	4.74369e-17	4.58126e-17	3.66332e-17													3.78197e+06	3.33783e+06	1.74348e+06										751254							428256		5.12827e+07
	High	[K].VNILTDK.[S]		1	14	P02549-1	P02549-1 [73-79]		0	802.467	1	0.213935	0.007512	0.776442	2.51951e+06		768945				300597	619286				3.77077e+06	1.15454e+08	7.11253e+07	3.71294e+07	594420	513164	1.02632e+06	1.98414e+06	1.29679e+06	2.1022e+07	2.46652e+06	1.18776e+07		2.72105e+07	739326		5.51215e+06	4.35815e+06			2.02133e+07	1.97033e+07	4.3493e+07	1.58486e+07
	High	[K].EPLATRK.[K]		1	28	P02549-1	P02549-1 [780-786]		1	814.478	3	0.757741	0.669486	0.171363	131182	116805	55708.3	128170	4.56929e+06								319508				34908.6	42630.9		288070	728523		7.5474e+06		953384				99495.1			364555	206857	1.47408e+07
	High	[K].DLNTNEPR.[L]		1	116	P02549-1	P02549-1 [1126-1133]		0	958.459	5	0.296525	0.0763151	0.978613						2.1647e+06	5.85326e+06	5.1176e+06	2.30587e+06	3.81472e+06	2.87217e+06	646999	1.52603e+07	2.07853e+07	5.63045e+06	813507		1.63051e+06	3.40738e+07	1.18694e+06	2.05463e+07	7.24704e+06	1.42345e+07	5.22176e+06	5.73314e+07		1.60417e+06	1.64565e+07	1.64733e+07	1.11386e+07	3.37537e+06	1.9408e+07	3.04731e+07	3.76389e+07	8.56275e+06
	High	[K].AEDLFVEFAHK.[A]		1	7	P02549-1	P02549-1 [2041-2051]		0	1305.65	1	0.959535	0.851645	0.771332	310501	386768	1.43115e+06	743058	9.1882e+06	765604	272487	750228	456326	324923	228531	572027	2.76045e+06	1.04682e+07	2.86487e+06	419812	504782	165194	594360	122591	568138	787304	3879.01	764954	775595	1.31994e+06	160724	613420	471963	667917	453647	312517	425674	2.54409e+06	1.46611e+06
	High	[R].RHEGFER.[D]		1	6	P02549-1	P02549-1 [1224-1230]		1	930.454	0
	High	[K].GVSEETLK.[E]		1	130	P02549-1	P02549-1 [2267-2274]		0	862.452	5	0.00309559	0.36991	0.132643	2.85044e+06	1.45535e+06	2.36678e+06	368552	4.26101e+06	354981	2.12345e+06	1.56418e+06		384399		5.72253e+06	7.33693e+07	6.72686e+07	3.80652e+07	2.25558e+06	3.84088e+06	5.00137e+06		2.58688e+06	2.2232e+07	9.33357e+06	1.75322e+07	3.99865e+06	4.30266e+07	340828	1.30736e+06	1.06526e+07	1.37972e+07	3.32613e+06	4.02207e+06	3.74106e+07	2.78252e+07	8.37935e+08	3.54342e+07
	High	[R].QESLVCR.[F]	1xCarbamidomethyl [C6]	1	52	P02549-1	P02549-1 [768-774]		0	891.435	3	0.0984074	0.41552	0.154455			839744				2.54982e+06	856312	206502	109999	338334	1.18427e+06	2.81202e+07	2.8723e+07	1.85422e+07		827937	712975		653036	7.14077e+06	2.43441e+06	3.79923e+06		8.52414e+06	425812	1.4917e+06	1.45109e+06	2.48457e+06			7.97974e+06	3.36355e+06	2.93256e+08	5.87846e+06
	High	[K].RDADDLGK.[W]		1	15	P02549-1	P02549-1 [60-67]		1	889.437	1	4.74369e-17	4.58126e-17	3.66332e-17													1.85721e+06								669075		1.09625e+07						205772			621330	334113	2.87385e+07
	High	[K].KFDEFQK.[D]		1	30	P02549-1	P02549-1 [1119-1125]		1	941.473	2	0.869795	0.815742	0.970072	1.9449e+07	2.49098e+07	3.55104e+07	1.16951e+07	2.32946e+07	1.25493e+07	1.90834e+07	1.56794e+07	9.07663e+06	1.288e+07	1.52113e+07	1.40014e+07	2.42745e+07	6.49003e+07	5.55321e+07	1.17268e+07	1.54295e+07	1.60891e+07	1.55175e+07	8.88316e+06	1.75293e+07	2.27829e+07	1.2825e+07	1.83509e+07	3.07449e+07	2.75911e+07	1.17722e+07	2.01481e+07	1.96072e+07	1.54638e+07	2.12838e+07	3.39934e+07	2.27522e+07	1.31614e+09	5.97948e+07
	High	[R].LMSELEK.[T]	1xOxidation [M2]	1	58	P02549-1	P02549-1 [107-113]		0	865.434	2	0.737138	0.890252	0.995592	5.52651e+06	3.11648e+06	2.58531e+06	1.44311e+06	6.46819e+06	2.40565e+06	1.88406e+06	1.12802e+06	1.89246e+06	2.37925e+06	2.14319e+06	4.68906e+06	1.71235e+07	2.02671e+07	1.30448e+07	2.30902e+06	2.06278e+06	3.67257e+06	2.53022e+06	2.18374e+06	7.64809e+06	6.4759e+06	2.84722e+06	1.88504e+06	9.01113e+06	2.99276e+06	3.47193e+06	2.64307e+06	5.38648e+06	1.43648e+06	3.3548e+06	8.43646e+06	7.37085e+06	4.31681e+08
	High	[K].DLVASEGLFHSHK.[G]		1	6	P02549-1	P02549-1 [295-307]		0	1439.73	2	4.74369e-17		3.66332e-17													698896		484263	312776	220817	256403		44866.2	62771.4											823501	488274	8.35008e+07
	High	[K].SRLMSELEK.[T]		1	9	P02549-1	P02549-1 [105-113]		1	1092.57	0	4.74369e-17	4.58126e-17	3.66332e-17													1.04604e+06		1.71858e+06									362470			284006
	High	[K].AQLIDER.[T]		1	60	P02549-1	P02549-1 [1487-1493]		0	844.452	3	0.953243	0.94622	0.753326	1.02643e+08	8.25252e+07	5.72518e+07	5.04262e+07	1.92529e+08	3.17506e+07	2.86478e+07	2.14068e+07	1.45063e+07	2.67724e+07	2.60814e+07	2.13034e+07	1.48439e+08	2.44496e+08	1.04305e+08	9.7622e+06	2.52427e+07	2.18888e+07	2.61598e+07	2.09059e+07	5.33845e+07	3.93234e+07	3.33138e+07	4.08543e+07	1.01818e+08	6.32596e+07	6.15183e+06	2.98799e+07	3.96609e+07	1.87415e+07	1.76969e+07	7.59918e+07	5.91686e+07	9.06978e+08	1.50181e+08
	High	[K].EQLEQLK.[E]		1	55	P02549-1	P02549-1 [1580-1586]		0	887.483	7	0.942852	0.774523	0.946454	1.71807e+07	1.08871e+07	1.02861e+07	9.53115e+06	1.31561e+07	1.32885e+07	4.99209e+06	8.71934e+06	4.95684e+06	3.15336e+06	2.77304e+06	8.83088e+06	4.77561e+07	5.81704e+07	2.55905e+07	5.8403e+06	9.86804e+06	7.44955e+06	7.40989e+06	9.06671e+06	2.503e+07	8.16694e+06	1.81746e+07	5.08911e+06	3.36729e+07	7.01272e+06	2.56214e+06	1.40442e+07	1.13917e+07	4.13392e+06	4.9405e+06	2.24374e+07	3.21032e+07	7.11436e+06	2.25211e+07
	High	[R].SLLDRAEER.[R]		1	14	P02549-1	P02549-1 [1066-1074]		1	1088.57	2	0.876263	0.208111	0.801315	2.39822e+06	1.94177e+06	3.97213e+06	902392	4.45817e+06		567461			649867	1.17516e+06		1.63614e+07	4.13544e+06	6.53384e+06			639182	561478		993432	945459	1.06024e+06	1.72774e+06	2.7388e+06		361180	265048		244399	374933	1.74286e+06	931016	2.69301e+06	6.10163e+06
	High	[K].AIAAWK.[L]		1	11	P02549-1	P02549-1 [1916-1921]		0	659.388	1			3.66332e-17																																		5.54488e+06
	High	[R].YAALLK.[R]		1	18	P02549-1	P02549-1 [2010-2015]		0	678.418	1	4.74369e-17	0.761126	0.996569			432329				180505																						477285
	High	[R].LAHDEFPMLPQRR.[R]	1xOxidation [M8]	1	1	P02549-1	P02549-1 [1034-1046]		1	1625.82	0
	High	[K].HQLLER.[E]		1	37	P02549-1	P02549-1 [1649-1654]		0	795.447	1	0.969825	0.231044	0.596616	1.595e+06			247230	1.90207e+06		6.12596e+06	2.6086e+06	1.95291e+06		2.69568e+06	1.09291e+06	1.22368e+08	1.39772e+08	3.84656e+07	1.6755e+06	1.38967e+06	2.96251e+06		2.40418e+06	765926	1.59321e+06	821760	884378	4.13847e+07		5.097e+06	5.52674e+06	8.31693e+06	2.29059e+06	1.18739e+06	2.61114e+07	2.00858e+07	2.2325e+09	4.29746e+07
	High	[K].QQVFEK.[E]		1	16	P02549-1	P02549-1 [623-628]		0	778.409	0	4.74369e-17		3.66332e-17												488398		3.83066e+06					533150	721629	812581		483826										1.60598e+07
	High	[R].DALR.[E]		1	7	P02549-1	P02549-1 [565-568]		0	474.267	1	4.74369e-17	4.58126e-17	3.66332e-17												797355		3.2145e+06		1.08814e+06		829670	464477			1.49942e+06		1.21897e+06				865183	1.12306e+06	652529	923893
	High	[K].AHIEELR.[H]		1	20	P02549-1	P02549-1 [131-137]		0	867.468	1	0.979597	0.996478	0.981651	4.58928e+07	1.75795e+07	8.84682e+06	1.11158e+07	1.05519e+07	1.04751e+07	5.64687e+06	5.75245e+06	7.56854e+06	6.06883e+06	8.29387e+06	5.64899e+06	3.39277e+07	3.81229e+07	2.20848e+07	8.44947e+06	1.06461e+07	5.13213e+06	5.66881e+06	5.00855e+06	6.1554e+06	1.04814e+07	5.343e+06	8.72144e+06	1.90559e+07	1.06509e+07	7.80438e+06	6.85594e+06	1.60282e+07	4.72648e+06	6.0056e+06	9.30928e+06	5.20192e+06	5.36792e+08	2.84584e+07
	High	[R].VSSQDYGR.[D]		1	3	P02549-1	P02549-1 [1736-1743]		0	911.422	0
	High	[K].ESLNEAQK.[F]		1	8	P02549-1	P02549-1 [1283-1290]		0	918.453	0	0.303439	0.688262	0.543547	1.71871e+07	4.19145e+06	4.58905e+06	8.43673e+06	1.07637e+07	623855	9.89828e+06	6.24507e+06	7.21508e+06	8.91172e+06	7.46353e+06	984086				3.00311e+06	1.03492e+06	2.20755e+06	3.02158e+06	2.55412e+06	2.36337e+06	4.37429e+06	1.52802e+06	6.44479e+06	5.82218e+06		4.42062e+06	3.9792e+06	7.43947e+06	3.92207e+06	3.88688e+06	7.60782e+06	3.5321e+06
	High	[K].GDVLTLLSSINK.[D]		1	2	P02549-1	P02549-1 [1001-1012]		0	1259.72	0			3.66332e-17																																7254.71		522927
	High	[R].RQEVLTR.[Y]		1	8	P02549-1	P02549-1 [28-34]		1	901.521	0
	High	[K].IEALNEK.[T]		1	197	P02549-1	P02549-1 [1903-1909]		0	816.446	3	0.855984	0.73976	0.785422		915065	1.04153e+06		3.05687e+06	1.21096e+06	1.24536e+06	1.53324e+06	403958	633022	1.38388e+06		888486	2.3696e+06		329418		1.037e+06			637005	566471		2.07482e+06	3.8636e+07	1.72005e+06		1.0684e+07	9.83441e+06	753388	1.69181e+06	634935		1.07723e+07
	High	[K].EIQAMK.[R]	1xOxidation [M5]	1	3	P02549-1	P02549-1 [2205-2210]		0	735.371	0
	High	[R].NLAVMSDK.[V]	1xOxidation [M5]	1	65	P02549-1	P02549-1 [312-319]		0	893.44	5	0.0300121	0.0728203	0.184097							336373	3.03545e+06	1.18312e+06		733154	1.07366e+06	7.21568e+06	2.81004e+07	5.85134e+06	1.78429e+06	8.76053e+06	1.52811e+06	320331	985829	1.15135e+07	5.72196e+06	5.72722e+06	1.90766e+06	1.67043e+07	1.08531e+07	1.05365e+06	5.28461e+06	5.55143e+06	3.18977e+06	1.96541e+06	1.0715e+07	1.59285e+07	3.17808e+07	3.28709e+06
	High	[K].QLPLQK.[A]		1	6	P02549-1	P02549-1 [2035-2040]		0	726.451	0
	High	[R].VAER.[G]		1	4	P02549-1	P02549-1 [42-45]		0	474.267	1	0.131405	4.58126e-17	0.033266	2.27725e+06	3.08453e+06	1.85962e+06														444763																65129.8
	High	[K].WIMEK.[V]	1xOxidation [M3]	1	4	P02549-1	P02549-1 [68-72]		0	722.354	0
	High	[R].IQEITER.[G]		1	64	P02549-1	P02549-1 [849-855]		0	888.479	4	4.74369e-17	4.58126e-17	3.66332e-17													563326	6.06882e+06			167966										1.37024e+07	429383	339596			5.38274e+07		1.28822e+09	2.52011e+06
	High	[K].TPSLAK.[A]		1	6	P02549-1	P02549-1 [1910-1915]		0	616.366	0	0.984319	0.983174	0.717995		1.73473e+06		2.73334e+06		2.0908e+06		1.0392e+06	726727	1.16401e+06	1.05959e+06					788996						2.21365e+06			1.33243e+06			1.26882e+06	1.0899e+06			2.09711e+06
	High	[K].DIQNLK.[S]		1	9	P02549-1	P02549-1 [612-617]		0	730.409	0	4.74369e-17	4.58126e-17	0.218924					407884
	High	[R].FEALK.[E]		1	4	P02549-1	P02549-1 [775-779]		0	607.345	0			3.66332e-17																																		7.67947e+06
	High	[K].SRLMSELEK.[T]	1xOxidation [M4]	1	8	P02549-1	P02549-1 [105-113]		1	1108.57	0
	High	[R].SCLR.[G]	1xCarbamidomethyl [C2]	1	1	P02549-1	P02549-1 [2298-2301]		0	535.266	1	4.74369e-17	4.58126e-17	0.588497								842406	1.11443e+06
	High	[K].LLNR.[H]		1	12	P02549-1	P02549-1 [831-834]		0	515.33	2	0.0022108	0.00175249	6.74205e-07			1.0285e+06						355096			24170.1				9584.05	3.96456e+06		27067.4		18029.6		14917.1			83060.4		9818.63		225033	30954.2			2.87418e+06
	High	[K].NWINK.[K]		1	1	P02549-1	P02549-1 [596-600]		0	674.362	0			3.66332e-17																																628900
	High	[K].IITVDK.[T]		1	2	P02549-1	P02549-1 [532-537]		0	688.424	0
	High	[R].QLQK.[D]		1	2	P02549-1	P02549-1 [2080-2083]		0	516.314	1			3.66332e-17
	High	[K].ERVAER.[G]		1	14	P02549-1	P02549-1 [40-45]		1	759.411	4	0.918418	0.446587	0.41913				72459	133204	72933.5	8199.87	7300.53	13046.4	12261	18705.9	34302.2	28579.7	82778.3	60848.1	33031.4	5947.27	18464.3	51490	43725.1	29057	39307.3		215448		323483		17106.7	23025.3	171205	34258	32996	17320.7	1.54089e+07	1.47807e+06
	High	[R].REEPGNITQRQEQIENQYR.[S]		1	1	P02549-1	P02549-1 [1047-1065]		2	2388.17	0
	High	[K].GLER.[N]		1	1	P02549-1	P02549-1 [308-311]		0	474.267	1	0.959895	0.807072	0.873958	7.38096e+06	8.62677e+06	5.48718e+06	3.58498e+06	6.60936e+06	8.15036e+06	2.67922e+06	2.42805e+06	3.14802e+06	4.20112e+06	2.40075e+06	1.96841e+06	3.43814e+06	1.27954e+07	6.22122e+06	2.37161e+06	3.75672e+06	4.37866e+06	4.48212e+06	3.12127e+06	2.43745e+06	2.82998e+06	2.83497e+06	3.68182e+06	2.59465e+06	4.15766e+06	1.65468e+06	2.70317e+06	5.05776e+06	3.01015e+06	2.69853e+06	2.5664e+06	2.6754e+06		3.95349e+06
	High	[R].DINK.[V]		1	2	P02549-1	P02549-1 [1136-1139]		0	489.267	0
	High	[K].KRDDLDK.[A]		1	5	P02549-1	P02549-1 [1435-1441]		2	889.474	1			3.66332e-17																																		1.59421e+07
	High	[R].LRDINK.[V]		1	17	P02549-1	P02549-1 [1134-1139]		1	758.452	0
	High	[R].GLALQR.[Q]		1	2	P02549-1	P02549-1 [251-256]		0	657.404	0			3.66332e-17
	High	[R].VLDRWK.[A]		1	10	P02549-1	P02549-1 [1478-1483]		1	816.473	1	6.61754e-08	0.129242	0.817049						883229							1.75232e+07	3.26638e+07	3.71422e+06										3.74664e+06							2.64543e+06	729932	4.32964e+07	5.07723e+06
	High	[K].VEAADHQGIVPAVYVRR.[L]		1	1	P02549-1	P02549-1 [1017-1033]		1	1880.01	0
	High	[K].DLIASK.[K]		1	5	P02549-1	P02549-1 [824-829]		0	646.377	1	0.937452	0.999895	0.807374	638614	310438	432430		715044						417228	116288	928882	1.95616e+06	1.87015e+06	358526			97725.1		1.61681e+06	378692		478506		364998	773926		494277	183683	338591		249893		826460
	High	[R].EMLAREDALK.[D]	1xOxidation [M2]	1	6	P02549-1	P02549-1 [1655-1664]		1	1191.6	1	0.118032	0.749354	0.691372		1.65729e+06				207175				324174			6.57977e+06								702772				4.47011e+06			521357	553778	693248	230369		1.85749e+06
	High	[R].LMSELEK.[T]		1	5	P02549-1	P02549-1 [107-113]		0	849.439	1	0.20253	1.82474e-05	0.072204									297641	487089			394029	3.30923e+06	2.71084e+06								1.01403e+06	3.56417e+06	4.47055e+06	6.57889e+06	6.98788e+06		5.76255e+06			8.70313e+06	5.49235e+06		2.11801e+07
	High	[K].LQAVK.[L]		1	1	P02549-1	P02549-1 [1370-1374]		0	558.361	0
	High	[K].ELAK.[A]		1	5	P02549-1	P02549-1 [1806-1809]		0	460.277	2	0.750178	0.986838	0.91238	204596	287249	405054	410831	735684	1.07829e+06	643119	928354	720703	414862	638272	627486				333443							271127	954665	552561	617902	185842	727909	831086	852094	255197			4.97089e+07
	High	[R].DLQGVQNLLK.[K]		1	7	P02549-1	P02549-1 [1744-1753]		0	1127.64	0	0.754664	0.918466	0.978685	97825	119835	521240	107634	79660.5	58769.6	14865.6	42724.9	3234.34	64325.6	12299.2	155279	2.62889e+07	1.693e+07	7.68321e+06	38983	42439.6	55422.2	244543	83351.5	31137.8	208973	2.32629e+06		7.02333e+06		13116.5	537532	1.02482e+06	16486.1	9487.01	7066.77	2.01492e+06	72290.4	5.39504e+06
	High	[R].LPEITDLK.[D]		1	4	P02549-1	P02549-1 [1985-1992]		0	928.535	0	0.0603943	0.331325	0.493042	817679											131958				57884.6				89612.3	573428	535511	58104.2		7.60102e+06			2.35296e+06	2.24405e+06			4.849e+06	4.28511e+06		5.40003e+06
	High	[K].RDDLDK.[A]		1	1	P02549-1	P02549-1 [1436-1441]		1	761.379	0			3.66332e-17
	High	[R].EADDTK.[E]		1	1	P02549-1	P02549-1 [1191-1196]		0	678.294	1	0.986604	0.963067	0.800179	7.38514e+06			2.04709e+06				1.01722e+06			1.0001e+06	682518	1.49969e+06	4.66859e+06	1.35692e+06	1.58259e+06			461333					1.0003e+06		2.46417e+06		700296	2.64975e+06					2.48201e+07	1.25797e+06
	High	[R].DLVPLGDK.[V]		1	3	P02549-1	P02549-1 [1231-1238]		0	856.477	0	0.978406	0.100108	0.940002	427925							218307				184817		2.75979e+07	9.62488e+06			106915	133012	214450		1.28092e+06	555412		1.35724e+07			1.24243e+06	1.53269e+06			7.9369e+06	5.96385e+06	3.25749e+08	5.63605e+06
	High	[K].TATK.[L]		1	7	P02549-1	P02549-1 [538-541]		0	420.245	1	0.762765	0.956195	0.744945	1.45745e+06	6.88591e+06	7.94857e+06	1.28703e+06	4.36298e+06	1.6197e+07	7.62197e+06	6.85812e+06	4.38922e+06	4.80271e+06	5.55615e+06	5.46962e+06	1.07563e+07	2.13579e+07	1.05648e+07	3.38915e+06	7.17314e+06	9.10058e+06	5.01116e+06	6.37066e+06	8.34946e+06	1.01421e+07	7.16068e+06	6.2308e+06	6.62658e+06	9.07691e+06	3.8249e+06	3.94932e+06	5.08423e+06	5.99386e+06	6.20578e+06	7.05105e+06	7.50218e+06		4.52037e+06
	High	[K].FYLFLSK.[A]		1	1	P02549-1	P02549-1 [1291-1297]		0	917.513	1	0.984254	0.934618	0.783805	4.35813e+06	3.66689e+06	2.93897e+06		8.80408e+06	1.11746e+06	580085	812637	407846	1.51496e+06	1.30136e+06	441699	4.36486e+06	8.12675e+06	3.06749e+06	353320	1.35775e+06	1.15455e+06	4.594e+06	436579	1.73618e+06	1.40282e+06	304197		1.23374e+06	1.81279e+06		1.10683e+06	376301	1.15454e+06	783033	787962	1.59718e+06		1.04746e+07
	High	[R].LTHK.[E]		1	36	P02549-1	P02549-1 [2291-2294]		0	498.303	5	0.957059	0.40328	0.978231	2.5911e+06	1.82076e+06	1.70051e+06	1.42568e+06	3.39871e+06	1.17593e+07	4.93314e+06	479507	326509	305733	180794	1.08513e+06		1.95404e+06	708305	672144	1.69602e+06	2.64197e+06	445709	994188	2.06332e+06	5.41385e+06	1.42104e+06	893359	374946	863371	401831	1.51327e+06	351803	1.0655e+06	563095	654541	1.03765e+06	1.62868e+07	674847
	High	[K].AENTGVELDDVWELQKK.[F]		1	1	P02549-1	P02549-1 [1103-1119]		1	1973.98	0
	High	[R].DGLLARR.[D]		1	1	P02549-1	P02549-1 [558-564]		1	800.474	0
	High	[K].FLDAVDPGR.[K]		1	2	P02549-1	P02549-1 [2322-2330]		0	989.505	0	0.102174	0.0440922	0.443504	1.60445e+06				854510		302414		547901	537121	186874	13232	775323				172235	31766.7	48165.1	65945	59617.8		80122.4	178321					43113.7	12991.7	288927	164861	172153	7.25229e+06
	High	[R].VLDR.[W]		1	1	P02549-1	P02549-1 [1478-1481]		0	502.298	0
	High	[K].EEAR.[Q]		1	3	P02549-1	P02549-1 [2148-2151]		0	504.241	0
	High	[R].GDCGDTLAATQSLLMK.[H]	1xCarbamidomethyl [C3]	1	1	P02549-1	P02549-1 [1845-1860]		0	1680.79	0			3.66332e-17																																		1.26224e+06
	High	[K].KAENTGVELDDVWELQK.[K]		1	1	P02549-1	P02549-1 [1102-1118]		1	1973.98	0	4.74369e-17	0.522366	0.633689		1.25796e+06	961360						272999																	646846		388257	192968	561848	344987		282219
	High	[R].FNTSIR.[D]		1	1	P02549-1	P02549-1 [1612-1617]		0	737.394	0
	High	[R].LEGELVAHEPAIQNVLDMAEK.[L]		1	1	P02549-1	P02549-1 [1758-1778]		0	2306.17	0
	High	[K].YSTIGLAQQWDQLYQLGLR.[M]		1	4	P02549-1	P02549-1 [2233-2251]		0	2253.17	1	0.16833	0.0201327	0.0821204									23910.8				103985					421891	245342						136004		169657	649638	117561	917387	858766	36907.4
	High	[K].ESLLLQK.[L]		1	2	P02549-1	P02549-1 [580-586]		0	830.498	0	0.493181	0.998719	0.0336325	209764	306598		250144					41433.3		51387.5	895415	361486			432561		286074	876187	552472	749509	1.06484e+06			134521	677170					193005
	High	[R].TNDK.[G]		1	1	P02549-1	P02549-1 [1596-1599]		0	477.23	0	4.74369e-17	0.221182	0.946296	504615						162442		86401	213212															1.19861e+06			571134	752834		195047	575374	531514
	High	[R].AARR.[Q]		1	3	P02549-1	P02549-1 [888-891]		1	473.294	0
	High	[R].LPEITDLKDK.[L]		1	1	P02549-1	P02549-1 [1985-1994]		1	1171.66	0
	High	[R].LAHDEFPMLPQR.[R]		1	1	P02549-1	P02549-1 [1034-1045]		0	1453.73	0	4.74369e-17		3.66332e-17													979466																					5.16507e+06
	High	[K].QALTPEQVSFCATHMQQYMDPR.[G]	1xCarbamidomethyl [C11]; 2xOxidation [M15; M19]	1	5	P02549-1	P02549-1 [2378-2399]		0	2670.17	0	4.74369e-17	4.58126e-17	3.66332e-17													3.3144e+06	3.58141e+06											429548							148544	93314.7	3.8294e+07
P01023	A2M	alpha-2-macroglobulin [OS=Homo sapiens]	n/a	High		0	62	17343	90	1474	163.2	6.46	10866.1	cell differentiation;cell organization and biogenesis;metabolic process;regulation of biological process;response to stimulus;transport	cytosol;extracellular;organelle lumen	enzyme regulator activity;protein binding	Pf00207, Pf01835, Pf07677, Pf07678, Pf07703, Pf10569, Pf11974, Pf13249	2	12	ENSG00000175899.14	Complement and coagulation cascades	Platelet degranulation ; Degradation of the extracellular matrix; Rho GTPase cycle; HDL assembly; Intrinsic Pathway of Fibrin Clot Formation	Complement and Coagulation Cascades	17	10	2.6564e+09	2.51326e+09	4.36715e+09	2.92938e+09	4.86975e+09	2.01054e+09	1.94002e+09	9.83223e+08	1.35314e+09	7.50768e+08	1.44191e+09	8.58954e+08	4.15562e+09	8.4931e+09	4.89334e+09	8.04202e+08	1.33738e+09	2.17582e+09	1.42072e+09	2.06078e+09	3.04953e+09	1.68273e+09	1.93313e+09	3.8497e+09
	Confidence	Annotated Sequence	Modifications	# Protein Groups	# PSMs	Master Protein Accessions	Positions in Master Proteins	Modifications in Master Proteins	# Missed Cleavages	Theo. MH+ [Da]	# Razor Quan Results	Abundance Ratio Adj. P-Value: (CP, Sample) / (Control, Control)	Abundance Ratio Adj. P-Value: (IPMN, Sample) / (Control, Control)	Abundance Ratio Adj. P-Value: (PA, Sample) / (Control, Control)	Abundances (Normalized): F1: Control, Control, Patient01	Abundances (Normalized): F2: Control, Control, Patient02	Abundances (Normalized): F3: Control, Control, Patient03	Abundances (Normalized): F4: Control, Control, Patient04	Abundances (Normalized): F5: Control, Control, Patient05	Abundances (Normalized): F6: Control, Control, Patient06	Abundances (Normalized): F7: Control, Control, Patient07	Abundances (Normalized): F8: Control, Control, Patient08	Abundances (Normalized): F9: Control, Control, Patient09	Abundances (Normalized): F10: Control, Control, Patient10	Abundances (Normalized): F11: Control, Control, Patient11	Abundances (Normalized): F12: Sample, CP, Patient12	Abundances (Normalized): F13: Sample, CP, Patient13	Abundances (Normalized): F14: Sample, CP, Patient14	Abundances (Normalized): F15: Sample, CP, Patient15	Abundances (Normalized): F16: Sample, CP, Patient16	Abundances (Normalized): F17: Sample, CP, Patient17	Abundances (Normalized): F18: Sample, CP, Patient18	Abundances (Normalized): F19: Sample, CP, Patient19	Abundances (Normalized): F20: Sample, CP, Patient20	Abundances (Normalized): F21: Sample, CP, Patient21	Abundances (Normalized): F22: Sample, CP, Patient22	Abundances (Normalized): F23: Sample, CP, Patient23	Abundances (Normalized): F24: Sample, IPMN, Patient24	Abundances (Normalized): F25: Sample, IPMN, Patient25	Abundances (Normalized): F26: Sample, IPMN, Patient26	Abundances (Normalized): F27: Sample, IPMN, Patient27	Abundances (Normalized): F28: Sample, IPMN, Patient28	Abundances (Normalized): F29: Sample, IPMN, Patient29	Abundances (Normalized): F30: Sample, IPMN, Patient30	Abundances (Normalized): F31: Sample, IPMN, Patient31	Abundances (Normalized): F32: Sample, PA, Patient32	Abundances (Normalized): F33: Sample, PA, Patient33	Abundances (Normalized): F34: Sample, PA, Patient34	Abundances (Normalized): F35: Sample, PA, Patient35
	High	[K].YSDASDCHGEDSQAFCEK.[F]	2xCarbamidomethyl [C7; C16]	1	523	P01023	P01023 [272-289]		0	2105.78	1	0.860486	0.889689	0.814635	8.3371e+07	4.62195e+07	1.11777e+08	7.70954e+07	1.3355e+08	4.39131e+07	2.66338e+07	1.16419e+07	2.22293e+07	1.258e+07	3.2594e+07	2.27394e+07	4.88373e+07	1.29545e+08	8.80338e+07	1.24994e+07	2.2425e+07	3.81114e+07	2.4144e+07	3.32155e+07	5.02518e+07	2.55803e+07	1.37115e+07	6.84268e+07	3.77291e+07	6.30545e+07	1.88369e+07	8.43678e+06	3.84453e+07	2.36586e+07	3.01504e+07	3.20353e+07	5.81476e+07	3.00357e+08	9.81037e+07
	High	[K].QQNAQGGFSSTQDTVVALHALSK.[Y]		1	310	P01023	P01023 [1241-1263]		0	2387.19	1	0.689567	0.600822	0.709908	5.51052e+06	3.6805e+06	1.03334e+07	5.18186e+06	1.74515e+07	787738	761247	1.21981e+06	991999	1.07263e+06	1.1441e+06	1.09204e+06	2.06307e+07	5.47559e+07	1.27505e+07	1.3098e+06	2.74738e+06	2.35398e+06	2.28626e+06	4.09297e+06	4.34025e+06	490880	1.62403e+06	7.33183e+06	3.44038e+06	8.78102e+06	942870	1.40015e+06	2.75034e+06	2.65578e+06	1.68044e+06	1.99268e+06	5.40704e+06	1.95801e+06	6.17858e+06
	High	[K].TAQEGDHGSHVYTK.[A]		1	750	P01023	P01023 [1134-1147]		0	1529.7	17	0.905391	0.202152	0.269067	8.32857e+07	2.25106e+08	4.12811e+08	2.02186e+08	3.42561e+07	1.9951e+08	1.19911e+08	5.26201e+07	8.36013e+07	4.27056e+06	1.16562e+08	2.25099e+07	1.01826e+07	1.96068e+07	9.11294e+06	6.11689e+07	6.58327e+07	1.64874e+08	1.00473e+08	9.75301e+07	2.17399e+08	1.30302e+08	1.00139e+08	1.96091e+08	4.32291e+07	2.19944e+07	1.11501e+07	3.39035e+07	5.35138e+07	9.58185e+07	5.63044e+07	1.92882e+07	2.62334e+08	1.23184e+08	1.48206e+07
	High	[R].AVDQSVLLMKPDAELSASSVYNLLPEK.[D]	1xOxidation [M9]	1	198	P01023	P01023 [599-625]		0	2933.52	0	0.80849	0.957378	0.941159	510098	540448	1.27294e+06	1.15356e+06	819851	620611	452256	94780.2	137275	196085	150032	236423	3.73257e+06	2.07855e+06	4.8235e+06	402137	1.06975e+06	1.69061e+06	564389	457330	1.58282e+06	41872.3	819650	666356	511570	1.17132e+06	119132	1.10911e+06	558287	560307	346720	281169	1.81331e+06	2.8349e+06	3.37981e+06
	High	[K].PQYMVLVPSLLHTETTEK.[G]	1xOxidation [M4]	1	189	P01023	P01023 [29-46]		0	2102.08	13	0.338267	0.670074	0.674394	4.69836e+06	5.84616e+06	2.9351e+06	3.49862e+06	1.41669e+07	322635	3.85086e+06	3.77442e+06	1.84037e+06	2.34165e+06	669623	1.44242e+06	2.66116e+07	3.97398e+07	2.17324e+07	1.15104e+06	2.73985e+06	1.27267e+07	7.99812e+06	6.33367e+06	1.76146e+07	7.45618e+06	7.37604e+06	4.36012e+06	2.0452e+06	5.18248e+06	3.50116e+06	353207	1.68354e+06	1.28759e+06	955868	3.07452e+06	3.71604e+06	1.05241e+08	2.78042e+07
	High	[K].LHTEAQIQEEGTVVELTGR.[Q]		1	192	P01023	P01023 [320-338]		0	2110.08	1	0.857027	0.684824	0.275024	1.12782e+06	956460	1.36055e+06	1.05936e+06	3.68385e+06	940889	281402	159102		6848.33	161745	211762	2.70675e+06	7.20661e+06	1.73668e+06	183688	764712		1.26598e+06	253260	289661	27500.9	598400	1.27371e+06	444285	1.34948e+06	360502	31523.4	504831	486916	246522	281068	538968	1.85615e+07	2.92773e+06
	High	[K].PDAELSASSVYNLLPEK.[D]		1	149	P01023	P01023 [609-625]		0	1832.93	2	0.942852	0.520342	0.755039	1.05329e+06	737215	872591	773137	1.49041e+06	1.39411e+06	84272.5	172797	310280	169846	343282	507778	850904	2.14738e+06	805355	356804	910720	1.01981e+06	917166	1.9658e+06	856958	1.49088e+06	1.56617e+06	1.40105e+06	338422	705817	226358	154108	397221	262957	246273	238318	1.09358e+06	1.70617e+06	2.52019e+06
	High	[K].QFSFPLSSEPFQGSYK.[V]		1	342	P01023	P01023 [189-204]		0	1848.88	1	0.27489	0.958655	0.331131	1.51607e+06	1.49735e+06	1.82764e+06	1.64965e+06	2.69789e+06	521738	365500	365109	276248	460230	177553	424762	3.69906e+06	1.52893e+07	3.20159e+06	348948	720819	2.30611e+06	2.00503e+06	2.33501e+06	1.33939e+06	618438	3.02631e+06	1.33465e+06	537194	970967	608417	169774	418536	632220	365683	663758	1.28595e+06	4.53206e+06	3.85589e+06
	High	[K].DNSVHWERPQK.[P]		1	220	P01023	P01023 [1178-1188]		0	1395.68	16	0.850422	0.968587	0.78707	8.19956e+07	5.63175e+07	6.85159e+07	4.49495e+07	2.41182e+08	2.98354e+07	3.8248e+07	2.40668e+07	1.93425e+07	1.72086e+07	3.14631e+07	8.07474e+06	1.01504e+08	3.17169e+08	1.59467e+08	1.26922e+07	2.34481e+07	2.6217e+07	1.82324e+07	1.14453e+07	3.55156e+07	3.96336e+07	1.39949e+07	6.86097e+07	4.11121e+07	5.13924e+07	2.69571e+07	1.7051e+07	3.84942e+07	2.74285e+07	2.97104e+07	3.82191e+07	5.6295e+07	6.48309e+08	1.78997e+08
	High	[K].HYDGSYSTFGER.[Y]		1	65	P01023	P01023 [1020-1031]		0	1418.6	4	0.931918	0.963067	0.679931	1.91849e+06	3.86459e+06	1.54892e+06	2.24646e+06	8.86121e+06	5.95725e+06	1.38011e+06	1.12136e+06	824594	3.93293e+06	498363	1.68445e+06	2.19482e+07	7.64993e+07	2.27339e+07	1.23228e+06	3.29354e+06	490965	5.99572e+06	1.12563e+06		2.49512e+06	1.33384e+06	6.57841e+06	2.11528e+06	5.40912e+06	1.063e+07	1.34383e+06	2.21869e+06	1.91854e+06	1.89112e+06	4.87692e+06	3.29095e+06	2.7846e+07	2.66078e+07
	High	[R].VSVQLEASPAFLAVPVEK.[E]		1	352	P01023	P01023 [824-841]		0	1884.05	4	0.666206	0.901001	0.99804	6.00799e+06	3.70744e+06	1.07527e+07	7.38978e+06	6.37774e+06	2.53544e+06	3.45344e+06	1.31106e+06	1.83958e+06	1.72837e+06	1.87898e+06	2.92585e+06	7.69437e+06	1.57643e+07	1.21876e+07	2.65667e+06	2.57278e+06	3.24781e+06	5.2208e+06	5.42661e+06	5.78005e+06	8.44715e+06	4.06402e+06	4.07386e+06	2.80888e+06	4.91057e+06	1.26996e+06	2.63614e+06	3.25886e+06	2.42243e+06	1.7454e+06	1.3857e+06	7.14162e+06	1.38042e+07	2.10367e+07
	High	[R].TEHPFTVEEFVLPK.[F]		1	67	P01023	P01023 [215-228]		0	1672.86	1	0.938153	0.989704	0.971118	1.67787e+06	2.21971e+06	769669	4.3039e+06	750582	1.55647e+06	49033.8	58626.6	927766	3.35416e+06	649229		1.2773e+06	1.18429e+06	1.11597e+06	9705.96		1.92401e+06	4.42722e+06	461825	2.18592e+06	2.10166e+06	51446.8	1.6452e+06	307268	1.36465e+06	578172	921162	314549	3.56446e+06	700716	1.70449e+06	1.23921e+06	1.77519e+06
	High	[K].MVSGFIPLKPTVK.[M]	1xOxidation [M1]	2	142	P01023; P20742	P01023 [1385-1397]; P20742 [1391-1403]		0	1432.82	6	0.906836	0.998843	0.488281	1.34563e+06	2.17599e+06	1.92773e+06	1.37353e+06	2.41347e+06	1.42785e+06	2.4179e+06	2.54947e+06	814962	675809	868366	729645	5.23633e+07	1.33963e+08	2.41498e+07	413401	2.62616e+06	696982	6.47528e+06	48161.8	987840	1.48145e+06	3.78933e+06	1.88441e+06	1.27456e+06	2.48406e+06	3.78557e+06	651254	1.65133e+06	1.21909e+06	1.04156e+06	1.35442e+06	1.80196e+06	3.9068e+07	5.00528e+07
	High	[K].EQAPHCICANGR.[Q]	2xCarbamidomethyl [C6; C8]	1	429	P01023	P01023 [842-853]		0	1412.62	10	0.953243	0.90206	0.962812	1.21951e+08	5.31077e+07	1.62891e+08	8.55367e+07	1.89465e+08	4.9946e+07	5.44182e+07	1.90883e+07	2.61968e+07	1.85043e+07	4.27869e+07	3.10948e+07	9.2509e+07	2.11468e+08	1.48385e+08	2.34053e+07	2.56079e+07	5.49586e+07	3.61937e+07	5.14192e+07	7.24704e+07	4.62524e+07	3.1327e+07	6.95515e+07	5.07996e+07	8.44169e+07	2.97891e+07	1.91729e+07	5.02339e+07	2.57673e+07	3.52581e+07	3.39114e+07	8.29861e+07	3.5621e+08	1.40764e+08
	High	[K].AGAFCLSEDAGLGISSTASLR.[A]	1xCarbamidomethyl [C5]	2	388	P01023; P20742	P01023 [767-787]; P20742 [773-793]		0	2083.01	6	0.468501	0.956195	0.184551	972783	497353	1.39821e+06	1.49533e+06	1.72051e+06	866956	330927	247287	185965	115706	494356	218791	982572	1.78575e+06	1.64744e+06	406925	530183	2.28359e+06	2.8998e+06	2.89236e+06	1.2123e+06	973366	1.59914e+06	1.02026e+06	97559.1	503378	349517	65635.5	687903	485329	323887	141645	2.67127e+06	3.6305e+06	3.37794e+06
	High	[R].TGTHGLLVK.[Q]		1	239	P01023	P01023 [508-516]		0	925.547	11	0.06086	0.704826	0.177153	3.52622e+07	1.86446e+07	2.0344e+07	2.41193e+07	9.94837e+07	1.67274e+07	4.78701e+07	8.66907e+07	3.16809e+07	2.48283e+07	3.68516e+07	1.41827e+07	1.12558e+08	2.22088e+08	1.57917e+08	5.25669e+06	1.68715e+07	7.05992e+06	1.00143e+07	4.63719e+06	7.33681e+06	5.31112e+06	1.27063e+06	1.32105e+08	6.08505e+07	9.87828e+07	3.64892e+07	9.11904e+06	5.89939e+07	3.52602e+07	3.70881e+07	5.12384e+07	7.26766e+07	4.55443e+08	2.1567e+08
	High	[R].LVHVEEPHTETVRK.[Y]		1	160	P01023	P01023 [720-733]		1	1673.9	6	0.421849	0.98179	0.763143	2.88067e+06	8.24891e+06	1.16495e+07	4.0272e+06	2.2586e+07	8.36539e+06	2.33578e+06	2.46652e+06		3.17077e+06	929798	2.37828e+06	8.6261e+07	4.19563e+08	3.621e+07	3.85159e+06	3.88889e+06	3.52532e+06	9.84259e+06	5.32103e+06	6.53761e+06	1.52084e+07	6.84885e+06	2.74129e+06	6.42314e+06	5.23434e+06	3.76428e+07	592922	3.85229e+06	378102	1.39415e+06	6.39447e+06	2.13678e+06	5.6182e+08	4.68402e+07
	High	[K].SSSNEEVMFLTVQVK.[G]		1	23	P01023	P01023 [94-108]		0	1697.84	0	0.811295	0.357908	0.470496	11960.6								2533.44	3949.22					12071.7												64345.9		29263.4		19890.3				163206
	High	[K].EEFPFALGVQTLPQTCDEPK.[A]	1xCarbamidomethyl [C16]	1	176	P01023	P01023 [1337-1356]		0	2306.1	6	0.77868	0.749679	0.842767	2.87856e+06	2.46274e+06	3.60093e+06	2.27506e+06	4.71046e+06	1.19122e+06	19793.1	42229.8	36809.1	75608	248917	398484	2.07947e+06	3.11472e+06	406640	693724	466714	6.18316e+06	3.55773e+06	890580	3.34546e+06	5.43002e+06	2.21935e+06	661480	438781	1.02882e+06	596094	140375	653884	889544	147218	293122	577152	1.26504e+06	1.44705e+06
	High	[K].VDLSFSPSQSLPASHAHLR.[V]		1	21	P01023	P01023 [568-586]		0	2049.05	0	4.74369e-17	0.565116	0.336708	13795.9	6892.62	42637	5009.82	6087.36			8081.33	27499.1	25222	3437.42		3.20356e+06	1.59438e+06	6978.5									2348.57	1489.62	4270.5	3753.12					933.214		1.71134e+06	2.31105e+06
	High	[R].KYSDASDCHGEDSQAFCEK.[F]	2xCarbamidomethyl [C8; C17]	1	3	P01023	P01023 [271-289]		1	2233.88	0			3.66332e-17
	High	[K].ETTFNSLLCPSGGEVSEELSLK.[L]	1xCarbamidomethyl [C9]	1	210	P01023	P01023 [913-934]		0	2397.15	3	0.944833	0.785982	0.9744	1.57909e+06	434083	3.04043e+06	1.56766e+06	2.91547e+06	839728	94523	73231.7	536628	672934	42641.4	226048	649695	2.47386e+06	1.5501e+06	230345	246759	2.058e+06	2.50537e+06	469886	1.31896e+06	336066	421200	675546	304919	899636	765765	235361	515455	250448	181703	370393	1.27623e+06	3.12178e+06	2.3566e+06
	High	[R].TEVSSNHVLIYLDK.[V]		1	163	P01023	P01023 [1408-1421]		0	1617.85	5	0.978294	0.460157	0.853855	1.36043e+07	1.52156e+07	2.00116e+07	9.74259e+06	3.49637e+07	969285	1.59246e+06	1.31533e+06	2.53237e+06	2.50419e+06	1.14493e+06	343357	3.72613e+07	4.05937e+07	3.02824e+07	703150	879387	715225	2.45635e+06	1.90885e+06	3.81177e+06	1.5743e+06	4.99353e+06	1.30879e+07	5.34951e+06	7.42685e+06	5.04331e+06	2.68329e+06	2.16053e+06	5.21777e+06	3.20407e+06	7.98216e+06	4.74615e+06	7.88561e+07	4.21953e+07
	High	[R].LVHVEEPHTETVR.[K]		1	58	P01023	P01023 [720-732]		0	1545.8	5	0.663101	0.977198	0.661511		1.12357e+07			4.38581e+06		4.93939e+06	1.95999e+06	2.12269e+06	2.28227e+06	1.69734e+06	4.8923e+06	8.15813e+06	2.28061e+07	8.18804e+06	4.36912e+06	1.58211e+06		1.2729e+06		441592		169541	8.47381e+06	6.29819e+06	2.8677e+06	2.11986e+06	1.72965e+06	4.54801e+06	814305	1.56685e+06	1.87835e+06	5.03598e+06	2.16019e+07	1.08232e+06
	High	[R].LLIYAVLPTGDVIGDSAK.[Y]		1	286	P01023	P01023 [540-557]		0	1845.04	1	0.817077	0.925399	0.845118	7.59678e+06	4.51256e+06	4.6276e+06	2.36199e+06	1.44036e+06	860601	2.63875e+06	540641	1.35151e+06	1.0727e+06	1.01324e+06	1.05701e+06	2.30862e+06	4.17055e+06	2.64269e+06	418341	1.66968e+06	5.69063e+06	3.0091e+06	2.01433e+06	3.58202e+06	5856.08	3.37521e+06	4.05902e+06	2.09565e+06	3.15312e+06	881125	687970	1.33827e+06	1.06693e+06	878885	760504	1.84895e+06	5.26901e+06	2.00684e+06
	High	[K].PQYMVLVPSLLHTETTEK.[G]		1	16	P01023	P01023 [29-46]		0	2086.09	0	0.0213362	0.000860375	0.959764	248532		565416	622716		1.32496e+06							37847.6												10972.4		157548							206974	57852
	High	[K].SSSNEEVMFLTVQVK.[G]	1xOxidation [M8]	1	313	P01023	P01023 [94-108]		0	1713.84	5	0.715308	0.709995	0.757949	1.67614e+06	1.43759e+06	3.24042e+06	2.25597e+06	3.40862e+06	1.52572e+06	1.37484e+06	1.33667e+06	1.24766e+06	1.07072e+06	510877	606171	6.02286e+06	1.93281e+07	8.1925e+06	237335	756090	533657	313894	1.01645e+06	2.35605e+06	494321	587894	2.5342e+06	2.85357e+06	3.89987e+06	2.32718e+06	583374	3.60065e+06	2.62494e+06	2.70857e+06	2.0457e+06	6.3146e+06	1.40652e+07	1.84222e+07
	High	[K].FSGQLNSHGCFYQQVK.[T]	1xCarbamidomethyl [C10]	1	35	P01023	P01023 [290-305]		0	1899.88	1	0.934781	0.453959	0.501676	2.75772e+06	1.4946e+06	2.13984e+06	1.69523e+06	1.08421e+07	1.87273e+06	1.57311e+06	733223	544395	31733.9	629327	5.23546e+06	1.72382e+07	4.25093e+07	1.63658e+07	266259	673929	184569	2.59015e+06	5.19399e+06	1.58445e+06	903089	439992	7.8747e+06	2.95787e+06	8.64058e+06	4.64435e+06	2.76207e+06	2.46755e+06	4.9447e+06	2.06762e+06	7.77597e+06	3.9782e+06	1.71197e+08	2.5011e+07
	High	[K].ALLAYAFALAGNQDK.[R]		1	249	P01023	P01023 [1148-1162]		0	1565.83	8	0.589441	0.938289	0.999217	6.386e+06	5.63939e+06	7.08907e+06	3.60596e+06	1.8192e+06	595447	835714	170247	629897	662047	1.29724e+06	743900	3.09643e+06	1.01522e+07	3.42337e+06	953982	1.94275e+06	5.63186e+06	4.08663e+06	77077.5	3.21004e+06	2.41104e+06	3.71875e+06	4.34273e+06	1.68175e+06	4.52264e+06	1.08268e+06		1.13684e+06	1.36479e+06	1.57576e+06	1.50378e+06	1.29617e+06	7.43397e+06	8.07055e+06
	High	[K].AAQVTIQSSGTFSSK.[F]		1	652	P01023	P01023 [1275-1289]		0	1511.77	31	0.694017	0.489585	0.755039	5.7532e+07	3.03552e+07	5.53825e+07	3.59895e+07	3.67909e+07	2.71649e+07	9.42087e+06	4.78207e+06	7.51584e+06	5.54063e+06	1.03134e+07	1.14514e+07	3.94894e+07	6.89073e+07	5.09129e+07	6.12096e+06	1.2621e+07	1.64325e+07	9.71624e+06	7.60601e+06	2.78323e+07	2.05206e+07	9.92239e+06	2.36913e+07	1.44857e+07	2.06459e+07	7.32202e+06	6.37784e+06	1.31097e+07	1.0797e+07	1.27734e+07	1.41318e+07	2.03647e+07	7.47165e+07	4.14162e+07
	High	[R].IAQWQSFQLEGGLK.[Q]		1	384	P01023	P01023 [175-188]		0	1604.84	7	0.721065	0.890724	0.893724	8.87089e+06	9.99534e+06	7.86004e+06	7.81944e+06	1.12848e+07	4.82726e+06	963119	646437	3.31525e+06	2.09706e+06	1.75463e+06	1.43739e+06	7.39479e+06	1.18431e+07	1.84215e+07	640120	1.75835e+06	1.56953e+06	993276	3.22151e+06	3.33162e+06	1.70027e+06	5.18421e+06	1.04616e+07	3.20811e+06	1.45547e+07	290245	1.57444e+06	6.07683e+06	4.01725e+06	3.51676e+06	2.84311e+06	9.49701e+06	3.76218e+07	7.86454e+06
	High	[K].VTGEGCVYLQTSLK.[Y]	1xCarbamidomethyl [C6]	1	729	P01023	P01023 [1316-1329]		0	1554.78	15	0.0392943	0.0639688	0.964454	1.79402e+07	1.41262e+07	3.3843e+07	2.19955e+07	3.18087e+07	1.52535e+07	1.12415e+06	1.31569e+06	1.60399e+06	1.139e+06	1.15702e+06	2.32882e+06	2.03404e+07	5.82814e+07	1.90799e+07	994447	2.13117e+06	2.17956e+06	2.57001e+06	5.33295e+06	1.17609e+07	3.23327e+06	1.29872e+06	1.31524e+07	4.18741e+06	9.40272e+06	1.8398e+06	579689	4.07119e+06	4.01955e+06	3.51112e+06	3.42368e+06	3.93829e+06	6.1013e+07	2.36633e+07
	High	[R].VTAAPQSVCALR.[A]	1xCarbamidomethyl [C9]	1	496	P01023	P01023 [587-598]		0	1272.67	10	0.978932	0.691345	0.979379	1.787e+08	1.34568e+08	2.61705e+08	2.25984e+08	1.92566e+08	9.78501e+07	4.25812e+07	2.8944e+07	2.97294e+07	3.25935e+07	3.80943e+07	2.91599e+07	1.81125e+08	3.34039e+08	2.51659e+08	2.06466e+07	6.19314e+07	8.20726e+07	5.38979e+07	1.00489e+08	1.72175e+08	5.00532e+07	8.78181e+07	1.14184e+08	8.2421e+07	1.62061e+08	3.29016e+07	1.42983e+07	7.54004e+07	4.59358e+07	5.05938e+07	7.10947e+07	1.35892e+08	3.48641e+08	3.30443e+08
	High	[K].MCPQLQQYEMHGPEGLR.[V]	1xCarbamidomethyl [C2]; 1xOxidation [M]	1	90	P01023	P01023 [688-704]		0	2089.93	0	0.00169155	0.0351431	0.0623359	4.20504e+06	4.45291e+06	6.66516e+06	6.30892e+06	4.3617e+06	2.82614e+06	229706	652954	171202	194754		125139	6.51033e+06	9.25588e+06	7.38417e+06	88086	459219	142517	218526	42826.5	484197	136590	55675	223957	2.06891e+06	954072	684946	423410	376848	578474	319740	1.30412e+06	933735	3.0487e+07	5.87156e+06
	High	[R].LLLQQVSLPELPGEYSMK.[V]	1xOxidation [M17]	1	221	P01023	P01023 [1298-1315]		0	2061.09	9	0.96928	0.494879	0.53609	4.59372e+06	3.83521e+06	7.94129e+06	6.24368e+06	8.58274e+06	4.52298e+06	372572	309934	406237	460849	1.76974e+06	6.41139e+06	5.64277e+06	1.11282e+07	2.89049e+06	3.25673e+06	8.07686e+06	4.72304e+06	5.24947e+06	2.12634e+06	3.16893e+06	678804	1.23969e+06	6.27716e+06	1.10793e+06	7.41417e+06	1.41782e+06	579990	2.01151e+06	4.46966e+06	660280	985494	2.91043e+06	2.22953e+06	3.15093e+06
	High	[K].GHFSISIPVK.[S]		1	71	P01023	P01023 [522-531]		0	1084.61	2	0.939939	0.851147	0.747596	518834	435856	377384	464074	1.39025e+06	854876	1.00285e+06	116385	31980.4	41299.5	98421.4	131869	9.44964e+06	4.93449e+07	819091	53715.6	242736	60923	418033	238390	593746	576439	160642	357916	292325	916811	2.03517e+06	164954	243820	263126	305703	1.13234e+06	269520	4.10871e+07	1.00673e+07
	High	[K].NEDSLVFVQTDK.[S]		1	268	P01023	P01023 [124-135]		0	1394.68	11	0.80849	0.788226	0.810184	2.84944e+07	3.06145e+07	5.10238e+07	4.32433e+07	4.16317e+07	2.01985e+07	3.71401e+06	6.15557e+06	7.41021e+06	9.61664e+06	1.03714e+07	7.87643e+06	7.18106e+07	8.29914e+07	7.24401e+07	6.12829e+06	1.42274e+07	1.38009e+07	9.46362e+06	7.90984e+06	2.79222e+07	7.73071e+06	7.32814e+06	7.82326e+07	1.34404e+07	4.81365e+07	3.90282e+06	3.96119e+06	1.05365e+07	1.20197e+07	1.52105e+07	1.40133e+07	2.90276e+07	1.58694e+08	6.24367e+07
	High	[K].PLLVEPEGLEK.[E]		1	410	P01023	P01023 [902-912]		0	1223.69	21	0.977612	0.985164	0.788025	4.04238e+07	5.13746e+07	1.177e+08	8.02178e+07	2.25512e+08	4.6599e+07	1.00636e+07	1.37435e+07	1.62226e+07	8.47793e+06	1.51437e+07	1.82536e+07	1.42547e+08	5.27018e+08	9.46364e+07	2.72301e+07	2.68876e+07	1.5323e+07	3.37065e+07	5.89731e+07	4.17861e+07	3.57262e+07	3.72898e+07	1.44087e+08	6.97558e+07	1.58798e+08	2.30305e+07	1.35149e+07	5.96417e+07	2.26945e+07	2.06961e+07	5.05548e+07	1.00001e+08	6.04645e+08	1.95148e+08
	High	[K].PVPGHVTVSICR.[K]	1xCarbamidomethyl [C11]	1	121	P01023	P01023 [259-270]		0	1321.7	11	0.723406	0.759294	0.549182	1.5135e+07	1.98519e+07	1.89439e+07	1.95846e+07	1.19926e+08	1.34805e+07	2.6518e+07	2.10257e+07	1.50917e+07	9.90781e+06	1.37275e+07	3.72811e+06	7.59323e+07	1.43182e+08	1.01895e+08	3.52121e+06	2.16068e+07	5.80717e+06	3.14446e+06	3.84841e+06	1.63936e+07	2.11846e+07	5.38831e+06	4.97715e+07	2.61114e+07	6.10016e+07	2.28204e+07	1.74002e+07	2.56141e+07	2.16815e+07	2.42255e+07	2.30906e+07	5.08341e+07	2.81581e+09	1.31422e+08
	High	[K].AIGYLNTGYQR.[Q]		1	416	P01023	P01023 [1004-1014]		0	1255.64	5	0.788717	0.975338	0.943588	9.93796e+07	5.60157e+07	1.02919e+08	1.10944e+08	1.24447e+08	3.4642e+07	1.86467e+07	1.97641e+07	1.90889e+07	1.80247e+07	2.31368e+07	2.30632e+07	1.11191e+08	2.21315e+08	1.35975e+08	1.27095e+07	3.36874e+07	4.19505e+07	4.0441e+07	3.60159e+07	9.90151e+07	3.49032e+07	4.98058e+07	1.12348e+08	4.73873e+07	7.04012e+07	1.97085e+07	1.26934e+07	3.96514e+07	3.16481e+07	3.21075e+07	3.32109e+07	8.14683e+07	2.97597e+08	1.43864e+08
	High	[K].SLNEEAVKK.[D]		1	278	P01023	P01023 [1169-1177]		1	1017.56	8	0.925978	0.937199	0.956693	3.01449e+07	3.88435e+07	6.88647e+07	2.777e+07	6.13604e+06	2.53777e+07	3.16212e+07	1.67272e+07	2.00723e+07	1.69663e+07	2.6293e+07	1.29572e+07	5.12781e+07		9.44051e+06	1.34401e+07	1.87331e+07	2.89736e+07	2.52329e+07	2.72614e+07	4.3324e+07	3.04778e+07	2.13645e+07	5.10424e+07	7.51472e+06	3.91041e+07	1.94276e+07	1.25441e+07	3.40716e+07	2.03142e+07	2.23257e+07	4.59504e+07	5.91172e+07	3.40599e+08	1.55636e+07
	High	[K].LPPNVVEESAR.[A]		1	576	P01023	P01023 [935-945]		0	1210.64	17	0.613056	0.901247	0.489677	1.15723e+08	2.37401e+08	2.51717e+08	1.37279e+08	1.81741e+08	5.35324e+07	5.53904e+07	5.7154e+07	2.46356e+07	3.07436e+07	3.71304e+07	3.64211e+07	2.0254e+08	5.21342e+08	4.4361e+08	4.67039e+07	6.43639e+07	6.56918e+07	7.43468e+07	1.01121e+08	1.3623e+08	7.71639e+07	6.22114e+07	1.17402e+08	9.96824e+07	2.34369e+08	3.94786e+07	3.23428e+07	6.50604e+07	5.95774e+07	6.73197e+07	1.49298e+08	1.03426e+08	6.87811e+08	4.54032e+08
	High	[K].FQVDNNNRLLLQQVSLPELPGEYSMK.[V]	1xOxidation [M25]	1	5	P01023	P01023 [1290-1315]		1	3048.55	0
	High	[K].GPTQEFKK.[R]		1	179	P01023	P01023 [109-116]		1	934.499	4	0.966072	0.590249	0.956526	9.62585e+07	1.09439e+08	1.52411e+08	4.49837e+07	4.92007e+07	1.82786e+08	5.83717e+08	8.12225e+07	3.07072e+08	1.87662e+07	1.26054e+08	1.64257e+07	3.89571e+07	5.98987e+06		9.76188e+07	6.41071e+07	1.98888e+08	1.45319e+07	4.69242e+08	1.86189e+08	2.20636e+08	5.74807e+08	1.23052e+08	6.87222e+07	2.74561e+07	3.74196e+07	1.59273e+08	6.45585e+07	6.23936e+07	5.23325e+07	6.67253e+07	7.11411e+07	7.4877e+07	2.58802e+06
	High	[K].SIYKPGQTVK.[F]		1	152	P01023	P01023 [136-145]		0	1120.64	13	0.758123	0.919191	0.741694	6.38233e+07	3.94792e+07	7.59734e+07	3.5036e+07	1.25518e+08	2.58819e+07	8.70845e+06	9.9524e+06	2.60709e+07	1.63917e+07	3.39025e+07	1.71236e+07	7.82263e+07	1.69401e+08	9.88762e+07	1.29254e+07	2.54885e+07	2.11695e+07	1.4815e+07	6.73028e+06	2.61402e+07	1.83463e+07	1.20259e+07	9.12666e+07	5.07713e+07	6.42837e+07	2.81702e+07	8.58117e+06	4.37796e+07	2.5759e+07	3.44272e+07	4.06777e+07	6.70016e+07	1.55696e+08	1.32264e+08
	High	[R].NQGNTWLTAFVLK.[T]		2	63	P01023; P20742	P01023 [1035-1047]; P20742 [1041-1053]		0	1491.8	4	0.425853	0.887018	0.682804	54190	126430	60453.4	44366.3	136063		147570	30471			27756.5	11644.7	98786.4	95967	4020.15	2343.24	42016.5	2776.37	19301.4	22981	1453.85	1284.38		69963.9	27000.2		14740.4	36716.7		30255.8		116439	344226		147651
	High	[K].GPTQEFK.[K]		1	337	P01023	P01023 [109-115]		0	806.404	17	0.0350569	0.0819036	0.837298	3.39365e+07	3.14008e+07	6.70891e+07	3.03231e+07	4.61395e+07	1.09536e+08	9.63682e+07	5.06589e+07	8.17607e+07	4.95821e+07	9.39019e+07	4.72651e+07	2.13024e+08	3.90346e+08	2.22156e+08	7.76253e+07	1.2676e+08	1.83054e+08	8.92919e+07	1.36772e+08	1.84363e+08	9.68677e+07	7.29896e+07	2.90075e+08	1.75917e+08	1.2112e+08	1.37407e+08	9.67116e+07	1.75314e+08	1.18549e+08	1.32e+08	8.67237e+07	2.14715e+08	7.8473e+08	2.40125e+07
	High	[R].SASNMAIVDVK.[M]	1xOxidation [M5]	1	537	P01023	P01023 [1374-1384]		0	1150.58	23	0.866709	0.821275	0.974081	1.07998e+08	1.20735e+08	1.27093e+08	1.02679e+08	1.96335e+08	7.23914e+07	3.81585e+07	2.81605e+07	3.763e+07	4.44013e+07	4.85301e+07	5.58609e+07	1.04126e+08	2.38825e+08	1.40208e+08	2.89504e+07	6.38861e+07	7.9063e+07	7.65296e+07	7.34844e+07	1.05745e+08	7.44563e+07	6.41286e+07	8.92351e+07	5.51595e+07	1.25836e+08	4.73824e+07	3.89269e+07	4.81534e+07	5.66799e+07	4.70156e+07	5.08489e+07	9.95921e+07	2.11689e+08	2.27547e+08
	High	[K].MVSGFIPLKPTVK.[M]		2	9	P01023; P20742	P01023 [1385-1397]; P20742 [1391-1403]		0	1416.83	0	4.74369e-17	0.791883	0.974081	47107.9	93123.5	130420	266285	226818	546465					66015.6													63737		56144.2
	High	[R].SSGSLLNNAIK.[G]		2	221	P01023; P20742	P01023 [1082-1092]; P20742 [1088-1098]		0	1103.61	7	0.808403	0.653771	0.474188	8.94144e+07	8.37555e+07	1.41834e+08	1.34859e+08	1.38032e+08	4.11356e+07	4.01353e+07	3.08299e+07	4.09943e+07	2.73989e+07	4.40638e+07	2.85195e+07	1.72399e+08	3.1415e+08	2.22765e+08	2.11059e+07	5.40082e+07	7.60515e+07	4.49088e+07	9.17359e+06	7.11016e+07	3.70573e+07	2.99793e+07	1.1713e+08	7.21409e+07	1.66275e+08	2.92035e+07	1.64645e+07	6.715e+07	6.37883e+07	3.15581e+07	5.6441e+07	1.23661e+08	3.0216e+08	2.53264e+08
	High	[K].VYDYYETDEFAIAEYNAPCSK.[D]	1xCarbamidomethyl [C19]	1	66	P01023	P01023 [1449-1469]		0	2548.09	1	0.192913	0.0372934	0.0358598	517149	503021	1.56902e+06	881793	748842	212095			32506.1	33562.5	35527.8	33417.2	501594	904600	420829	24279.6	70987.9	80979	76680.2	84605.7	123470	48758.1	24772.8	169486	38000.9	335184	120786	20079.9	83720.4	73068	76341.8	36685.7	83375.5	1.71834e+06	671590
	High	[R].VGFYESDVMGR.[G]		1	105	P01023	P01023 [705-715]		0	1259.57	3	0.215032	0.45476	0.0447647	1.13915e+07	1.76912e+07	2.61578e+07	4.72271e+07	5.44944e+07	1.03033e+07	3.07597e+06	2.42559e+06	901721	1.16375e+06	1.19798e+06	779135	2.7482e+07	8.096e+07	4.51857e+07	770540	2.38257e+06	7.43982e+06	1.61188e+06	227613	3.88234e+06	4.69345e+06	489153	1.61371e+07	7.10995e+06	1.78604e+07	4.75801e+06	1.1045e+06	4.55628e+06	2.85573e+06	2.98716e+06	7.12922e+06	1.18663e+07	4.74021e+07	6.10064e+07
	High	[K].YDVENCLANK.[V]	1xCarbamidomethyl [C6]	1	263	P01023	P01023 [558-567]		0	1225.55	8	0.786845	0.545615	0.999981	1.26015e+08	8.84767e+07	2.31626e+08	1.43884e+08	2.16651e+08	8.10635e+07	3.946e+07	2.65621e+07	3.24376e+07	2.6631e+07	3.9e+07	1.38896e+07	1.38133e+08	2.35759e+08	2.05856e+08	8.84787e+06	3.65193e+07	7.97381e+07	3.45847e+07	4.92381e+07	1.10012e+08	4.25486e+07	4.72938e+07	1.36359e+08	7.55609e+07	1.48163e+08	2.53351e+07	1.77659e+07	5.8387e+07	3.53606e+07	3.01163e+07	5.61582e+07	9.99835e+07	2.45203e+08	2.58955e+08
	High	[R].SASNMAIVDVK.[M]		1	84	P01023	P01023 [1374-1384]		0	1134.58	4	0.716337	0.841993	0.460849	2.1028e+07	2.16449e+07	4.82802e+07	4.12975e+07	8.69452e+07	2.03236e+07	1.10471e+07	9.40969e+06	3.47886e+06	3.89635e+06	9.59294e+06	8.06521e+06	5.66695e+07	1.26458e+08	7.70372e+07	3.1584e+06	7.45663e+06	1.02539e+07	7.38226e+06	8.82541e+06	3.90791e+07	1.97625e+07	1.05455e+07	5.553e+07	1.48202e+07	3.80502e+07	4.92477e+06	2.93461e+06	1.37843e+07	1.18362e+07	1.35153e+07	2.29608e+07	3.87059e+07	3.69124e+06	1.19297e+08
	High	[K].PVPGHVTVSICRK.[Y]	1xCarbamidomethyl [C11]	1	50	P01023	P01023 [259-271]		1	1449.8	5	0.765392	0.863083	0.915953	5.7005e+06	4.07439e+06	5.79831e+06	4.97636e+06	2.25509e+07	6.08447e+06	4.03856e+06	4.20445e+06	3.01086e+06	2.35317e+06	2.53136e+06	1.09676e+06	2.52911e+07	5.07855e+07	1.86386e+07	1.4523e+06	4.10758e+06	2.78203e+06	1.41583e+06	1.29414e+06	1.93474e+06	4.749e+06	1.04068e+06	6.2918e+06	8.12998e+06	1.18432e+07	6.46821e+06	4.87946e+06	1.9009e+06	2.90977e+06	3.9485e+06	3.8525e+06	6.85102e+06	4.6059e+07	4.34672e+07
	High	[R].NALFCLESAWK.[T]	1xCarbamidomethyl [C5]	1	28	P01023	P01023 [1123-1133]		0	1338.65	0	0.0939576	0.262472	0.0785781	1.1319e+06	46042.7	1.36564e+06	456760	900803	57399.8			198774	323419		1008.84	176967	46773.1	585220	4585.12	17138	94113.1	11849.8		31769.8			206097	69998.6	174522			9669.72	109116	70861.7	55925.7	161675		355485
	High	[K].FEVQVTVPK.[I]		1	136	P01023	P01023 [229-237]		0	1046.59	3	0.725482	0.785704	0.731761	5.70256e+07	8.09649e+07	1.4425e+08	1.08788e+08	1.73543e+08	5.64222e+07	3.10308e+07	2.37742e+07	3.40542e+07	1.67144e+07	1.43401e+07	3.6368e+07	1.16511e+08	2.25687e+08	1.30442e+08	1.34405e+07	9.1106e+06	1.54721e+07	3.05828e+07	2.26375e+07	4.55251e+07	3.41762e+07	2.29702e+07	1.21311e+08	5.12185e+07	7.59744e+07	3.54671e+07	8.72206e+06	4.31375e+07	3.44201e+07	3.24296e+07	3.82787e+07	1.00181e+08	1.97238e+08	2.17396e+08
	High	[K].SDIAPVAR.[L]		1	514	P01023	P01023 [532-539]		0	828.457	18	0.889413	0.68589	0.926586	2.99863e+08	2.08607e+08	4.0454e+08	2.51429e+08	3.77364e+08	1.82203e+08	8.31021e+07	4.48033e+07	1.00863e+08	5.06112e+07	8.89569e+07	8.07501e+07	2.4308e+08	5.11735e+08	3.30238e+08	4.36902e+07	6.4863e+07	2.03508e+08	1.20585e+08	1.24981e+08	1.75754e+08	7.65707e+07	1.19161e+08	2.44656e+08	1.20838e+08	2.26449e+08	1.01126e+08	3.46148e+07	1.60153e+08	1.02968e+08	1.08281e+08	9.6785e+07	2.64101e+08	9.71224e+07	4.75848e+08
	High	[R].QTVSWAVTPK.[S]		1	63	P01023	P01023 [854-863]		0	1116.6	6	0.717408	0.0581363	0.435106	3.71995e+07	3.37595e+07	6.26827e+07	6.53364e+07	1.37853e+08	4.10056e+07	1.34707e+07	4.5337e+06	4.31411e+06	4.66042e+06	3.88432e+06	1.05412e+07	1.39692e+08	2.78794e+08	1.35506e+08	3.81655e+06	1.41939e+07	1.28834e+07	1.38156e+07	2.1783e+07	6.57909e+07	1.62447e+07	3.58086e+07	6.01875e+07	2.21508e+07	1.93711e+07	2.2391e+06	2.6352e+06	5.86042e+06	6.01713e+06	1.52954e+07	2.11399e+07	2.4826e+07	2.47436e+08	1.68612e+08
	High	[R].VGFYESDVMGR.[G]	1xOxidation [M9]	1	405	P01023	P01023 [705-715]		0	1275.57	13	0.798954	0.989539	0.973891	6.70108e+07	5.44415e+07	1.01383e+08	7.22274e+07	9.60109e+07	3.63468e+07	3.0236e+07	2.1176e+07	2.91121e+07	2.35914e+07	3.26603e+07	2.59958e+07	6.91866e+07	1.52622e+08	1.17674e+08	1.54314e+07	3.8779e+07	6.44624e+07	4.61654e+07	3.91212e+07	9.39356e+07	3.13416e+07	3.58818e+07	8.12648e+07	4.52129e+07	9.14325e+07	2.4017e+07	1.29938e+07	3.6333e+07	3.63744e+07	3.17519e+07	3.22157e+07	9.29903e+07	2.77687e+06	1.46934e+08
	High	[R].AVDQSVLLMK.[P]	1xOxidation [M9]	1	110	P01023	P01023 [599-608]		0	1119.61	8	0.38262	0.96535	0.00015154	2.03582e+07	1.54741e+07	3.12588e+07	2.74015e+07	2.83147e+07	1.8023e+07	1.14859e+07	6.41039e+06	9.7177e+06	8.0527e+06	1.23512e+07	1.0985e+07	5.90582e+07	5.71928e+07	3.47409e+07	6.62773e+06	1.75532e+07	2.35221e+07	1.7113e+07	2.61819e+07	3.75907e+07	1.78985e+07	2.31019e+07	2.84052e+07	1.12549e+07	2.91768e+07	1.03528e+07	4.43805e+06	1.36812e+07	1.47728e+07	1.22185e+07	9.81056e+06	3.48275e+07	1.70001e+09	3.97994e+07
	High	[R].QGIPFFGQVR.[L]		1	182	P01023	P01023 [361-370]		0	1148.62	7	0.853379	0.731614	0.805007	1.17791e+07	1.25414e+07	3.54911e+07	1.19282e+07	1.42817e+07	4.44811e+06	3.35482e+06	2.28498e+06	4.71303e+06	3.11037e+06	1.49749e+06	866692	4.91143e+06	1.98433e+07	1.60552e+07	2.55875e+06	4.07137e+06	5.01192e+06	4.60871e+06	9.36098e+06	8.96169e+06	6.01438e+06	1.6386e+07	4.40983e+06	6.91443e+06	6.50195e+06	1.18839e+06	1.21407e+06	6.07694e+06	2.13082e+06	1.35292e+06	6.43263e+06	4.92218e+06	6.95861e+07	1.03822e+07
	High	[K].FQVDNNNR.[L]		1	524	P01023	P01023 [1290-1297]		0	1006.47	22	0.211332	0.405387	0.225657	3.15235e+07	2.46635e+07	5.08865e+07	1.55611e+07	1.35339e+07	4.42384e+07	1.09517e+08	4.77848e+07	7.97853e+07	4.59602e+07	1.07722e+08	5.7707e+07	1.66616e+08	3.01022e+07	1.66355e+07	4.62084e+07	8.39127e+07	1.47972e+08	8.01685e+07	1.3591e+08	1.9406e+08	8.5579e+07	1.01149e+08	2.23102e+08	1.09521e+08	2.93904e+07	7.98797e+07	4.61023e+07	1.14271e+08	8.21869e+07	8.4502e+07	1.10817e+08	2.38366e+08	3.21093e+08	2.02341e+07
	High	[K].DMYSFLEDMGLK.[A]	1xOxidation [M]	1	19	P01023	P01023 [665-676]		0	1464.64	0	4.74369e-17	0.696679	0.378487	648741	477660	1.17209e+06	1.09869e+06	1.48865e+06	90278.9																					432885
	High	[R].AVDQSVLLMK.[P]		1	37	P01023	P01023 [599-608]		0	1103.61	1	0.343244	0.191478	0.850476	1.34327e+07	1.39477e+07	2.01634e+07	1.88454e+07	3.53796e+07	8.8399e+06	3.8125e+06	2.07487e+06	1.70127e+06	1.51655e+06	2.58731e+06	149304	1.19058e+07	4.06105e+07	2.09591e+07	491695	3.45704e+06	883075	2.02716e+06	4.08127e+06	5.11313e+06	2.79938e+06	475121	8.45513e+06	4.5959e+06	1.22518e+07	1.49744e+06	652877	3.26423e+06	1.34468e+06	2.95269e+06	4.20061e+06	6.25285e+06	9.88703e+07	3.00769e+07
	High	[K].GVPIPNK.[V]		1	49	P01023	P01023 [376-382]		0	724.435	1	0.872329	0.999895	5.96029e-05	4.12789e+07	2.99737e+07	4.24688e+07	4.67423e+07	4.62591e+07	1.85926e+07	1.3076e+07	7.17462e+06	9.23849e+06	7.7015e+06	1.24067e+07	9.40574e+06	3.96667e+07	5.6305e+07	4.82641e+07	6.69358e+06	1.03377e+07	3.07468e+07	1.71961e+07	1.77748e+07	2.98792e+07	1.35605e+07	1.89748e+07	4.72815e+07	2.12447e+07	3.75813e+07	1.10239e+07	6.2976e+06	1.90146e+07	1.31011e+07	1.49789e+07		673635
	High	[K].DNSVHWERPQKPK.[A]		1	11	P01023	P01023 [1178-1190]		0	1620.82	1	4.74369e-17	4.58126e-17	3.66332e-17													768094	1.18802e+07													1.18414e+06
	High	[K].VDSHFR.[Q]		2	193	P01023; P20742	P01023 [355-360]; P20742 [351-356]		0	760.374	4	0.824039	0.236202	0.500059	938421	555688	9.79273e+06	981431	1.04359e+06	6.17145e+06	7.15373e+06	2.21636e+06	5.05765e+06		8.08168e+06		7.90139e+06	6.409e+06	4.07617e+06	6.22417e+06	7.44681e+06	1.34767e+06	4.6245e+06	4.14314e+06	2.73965e+06	1.26246e+06	4.97723e+06		959847							2.80429e+06	517365	1.14431e+07
	High	[K].KDNSVHWERPQK.[P]		1	6	P01023	P01023 [1177-1188]		1	1523.77	2	0.838432	0.975154	0.982247						1.27967e+06	5.8647e+06	3.69428e+06	2.77421e+06	1.17226e+06	1.0707e+06					1.18072e+06	1.81732e+06	706872		1.15766e+06	1.86705e+06		357780	965705	1.61606e+06		2.62042e+06	470277	1.38294e+06	2.17647e+06	1.91274e+06	1.7051e+06	3.2681e+06
	High	[K].SLNEEAVK.[K]		1	283	P01023	P01023 [1169-1176]		0	889.463	7	0.757741	0.93336	0.962346	1.83757e+07	9.64139e+06	7.4732e+06	1.14478e+07	1.9843e+07	2.96435e+06	4.74425e+06	3.05399e+06	2.89351e+06	2.56083e+06	2.82851e+06	5.48926e+06	8.33889e+06	2.19767e+07	2.17093e+07	3.52414e+06	5.61424e+06	8.17855e+06	3.554e+06	3.09516e+06	9.58657e+06	9.09492e+06	2.52651e+06	5.06774e+06	4.30517e+06	9.01524e+06	1.89494e+07	4.17552e+06	6.03778e+06	8.05298e+06	3.88919e+06	4.11182e+06	4.31175e+06	1.12032e+07	8.43476e+06
	High	[K].RTTVMVK.[N]		1	149	P01023	P01023 [117-123]		1	834.487	8	0.744769	0.284021	0.47352	3.19421e+07	3.71913e+07	7.90889e+07	3.15022e+07	4.0384e+08	3.37921e+07	7.38757e+07	3.27111e+07	3.98268e+07	3.31487e+07	1.07479e+08	3.14421e+07	1.44755e+08	5.92847e+07	4.28846e+07	3.50257e+07	4.66664e+07	8.7535e+07	5.09647e+07	1.40389e+07	5.78349e+07	4.52037e+07	1.21795e+07	1.98818e+08	1.31899e+08	1.2326e+08	3.20222e+07	1.83334e+07	8.50698e+07	4.45457e+07	6.59313e+07	1.26317e+08	1.73866e+08	1.57699e+08	6.58697e+07
	High	[K].RTTVMVK.[N]	1xOxidation [M5]	1	210	P01023	P01023 [117-123]		1	850.481	13	0.880793	0.269445	0.997965	2.77621e+07	3.18869e+07	8.88089e+07	2.74849e+07	5.04154e+07	5.08019e+07	3.05214e+07	1.02854e+07	1.73832e+07	5.14132e+06	1.01806e+07	5.64213e+06	2.36426e+07	8.17202e+06	1.35603e+07	9.72799e+06	1.20472e+07	5.42814e+07	8.7889e+06	9.94105e+07	9.77625e+07	5.73629e+07	6.02991e+07	3.82067e+07	1.04291e+07	1.34712e+07	6.30887e+06	7.1339e+06	1.06393e+07	1.43418e+07	9.30794e+06	1.92587e+07	2.06424e+07	2.35783e+08	8.26013e+06
	High	[VK].YNILPEK.[DES]		2	172	P01023; P20742	P01023 [619-625]; [1330-1336]; P20742 [1336-1342]		0	876.483	2	0.984151	0.781836	0.781952	9.2524e+07	1.00759e+08	1.42048e+08	1.21566e+08	1.83857e+08	8.03485e+07	4.04166e+07	4.54326e+07	4.01724e+07	2.82928e+07	6.38914e+07	1.82259e+07	1.98071e+08	3.0048e+08	2.30632e+08	1.97938e+07	4.4453e+07	5.1409e+07	6.92416e+07	6.55049e+07	1.72662e+08	3.6185e+07	6.18954e+07	1.19436e+08	6.789e+07	1.55254e+08	2.4821e+07	1.29963e+07	6.91151e+07	4.44162e+07	2.93045e+07	5.44555e+07	1.10879e+08	2.83615e+08	2.63892e+08
	High	[K].SGGRTEHPFTVEEFVLPK.[F]		1	5	P01023	P01023 [211-228]		1	2030.03	0	4.74369e-17	0.602363	0.987174	25165.6	50840.9	18448.8	3468.57		65539		2620.14			14438.2														115589	110132	12603.3	56844			66661	1241.89			149041
	High	[K].MCPQLQQYEMHGPEGLR.[V]	1xCarbamidomethyl [C2]	1	4	P01023	P01023 [688-704]		0	2073.93	1	0.963762	0.00518566	0.987881	417052	623822	1.25841e+06	1.20954e+06	1.00593e+07								316163	3.24308e+06													119704
	High	[K].WITK.[Q]		1	84	P01023	P01023 [1237-1240]		0	547.324	5	0.881852	0.907422	0.898236	1.129e+07	1.27439e+07	2.13659e+07	6.77712e+06	1.04168e+07	8.10821e+06	6.744e+06	3.00377e+06	4.63965e+06	3.32055e+06	3.55697e+06	4.34489e+06	3.84773e+06	1.17666e+07	8.79366e+06	2.24816e+06	2.06225e+06	4.58617e+06	3.98605e+06	4.35132e+06	4.84823e+06	4.98405e+06	1.70263e+06	1.80212e+07	2.75819e+06	8.0768e+06	2.62123e+06	5.06625e+06	5.30598e+06	5.59939e+06	4.72908e+06	2.85442e+06	6.15569e+06	1.95585e+07	1.49759e+07
	High	[K].VVVQK.[K]		1	3	P01023	P01023 [205-209]		0	572.377	0	4.74369e-17	4.58126e-17	0.784299			72035.5	28134.8	127428				65770.5	88952.7																							71944.9		104482
	High	[R].GEAFTLK.[A]		1	50	P01023	P01023 [805-811]		0	765.414	3	0.437592	0.911489	0.668031	7.38758e+07	6.42885e+07	9.44717e+07	6.31359e+07	1.07521e+08	2.2286e+07	2.44796e+07	1.60917e+07	1.79472e+07	1.36637e+07	2.85524e+07	2.91252e+07	6.58561e+07	7.94626e+07	9.25098e+07	1.56435e+07	2.97957e+07	5.99614e+07	4.403e+07	2.13068e+07	1.08544e+08	4.62758e+07	1.29568e+07	7.91424e+07	2.76792e+07	7.5666e+07	1.44015e+07	1.25993e+07	3.64252e+07	3.86541e+07	2.96661e+07	2.50655e+07	6.70431e+07	2.32905e+07	1.2772e+08
	High	[R].TITK.[L]		1	12	P01023	P01023 [346-349]		0	462.292	0	0.852051	0.119545	0.87773	442173	453383	575449	404975	1.44765e+06				10918.1		54106	87282.3	483176	2.85204e+06	939913	106278	127739	254839		97012.6	1.36238e+06	227979	754747	87939.1	134331	313977		73915.9	89511.5	234215	88796.7	76078.1	75501.5	9.07928e+06	520829
	High	[K].MLER.[S]	1xOxidation [M1]	1	3	P01023	P01023 [1398-1401]		0	564.281	0	4.74369e-17		3.66332e-17																	6081.49
	High	[KR].YGAATFTR.[T]		2	508	P01023; P20742	P01023 [1264-1271]; P20742 [1270-1277]		0	886.442	16	0.997795	0.913263	0.921879	1.26358e+08	1.06222e+08	2.14707e+08	1.93581e+08	2.90633e+08	8.72159e+07	7.9625e+07	5.43795e+07	5.20031e+07	4.80904e+07	6.31633e+07	4.19252e+07	2.85226e+08	8.94553e+08	4.32695e+08	2.68638e+07	7.54001e+07	8.86733e+07	6.22206e+07	6.93782e+07	1.24646e+08	6.09395e+07	5.38879e+07	2.24365e+08	1.05607e+08	2.71907e+08	8.85781e+07	7.01687e+07	9.33699e+07	8.72213e+07	1.14262e+08	2.42557e+08	2.73819e+08	6.9475e+08	1.02897e+09
	High	[K].ATVLNYLPK.[C]		2	116	P01023; P20742	P01023 [812-820]; P20742 [818-826]		0	1018.59	2	0.253778	0.842953	6.50964e-05	1.08265e+06	3.12644e+06	7.46878e+06	2.62433e+06	3.53825e+06	2.60891e+06	626363	448087	605640	698413	599331	861415	354588	269508	2.89317e+06	2.44447e+06	419511	5.4484e+06	5.26019e+06	5.50743e+06	9.76174e+06	8.76493e+06	1.54328e+07	442645	716894	3.93037e+06	16513.3	493186	752315	560561	1.30699e+06	290305	94293.6		2.87044e+06
	High	[R].TTVMVK.[N]	1xOxidation [M4]	1	12	P01023	P01023 [118-123]		0	694.38	0	0.904135	0.379497	0.867243	3.26005e+06		9.91548e+06					605430				694624	2.23625e+06	9.65886e+06	5.47258e+06	1.44393e+06			3.11562e+06	759463				1.13257e+06	1.79816e+06	4.37945e+06	1.0841e+06	1.02518e+06			1.24158e+06	3.17802e+06	2.1082e+06		8.93806e+06
	High	[K].SIYK.[P]		1	5	P01023	P01023 [136-139]		0	510.292	1			3.66332e-17																																		6.62499e+06
	High	[K].LSFVK.[V]		1	32	P01023	P01023 [350-354]		0	593.366	4	0.991595	0.97945	0.488281	1.2809e+07	1.55144e+07	1.45003e+07	1.50816e+07	2.25454e+07	9.8023e+06	2.69617e+06	3.09408e+06	4.15057e+06	7.38876e+06	5.85928e+06	6.81528e+06	2.75752e+07	9.2163e+07	4.33103e+07	2.8501e+06	8.40883e+06	6.31523e+06	1.4174e+07	4.80226e+06	8.69118e+06	7.78344e+06	4.24113e+06	3.2308e+07	1.04106e+07	3.6398e+07	8.17744e+06	4.97885e+06	8.66625e+06	1.18383e+07	9.43084e+06	1.99617e+07	1.69399e+07	6.31618e+07	5.42418e+07
	High	[R].QSSEITR.[T]		1	46	P01023	P01023 [339-345]		0	820.416	1	4.74369e-17	4.58126e-17	0.100333	1.60976e+06		1.69844e+06																															1.19602e+08
	High	[K].PGQTVK.[F]		1	3	P01023	P01023 [140-145]		0	629.362	1	0.829064	0.687642	0.927448	1.39014e+07	5.16764e+06	3.99123e+06	3.16219e+06	6.54727e+06	4.38198e+06	3.27832e+06		1.636e+06	2.30957e+06	1.93786e+06	2.1155e+06	1.51211e+06	8.95679e+06	3.78428e+06	1.62428e+06		2.35716e+06	2.70962e+06	2.0984e+06			1.02193e+06	2.0486e+06	1.96361e+06	2.33188e+06	1.92992e+06	1.63251e+06	3.99165e+06	2.03058e+06	1.99386e+06		1.7433e+06	9.97224e+07	2.27607e+06
	High	[K].TFAQAR.[A]		1	7	P01023	P01023 [1048-1053]		0	693.368	0	0.544638	4.58126e-17	0.823963			2.83841e+06			1.49158e+06														1.17967e+06			564652												4.00938e+06
	High	[K].VFQLK.[R]		1	74	P01023	P01023 [308-312]		0	634.392	5	0.804383	0.672294	0.203446	5.60208e+06	5.4468e+06	6.53439e+06	5.57037e+06	1.33824e+07	2.09492e+06	2.11844e+06	1.89154e+06	2.02045e+06	1.98264e+06	4.07226e+06	3.39062e+06	2.73698e+07	2.98997e+07	3.26148e+07	2.31639e+06	5.83112e+06	6.342e+06	4.74671e+06	963605	7.80216e+06	4.30061e+06	2.42821e+06	1.64242e+07	8.41609e+06	1.56815e+07	5.16965e+06	2.18987e+06	7.703e+06	5.52091e+06	4.72365e+06	7.18882e+06	8.53167e+06	3.80847e+07	1.49557e+07
	High	[K].PAIVK.[V]		1	49	P01023	P01023 [1444-1448]		0	527.355	2	0.911256	0.899524	0.981651	7.14345e+06	5.62656e+06	9.96683e+06	7.8566e+06	1.90893e+07	1.04202e+07	3.51706e+06	3.49713e+06	2.68999e+06	2.44378e+06	5.51263e+06	4.63223e+06	9.39801e+06	2.49891e+07	1.22218e+07	2.33471e+06	4.32054e+06	6.61633e+06	4.76682e+06	5.62115e+06	6.62758e+06	8.92782e+06	6.15773e+06	5.73172e+06	6.26085e+06	1.26095e+07	2.02464e+06	2.73723e+06	3.75982e+06	3.14015e+06	4.90805e+06	5.85303e+06	4.97207e+06		1.6237e+07
	High	[R].DLKPAIVK.[V]		1	24	P01023	P01023 [1441-1448]		0	883.561	3	0.652895	0.443972	0.950022	664649		1.43881e+06	916098	7.13832e+06		3.75947e+06	7.10645e+06	1.94189e+06	1.60066e+06	1.05595e+06	263433	9.71159e+06	1.82739e+07	8.61289e+06	208622	1.46758e+06	717283	450588		225835			7.84527e+06	4.22363e+06	5.50944e+06	2.70468e+06	420498	3.36393e+06	9.2463e+06	625578	5.46874e+06	3.48203e+06	1.02683e+07	8.90691e+06
	High	[K].DNGCFR.[S]	1xCarbamidomethyl [C4]	2	5	P01023; P20742	P01023 [1076-1081]; P20742 [1082-1087]		0	768.309	0			3.66332e-17
	High	[K].KRTTVMVK.[N]	1xOxidation [M6]	1	9	P01023	P01023 [116-123]		2	978.576	0	0.178334	0.825465	0.88813											7007.39							63103.9			125292	129010		4384.62
	High	[K].MVSGFIPLK.[P]	1xOxidation [M1]	1	8	P01023	P01023 [1385-1393]		0	1007.56	0	0.0153372	0.378706	0.762794	1.79638e+06	2.20193e+06	1.80042e+06	856516	105745	452850	197239	358329	340114	807334	348927	54901.5	4655.65	10301.7	4615.63	7235.32	59442.2	11100	174557		39418.9	23913.1	228793	1.22923e+06	1.35736e+06	2.72348e+06	252117	52839.9	1.80233e+06	1.33639e+06	524892	22284.3	21466.7	128562	51089.2
[truncated: 20,870 more rows]
[truncated: 239 more columns]
