# Supplementary material for: A large-scale proteomics resource of circulating extracellular vesicles for biomarker discovery in pancreatic cancer
Source: eLife. 2024 Dec 18;12:RP87369. doi: 10.7554/eLife.87369 (PMC11655061; doi:10.7554/eLife.87369)
Supplement: Supplementary file 4. [file elife-87369-supp4.xlsx]

## Sheet: Sheet1
Supplementary Table 4: List of EV proteins that met the eligibility criteria for principal component analysis.
ProteinID	GeneName	EntrezID	HCvsPDAC log2Fold Change	HCvsPDAC pValue	HCvsCP log2Fold Change	HCvsCP pValue	HCvsIPMN log2Fold Change	HCvsIPMN pValue
P07148	FABP1	2168	20.3741	2.2537e-06	21.8335	6.74767e-05	23.8361	6.37825e-05
Q8WUM4	PDCD6IP	10015	20.0274	5.18858e-07	4.73147	0.12031	10.4486	0.0186765
Q8IW75	SERPINA12	145264	14.8065	0.000126835	-0.0720702	0.338352	-0.0720702	0.455545
Q9P0V3-1	SH3BP4	23677	13.9325	0.000160329	0	NA	0	NA
P61764	STXBP1	6812	13.7195	2.457e-05	9.30431	0.010728	7.16315	0.0880815
P05165-1	PCCA	5095	13.0743	0.00010579	12.0184	0.00163839	2.47914	0.286422
Q9BSJ8	ESYT1	23344	12.6266	0.000515755	10.1705	0.00962199	7.60121	0.0375412
Q01628	IFITM3	10410	12.5047	0.000204136	8.38207	0.02259	4.96432	0.224168
O15162	PLSCR1	5359	12.4321	0.000239731	4.86395	0.0926308	0	NA
Q5JXB2	UBE2NL	389898	11.9644	0.000320695	-0.0606016	1	4.0258	0.224168
P48509	CD151	977	11.8634	0.000427862	13.42	0.00164444	14.6003	0.00114329
Q99808	SLC29A1	2030	11.8088	0.000212198	10.5738	0.0055953	10.2134	0.0358852
P63208	SKP1	6500	11.7882	0.000742922	0	NA	5.4987	0.103884
P20810-1	CAST	831	11.2828	1.52137e-05	5.98296	0.0267092	5.06628	0.133255
Q5TDH0-3	DDI2	84301	11.2584	0.000515696	3.16601	0.186332	0	NA
P24539	ATP5F1	NA	11.1543	0.000930471	8.05313	0.0302369	-3.50625	0.245377
P08473	MME	4311	11.1175	0.000698647	9.35547	0.010728	11.2892	0.0107079
Q92820	GGH	8836	11.1145	0.00175679	0	NA	0	NA
P54920	NAPA	8775	10.7335	0.000529018	4.51981	0.273132	7.44349	0.166161
O15400-2	STX7	8417	10.6363	0.000999968	1.48413	0.636233	3.18514	0.398149
Q8NBP7-1	PCSK9	255738	10.3381	0.000237575	4.8902	0.141991	4.50953	0.233055
P61163	ACTR1A	10121	10.1015	0.00409409	3.19853	0.563212	9.53986	0.0377841
Q7Z5J8-1	ANKAR	150709	9.81935	0.000515853	0.721917	0.384088	0	NA
Q13576-1	IQGAP2	10788	9.61168	0.00162895	8.89313	0.00575994	2.42637	0.398149
O95466-3	FMNL1	752	9.60288	0.00243153	6.79783	0.0213545	6.02858	0.0375412
Q9C0C9	UBE2O	63893	9.60145	0.0047221	3.51832	0.22122	2.71923	0.515348
Q15555	MAPRE2	10982	9.55561	0.0024313	4.75337	0.0926308	2.46654	0.286422
A0A0C4DH24	IGKV6-21	28906	9.447	0.00593849	8.93281	0.046777	4.597	0.272587
P23276	KEL	3792	9.41332	0.00228026	4.66644	0.0541113	12.1561	0.00654877
P48426	PIP4K2A	5305	9.33377	0.00206938	4.98965	0.0452592	0	NA
P05186-1	ALPL	249	9.28098	0.00243137	11.6313	0.00410426	12.7464	0.00402612
P51149	RAB7A	7879	9.21429	0.000704711	6.84401	0.061215	8.44151	0.0398974
A0A075B6K0	IGLV3-16	28799	9.17298	0.00451617	12.8007	0.00164444	0	NA
P10619	CTSA	5476	9.05276	0.0105322	-3.17006	0.475491	6.12664	0.283532
P17858-2	PFKL	5211	8.84397	0.00319019	-1.63694	0.338352	0.225451	0.474645
P16615-4	ATP2A2	488	8.34723	0.00355212	2.664	0.550006	6.55602	0.126599
P63218	GNG5	2787	8.30107	0.000182479	8.73945	0.000772233	8.40016	0.0114201
Q9ULV4-3	CORO1C	23603	7.82432	0.0108754	14.6846	0.000159618	7.39439	0.0798711
O75955	FLOT1	10211	7.77887	3.49434e-07	8.12873	5.91682e-06	4.16117	0.0908417
P09622	DLD	1738	7.43108	0.00620635	-4.92597	0.0658654	-4.92597	0.134946
P49862	KLK7	5650	6.73195	0.023255	13.5207	0.000614312	5.11932	0.103884
Q14974	KPNB1	3837	6.62513	0.00325053	4.84983	0.193313	2.50467	0.189347
P31025	LCN1	3933	6.55048	0.00284924	3.82108	0.0452592	2.74138	0.103884
P27824	CANX	821	6.15933	4.60167e-06	6.03851	0.000791067	-0.14398	0.535007
P29350-1	PTPN6	5777	6.07865	0.044551	12.5086	0.00260288	-9.18286	0.0377841
P62879	GNB2	2783	6.05231	0.138278	11.1691	0.00211775	2.96939	0.895821
P27487	DPP4	1803	5.89848	0.00927862	13.0157	6.71515e-05	3.22149	0.0375412
P11234-2	RALB	5899	5.78474	1.19163e-06	4.00693	0.0904695	3.70046	0.385729
O60832-1	DKC1	1736	5.77668	0.000768935	-3.4162	0.619327	-2.02991	0.381729
Q08830	FGL1	2267	5.49192	0.0052202	0.680316	0.417019	6.80016	0.0519121
Q9NZD2	GLTP	51228	5.11665	0.0488893	13.0631	0.000620465	-2.92355	0.245377
Q15833-1	STXBP2	6813	4.63595	0.0943832	12.2323	0.00198712	3.03515	0.398149
P25786-1	PSMA1	5682	4.43105	0.000457784	-0.923237	0.975316	3.36589	0.710088
P13716-1	ALAD	210	4.16313	6.58732e-07	2.40473	0.0069848	1.8291	0.0691578
O94919	ENDOD1	23052	4.15775	0.000111861	4.21617	0.00168777	2.96493	0.272287
P06576	ATP5B	NA	4.01534	0.00714082	5.18657	0.00254467	4.84444	0.025654
Q07617	SPAG1	6674	3.98005	0.0830228	0	NA	22.8852	6.31991e-05
P11166	SLC2A1	6513	3.71493	2.83444e-06	3.64997	0.00208362	3.04395	0.0157445
P01701	IGLV1-51	28820	3.30389	0.000190559	2.68699	0.185432	2.46053	0.562917
Q14847-2	LASP1	3927	3.27065	0.000496042	-3.8248	0.217215	-4.50562	0.186256
Q02985-1	CFHR3	10878	3.08939	6.90007e-05	2.44134	0.109469	1.85462	0.840385
P05164-2	MPO	4353	3.04858	3.75154e-05	0.954429	0.0793471	-0.697716	0.836384
P50991	CCT4	10575	2.73501	0.000837168	-5.94215	0.0443577	-0.698084	0.679575
P50990	CCT8	10694	2.65713	1.50238e-05	-0.704532	0.927908	0.766272	0.442142
Q9NP58-4	ABCB6	10058	2.49364	0.126867	9.97981	0.000212406	2.2535	0.286422
P04792	HSPB1	3315	2.46324	0.0099059	2.04645	0.346999	1.79577	0.535366
Q14254	FLOT2	2319	2.34853	2.18715e-06	2.30147	0.000400864	2.02553	0.00497473
P02724	GYPA	2993	2.34206	0.00618954	2.7552	0.0268002	0.229827	0.492022
Q8NF91-7	SYNE1	23345	2.33864	1.04499e-05	-0.596238	0.156804	-0.377122	0.12884
P61981	YWHAG	7532	2.04856	0.0108535	0.6299	0.26782	-3.20202	0.0285179
P22352	GPX3	2878	2.03785	0.00377471	1.69208	0.059498	-4.15641	0.0691578
P61006	RAB8A	4218	1.89663	6.87363e-06	1.58081	0.000545826	1.20331	0.0351594
Q09666-1	AHNAK	79026	1.84094	1.55412e-06	0.396384	0.156804	0.864157	0.0408827
Q9HDC9	APMAP	57136	1.73971	1.04273e-06	1.13516	0.000793443	1.23106	0.00437201
Q5VST9-6	OBSCN	84033	1.69913	5.41738e-07	0.78057	0.000220259	0.0561259	0.836242
Q03164	KMT2A	4297	1.67596	0.000202947	-0.115492	0.950912	-4.90628	0.649579
P69905	HBA2	3040	1.60876	1.77064e-05	1.16509	0.0266407	0.791849	0.0284481
P06733-1	ENO1	2023	1.59674	7.97099e-06	1.02644	0.00615397	0.637248	0.0522219
P28072	PSMB6	5694	1.59001	0.00785356	-0.415733	0.880112	1.98556	0.0408827
P0DJI9	SAA2	6289	1.58517	0.000220443	-0.30273	0.975445	0.176815	0.200393
P04899-1	GNAI2	2771	1.39547	1.25556e-06	0.619749	0.0126152	0.161144	0.385729
Q02413	DSG1	1828	1.33701	0.000805312	0.484416	0.0903898	0.238263	0.432582
Q9BZQ6	EDEM3	80267	1.31761	0.755334	12.7101	0.000421152	8.42418	0.024834
P05107	ITGB2	3689	1.30557	0.000265677	-0.407945	0.65055	-0.180888	0.716784
P48735	IDH2	3418	1.29414	0.00250189	-0.69642	0.0067551	-0.314473	0.08278
A0A0B4J1X5	IGHV3-74	28408	1.22691	0.00163332	0.244521	0.449137	-1.12606	0.0259321
Q13418	ILK	3611	1.20844	0.000190499	1.44687	1.03544e-05	0.651059	0.0620253
P01031	C5	727	1.18074	9.96525e-05	0.070876	0.477995	0.0272697	0.678507
Q8IZT6-1	ASPM	259266	1.1553	0.00377666	1.84974	7.13725e-05	0.0421422	0.836384
P05556-5	ITGB1	3688	1.15292	0.000774909	0.33043	0.65055	0.287738	0.772288
P05556-1	ITGB1	3688	1.15292	0.000774909	0.33043	0.65055	0.287738	0.772288
P67936	TPM4	7171	1.11935	0.000360595	1.11431	0.00187831	0.578577	0.206001
P67936-2	TPM4	7171	1.11935	0.000360595	1.11431	0.00187831	0.578577	0.206001
Q8IY51	TIGD4	201798	1.09615	0.000352904	0.247733	0.267465	0.363888	0.28244
P29375-1	KDM5A	5927	1.07129	0.00335485	0.898559	0.0645735	1.19432	0.002568
Q12789-2	GTF3C1	2975	1.06243	0.000496008	-0.279631	0.147986	1.50122	0.000326302
P19013	KRT4	3851	1.03461	0.000288052	-0.394955	0.055793	0.0847243	0.803932
P15144	ANPEP	290	1.02025	0.00175522	0.663271	0.0793471	0.613903	0.137027
Q8NGP6	OR5M8	219484	0.975968	0.319692	16.2381	6.74767e-05	12.2277	0.00114329
P61160-1	ACTR2	10097	0.910822	0.284744	6.55548	0.000978029	4.24342	0.431772
P02549-1	SPTA1	6708	0.902209	1.25804e-05	1.08917	0.00061841	0.685818	0.0312047
Q9NQC3	RTN4	57142	0.609379	0.00390632	1.08624	0.000281128	1.01357	5.29227e-05
P02775	PPBP	5473	0.566541	0.0345184	2.52957	0.000449838	1.2008	0.215298
P11171-2	EPB41	2035	0.53999	0.0651143	1.1708	0.0020783	1.50488	0.000317536
P11171-4	EPB41	2035	0.53999	0.0651143	1.1708	0.0020783	1.50488	0.000317536
P61026	RAB10	10890	0.417488	0.0100577	1.15168	0.000883825	0.810872	0.0351594
A0A0B4J1V0	IGHV3-15	28448	0.254086	0.418742	1.15791	0.00136871	-0.355298	0.282863
O00468-5	AGRN	375790	0.0219044	0.446622	1.56725	0.000143483	-0.677029	0.0350792
P13646	KRT13	3860	-0.14807	0.536331	-1.05154	0.000143483	-0.020961	1
P13987	CD59	966	-0.524163	0.812019	1.22395	0.00122605	0.366818	0.116196
P14625	HSP90B1	7184	-0.991559	0.000127255	-1.43083	0.000152517	-1.22276	0.00079384
P00742	F10	2159	-1.01693	0.00324123	-0.39613	0.109469	-0.724561	0.00254029
Q08554-2	DSC1	1823	-1.04337	1.57384e-05	-0.292984	0.241906	-1.80955	0.000326302
O60281-1	ZNF292	23036	-1.05869	0.000398411	-1.27157	5.52471e-05	0.318059	0.082645
P06331	IGHV4-34	28395	-1.06785	0.00848795	-0.281498	0.324636	-0.271253	0.535366
P98160	HSPG2	3339	-1.12986	0.000129759	-0.0317591	0.901938	-0.324902	0.0230423
P00338-1	LDHA	3939	-1.13525	0.00108993	-0.497868	0.0741464	-0.136093	0.563089
P78371-1	CCT2	10576	-1.19841	0.00185252	-0.110184	0.734922	-0.415802	0.237543
Q92743	HTRA1	5654	-1.20741	0.00552497	-0.466885	0.781761	-0.590356	0.836384
O75083	WDR1	9948	-1.21866	0.0106894	-0.207989	0.558663	0.0810194	0.492022
Q8WUA8	TSKU	25987	-1.23726	0.00133654	-0.437294	0.405932	0.110833	0.679043
Q08431	MFGE8	4240	-1.26951	0.0200484	-1.38248	6.65642e-05	-0.864825	0.00223926
A0A075B6S2	IGKV2D-29	28882	-1.27393	0.00822939	0.250242	0.346999	-0.42235	0.237543
Q5T7N2	L1TD1	54596	-1.29772	0.882344	-15.0422	5.31689e-05	-0.768468	0.137027
P02741-1	CRP	1401	-1.30514	0.0643485	-4.24479	0.00122949	-4.23939	0.0019495
Q13200	PSMD2	5708	-1.31092	0.000346048	-0.528338	0.166015	0.108653	0.836384
P48594	SERPINB4	6318	-1.35359	3.04624e-05	-1.28059	0.00168777	-1.31316	0.000502765
Q9NQ36-1	SCUBE2	57758	-1.357	0.0031851	-0.199532	0.517613	-0.578109	0.0257189
P27918	CFP	5199	-1.40024	0.0069205	-0.934925	0.00615397	-0.312953	0.301788
P13639	EEF2	1938	-1.45295	4.12193e-07	-1.4804	1.4792e-06	0.0763549	0.967849
P00739-1	HPR	3250	-1.50688	0.000300188	-0.462606	0.084453	0.0941642	1
Q5T749	KPRP	448834	-1.51942	9.10975e-07	-0.727187	0.000498357	-0.261485	0.38552
P07737	PFN1	5216	-1.56432	0.00245946	0.188638	0.525399	0.0033458	0.934163
P15169	CPN1	1369	-1.59023	0.00903325	-0.92385	0.0317437	-0.351322	0.599878
Q9UQB8-3	BAIAP2	10458	-1.66237	0.00282663	0.0710416	1	-0.506578	0.116517
P08319-2	ADH4	127	-1.6631	0.00121881	-0.408092	0.0792728	-0.469008	0.00725782
P04217	A1BG	1	-1.72457	6.95007e-07	-0.325756	0.068817	-0.426884	0.0691578
P20742	PZP	5858	-1.76739	3.48033e-06	-0.510525	0.00880382	-0.732883	0.00718126
Q9BWP8-9	COLEC11	78989	-1.79324	0.00722646	-0.250205	0.339148	-0.659303	0.00252341
P55056	APOC4	346	-1.93391	0.000580655	-0.54461	0.579358	-1.76303	0.00725782
P0CW18	PRSS56	646960	-1.95223	0.00973958	-0.199432	0.478213	-0.405606	0.0519121
P07359	GP1BA	2811	-2.02816	0.000182725	0.0136374	0.950912	-0.649706	0.0408827
Q86YA3-1	ZGRF1	55345	-2.11173	0.00157452	-0.012125	0.975439	-0.612454	0.0132027
O75882-1	ATRN	8455	-2.23924	0.00862215	0.00825389	1	-0.0107302	0.716784
P16671	CD36	948	-2.27121	0.00737184	-0.399301	0.218013	-0.394067	0.272287
P29144	TPP2	7174	-2.28039	0.00229311	-2.02136	0.000143483	-1.03171	0.0620253
P08174-5	CD55	1604	-2.36301	0.000526462	-0.87329	0.102728	0.319893	0.482572
Q04917	YWHAH	7533	-2.39549	0.00292626	0.536434	0.517923	0.37073	0.967849
P23083	IGHV1OR15-1	388077	-2.42729	0.00166259	-0.457756	0.565784	-0.429352	0.395041
Q8N960	CEP120	153241	-2.45421	1.7725e-07	-1.3636	0.131397	-0.216325	0.28244
A0A075B6K4	IGLV3-10	28803	-2.54585	0.000775639	-0.356543	0.229393	-0.185224	0.649148
P16070-12	CD44	960	-2.77948	6.15875e-05	-0.917612	1	-0.177647	0.301788
Q8IU54	IL29	NA	-2.90193	0.685703	8.35475	0.0024688	-2.986	0.359357
P00441	SOD1	6647	-3.41903	9.68269e-06	-0.282224	0.147886	-0.709298	0.00497473
P04430	IGKV1-16	28938	-3.55946	0.464217	-7.94829	0.00151825	0.44349	0.482379
Q01546	KRT76	51350	-3.86405	9.88227e-07	-0.275561	0.339985	-0.134839	0.967849
P62805	HIST1H4A	NA	-4.04112	0.0109592	-3.07183	0.0792306	-0.774936	0.395041
P00352	ALDH1A1	216	-4.13556	0.00542393	-10.6243	0.00185464	2.05255	0.777989
Q8TEC5	SH3RF2	153769	-4.14623	0.000390617	-0.214998	0.579358	0.791383	0.36309
Q9NRY5	FAM114A2	10827	-4.21742	7.50388e-05	0.645938	0.00972209	0.173938	0.804269
O14950	MYL12A	10627	-4.72625	0.00483602	-0.467021	0.46007	1.13559	0.0148117
P34932	HSPA4	3308	-4.98223	2.88009e-06	-0.0601418	0.525399	-0.696325	0.0574336
Q6ZN30	BNC2	54796	-5.02389	0.0014825	-2.93269	0.0793471	1.35085	0.00292785
Q9NQ79	CRTAC1	55118	-5.07399	0.000217508	-0.512426	0.0741464	-0.00262649	1
P09382	LGALS1	3956	-5.40731	0.00293382	-4.92958	0.133549	-0.312473	0.967849
Q96FQ6	S100A16	140576	-5.4197	0.00817562	-1.37153	0.280266	3.3715	0.679309
Q5J8M3-1	EMC4	51234	-5.50816	0.000149762	-1.21973	0.0012943	-0.391859	0.12884
P01766	IGHV3-13	28449	-5.55975	0.00892371	-6.15726	0.123422	-6.30829	0.0712286
P48163	ME1	4199	-5.56477	0.00046707	1.56405	0.449137	2.38372	0.395041
P47929	LGALS7	3963	-5.73259	0.00633263	-1.30136	0.0691565	-1.12697	0.264758
Q9UP83-3	COG5	10466	-5.80604	0.0415066	-13.0403	5.31689e-05	-0.107212	0.508324
Q14134-1	TRIM29	23650	-6.0723	0.010861	-6.79752	0.0410443	0.500248	0.836171
P84095	RHOG	391	-6.23337	0.00388349	-1.63217	0.926427	0.621579	0.0903651
Q9H3S7	PTPN23	25930	-6.33963	0.00329551	-4.8914	0.00555445	-0.120781	0.0506205
A0A0B4J1X8	IGHV3-43	28426	-6.40243	0.00600368	-5.28339	0.0779368	-3.6559	0.0627238
Q9Y6U3	SCIN	85477	-6.46513	0.000651669	-16.0043	4.32792e-05	-16.4271	0.00029028
P30153	PPP2R1A	5518	-6.49926	8.87416e-05	-1.94363	0.229969	-3.41249	0.00359874
A0A0C4DH25	IGKV3D-20	28874	-6.5069	0.00601095	-0.174354	0.339985	0.364074	0.407931
P01718	IGLV3-27	28791	-6.61317	4.1419e-05	-0.320339	0.694703	-1.42998	0.10865
P03950	ANG	283	-6.68108	0.00835129	-3.34748	0.516049	-3.86604	0.900951
P51659-1	HSD17B4	3295	-6.69521	0.00633709	-2.65243	0.064772	-1.60963	0.777989
Q86XI8	ZSWIM9	374920	-6.82111	5.43461e-05	-0.885375	0.00888779	-0.416269	0.08278
Q9Y613	FHOD1	29109	-6.82599	0.00569759	-13.6616	5.26408e-05	-3.13697	0.0755907
P08670	VIM	7431	-7.06188	0.00186252	1.07028	0.069363	1.4851	0.264548
A0A075B6R2	IGHV4-4	28401	-7.23452	0.000353966	-1.19525	0.0074085	-0.552501	0.0408827
Q9HCY8	S100A14	57402	-7.40636	1.60102e-06	-2.23357	0.000288445	-2.60229	0.000317536
P23219	PTGS1	5742	-7.4547	3.95618e-05	0.818381	0.0391799	0.92663	0.0327591
P19971	TYMP; SCO2	NA	-7.47055	0.00682067	-13.147	0.000412358	-0.0658304	0.0908417
Q92508	PIEZO1	9780	-7.57408	0.00175366	1.8196	0.558565	-1.05493	0.272287
A0A075B6H9	IGLV4-69	28784	-7.70484	9.09165e-06	-2.82965	0.00186369	0.462881	0.619525
Q86VP6-1	CAND1	55832	-7.74948	0.000214725	-6.13676	0.00674148	-4.21147	0.0132027
Q9UI42-1	CPA4	51200	-8.57035	4.56487e-05	-1.80463	7.16673e-05	-0.398839	0.310047
P06748	NPM1	4869	-8.68214	1.96404e-05	-0.449918	0.372053	-0.351372	0.341901
Q9NP80-1	PNPLA8	50640	-8.78682	0.00161697	-1.7043	0.65055	-8.13838	0.018401
P23284	PPIB	5479	-9.11247	0.00164197	-1.66016	0.287547	0.230942	0.481994
P28066-1	PSMA5	5686	-9.77006	5.25595e-05	-0.332976	0.711855	-0.656645	0.0389028
Q9NUD7	C20orf96	140680	-10.2536	0.00883	-1.13053	0.133549	0.0274668	0.840385
P01706	IGLV2-11	28816	-10.2557	0.000383649	-0.329597	0.189587	-0.35351	0.544759
Q68DK7	MSL1	339287	-10.5724	0.000978462	-0.152263	0.65055	0.16641	0.395041
Q9H444	CHMP4B	128866	-10.5962	0.00805057	2.57866	0.241906	2.97836	0.0429795
Q96M02-1	C10orf90	118611	-11.3352	0.000147277	-11.0112	0.00111626	-7.92331	0.00565079
A0A075B6I9	IGLV7-46	28775	-12.1983	4.96194e-05	-0.588772	0.877687	-0.178993	0.836384
Q14574-2	DSC3	1825	-12.866	2.84596e-06	-17.0431	8.52985e-05	-0.964631	0.0203488
Q8N0S2-1	SYCE1	93426	-13.0469	2.28055e-07	-6.61508	0.00234887	1.31824	0.12884
P01704	IGLV2-14	28815	-13.3687	2.73844e-07	-1.70639	0.242139	-0.734236	0.0506205
Q9C075	KRT23	25984	-13.4	4.41681e-08	-12.9254	0.00287474	-0.380422	0.0327591
Q6DHV5	CC2D2B	387707	-13.6031	1.08026e-07	-0.123791	0.339985	-0.142151	0.186063
Legend: List of 207 EV proteins used for principal component analysis. These proteins are significantly altered in at least one of the pancreas diseases compared to controls.
