# Supplementary material for: A large-scale proteomics resource of circulating extracellular vesicles for biomarker discovery in pancreatic cancer
Source: eLife. 2024 Dec 18;12:RP87369. doi: 10.7554/eLife.87369 (PMC11655061; doi:10.7554/eLife.87369)
Supplement: Supplementary file 6. [file elife-87369-supp6.xlsx]

## Sheet: Sheet1
Supplementary Table 6. List of EV proteins that are significantly altered in patients with metastatic versus non-metastatic diseases
ProteinID	GeneName	log2 Fold Change*	pValue
Q7Z5J8-1	ANKAR	9.45692	0.0030572
P00480	OTC	8.72549	0.00799737
Q92820	GGH	8.31497	0.00642964
Q86W25	NLRP13	8.11805	0.0080642
Q5IJ48	CRB2	7.55516	0.00799737
Q8IZ83	ALDH16A1	6.50174	0.0175746
P35900	KRT20	6.43605	0.0218743
P07738	BPGM	6.21136	0.0218743
P28070	PSMB4	6.06338	0.0142113
Q69YZ2	TMEM200B	5.99741	0.0290165
Q6UB99	ANKRD11	5.94874	0.0281177
O14523	C2CD2L	5.94097	0.0177876
P28906	CD34	5.84043	0.0472004
P98088	MUC5AC	5.73573	0.0487795
Q13277-1	STX3	5.69078	0.0253944
Q8NI99	ANGPTL6	5.62238	0.00799737
Q9Y230	RUVBL2	5.59032	0.0121365
Q5JXB2	UBE2NL	5.32653	0.00702035
P31025	LCN1	5.29064	0.0465189
P10619	CTSA	5.04498	0.00606207
O60664-1	PLIN3	4.68692	0.0487917
Q9P0V3-1	SH3BP4	4.63309	0.0280371
P03973	SLPI	4.5173	0.0487795
Q13296-1	SCGB2A2	4.51465	0.00494924
Q12913-1	PTPRJ	4.02833	0.0330138
O75223-1	GGCT	3.45662	0.0030572
O60832-1	DKC1	3.17204	0.0472004
Q6E0U4-6	DMKN	3.08531	0.00505675
P48643	CCT5	3.0732	0.0487795
P13798	APEH	2.84345	0.0163329
Q15485-1	FCN2	2.44312	0.00571011
O95810	SDPR	1.9594	0.0472004
P25786-1	PSMA1	1.92723	0.00571011
P0DOY2	IGLC2	1.90406	0.0175746
P15311	EZR	1.71528	0.00659805
Q7L576-1	CYFIP1	1.58807	0.036958
O00294-2	TULP1	1.35436	0.0030572
Q96L93-1	KIF16B	1.27616	0.0330138
P04070-2	PROC	1.2485	0.00659805
Q8WWZ8-1	OIT3	1.17428	0.00669085
P07195	LDHB	1.13209	0.0402583
Q08830	FGL1	1.06869	0.0498102
O00592-2	PODXL	1.04985	0.0175746
Q8WUA8	TSKU	-1.01073	0.00795931
P07996	THBS1	-1.03339	0.00289868
P78371-1	CCT2	-1.05822	0.0385518
P04196	HRG	-1.07165	0.00252353
P08575-2	PTPRC	-1.1123	0.00571011
P61626	LYZ	-1.18743	0.00785123
Q9NQ36-1	SCUBE2	-1.20878	0.0158059
P23229-6	ITGA6	-1.2325	0.0030572
P11226	MBL2	-1.26581	0.0104861
Q6ICB0	DESI1	-1.27539	0.00606207
Q13200	PSMD2	-1.36497	0.0330138
P08174-5	CD55	-1.37426	0.0175746
P13987	CD59	-1.37763	0.00823896
P50991	CCT4	-1.48062	0.0431525
P08319-2	ADH4	-1.51869	0.0374735
Q8NF91-7	SYNE1	-1.53422	0.00353917
P07359	GP1BA	-1.63009	0.00571011
P27918	CFP	-1.81709	0.00432668
Q04917	YWHAH	-1.97897	0.00659805
Q86YA3-1	ZGRF1	-2.00653	0.00905631
P16671	CD36	-2.0161	0.0163329
Q6AHZ1-1	ZNF518A	-2.16686	0.00571011
P61981	YWHAG	-2.17099	0.0142467
O14950	MYL12A	-2.3314	0.0312714
A0A075B6K4	IGLV3-10	-2.48689	0.00653128
Q8TEC5	SH3RF2	-2.76441	0.0265672
P11169	SLC2A3	-2.81716	0.00653128
Q86TH1	ADAMTSL2	-3.1052	0.00795931
P61225	RAP2B	-3.42442	0.0265672
Q7Z745-1	HEATR7B2	-3.45425	0.0330268
P34932	HSPA4	-3.48987	0.00785123
A0A0J9YX35	IGHV3-64D	-3.57246	0.0107609
Q9NRY5	FAM114A2	-4.05307	0.00549288
P23284	PPIB	-4.78461	0.0228742
A0A0C4DH25	IGKV3D-20	-4.88928	0.0163152
P54920	NAPA	-4.89885	0.0322889
P17900	GM2A	-5.75078	0.0472004
Q9HCH0	NCKAP5L	-6.05519	0.0156274
O15440	ABCC5	-6.21548	0.0175746
P01704	IGLV2-14	-6.38365	0.0280178
A0A075B6H9	IGLV4-69	-7.06142	0.00571011
Q8IW75	SERPINA12	-7.20422	0.00428118
*positive value represents over expression in metastatic group compared to non-metastatic group
