# Supplementary material for: A large-scale proteomics resource of circulating extracellular vesicles for biomarker discovery in pancreatic cancer
Source: eLife. 2024 Dec 18;12:RP87369. doi: 10.7554/eLife.87369 (PMC11655061; doi:10.7554/eLife.87369)
Supplement: Supplementary file 7. — Table B: The contingency table for 7-biomarker signature, offering insights into model accuracy for both the Internal-Discovery and External Validation cohorts. [file elife-87369-supp7.xlsx]

## Sheet: Table A
Supplementary Table 7. Support Vector Machine Prediction of 16 individual genes in Discovery Test and Validation Cohorts
GeneName	Discovery Test				Validation Cohort
	Sensitivity	Specificity	Precision	AUC	Sensitivity	Specificity	Precision	AUC
PDCD6IP	0.888889	0.833333	0.96	0.928782	0.916667	0.5	0.785714	0.863036
RUVBL2	1	0	0.818182	0.818632	1	0	0.666667	0.862727
CCT4	1	0	0.818182	0.887918	1	0	0.666667	0.816607
ATP5F1	1	0	0.818182	0.711957	1	0	0.666667	0.758641
PSME1	1	0	0.818182	0.818632	1	0	0.666667	0.68625
PFKL	1	0	0.818182	0.928782	1	0	0.666667	0.679172
CTSA	1	0	0.818182	0.563851	1	0	0.666667	0.678799
DLD	1	0	0.818182	0.563851	1	0	0.666667	0.678799
GGH	1	0	0.818182	0.563851	1	0	0.666667	0.678799
KRT20	1	0	0.818182	0.563851	1	0	0.666667	0.678799
SCIN	1	0.166667	0.84375	0.166667	0.541667	0.333333	0.619048	0.546742
SERPINA12	1	0	0.818182	0.166667	1	0	0.666667	0.546742
ATP5H	1	0	0.818182	0.711957	1	0	0.666667	0.512594
SLPI	1	0	0.818182	0.670472	1	0	0.666667	0.490806
LASP1	0.888889	0	0.8	0.737395	0.541667	0.333333	0.619048	0.482003
WFDC12	1	0	0.818182	0.789612	1	0	0.666667	0.43943

## Sheet: Table B
Supplementary Table 7. Support Vector Machine Prediction of 16 individual genes in Discovery Test and Validation Cohorts
SVM weights of individual markers in 7-Protein Biomarker
Gene Name	Weights
SERPINA12	5.77013
KRT20	5.47406
RUVBL2	5.35546
PDCD6IP	4.84048
CCT4	4.41383
DLD	4.2434
ATP5F1	1.83771
					SVM model prediction based on the 7-Protein Biomarker
SVM model prediction based on the 7Gene Biomarker
					Prediction in Discovery Test Cohort						Prediction in Validation Cohort
							PREDICTED						PREDICTED
							Benign	PDAC					Benign	PDAC
					TRUE	Benign	6	0			TRUE	Benign	5	7
						PDAC	0	27				PDAC	0	24
						Sensitivity = 1						Sensitivity = 1
						Specificity = 1						Specificity = 0.42
						Precision = 1						Precision = 0.77
						Predicted AUC = 1						Predicted AUC = 0.89
