# Supplementary material for: A large-scale proteomics resource of circulating extracellular vesicles for biomarker discovery in pancreatic cancer
Source: eLife. 2024 Dec 18;12:RP87369. doi: 10.7554/eLife.87369 (PMC11655061; doi:10.7554/eLife.87369)
Supplement: Supplementary file 8. [file elife-87369-supp8.xlsx]

## Sheet: Sheet1
Supplementary Table 8. List of 25 cEV proteins that met the eligibility criteria for validation studies.
ARHGEF12
ATP5F1
ATP5H
CAST
CCT4
COL12A1
CRB2
CTSA
DLD
GGH
KRT20
LASP1
MAPRE2
OAF
PDCD6IP
PDIA6
PFKL
PLSCR1
PSME1
RUVBL2
SCIN
SERPINA12
SLPI
STX7
WFDC12
