# Supplementary material for: A large-scale proteomics resource of circulating extracellular vesicles for biomarker discovery in pancreatic cancer
Source: eLife. 2024 Dec 18;12:RP87369. doi: 10.7554/eLife.87369 (PMC11655061; doi:10.7554/eLife.87369)
Supplement: Supplementary file 9. [file elife-87369-supp9.xlsx]

## Sheet: Sheet1
	Supplementary Table 9. Baseline characteristics of patients enrolled in the validation cohort.
		Pancreatic Cancer			Chronic Pancreatitis	IPMN
		I-II	III-IV	All Stages
	Number of subjects	9	15	24	6	6
	Age (mean, range)	70 (59-78)	63.5 (35-87)	66 (35-87)	67.5 (45-86)	67.3 (37-84)
	Gender (F)	0.444	0.6	0.541	0.166	0.5
	Baseline CA19-9 (mean, range)	650 (3 -1,969)	22,849 (3 -145,608)	13,768 (3 -145,608)	-	-
